# Supplementary material
Source: publisher site journal article supplement (https://www.spandidos-publications.com/7854/downloadSupplementary)
Supplement: Supplementary file 1 [file downloadSupplementary]

## Sheet: Supplementary table 1
Table SI. Primer sequences for ER stress-related genes in lung adenocarcinoma.
Gene	Sequence
TRDN
Forward Sequence	GGAGGACAAAGAGAAAGCAGCTG
Reverse Sequence	AGGTGGAATGGCTGGGCTTTGT
IL-6
Forward Sequence	AGACAGCCACTCACCTCTTCAG
Reverse Sequence	TTCTGCCAGTGCCTCTTTGCTG
BDNF
Forward Sequence	CATCCGAGGACAAGGTGGCTTG
Reverse Sequence	GCCGAACTTTCTGGTCCTCATC
NPY
Forward Sequence	GCTGCGACACTACATCAACCTC
Reverse Sequence	CTGTGCTTTCTCTCATCAAGAGG
CYP1A2
Forward Sequence	TCATCCTGGAGACCTTCCGACA
Reverse Sequence	GCCACTGGTTTACGAAGACACAG
COL2A1
Forward Sequence	CCTGGCAAAGATGGTGAGACAG
Reverse Sequence	CCTGGTTTTCCACCTTCACCTG
TRPA1
Forward Sequence	TCCTCTCCATCTGGCAGCAAAG
Reverse Sequence	GGACGCATGATGCAAAGCTGTC

## Sheet: Supplementary table 2
Table SII. Endoplasmic reticulum-related genes.
Gene Symbol	Description	Category	Uniprot ID	Gifts	GC Id	Relevance score	GeneCards Link
RYR2	Ryanodine Receptor 2	Protein Coding	Q92736	55	GC01P237042	132.737	https://www.genecards.org/cgi-bin/carddisp.pl?gene=RYR2
HSPA5	Heat Shock Protein Family A (Hsp70) Member 5	Protein Coding	P11021	58	GC09M125234	84.2175	https://www.genecards.org/cgi-bin/carddisp.pl?gene=HSPA5
ERN1	Endoplasmic Reticulum To Nucleus Signaling 1	Protein Coding	O75460	56	GC17M064039	78.65	https://www.genecards.org/cgi-bin/carddisp.pl?gene=ERN1
TRDN	Triadin	Protein Coding	Q13061	49	GC06M123198	66.0382	https://www.genecards.org/cgi-bin/carddisp.pl?gene=TRDN
ATP2A2	ATPase Sarcoplasmic/Endoplasmic Reticulum Ca2+ Transporting 2	Protein Coding	P16615	60	GC12P110280	59.9745	https://www.genecards.org/cgi-bin/carddisp.pl?gene=ATP2A2
SERP1	Stress Associated Endoplasmic Reticulum Protein 1	Protein Coding	Q9Y6X1	38	GC03M150541	58.5553	https://www.genecards.org/cgi-bin/carddisp.pl?gene=SERP1
EIF2AK3	Eukaryotic Translation Initiation Factor 2 Alpha Kinase 3	Protein Coding	Q9NZJ5	58	GC02M088556	57.8568	https://www.genecards.org/cgi-bin/carddisp.pl?gene=EIF2AK3
XBP1	X-Box Binding Protein 1	Protein Coding	P17861	55	GC22M028794	57.1062	https://www.genecards.org/cgi-bin/carddisp.pl?gene=XBP1
CASQ2	Calsequestrin 2	Protein Coding	O14958	53	GC01M115700	55.4475	https://www.genecards.org/cgi-bin/carddisp.pl?gene=CASQ2
ERAP1	Endoplasmic Reticulum Aminopeptidase 1	Protein Coding	Q9NZ08	53	GC05M096760	52.6128	https://www.genecards.org/cgi-bin/carddisp.pl?gene=ERAP1
ATP2A3	ATPase Sarcoplasmic/Endoplasmic Reticulum Ca2+ Transporting 3	Protein Coding	Q93084	52	GC17M003923	51.4915	https://www.genecards.org/cgi-bin/carddisp.pl?gene=ATP2A3
ERO1A	Endoplasmic Reticulum Oxidoreductase 1 Alpha	Protein Coding	Q96HE7	50	GC14M052640	50.8329	https://www.genecards.org/cgi-bin/carddisp.pl?gene=ERO1A
ATP2A1	ATPase Sarcoplasmic/Endoplasmic Reticulum Ca2+ Transporting 1	Protein Coding	O14983	57	GC16P081412	50.6679	https://www.genecards.org/cgi-bin/carddisp.pl?gene=ATP2A1
ATF6	Activating Transcription Factor 6	Protein Coding	P18850	57	GC01P161766	50.4697	https://www.genecards.org/cgi-bin/carddisp.pl?gene=ATF6
VCP	Valosin Containing Protein	Protein Coding	P55072	58	GC09M035085	49.9756	https://www.genecards.org/cgi-bin/carddisp.pl?gene=VCP
ERP29	Endoplasmic Reticulum Protein 29	Protein Coding	P30040	44	GC12P112013	49.8897	https://www.genecards.org/cgi-bin/carddisp.pl?gene=ERP29
SERP2	Stress Associated Endoplasmic Reticulum Protein Family Member 2	Protein Coding	Q8N6R1	36	GC13P044373	49.3181	https://www.genecards.org/cgi-bin/carddisp.pl?gene=SERP2
HERPUD1	Homocysteine Inducible ER Protein With Ubiquitin Like Domain 1	Protein Coding	Q15011	44	GC16P056932	48.9442	https://www.genecards.org/cgi-bin/carddisp.pl?gene=HERPUD1
ERP44	Endoplasmic Reticulum Protein 44	Protein Coding	Q9BS26	48	GC09M099979	48.4993	https://www.genecards.org/cgi-bin/carddisp.pl?gene=ERP44
ERAP2	Endoplasmic Reticulum Aminopeptidase 2	Protein Coding	Q6P179	49	GC05P096875	48.19	https://www.genecards.org/cgi-bin/carddisp.pl?gene=ERAP2
DDIT3	DNA Damage Inducible Transcript 3	Protein Coding	P35638	55	GC12M057516	48.162	https://www.genecards.org/cgi-bin/carddisp.pl?gene=DDIT3
ERGIC1	Endoplasmic Reticulum-Golgi Intermediate Compartment 1	Protein Coding	Q969X5	46	GC05P172834	46.482	https://www.genecards.org/cgi-bin/carddisp.pl?gene=ERGIC1
KDELR1	KDEL Endoplasmic Reticulum Protein Retention Receptor 1	Protein Coding	P24390	46	GC19M048382	46.1163	https://www.genecards.org/cgi-bin/carddisp.pl?gene=KDELR1
OS9	OS9 Endoplasmic Reticulum Lectin	Protein Coding	Q13438	48	GC12P057693	45.7087	https://www.genecards.org/cgi-bin/carddisp.pl?gene=OS9
KDELR2	KDEL Endoplasmic Reticulum Protein Retention Receptor 2	Protein Coding	P33947	47	GC07M006447	43.4236	https://www.genecards.org/cgi-bin/carddisp.pl?gene=KDELR2
ATF4	Activating Transcription Factor 4	Protein Coding	P18848	55	GC22P039519	42.474	https://www.genecards.org/cgi-bin/carddisp.pl?gene=ATF4
ERN2	Endoplasmic Reticulum To Nucleus Signaling 2	Protein Coding	Q76MJ5	42	GC16M023690	42.2781	https://www.genecards.org/cgi-bin/carddisp.pl?gene=ERN2
ERLEC1	Endoplasmic Reticulum Lectin 1	Protein Coding	Q96DZ1	44	GC02P053786	42.0982	https://www.genecards.org/cgi-bin/carddisp.pl?gene=ERLEC1
TP53	Tumor Protein P53	Protein Coding	P04637	62	GC17M007661	41.3154	https://www.genecards.org/cgi-bin/carddisp.pl?gene=TP53
CALR	Calreticulin	Protein Coding	P27797	60	GC19P012938	41.3129	https://www.genecards.org/cgi-bin/carddisp.pl?gene=CALR
ERO1B	Endoplasmic Reticulum Oxidoreductase 1 Beta	Protein Coding	Q86YB8	47	GC01M236216	40.9163	https://www.genecards.org/cgi-bin/carddisp.pl?gene=ERO1B
KDELR3	KDEL Endoplasmic Reticulum Protein Retention Receptor 3	Protein Coding	O43731	41	GC22P038468	40.1733	https://www.genecards.org/cgi-bin/carddisp.pl?gene=KDELR3
SEC16A	SEC16 Homolog A, Endoplasmic Reticulum Export Factor	Protein Coding	O15027	43	GC09M136440	39.9184	https://www.genecards.org/cgi-bin/carddisp.pl?gene=SEC16A
SOD2-OT1	SOD2 Overlapping Transcript 1	RNA Gene		18	GC06M159772	39.9038	https://www.genecards.org/cgi-bin/carddisp.pl?gene=SOD2-OT1
HSP90B1	Heat Shock Protein 90 Beta Family Member 1	Protein Coding	P14625	55	GC12P103930	39.8769	https://www.genecards.org/cgi-bin/carddisp.pl?gene=HSP90B1
BDNF-AS	BDNF Antisense RNA	RNA Gene		29	GC11P027466	38.6456	https://www.genecards.org/cgi-bin/carddisp.pl?gene=BDNF-AS
EIF2S1	Eukaryotic Translation Initiation Factor 2 Subunit Alpha	Protein Coding	P05198	54	GC14P067359	38.4773	https://www.genecards.org/cgi-bin/carddisp.pl?gene=EIF2S1
ERP27	Endoplasmic Reticulum Protein 27	Protein Coding	Q96DN0	43	GC12M014914	38.1176	https://www.genecards.org/cgi-bin/carddisp.pl?gene=ERP27
RER1	Retention In Endoplasmic Reticulum Sorting Receptor 1	Protein Coding	O15258	43	GC01P002391	37.9905	https://www.genecards.org/cgi-bin/carddisp.pl?gene=RER1
CANX	Calnexin	Protein Coding	P27824	54	GC05P179678	37.0604	https://www.genecards.org/cgi-bin/carddisp.pl?gene=CANX
LOC126806068	BRD4-Independent Group 4 Enhancer GRCh37_chr1:237947411-237948610	Functional Element		8	GC01P237784	36.6899	https://www.genecards.org/cgi-bin/carddisp.pl?gene=LOC126806068
ERMP1	Endoplasmic Reticulum Metallopeptidase 1	Protein Coding	Q7Z2K6	38	GC09M005749	35.8743	https://www.genecards.org/cgi-bin/carddisp.pl?gene=ERMP1
MAPK8	Mitogen-Activated Protein Kinase 8	Protein Coding	P45983	58	GC10P048306	35.7722	https://www.genecards.org/cgi-bin/carddisp.pl?gene=MAPK8
PDIA3	Protein Disulfide Isomerase Family A Member 3	Protein Coding	P30101	52	GC15P043746	35.3907	https://www.genecards.org/cgi-bin/carddisp.pl?gene=PDIA3
CHERP	Calcium Homeostasis Endoplasmic Reticulum Protein	Protein Coding	Q8IWX8	44	GC19M016517	35.3098	https://www.genecards.org/cgi-bin/carddisp.pl?gene=CHERP
HMOX1	Heme Oxygenase 1	Protein Coding	P09601	61	GC22P035380	35.0486	https://www.genecards.org/cgi-bin/carddisp.pl?gene=HMOX1
RYR1	Ryanodine Receptor 1	Protein Coding	P21817	56	GC19P113006	34.5128	https://www.genecards.org/cgi-bin/carddisp.pl?gene=RYR1
CPT2	Carnitine Palmitoyltransferase 2	Protein Coding	P23786	59	GC01P053196	33.5931	https://www.genecards.org/cgi-bin/carddisp.pl?gene=CPT2
BCL2	BCL2 Apoptosis Regulator	Protein Coding	P10415	59	GC18M063123	33.2123	https://www.genecards.org/cgi-bin/carddisp.pl?gene=BCL2
NFE2L2	NFE2 Like BZIP Transcription Factor 2	Protein Coding	Q16236	60	GC02M177227	32.8562	https://www.genecards.org/cgi-bin/carddisp.pl?gene=NFE2L2
APP	Amyloid Beta Precursor Protein	Protein Coding	P05067	59	GC21M025880	32.5448	https://www.genecards.org/cgi-bin/carddisp.pl?gene=APP
SYVN1	Synoviolin 1	Protein Coding	Q86TM6	50	GC11M125363	32.0722	https://www.genecards.org/cgi-bin/carddisp.pl?gene=SYVN1
P4HB	Prolyl 4-Hydroxylase Subunit Beta	Protein Coding	P07237	58	GC17M081843	31.0703	https://www.genecards.org/cgi-bin/carddisp.pl?gene=P4HB
LINC01672	Long Intergenic Non-Protein Coding RNA 1672	RNA Gene		19	GC01P020797	30.6594	https://www.genecards.org/cgi-bin/carddisp.pl?gene=LINC01672
SOD1	Superoxide Dismutase 1	Protein Coding	P00441	61	GC21P031659	30.0385	https://www.genecards.org/cgi-bin/carddisp.pl?gene=SOD1
CASP3	Caspase 3	Protein Coding	P42574	58	GC04M184627	28.7089	https://www.genecards.org/cgi-bin/carddisp.pl?gene=CASP3
DERL1	Derlin 1	Protein Coding	Q9BUN8	45	GC08M123013	28.5899	https://www.genecards.org/cgi-bin/carddisp.pl?gene=DERL1
MAPK14	Mitogen-Activated Protein Kinase 14	Protein Coding	Q16539	60	GC06P134977	27.687	https://www.genecards.org/cgi-bin/carddisp.pl?gene=MAPK14
LMAN1	Lectin, Mannose Binding 1	Protein Coding	P49257	54	GC18M059327	27.5144	https://www.genecards.org/cgi-bin/carddisp.pl?gene=LMAN1
NFE2L1	NFE2 Like BZIP Transcription Factor 1	Protein Coding	Q14494	48	GC17P112546	27.4142	https://www.genecards.org/cgi-bin/carddisp.pl?gene=NFE2L1
PPP1R15A	Protein Phosphatase 1 Regulatory Subunit 15A	Protein Coding	O75807	47	GC19P048872	27.2828	https://www.genecards.org/cgi-bin/carddisp.pl?gene=PPP1R15A
TNF	Tumor Necrosis Factor	Protein Coding	P01375	61	GC06P134820	27.0798	https://www.genecards.org/cgi-bin/carddisp.pl?gene=TNF
MIR7-3HG	MIR7-3 Host Gene	RNA Gene	Q8N6C7	34	GC19P112015	27.0055	https://www.genecards.org/cgi-bin/carddisp.pl?gene=MIR7-3HG
TXNDC12	Thioredoxin Domain Containing 12	Protein Coding	O95881	43	GC01M052020	26.9713	https://www.genecards.org/cgi-bin/carddisp.pl?gene=TXNDC12
PRKN	Parkin RBR E3 Ubiquitin Protein Ligase	Protein Coding	O60260	58	GC06M161348	26.9319	https://www.genecards.org/cgi-bin/carddisp.pl?gene=PRKN
G3BP1	G3BP Stress Granule Assembly Factor 1	Protein Coding	Q13283	49	GC05P151771	26.8467	https://www.genecards.org/cgi-bin/carddisp.pl?gene=G3BP1
DERL2	Derlin 2	Protein Coding	Q9GZP9	45	GC17M005471	26.6529	https://www.genecards.org/cgi-bin/carddisp.pl?gene=DERL2
CAT	Catalase	Protein Coding	P04040	60	GC11P034460	26.494	https://www.genecards.org/cgi-bin/carddisp.pl?gene=CAT
BCAP31	B Cell Receptor Associated Protein 31	Protein Coding	P51572	50	GC0XM153701	26.3977	https://www.genecards.org/cgi-bin/carddisp.pl?gene=BCAP31
CALM1	Calmodulin 1	Protein Coding	P0DP23	54	GC14P090396	26.3643	https://www.genecards.org/cgi-bin/carddisp.pl?gene=CALM1
PSEN1	Presenilin 1	Protein Coding	P49768	61	GC14P073136	26.341	https://www.genecards.org/cgi-bin/carddisp.pl?gene=PSEN1
DNAJC10	DnaJ Heat Shock Protein Family (Hsp40) Member C10	Protein Coding	Q8IXB1	43	GC02P182716	26.3097	https://www.genecards.org/cgi-bin/carddisp.pl?gene=DNAJC10
CASP4	Caspase 4	Protein Coding	P49662	54	GC11M104942	25.4861	https://www.genecards.org/cgi-bin/carddisp.pl?gene=CASP4
MAP3K5	Mitogen-Activated Protein Kinase Kinase Kinase 5	Protein Coding	Q99683	57	GC06M136557	25.438	https://www.genecards.org/cgi-bin/carddisp.pl?gene=MAP3K5
TMX2-CTNND1	TMX2-CTNND1 Readthrough (NMD Candidate)	RNA Gene		23	GC11P057712	25.3928	https://www.genecards.org/cgi-bin/carddisp.pl?gene=TMX2-CTNND1
HYOU1	Hypoxia Up-Regulated 1	Protein Coding	Q9Y4L1	53	GC11M126548	25.2049	https://www.genecards.org/cgi-bin/carddisp.pl?gene=HYOU1
CERNA3	Competing Endogenous LncRNA 3 For MiR-645	RNA Gene		19	GC08P056323	25.0418	https://www.genecards.org/cgi-bin/carddisp.pl?gene=CERNA3
DNAJB9	DnaJ Heat Shock Protein Family (Hsp40) Member B9	Protein Coding	Q9UBS3	43	GC07P108569	25.0094	https://www.genecards.org/cgi-bin/carddisp.pl?gene=DNAJB9
LMNA	Lamin A/C	Protein Coding	P02545	58	GC01P156082	24.7311	https://www.genecards.org/cgi-bin/carddisp.pl?gene=LMNA
BAX	BCL2 Associated X, Apoptosis Regulator	Protein Coding	Q07812	60	GC19P048954	24.7215	https://www.genecards.org/cgi-bin/carddisp.pl?gene=BAX
ATF6B	Activating Transcription Factor 6 Beta	Protein Coding	Q99941	46	GC06M032115	24.7154	https://www.genecards.org/cgi-bin/carddisp.pl?gene=ATF6B
INS	Insulin	Protein Coding	P01308	56	GC11M002159	24.5372	https://www.genecards.org/cgi-bin/carddisp.pl?gene=INS
AMFR	Autocrine Motility Factor Receptor	Protein Coding	Q9UKV5	52	GC16M056361	24.4391	https://www.genecards.org/cgi-bin/carddisp.pl?gene=AMFR
PDIA4	Protein Disulfide Isomerase Family A Member 4	Protein Coding	P13667	48	GC07M149003	24.3849	https://www.genecards.org/cgi-bin/carddisp.pl?gene=PDIA4
ITPR1	Inositol 1,4,5-Trisphosphate Receptor Type 1	Protein Coding	Q14643	58	GC03P004486	24.2234	https://www.genecards.org/cgi-bin/carddisp.pl?gene=ITPR1
LNPK	Lunapark, ER Junction Formation Factor	Protein Coding	Q9C0E8	43	GC02M175924	24.1166	https://www.genecards.org/cgi-bin/carddisp.pl?gene=LNPK
H6PD	Hexose-6-Phosphate Dehydrogenase/Glucose 1-Dehydrogenase	Protein Coding	O95479	53	GC01P009234	24.096	https://www.genecards.org/cgi-bin/carddisp.pl?gene=H6PD
DNAJC3	DnaJ Heat Shock Protein Family (Hsp40) Member C3	Protein Coding	Q13217	49	GC13P095677	23.866	https://www.genecards.org/cgi-bin/carddisp.pl?gene=DNAJC3
SIL1	SIL1 Nucleotide Exchange Factor	Protein Coding	Q9H173	50	GC05M138975	23.792	https://www.genecards.org/cgi-bin/carddisp.pl?gene=SIL1
HSPA4	Heat Shock Protein Family A (Hsp70) Member 4	Protein Coding	P34932	52	GC05P133062	23.7527	https://www.genecards.org/cgi-bin/carddisp.pl?gene=HSPA4
TXNDC5	Thioredoxin Domain Containing 5	Protein Coding	Q8NBS9	46	GC06M007893	23.7462	https://www.genecards.org/cgi-bin/carddisp.pl?gene=TXNDC5
BAG6	BAG Cochaperone 6	Protein Coding	P46379	47	GC06M031639	23.5438	https://www.genecards.org/cgi-bin/carddisp.pl?gene=BAG6
SEC23A	SEC23 Homolog A, COPII Coat Complex Component	Protein Coding	Q15436	51	GC14M039031	23.5011	https://www.genecards.org/cgi-bin/carddisp.pl?gene=SEC23A
SMAD5-AS1	SMAD5 Antisense RNA 1	RNA Gene	Q9Y6J3	29	GC05M136129	23.3819	https://www.genecards.org/cgi-bin/carddisp.pl?gene=SMAD5-AS1
STIM1	Stromal Interaction Molecule 1	Protein Coding	Q13586	58	GC11P010766	23.3485	https://www.genecards.org/cgi-bin/carddisp.pl?gene=STIM1
WFS1	Wolframin ER Transmembrane Glycoprotein	Protein Coding	O76024	54	GC04P006269	23.1735	https://www.genecards.org/cgi-bin/carddisp.pl?gene=WFS1
EIF2AK2	Eukaryotic Translation Initiation Factor 2 Alpha Kinase 2	Protein Coding	P19525	59	GC02M037099	23.1713	https://www.genecards.org/cgi-bin/carddisp.pl?gene=EIF2AK2
STIP1	Stress Induced Phosphoprotein 1	Protein Coding	P31948	51	GC11P088952	23.0069	https://www.genecards.org/cgi-bin/carddisp.pl?gene=STIP1
CLU	Clusterin	Protein Coding	P10909	56	GC08M027596	22.9893	https://www.genecards.org/cgi-bin/carddisp.pl?gene=CLU
CFTR	CF Transmembrane Conductance Regulator	Protein Coding	P13569	61	GC07P117287	22.9458	https://www.genecards.org/cgi-bin/carddisp.pl?gene=CFTR
SCN5A	Sodium Voltage-Gated Channel Alpha Subunit 5	Protein Coding	Q14524	59	GC03M038707	22.8512	https://www.genecards.org/cgi-bin/carddisp.pl?gene=SCN5A
MTOR	Mechanistic Target Of Rapamycin Kinase	Protein Coding	P42345	64	GC01M011106	22.755	https://www.genecards.org/cgi-bin/carddisp.pl?gene=MTOR
MAPK1	Mitogen-Activated Protein Kinase 1	Protein Coding	P28482	61	GC22M021759	22.4974	https://www.genecards.org/cgi-bin/carddisp.pl?gene=MAPK1
DNAJB11	DnaJ Heat Shock Protein Family (Hsp40) Member B11	Protein Coding	Q9UBS4	48	GC03P186567	22.3674	https://www.genecards.org/cgi-bin/carddisp.pl?gene=DNAJB11
FOS	Fos Proto-Oncogene, AP-1 Transcription Factor Subunit	Protein Coding	P01100	59	GC14P075278	22.3261	https://www.genecards.org/cgi-bin/carddisp.pl?gene=FOS
G3BP2	G3BP Stress Granule Assembly Factor 2	Protein Coding	Q9UN86	44	GC04M075642	22.2874	https://www.genecards.org/cgi-bin/carddisp.pl?gene=G3BP2
SIRT1	Sirtuin 1	Protein Coding	Q96EB6	58	GC10P067884	22.2459	https://www.genecards.org/cgi-bin/carddisp.pl?gene=SIRT1
MANF	Mesencephalic Astrocyte Derived Neurotrophic Factor	Protein Coding	P55145	48	GC03P051385	22.1179	https://www.genecards.org/cgi-bin/carddisp.pl?gene=MANF
MAN1B1	Mannosidase Alpha Class 1B Member 1	Protein Coding	Q9UKM7	55	GC09P137086	21.7838	https://www.genecards.org/cgi-bin/carddisp.pl?gene=MAN1B1
SLC6A4	Solute Carrier Family 6 Member 4	Protein Coding	P31645	57	GC17M030194	21.7518	https://www.genecards.org/cgi-bin/carddisp.pl?gene=SLC6A4
ANK2	Ankyrin 2	Protein Coding	Q01484	50	GC04P112735	21.524	https://www.genecards.org/cgi-bin/carddisp.pl?gene=ANK2
CXCL8	C-X-C Motif Chemokine Ligand 8	Protein Coding	P10145	53	GC04P073740	21.4222	https://www.genecards.org/cgi-bin/carddisp.pl?gene=CXCL8
HSPA1A	Heat Shock Protein Family A (Hsp70) Member 1A	Protein Coding	P0DMV8	55	GC06P134838	21.3589	https://www.genecards.org/cgi-bin/carddisp.pl?gene=HSPA1A
HSPA8	Heat Shock Protein Family A (Hsp70) Member 8	Protein Coding	P11142	58	GC11M123057	21.3279	https://www.genecards.org/cgi-bin/carddisp.pl?gene=HSPA8
ATF3	Activating Transcription Factor 3	Protein Coding	P18847	53	GC01P212565	21.3038	https://www.genecards.org/cgi-bin/carddisp.pl?gene=ATF3
HSP90AA1	Heat Shock Protein 90 Alpha Family Class A Member 1	Protein Coding	P07900	60	GC14M102080	21.1712	https://www.genecards.org/cgi-bin/carddisp.pl?gene=HSP90AA1
DERL3	Derlin 3	Protein Coding	Q96Q80	39	GC22M023834	21.1631	https://www.genecards.org/cgi-bin/carddisp.pl?gene=DERL3
EMSLR	E2F1 MRNA Stabilizing LncRNA	RNA Gene		19	GC07P106459	21.0688	https://www.genecards.org/cgi-bin/carddisp.pl?gene=EMSLR
HSF1	Heat Shock Transcription Factor 1	Protein Coding	Q00613	56	GC08P144291	21.0528	https://www.genecards.org/cgi-bin/carddisp.pl?gene=HSF1
STING1	Stimulator Of Interferon Response CGAMP Interactor 1	Protein Coding	Q86WV6	50	GC05M139492	21.0463	https://www.genecards.org/cgi-bin/carddisp.pl?gene=STING1
VAPB	VAMP Associated Protein B And C	Protein Coding	O95292	53	GC20P058389	21.0111	https://www.genecards.org/cgi-bin/carddisp.pl?gene=VAPB
OXSR1	Oxidative Stress Responsive Kinase 1	Protein Coding	O95747	48	GC03P038298	20.9951	https://www.genecards.org/cgi-bin/carddisp.pl?gene=OXSR1
SEL1L	SEL1L Adaptor Subunit Of SYVN1 Ubiquitin Ligase	Protein Coding	Q9UBV2	50	GC14M081471	20.9759	https://www.genecards.org/cgi-bin/carddisp.pl?gene=SEL1L
CREB3	CAMP Responsive Element Binding Protein 3	Protein Coding	O43889	45	GC09P057121	20.7431	https://www.genecards.org/cgi-bin/carddisp.pl?gene=CREB3
CREB3L1	CAMP Responsive Element Binding Protein 3 Like 1	Protein Coding	Q96BA8	50	GC11P047725	20.5377	https://www.genecards.org/cgi-bin/carddisp.pl?gene=CREB3L1
PARK7	Parkinsonism Associated Deglycase	Protein Coding	Q99497	56	GC01P039429	20.4401	https://www.genecards.org/cgi-bin/carddisp.pl?gene=PARK7
IL6	Interleukin 6	Protein Coding	P05231	60	GC07P022725	20.3842	https://www.genecards.org/cgi-bin/carddisp.pl?gene=IL6
SELENOS	Selenoprotein S	Protein Coding	Q9BQE4	42	GC15M148764	20.2082	https://www.genecards.org/cgi-bin/carddisp.pl?gene=SELENOS
HSPB1	Heat Shock Protein Family B (Small) Member 1	Protein Coding	P04792	60	GC07P076302	20.1823	https://www.genecards.org/cgi-bin/carddisp.pl?gene=HSPB1
ERGIC3	ERGIC And Golgi 3	Protein Coding	Q9Y282	45	GC20P035542	20.0871	https://www.genecards.org/cgi-bin/carddisp.pl?gene=ERGIC3
CYCS	Cytochrome C, Somatic	Protein Coding	P99999	57	GC07M025118	20.0747	https://www.genecards.org/cgi-bin/carddisp.pl?gene=CYCS
RTN4	Reticulon 4	Protein Coding	Q9NQC3	53	GC02M054934	20.0291	https://www.genecards.org/cgi-bin/carddisp.pl?gene=RTN4
JUN	Jun Proto-Oncogene, AP-1 Transcription Factor Subunit	Protein Coding	P05412	58	GC01M058780	19.9652	https://www.genecards.org/cgi-bin/carddisp.pl?gene=JUN
GSR	Glutathione-Disulfide Reductase	Protein Coding	P00390	59	GC08M030678	19.8694	https://www.genecards.org/cgi-bin/carddisp.pl?gene=GSR
VAPA	VAMP Associated Protein A	Protein Coding	Q9P0L0	51	GC18P009938	19.8336	https://www.genecards.org/cgi-bin/carddisp.pl?gene=VAPA
H19	H19 Imprinted Maternally Expressed Transcript	RNA Gene		34	GC11M001995	19.8034	https://www.genecards.org/cgi-bin/carddisp.pl?gene=H19
CRH	Corticotropin Releasing Hormone	Protein Coding	P06850	52	GC08M066176	19.7788	https://www.genecards.org/cgi-bin/carddisp.pl?gene=CRH
EPM2A	EPM2A Glucan Phosphatase, Laforin	Protein Coding	B3EWF7	51	GC06M145382	19.7368	https://www.genecards.org/cgi-bin/carddisp.pl?gene=EPM2A
AKT1	AKT Serine/Threonine Kinase 1	Protein Coding	P31749	62	GC14M104769	19.7028	https://www.genecards.org/cgi-bin/carddisp.pl?gene=AKT1
PARP1	Poly(ADP-Ribose) Polymerase 1	Protein Coding	P09874	59	GC01M226360	19.4512	https://www.genecards.org/cgi-bin/carddisp.pl?gene=PARP1
TXN	Thioredoxin	Protein Coding	P10599	55	GC09M110243	19.4095	https://www.genecards.org/cgi-bin/carddisp.pl?gene=TXN
UFL1	UFM1 Specific Ligase 1	Protein Coding	O94874	43	GC06P096521	19.2351	https://www.genecards.org/cgi-bin/carddisp.pl?gene=UFL1
SEC61B	SEC61 Translocon Subunit Beta	Protein Coding	P60468	46	GC09P099222	19.1476	https://www.genecards.org/cgi-bin/carddisp.pl?gene=SEC61B
YIPF5	Yip1 Domain Family Member 5	Protein Coding	Q969M3	46	GC05M144158	19.082	https://www.genecards.org/cgi-bin/carddisp.pl?gene=YIPF5
KCNH2	Potassium Voltage-Gated Channel Subfamily H Member 2	Protein Coding	Q12809	59	GC07M150944	19.0612	https://www.genecards.org/cgi-bin/carddisp.pl?gene=KCNH2
PDIA2	Protein Disulfide Isomerase Family A Member 2	Protein Coding	Q13087	48	GC16P080156	19.0487	https://www.genecards.org/cgi-bin/carddisp.pl?gene=PDIA2
CASQ1	Calsequestrin 1	Protein Coding	P31415	52	GC01P160190	19.0288	https://www.genecards.org/cgi-bin/carddisp.pl?gene=CASQ1
SOD2	Superoxide Dismutase 2	Protein Coding	P04179	56	GC06M159669	19.0156	https://www.genecards.org/cgi-bin/carddisp.pl?gene=SOD2
CKAP4	Cytoskeleton Associated Protein 4	Protein Coding	Q07065	46	GC12M106237	18.8987	https://www.genecards.org/cgi-bin/carddisp.pl?gene=CKAP4
DNAH8	Dynein Axonemal Heavy Chain 8	Protein Coding	Q96JB1	47	GC06P135004	18.881	https://www.genecards.org/cgi-bin/carddisp.pl?gene=DNAH8
EDEM1	ER Degradation Enhancing Alpha-Mannosidase Like Protein 1	Protein Coding	Q92611	50	GC03P005187	18.8087	https://www.genecards.org/cgi-bin/carddisp.pl?gene=EDEM1
SREBF1	Sterol Regulatory Element Binding Transcription Factor 1	Protein Coding	P36956	58	GC17M017810	18.7106	https://www.genecards.org/cgi-bin/carddisp.pl?gene=SREBF1
BDNF	Brain Derived Neurotrophic Factor	Protein Coding	P23560	58	GC11M027654	18.703	https://www.genecards.org/cgi-bin/carddisp.pl?gene=BDNF
SIGMAR1	Sigma Non-Opioid Intracellular Receptor 1	Protein Coding	Q99720	55	GC09M034634	18.7023	https://www.genecards.org/cgi-bin/carddisp.pl?gene=SIGMAR1
SEC61A1	SEC61 Translocon Subunit Alpha 1	Protein Coding	P61619	52	GC03P128051	18.6943	https://www.genecards.org/cgi-bin/carddisp.pl?gene=SEC61A1
PRNP	Prion Protein (Kanno Blood Group)	Protein Coding	F7VJQ1	57	GC20P004686	18.662	https://www.genecards.org/cgi-bin/carddisp.pl?gene=PRNP
TMEM33	Transmembrane Protein 33	Protein Coding	P57088	42	GC04P041937	18.6342	https://www.genecards.org/cgi-bin/carddisp.pl?gene=TMEM33
ERLIN2	ER Lipid Raft Associated 2	Protein Coding	O94905	51	GC08P037736	18.5624	https://www.genecards.org/cgi-bin/carddisp.pl?gene=ERLIN2
MIA3	MIA SH3 Domain ER Export Factor 3	Protein Coding	Q5JRA6	46	GC01P222618	18.4954	https://www.genecards.org/cgi-bin/carddisp.pl?gene=MIA3
SEC31A	SEC31 Homolog A, COPII Coat Complex Component	Protein Coding	O94979	51	GC04M082818	18.227	https://www.genecards.org/cgi-bin/carddisp.pl?gene=SEC31A
RPN1	Ribophorin I	Protein Coding	P04843	50	GC03M128619	18.1936	https://www.genecards.org/cgi-bin/carddisp.pl?gene=RPN1
ABL1	ABL Proto-Oncogene 1, Non-Receptor Tyrosine Kinase	Protein Coding	P00519	61	GC09P130713	18.1822	https://www.genecards.org/cgi-bin/carddisp.pl?gene=ABL1
ATP13A1	ATPase 13A1	Protein Coding	Q9HD20	46	GC19M019645	18.0777	https://www.genecards.org/cgi-bin/carddisp.pl?gene=ATP13A1
NR3C1	Nuclear Receptor Subfamily 3 Group C Member 1	Protein Coding	P04150	58	GC05M143277	18.0658	https://www.genecards.org/cgi-bin/carddisp.pl?gene=NR3C1
TGFB1	Transforming Growth Factor Beta 1	Protein Coding	P01137	61	GC19M041301	17.9502	https://www.genecards.org/cgi-bin/carddisp.pl?gene=TGFB1
KEAP1	Kelch Like ECH Associated Protein 1	Protein Coding	Q14145	56	GC19M010486	17.9208	https://www.genecards.org/cgi-bin/carddisp.pl?gene=KEAP1
TMED4	Transmembrane P24 Trafficking Protein 4	Protein Coding	Q7Z7H5	44	GC07M044577	17.8999	https://www.genecards.org/cgi-bin/carddisp.pl?gene=TMED4
SURF4	Surfeit 4	Protein Coding	O15260	44	GC09M133361	17.8817	https://www.genecards.org/cgi-bin/carddisp.pl?gene=SURF4
GET3	Guided Entry Of Tail-Anchored Proteins Factor 3, ATPase	Protein Coding	O43681	47	GC19P012737	17.8421	https://www.genecards.org/cgi-bin/carddisp.pl?gene=GET3
CASP9	Caspase 9	Protein Coding	P55211	56	GC01M015491	17.8091	https://www.genecards.org/cgi-bin/carddisp.pl?gene=CASP9
SELENON	Selenoprotein N	Protein Coding	Q9NZV5	47	GC01P025800	17.8081	https://www.genecards.org/cgi-bin/carddisp.pl?gene=SELENON
DDRGK1	DDRGK Domain Containing 1	Protein Coding	Q96HY6	45	GC20M004081	17.728	https://www.genecards.org/cgi-bin/carddisp.pl?gene=DDRGK1
STX17	Syntaxin 17	Protein Coding	P56962	44	GC09P099906	17.6717	https://www.genecards.org/cgi-bin/carddisp.pl?gene=STX17
UBC	Ubiquitin C	Protein Coding	P0CG48	53	GC12M124911	17.6034	https://www.genecards.org/cgi-bin/carddisp.pl?gene=UBC
BSCL2	BSCL2 Lipid Droplet Biogenesis Associated, Seipin	Protein Coding	Q96G97	52	GC11M125248	17.5656	https://www.genecards.org/cgi-bin/carddisp.pl?gene=BSCL2
SERPINA1	Serpin Family A Member 1	Protein Coding	P01009	58	GC14M094376	17.5437	https://www.genecards.org/cgi-bin/carddisp.pl?gene=SERPINA1
SEC13	SEC13 Homolog, Nuclear Pore And COPII Coat Complex Component	Protein Coding	P55735	49	GC03M010293	17.5348	https://www.genecards.org/cgi-bin/carddisp.pl?gene=SEC13
SREBF2	Sterol Regulatory Element Binding Transcription Factor 2	Protein Coding	Q12772	52	GC22P041833	17.5072	https://www.genecards.org/cgi-bin/carddisp.pl?gene=SREBF2
RETREG1	Reticulophagy Regulator 1	Protein Coding	Q9H6L5	47	GC05M016574	17.4661	https://www.genecards.org/cgi-bin/carddisp.pl?gene=RETREG1
MIA2	MIA SH3 Domain ER Export Factor 2	Protein Coding	Q96PC5	47	GC14P039230	17.4497	https://www.genecards.org/cgi-bin/carddisp.pl?gene=MIA2
PTPN1	Protein Tyrosine Phosphatase Non-Receptor Type 1	Protein Coding	P18031	58	GC20P050510	17.4487	https://www.genecards.org/cgi-bin/carddisp.pl?gene=PTPN1
MBTPS1	Membrane Bound Transcription Factor Peptidase, Site 1	Protein Coding	Q14703	52	GC16M084053	17.3973	https://www.genecards.org/cgi-bin/carddisp.pl?gene=MBTPS1
MPO	Myeloperoxidase	Protein Coding	P05164	61	GC17M058269	17.3966	https://www.genecards.org/cgi-bin/carddisp.pl?gene=MPO
LMAN2	Lectin, Mannose Binding 2	Protein Coding	Q12907	46	GC05M179244	17.3181	https://www.genecards.org/cgi-bin/carddisp.pl?gene=LMAN2
TMX1	Thioredoxin Related Transmembrane Protein 1	Protein Coding	Q9H3N1	40	GC14P051240	17.2975	https://www.genecards.org/cgi-bin/carddisp.pl?gene=TMX1
PDIA6	Protein Disulfide Isomerase Family A Member 6	Protein Coding	Q15084	43	GC02M010784	17.2466	https://www.genecards.org/cgi-bin/carddisp.pl?gene=PDIA6
PGR-AS1	PGR Antisense RNA 1	RNA Gene		18	GC11P101131	17.2372	https://www.genecards.org/cgi-bin/carddisp.pl?gene=PGR-AS1
CASP8	Caspase 8	Protein Coding	Q14790	61	GC02P201233	17.2108	https://www.genecards.org/cgi-bin/carddisp.pl?gene=CASP8
INSIG1	Insulin Induced Gene 1	Protein Coding	O15503	46	GC07P155297	17.2064	https://www.genecards.org/cgi-bin/carddisp.pl?gene=INSIG1
STX5	Syntaxin 5	Protein Coding	Q13190	49	GC11M062806	17.1642	https://www.genecards.org/cgi-bin/carddisp.pl?gene=STX5
HSPA9	Heat Shock Protein Family A (Hsp70) Member 9	Protein Coding	P38646	56	GC05M138554	17.1046	https://www.genecards.org/cgi-bin/carddisp.pl?gene=HSPA9
CEBPB	CCAAT Enhancer Binding Protein Beta	Protein Coding	P17676	53	GC20P050190	17.081	https://www.genecards.org/cgi-bin/carddisp.pl?gene=CEBPB
TRA-TGC7-1	TRNA-Ala (Anticodon TGC) 7-1	RNA Gene		14	GC06M093612	16.9784	https://www.genecards.org/cgi-bin/carddisp.pl?gene=TRA-TGC7-1
SQSTM1	Sequestosome 1	Protein Coding	Q13501	58	GC05P179806	16.8998	https://www.genecards.org/cgi-bin/carddisp.pl?gene=SQSTM1
MAPK10	Mitogen-Activated Protein Kinase 10	Protein Coding	P53779	55	GC04M085990	16.8955	https://www.genecards.org/cgi-bin/carddisp.pl?gene=MAPK10
TMBIM6	Transmembrane BAX Inhibitor Motif Containing 6	Protein Coding	P55061	46	GC12P049707	16.8718	https://www.genecards.org/cgi-bin/carddisp.pl?gene=TMBIM6
PTGS2	Prostaglandin-Endoperoxide Synthase 2	Protein Coding	P35354	58	GC01M186671	16.8444	https://www.genecards.org/cgi-bin/carddisp.pl?gene=PTGS2
CREB3L2	CAMP Responsive Element Binding Protein 3 Like 2	Protein Coding	Q70SY1	47	GC07M137874	16.7933	https://www.genecards.org/cgi-bin/carddisp.pl?gene=CREB3L2
MBTPS2	Membrane Bound Transcription Factor Peptidase, Site 2	Protein Coding	O43462	50	GC0XP021839	16.7672	https://www.genecards.org/cgi-bin/carddisp.pl?gene=MBTPS2
TMED2	Transmembrane P24 Trafficking Protein 2	Protein Coding	Q15363	44	GC12P123584	16.7549	https://www.genecards.org/cgi-bin/carddisp.pl?gene=TMED2
MAPT	Microtubule Associated Protein Tau	Protein Coding	P10636	59	GC17P045894	16.7064	https://www.genecards.org/cgi-bin/carddisp.pl?gene=MAPT
BCL2L1	BCL2 Like 1	Protein Coding	Q07817	57	GC20M031664	16.6893	https://www.genecards.org/cgi-bin/carddisp.pl?gene=BCL2L1
VWF	Von Willebrand Factor	Protein Coding	P04275	56	GC12M029229	16.6534	https://www.genecards.org/cgi-bin/carddisp.pl?gene=VWF
APOB	Apolipoprotein B	Protein Coding	P04114	55	GC02M020956	16.6527	https://www.genecards.org/cgi-bin/carddisp.pl?gene=APOB
SCAP	SREBF Chaperone	Protein Coding	Q12770	50	GC03M047413	16.636	https://www.genecards.org/cgi-bin/carddisp.pl?gene=SCAP
IL1B	Interleukin 1 Beta	Protein Coding	P01584	56	GC02M112829	16.6011	https://www.genecards.org/cgi-bin/carddisp.pl?gene=IL1B
VEGFA	Vascular Endothelial Growth Factor A	Protein Coding	P15692	57	GC06P043770	16.5199	https://www.genecards.org/cgi-bin/carddisp.pl?gene=VEGFA
LRRK2	Leucine Rich Repeat Kinase 2	Protein Coding	Q5S007	58	GC12P040196	16.5003	https://www.genecards.org/cgi-bin/carddisp.pl?gene=LRRK2
UBE2J1	Ubiquitin Conjugating Enzyme E2 J1	Protein Coding	Q9Y385	50	GC06M089326	16.4881	https://www.genecards.org/cgi-bin/carddisp.pl?gene=UBE2J1
KCNQ1	Potassium Voltage-Gated Channel Subfamily Q Member 1	Protein Coding	P51787	58	GC11P002444	16.4274	https://www.genecards.org/cgi-bin/carddisp.pl?gene=KCNQ1
HMGCR	3-Hydroxy-3-Methylglutaryl-CoA Reductase	Protein Coding	P04035	56	GC05P075336	16.3788	https://www.genecards.org/cgi-bin/carddisp.pl?gene=HMGCR
NLRP3	NLR Family Pyrin Domain Containing 3	Protein Coding	Q96P20	57	GC01P247416	16.3699	https://www.genecards.org/cgi-bin/carddisp.pl?gene=NLRP3
ALB	Albumin	Protein Coding	P02768	58	GC04P073397	16.3435	https://www.genecards.org/cgi-bin/carddisp.pl?gene=ALB
SELENOK	Selenoprotein K	Protein Coding	Q9Y6D0	37	GC03M053884	16.3312	https://www.genecards.org/cgi-bin/carddisp.pl?gene=SELENOK
PSEN2	Presenilin 2	Protein Coding	P49810	58	GC01P226870	16.3273	https://www.genecards.org/cgi-bin/carddisp.pl?gene=PSEN2
RTN3	Reticulon 3	Protein Coding	O95197	50	GC11P088903	16.3229	https://www.genecards.org/cgi-bin/carddisp.pl?gene=RTN3
SNCA	Synuclein Alpha	Protein Coding	P37840	60	GC04M089724	16.3143	https://www.genecards.org/cgi-bin/carddisp.pl?gene=SNCA
EIF2AK1	Eukaryotic Translation Initiation Factor 2 Alpha Kinase 1	Protein Coding	Q9BQI3	53	GC07M006022	16.2774	https://www.genecards.org/cgi-bin/carddisp.pl?gene=EIF2AK1
CREB3L3	CAMP Responsive Element Binding Protein 3 Like 3	Protein Coding	Q68CJ9	46	GC19P004153	16.2142	https://www.genecards.org/cgi-bin/carddisp.pl?gene=CREB3L3
PLN	Phospholamban	Protein Coding	P26678	53	GC06P118548	16.1871	https://www.genecards.org/cgi-bin/carddisp.pl?gene=PLN
DLEU2	Deleted In Lymphocytic Leukemia 2	RNA Gene		30	GC13M049913	16.1837	https://www.genecards.org/cgi-bin/carddisp.pl?gene=DLEU2
TAPBP	TAP Binding Protein	Protein Coding	O15533	51	GC06M033299	16.1061	https://www.genecards.org/cgi-bin/carddisp.pl?gene=TAPBP
ERLIN1	ER Lipid Raft Associated 1	Protein Coding	O75477	51	GC10M100150	16.0383	https://www.genecards.org/cgi-bin/carddisp.pl?gene=ERLIN1
NOS3	Nitric Oxide Synthase 3	Protein Coding	P29474	59	GC07P158097	16.0257	https://www.genecards.org/cgi-bin/carddisp.pl?gene=NOS3
HLA-B	Major Histocompatibility Complex, Class I, B	Protein Coding	P01889	54	GC06M093738	16.0253	https://www.genecards.org/cgi-bin/carddisp.pl?gene=HLA-B
HMGB1	High Mobility Group Box 1	Protein Coding	P09429	57	GC13M030456	16.0152	https://www.genecards.org/cgi-bin/carddisp.pl?gene=HMGB1
SEC24A	SEC24 Homolog A, COPII Coat Complex Component	Protein Coding	O95486	46	GC05P134661	15.9935	https://www.genecards.org/cgi-bin/carddisp.pl?gene=SEC24A
NHLRC1	NHL Repeat Containing E3 Ubiquitin Protein Ligase 1	Protein Coding	Q6VVB1	49	GC06M018120	15.9735	https://www.genecards.org/cgi-bin/carddisp.pl?gene=NHLRC1
TARDBP	TAR DNA Binding Protein	Protein Coding	Q13148	56	GC01P039670	15.9559	https://www.genecards.org/cgi-bin/carddisp.pl?gene=TARDBP
SESN2	Sestrin 2	Protein Coding	P58004	45	GC01P042149	15.9455	https://www.genecards.org/cgi-bin/carddisp.pl?gene=SESN2
SCARNA5	Small Cajal Body-Specific RNA 5	RNA Gene		23	GC02P233275	15.9413	https://www.genecards.org/cgi-bin/carddisp.pl?gene=SCARNA5
NFKB1	Nuclear Factor Kappa B Subunit 1	Protein Coding	P19838	61	GC04P102501	15.9322	https://www.genecards.org/cgi-bin/carddisp.pl?gene=NFKB1
ESYT1	Extended Synaptotagmin 1	Protein Coding	Q9BSJ8	44	GC12P060607	15.899	https://www.genecards.org/cgi-bin/carddisp.pl?gene=ESYT1
RRBP1	Ribosome Binding Protein 1	Protein Coding	Q9P2E9	45	GC20M017613	15.788	https://www.genecards.org/cgi-bin/carddisp.pl?gene=RRBP1
ERGIC2	ERGIC And Golgi 2	Protein Coding	Q96RQ1	43	GC12M029337	15.7717	https://www.genecards.org/cgi-bin/carddisp.pl?gene=ERGIC2
NOX4	NADPH Oxidase 4	Protein Coding	Q9NPH5	51	GC11M089324	15.7494	https://www.genecards.org/cgi-bin/carddisp.pl?gene=NOX4
ATL3	Atlastin GTPase 3	Protein Coding	Q6DD88	47	GC11M063624	15.6584	https://www.genecards.org/cgi-bin/carddisp.pl?gene=ATL3
APOE	Apolipoprotein E	Protein Coding	P02649	59	GC19P113251	15.6529	https://www.genecards.org/cgi-bin/carddisp.pl?gene=APOE
FAF2	Fas Associated Factor Family Member 2	Protein Coding	Q96CS3	47	GC05P176447	15.575	https://www.genecards.org/cgi-bin/carddisp.pl?gene=FAF2
TOR1A	Torsin Family 1 Member A	Protein Coding	O14656	55	GC09M129812	15.5026	https://www.genecards.org/cgi-bin/carddisp.pl?gene=TOR1A
RPS27A	Ribosomal Protein S27a	Protein Coding	P62979	52	GC02P055231	15.4968	https://www.genecards.org/cgi-bin/carddisp.pl?gene=RPS27A
RAB1A	RAB1A, Member RAS Oncogene Family	Protein Coding	P62820	49	GC02M065072	15.473	https://www.genecards.org/cgi-bin/carddisp.pl?gene=RAB1A
CCL2	C-C Motif Chemokine Ligand 2	Protein Coding	P13500	58	GC17P034255	15.4401	https://www.genecards.org/cgi-bin/carddisp.pl?gene=CCL2
ORAI1	ORAI Calcium Release-Activated Calcium Modulator 1	Protein Coding	Q96D31	53	GC12P133267	15.4368	https://www.genecards.org/cgi-bin/carddisp.pl?gene=ORAI1
CACNA1S	Calcium Voltage-Gated Channel Subunit Alpha1 S	Protein Coding	Q13698	58	GC01M201008	15.4266	https://www.genecards.org/cgi-bin/carddisp.pl?gene=CACNA1S
XDH	Xanthine Dehydrogenase	Protein Coding	P47989	56	GC02M031334	15.409	https://www.genecards.org/cgi-bin/carddisp.pl?gene=XDH
PPIB	Peptidylprolyl Isomerase B	Protein Coding	P23284	58	GC15M064155	15.3639	https://www.genecards.org/cgi-bin/carddisp.pl?gene=PPIB
TRAM1	Translocation Associated Membrane Protein 1	Protein Coding	Q15629	46	GC08M070573	15.3624	https://www.genecards.org/cgi-bin/carddisp.pl?gene=TRAM1
SERPINH1	Serpin Family H Member 1	Protein Coding	P50454	55	GC11P075562	15.3615	https://www.genecards.org/cgi-bin/carddisp.pl?gene=SERPINH1
HSD17B10	Hydroxysteroid 17-Beta Dehydrogenase 10	Protein Coding	Q99714	55	GC0XM053431	15.3347	https://www.genecards.org/cgi-bin/carddisp.pl?gene=HSD17B10
PON1	Paraoxonase 1	Protein Coding	P27169	56	GC07M095297	15.3262	https://www.genecards.org/cgi-bin/carddisp.pl?gene=PON1
CISD2	CDGSH Iron Sulfur Domain 2	Protein Coding	Q8N5K1	49	GC04P102868	15.2458	https://www.genecards.org/cgi-bin/carddisp.pl?gene=CISD2
GSK3B	Glycogen Synthase Kinase 3 Beta	Protein Coding	P49841	59	GC03M119821	15.1943	https://www.genecards.org/cgi-bin/carddisp.pl?gene=GSK3B
SEC24B	SEC24 Homolog B, COPII Coat Complex Component	Protein Coding	O95487	48	GC04P109433	15.1837	https://www.genecards.org/cgi-bin/carddisp.pl?gene=SEC24B
FKBP14	FKBP Prolyl Isomerase 14	Protein Coding	Q9NWM8	49	GC07M031325	15.1599	https://www.genecards.org/cgi-bin/carddisp.pl?gene=FKBP14
MAPK3	Mitogen-Activated Protein Kinase 3	Protein Coding	P27361	58	GC16M044057	15.0466	https://www.genecards.org/cgi-bin/carddisp.pl?gene=MAPK3
UBE2J2	Ubiquitin Conjugating Enzyme E2 J2	Protein Coding	Q8N2K1	49	GC01M014177	15.0354	https://www.genecards.org/cgi-bin/carddisp.pl?gene=UBE2J2
EGFR	Epidermal Growth Factor Receptor	Protein Coding	P00533	63	GC07P055019	15.0196	https://www.genecards.org/cgi-bin/carddisp.pl?gene=EGFR
ASPH	Aspartate Beta-Hydroxylase	Protein Coding	Q12797	51	GC08M061500	15.007	https://www.genecards.org/cgi-bin/carddisp.pl?gene=ASPH
NQO1	NAD(P)H Quinone Dehydrogenase 1	Protein Coding	P15559	56	GC16M069706	14.9938	https://www.genecards.org/cgi-bin/carddisp.pl?gene=NQO1
HERPUD2	HERPUD Family Member 2	Protein Coding	Q9BSE4	39	GC07M035632	14.9619	https://www.genecards.org/cgi-bin/carddisp.pl?gene=HERPUD2
CANT1	Calcium Activated Nucleotidase 1	Protein Coding	Q8WVQ1	52	GC17M079682	14.961	https://www.genecards.org/cgi-bin/carddisp.pl?gene=CANT1
NOS2	Nitric Oxide Synthase 2	Protein Coding	P35228	58	GC17M027756	14.9493	https://www.genecards.org/cgi-bin/carddisp.pl?gene=NOS2
CRHR1	Corticotropin Releasing Hormone Receptor 1	Protein Coding	P34998	52	GC17P045784	14.909	https://www.genecards.org/cgi-bin/carddisp.pl?gene=CRHR1
TLR4	Toll Like Receptor 4	Protein Coding	O00206	60	GC09P117704	14.8831	https://www.genecards.org/cgi-bin/carddisp.pl?gene=TLR4
RAB1B	RAB1B, Member RAS Oncogene Family	Protein Coding	Q9H0U4	47	GC11P089145	14.8719	https://www.genecards.org/cgi-bin/carddisp.pl?gene=RAB1B
MAPK9	Mitogen-Activated Protein Kinase 9	Protein Coding	P45984	57	GC05M180309	14.7674	https://www.genecards.org/cgi-bin/carddisp.pl?gene=MAPK9
STUB1	STIP1 Homology And U-Box Containing Protein 1	Protein Coding	Q9UNE7	54	GC16P080174	14.7524	https://www.genecards.org/cgi-bin/carddisp.pl?gene=STUB1
STIM2	Stromal Interaction Molecule 2	Protein Coding	Q9P246	47	GC04P026859	14.7481	https://www.genecards.org/cgi-bin/carddisp.pl?gene=STIM2
BACE1	Beta-Secretase 1	Protein Coding	P56817	56	GC11M117285	14.7194	https://www.genecards.org/cgi-bin/carddisp.pl?gene=BACE1
GET4	Guided Entry Of Tail-Anchored Proteins Factor 4	Protein Coding	Q7L5D6	43	GC07P000876	14.6174	https://www.genecards.org/cgi-bin/carddisp.pl?gene=GET4
BAK1	BCL2 Antagonist/Killer 1	Protein Coding	Q16611	53	GC06M033572	14.5722	https://www.genecards.org/cgi-bin/carddisp.pl?gene=BAK1
TAP1	Transporter 1, ATP Binding Cassette Subfamily B Member	Protein Coding	Q03518	56	GC06M093850	14.567	https://www.genecards.org/cgi-bin/carddisp.pl?gene=TAP1
SEC63	SEC63 Homolog, Protein Translocation Regulator	Protein Coding	Q9UGP8	52	GC06M107867	14.5436	https://www.genecards.org/cgi-bin/carddisp.pl?gene=SEC63
INSIG2	Insulin Induced Gene 2	Protein Coding	Q9Y5U4	44	GC02P118088	14.5191	https://www.genecards.org/cgi-bin/carddisp.pl?gene=INSIG2
TXNIP	Thioredoxin Interacting Protein	Protein Coding	Q9H3M7	47	GC01M145992	14.5102	https://www.genecards.org/cgi-bin/carddisp.pl?gene=TXNIP
ATM	ATM Serine/Threonine Kinase	Protein Coding	Q13315	61	GC11P108223	14.5101	https://www.genecards.org/cgi-bin/carddisp.pl?gene=ATM
SEC62	SEC62 Homolog, Preprotein Translocation Factor	Protein Coding	Q99442	44	GC03P169966	14.4829	https://www.genecards.org/cgi-bin/carddisp.pl?gene=SEC62
PRKAA1	Protein Kinase AMP-Activated Catalytic Subunit Alpha 1	Protein Coding	Q13131	55	GC05M040759	14.4726	https://www.genecards.org/cgi-bin/carddisp.pl?gene=PRKAA1
SRP54	Signal Recognition Particle 54	Protein Coding	P61011	50	GC14P034981	14.4576	https://www.genecards.org/cgi-bin/carddisp.pl?gene=SRP54
POMC	Proopiomelanocortin	Protein Coding	P01189	56	GC02M025160	14.4392	https://www.genecards.org/cgi-bin/carddisp.pl?gene=POMC
RTN1	Reticulon 1	Protein Coding	Q16799	45	GC14M059595	14.4381	https://www.genecards.org/cgi-bin/carddisp.pl?gene=RTN1
ARL6IP1	ADP Ribosylation Factor Like GTPase 6 Interacting Protein 1	Protein Coding	Q15041	46	GC16M021095	14.4123	https://www.genecards.org/cgi-bin/carddisp.pl?gene=ARL6IP1
GPR37	G Protein-Coupled Receptor 37	Protein Coding	O15354	51	GC07M124745	14.3936	https://www.genecards.org/cgi-bin/carddisp.pl?gene=GPR37
ESYT2	Extended Synaptotagmin 2	Protein Coding	A0FGR8	44	GC07M158730	14.3798	https://www.genecards.org/cgi-bin/carddisp.pl?gene=ESYT2
ATL1	Atlastin GTPase 1	Protein Coding	Q8WXF7	50	GC14P050532	14.3464	https://www.genecards.org/cgi-bin/carddisp.pl?gene=ATL1
TEX264	Testis Expressed 264, ER-Phagy Receptor	Protein Coding	Q9Y6I9	43	GC03P057736	14.3231	https://www.genecards.org/cgi-bin/carddisp.pl?gene=TEX264
FOXO1	Forkhead Box O1	Protein Coding	Q12778	60	GC13M040555	14.321	https://www.genecards.org/cgi-bin/carddisp.pl?gene=FOXO1
UBL4A	Ubiquitin Like 4A	Protein Coding	P11441	45	GC0XM154483	14.3087	https://www.genecards.org/cgi-bin/carddisp.pl?gene=UBL4A
TRAF2	TNF Receptor Associated Factor 2	Protein Coding	Q12933	54	GC09P136881	14.3025	https://www.genecards.org/cgi-bin/carddisp.pl?gene=TRAF2
DDOST	Dolichyl-Diphosphooligosaccharide--Protein Glycosyltransferase Non-Catalytic Subunit	Protein Coding	P39656	53	GC01M020651	14.3001	https://www.genecards.org/cgi-bin/carddisp.pl?gene=DDOST
GBA1	Glucosylceramidase Beta 1	Protein Coding	P04062	58	GC01M161111	14.2806	https://www.genecards.org/cgi-bin/carddisp.pl?gene=GBA1
FKBP5	FKBP Prolyl Isomerase 5	Protein Coding	Q13451	58	GC06M093925	14.275	https://www.genecards.org/cgi-bin/carddisp.pl?gene=FKBP5
PINK1	PTEN Induced Kinase 1	Protein Coding	Q9BXM7	55	GC01P041392	14.2603	https://www.genecards.org/cgi-bin/carddisp.pl?gene=PINK1
NOTCH3	Notch Receptor 3	Protein Coding	Q9UM47	60	GC19M015159	14.2602	https://www.genecards.org/cgi-bin/carddisp.pl?gene=NOTCH3
SAR1B	Secretion Associated Ras Related GTPase 1B	Protein Coding	Q9Y6B6	50	GC05M134601	14.2486	https://www.genecards.org/cgi-bin/carddisp.pl?gene=SAR1B
CREB1	CAMP Responsive Element Binding Protein 1	Protein Coding	P16220	59	GC02P207529	14.2324	https://www.genecards.org/cgi-bin/carddisp.pl?gene=CREB1
CAV1	Caveolin 1	Protein Coding	Q03135	57	GC07P116524	14.2321	https://www.genecards.org/cgi-bin/carddisp.pl?gene=CAV1
BNIP1	BCL2 Interacting Protein 1	Protein Coding	Q12981	43	GC05P173144	14.1962	https://www.genecards.org/cgi-bin/carddisp.pl?gene=BNIP1
CCDC47	Coiled-Coil Domain Containing 47	Protein Coding	Q96A33	44	GC17M063745	14.1683	https://www.genecards.org/cgi-bin/carddisp.pl?gene=CCDC47
SEC61G	SEC61 Translocon Subunit Gamma	Protein Coding	P60059	39	GC07M054752	14.1631	https://www.genecards.org/cgi-bin/carddisp.pl?gene=SEC61G
TTN	Titin	Protein Coding	Q8WZ42	56	GC02M178525	14.1466	https://www.genecards.org/cgi-bin/carddisp.pl?gene=TTN
EIF4G1	Eukaryotic Translation Initiation Factor 4 Gamma 1	Protein Coding	Q04637	56	GC03P184314	14.1265	https://www.genecards.org/cgi-bin/carddisp.pl?gene=EIF4G1
MEG3	Maternally Expressed 3	RNA Gene		34	GC14P116735	14.0953	https://www.genecards.org/cgi-bin/carddisp.pl?gene=MEG3
DDX3X	DEAD-Box Helicase 3 X-Linked	Protein Coding	O00571	56	GC0XP041333	14.095	https://www.genecards.org/cgi-bin/carddisp.pl?gene=DDX3X
MYOC	Myocilin	Protein Coding	Q99972	50	GC01M171604	13.9998	https://www.genecards.org/cgi-bin/carddisp.pl?gene=MYOC
CRYAB	Crystallin Alpha B	Protein Coding	P02511	55	GC11M111908	13.9722	https://www.genecards.org/cgi-bin/carddisp.pl?gene=CRYAB
LOC110806262	Solute Carrier Family 6 Member 4 Gene Promoter	Functional Element		9	GC17P030235	13.9499	https://www.genecards.org/cgi-bin/carddisp.pl?gene=LOC110806262
SGK1	Serum/Glucocorticoid Regulated Kinase 1	Protein Coding	O00141	58	GC06M134169	13.9477	https://www.genecards.org/cgi-bin/carddisp.pl?gene=SGK1
TNFRSF10B	TNF Receptor Superfamily Member 10b	Protein Coding	O14763	59	GC08M023020	13.9379	https://www.genecards.org/cgi-bin/carddisp.pl?gene=TNFRSF10B
HTRA2	HtrA Serine Peptidase 2	Protein Coding	O43464	55	GC02P074529	13.931	https://www.genecards.org/cgi-bin/carddisp.pl?gene=HTRA2
FOXO3	Forkhead Box O3	Protein Coding	O43524	56	GC06P108559	13.9219	https://www.genecards.org/cgi-bin/carddisp.pl?gene=FOXO3
PRDX4	Peroxiredoxin 4	Protein Coding	Q13162	48	GC0XP023665	13.8888	https://www.genecards.org/cgi-bin/carddisp.pl?gene=PRDX4
UGGT1	UDP-Glucose Glycoprotein Glucosyltransferase 1	Protein Coding	Q9NYU2	48	GC02P128091	13.8534	https://www.genecards.org/cgi-bin/carddisp.pl?gene=UGGT1
MAPKAPK2	MAPK Activated Protein Kinase 2	Protein Coding	P49137	55	GC01P206684	13.821	https://www.genecards.org/cgi-bin/carddisp.pl?gene=MAPKAPK2
MALAT1	Metastasis Associated Lung Adenocarcinoma Transcript 1	RNA Gene		32	GC11P089089	13.7893	https://www.genecards.org/cgi-bin/carddisp.pl?gene=MALAT1
SLN	Sarcolipin	Protein Coding	O00631	41	GC11M126288	13.7648	https://www.genecards.org/cgi-bin/carddisp.pl?gene=SLN
NR3C2	Nuclear Receptor Subfamily 3 Group C Member 2	Protein Coding	P08235	55	GC04M148078	13.76	https://www.genecards.org/cgi-bin/carddisp.pl?gene=NR3C2
SLC35B1	Solute Carrier Family 35 Member B1	Protein Coding	P78383	43	GC17M049700	13.7489	https://www.genecards.org/cgi-bin/carddisp.pl?gene=SLC35B1
SEC22B	SEC22 Homolog B, Vesicle Trafficking Protein	Protein Coding	O75396	43	GC01M120150	13.7431	https://www.genecards.org/cgi-bin/carddisp.pl?gene=SEC22B
RNF186	Ring Finger Protein 186	Protein Coding	Q9NXI6	37	GC01M019814	13.7292	https://www.genecards.org/cgi-bin/carddisp.pl?gene=RNF186
RSAD2	Radical S-Adenosyl Methionine Domain Containing 2	Protein Coding	Q8WXG1	49	GC02P006865	13.7289	https://www.genecards.org/cgi-bin/carddisp.pl?gene=RSAD2
SOAT1	Sterol O-Acyltransferase 1	Protein Coding	P35610	53	GC01P179294	13.7144	https://www.genecards.org/cgi-bin/carddisp.pl?gene=SOAT1
COPB1	COPI Coat Complex Subunit Beta 1	Protein Coding	P53618	49	GC11M014436	13.7054	https://www.genecards.org/cgi-bin/carddisp.pl?gene=COPB1
UBQLN1	Ubiquilin 1	Protein Coding	Q9UMX0	52	GC09M083659	13.6698	https://www.genecards.org/cgi-bin/carddisp.pl?gene=UBQLN1
DNM1L	Dynamin 1 Like	Protein Coding	O00429	57	GC12P032679	13.6675	https://www.genecards.org/cgi-bin/carddisp.pl?gene=DNM1L
FOXRED2	FAD Dependent Oxidoreductase Domain Containing 2	Protein Coding	Q8IWF2	38	GC22M036487	13.6423	https://www.genecards.org/cgi-bin/carddisp.pl?gene=FOXRED2
EGF	Epidermal Growth Factor	Protein Coding	P01133	60	GC04P109912	13.6253	https://www.genecards.org/cgi-bin/carddisp.pl?gene=EGF
EIF2AK4	Eukaryotic Translation Initiation Factor 2 Alpha Kinase 4	Protein Coding	Q9P2K8	53	GC15P039934	13.6172	https://www.genecards.org/cgi-bin/carddisp.pl?gene=EIF2AK4
G6PD	Glucose-6-Phosphate Dehydrogenase	Protein Coding	P11413	59	GC0XM154598	13.6156	https://www.genecards.org/cgi-bin/carddisp.pl?gene=G6PD
CDKN1A	Cyclin Dependent Kinase Inhibitor 1A	Protein Coding	P38936	58	GC06P134985	13.6145	https://www.genecards.org/cgi-bin/carddisp.pl?gene=CDKN1A
BRSK2	BR Serine/Threonine Kinase 2	Protein Coding	Q8IWQ3	46	GC11P001389	13.6105	https://www.genecards.org/cgi-bin/carddisp.pl?gene=BRSK2
JPH2	Junctophilin 2	Protein Coding	Q9BR39	49	GC20M044111	13.6052	https://www.genecards.org/cgi-bin/carddisp.pl?gene=JPH2
SEC24C	SEC24 Homolog C, COPII Coat Complex Component	Protein Coding	P53992	51	GC10P073744	13.5983	https://www.genecards.org/cgi-bin/carddisp.pl?gene=SEC24C
SEC24D	SEC24 Homolog D, COPII Coat Complex Component	Protein Coding	O94855	51	GC04M118722	13.5909	https://www.genecards.org/cgi-bin/carddisp.pl?gene=SEC24D
PDCD6	Programmed Cell Death 6	Protein Coding	O75340	45	GC05P003278	13.5773	https://www.genecards.org/cgi-bin/carddisp.pl?gene=PDCD6
CAV3	Caveolin 3	Protein Coding	P56539	52	GC03P008733	13.5623	https://www.genecards.org/cgi-bin/carddisp.pl?gene=CAV3
HIF1A	Hypoxia Inducible Factor 1 Subunit Alpha	Protein Coding	Q16665	57	GC14P061695	13.5366	https://www.genecards.org/cgi-bin/carddisp.pl?gene=HIF1A
P4HTM	Prolyl 4-Hydroxylase, Transmembrane	Protein Coding	Q9NXG6	46	GC03P057616	13.5266	https://www.genecards.org/cgi-bin/carddisp.pl?gene=P4HTM
GBF1	Golgi Brefeldin A Resistant Guanine Nucleotide Exchange Factor 1	Protein Coding	Q92538	51	GC10P109824	13.5149	https://www.genecards.org/cgi-bin/carddisp.pl?gene=GBF1
FICD	FIC Domain Protein Adenylyltransferase	Protein Coding	Q9BVA6	42	GC12P108515	13.5121	https://www.genecards.org/cgi-bin/carddisp.pl?gene=FICD
RNF183	Ring Finger Protein 183	Protein Coding	Q96D59	39	GC09M113297	13.5032	https://www.genecards.org/cgi-bin/carddisp.pl?gene=RNF183
ADIPOQ	Adiponectin, C1Q And Collagen Domain Containing	Protein Coding	Q15848	55	GC03P186842	13.496	https://www.genecards.org/cgi-bin/carddisp.pl?gene=ADIPOQ
SNORD15A	Small Nucleolar RNA, C/D Box 15A	RNA Gene		23	GC11P075400	13.4926	https://www.genecards.org/cgi-bin/carddisp.pl?gene=SNORD15A
CNIH4	Cornichon Family AMPA Receptor Auxiliary Protein 4	Protein Coding	Q9P003	39	GC01P224356	13.4779	https://www.genecards.org/cgi-bin/carddisp.pl?gene=CNIH4
TMEM259	Transmembrane Protein 259	Protein Coding	Q4ZIN3	37	GC19M091667	13.4458	https://www.genecards.org/cgi-bin/carddisp.pl?gene=TMEM259
PRKAA2	Protein Kinase AMP-Activated Catalytic Subunit Alpha 2	Protein Coding	P54646	58	GC01P056645	13.4347	https://www.genecards.org/cgi-bin/carddisp.pl?gene=PRKAA2
NOD2	Nucleotide Binding Oligomerization Domain Containing 2	Protein Coding	Q9HC29	56	GC16P050693	13.4336	https://www.genecards.org/cgi-bin/carddisp.pl?gene=NOD2
PCSK9	Proprotein Convertase Subtilisin/Kexin Type 9	Protein Coding	Q8NBP7	59	GC01P055039	13.4095	https://www.genecards.org/cgi-bin/carddisp.pl?gene=PCSK9
ATL2	Atlastin GTPase 2	Protein Coding	Q8NHH9	45	GC02M038370	13.3934	https://www.genecards.org/cgi-bin/carddisp.pl?gene=ATL2
G6PC1	Glucose-6-Phosphatase Catalytic Subunit 1	Protein Coding	P35575	52	GC17P113706	13.3925	https://www.genecards.org/cgi-bin/carddisp.pl?gene=G6PC1
CACNA1C	Calcium Voltage-Gated Channel Subunit Alpha1 C	Protein Coding	Q13936	58	GC12P001970	13.3601	https://www.genecards.org/cgi-bin/carddisp.pl?gene=CACNA1C
SLC37A4	Solute Carrier Family 37 Member 4	Protein Coding	O43826	51	GC11M126542	13.3399	https://www.genecards.org/cgi-bin/carddisp.pl?gene=SLC37A4
TFG	Trafficking From ER To Golgi Regulator	Protein Coding	Q92734	51	GC03P100709	13.3371	https://www.genecards.org/cgi-bin/carddisp.pl?gene=TFG
CYB5A	Cytochrome B5 Type A	Protein Coding	P00167	52	GC18M074250	13.3344	https://www.genecards.org/cgi-bin/carddisp.pl?gene=CYB5A
RPN2	Ribophorin II	Protein Coding	P04844	48	GC20P037178	13.3321	https://www.genecards.org/cgi-bin/carddisp.pl?gene=RPN2
HSPD1	Heat Shock Protein Family D (Hsp60) Member 1	Protein Coding	P10809	58	GC02M197486	13.3218	https://www.genecards.org/cgi-bin/carddisp.pl?gene=HSPD1
COMT	Catechol-O-Methyltransferase	Protein Coding	P21964	60	GC22P019941	13.3091	https://www.genecards.org/cgi-bin/carddisp.pl?gene=COMT
PREB	Prolactin Regulatory Element Binding	Protein Coding	Q9HCU5	46	GC02M027130	13.2997	https://www.genecards.org/cgi-bin/carddisp.pl?gene=PREB
TMED10	Transmembrane P24 Trafficking Protein 10	Protein Coding	P49755	51	GC14M075251	13.2864	https://www.genecards.org/cgi-bin/carddisp.pl?gene=TMED10
GET1	Guided Entry Of Tail-Anchored Proteins Factor 1	Protein Coding	O00258	43	GC21P039377	13.2745	https://www.genecards.org/cgi-bin/carddisp.pl?gene=GET1
TMX3	Thioredoxin Related Transmembrane Protein 3	Protein Coding	Q96JJ7	46	GC18M068673	13.2708	https://www.genecards.org/cgi-bin/carddisp.pl?gene=TMX3
SGTA	Small Glutamine Rich Tetratricopeptide Repeat Co-Chaperone Alpha	Protein Coding	O43765	43	GC19M002754	13.2694	https://www.genecards.org/cgi-bin/carddisp.pl?gene=SGTA
GAPDH	Glyceraldehyde-3-Phosphate Dehydrogenase	Protein Coding	P04406	59	GC12P038965	13.2483	https://www.genecards.org/cgi-bin/carddisp.pl?gene=GAPDH
EDEM2	ER Degradation Enhancing Alpha-Mannosidase Like Protein 2	Protein Coding	Q9BV94	44	GC20M035115	13.2468	https://www.genecards.org/cgi-bin/carddisp.pl?gene=EDEM2
RNF185	Ring Finger Protein 185	Protein Coding	Q96GF1	40	GC22P031160	13.2367	https://www.genecards.org/cgi-bin/carddisp.pl?gene=RNF185
STX18	Syntaxin 18	Protein Coding	Q9P2W9	43	GC04M005115	13.2216	https://www.genecards.org/cgi-bin/carddisp.pl?gene=STX18
RETREG3	Reticulophagy Regulator Family Member 3	Protein Coding	Q86VR2	39	GC17M077730	13.2048	https://www.genecards.org/cgi-bin/carddisp.pl?gene=RETREG3
MDM2	MDM2 Proto-Oncogene	Protein Coding	Q00987	62	GC12P068808	13.2002	https://www.genecards.org/cgi-bin/carddisp.pl?gene=MDM2
NOTCH1	Notch Receptor 1	Protein Coding	P46531	61	GC09M138715	13.1706	https://www.genecards.org/cgi-bin/carddisp.pl?gene=NOTCH1
CYP2E1	Cytochrome P450 Family 2 Subfamily E Member 1	Protein Coding	P05181	55	GC10P133520	13.1644	https://www.genecards.org/cgi-bin/carddisp.pl?gene=CYP2E1
COPA	COPI Coat Complex Subunit Alpha	Protein Coding	P53621	51	GC01M160288	13.1381	https://www.genecards.org/cgi-bin/carddisp.pl?gene=COPA
GPX7	Glutathione Peroxidase 7	Protein Coding	Q96SL4	51	GC01P052602	13.1334	https://www.genecards.org/cgi-bin/carddisp.pl?gene=GPX7
CLN3	CLN3 Lysosomal/Endosomal Transmembrane Protein, Battenin	Protein Coding	Q13286	53	GC16M028466	13.1319	https://www.genecards.org/cgi-bin/carddisp.pl?gene=CLN3
BCL2L11	BCL2 Like 11	Protein Coding	O43521	53	GC02P111119	13.1257	https://www.genecards.org/cgi-bin/carddisp.pl?gene=BCL2L11
REEP5	Receptor Accessory Protein 5	Protein Coding	Q00765	48	GC05M112876	13.1205	https://www.genecards.org/cgi-bin/carddisp.pl?gene=REEP5
CBS	Cystathionine Beta-Synthase	Protein Coding	P35520	60	GC21M043053	13.1042	https://www.genecards.org/cgi-bin/carddisp.pl?gene=CBS
ALG1	ALG1 Chitobiosyldiphosphodolichol Beta-Mannosyltransferase	Protein Coding	Q9BT22	53	GC16P005033	13.0635	https://www.genecards.org/cgi-bin/carddisp.pl?gene=ALG1
TAP2	Transporter 2, ATP Binding Cassette Subfamily B Member	Protein Coding	Q03519	53	GC06M032821	13.0589	https://www.genecards.org/cgi-bin/carddisp.pl?gene=TAP2
HSPA1B	Heat Shock Protein Family A (Hsp70) Member 1B	Protein Coding	P0DMV9	46	GC06P134837	13.041	https://www.genecards.org/cgi-bin/carddisp.pl?gene=HSPA1B
BECN1	Beclin 1	Protein Coding	Q14457	55	GC17M042810	13.032	https://www.genecards.org/cgi-bin/carddisp.pl?gene=BECN1
FKRP	Fukutin Related Protein	Protein Coding	Q9H9S5	48	GC19P113296	12.9942	https://www.genecards.org/cgi-bin/carddisp.pl?gene=FKRP
OSBPL8	Oxysterol Binding Protein Like 8	Protein Coding	Q9BZF1	45	GC12M076354	12.9402	https://www.genecards.org/cgi-bin/carddisp.pl?gene=OSBPL8
RCN2	Reticulocalbin 2	Protein Coding	Q14257	47	GC15P076931	12.9363	https://www.genecards.org/cgi-bin/carddisp.pl?gene=RCN2
SAR1A	Secretion Associated Ras Related GTPase 1A	Protein Coding	Q9NR31	46	GC10M070147	12.9339	https://www.genecards.org/cgi-bin/carddisp.pl?gene=SAR1A
CASP7	Caspase 7	Protein Coding	P55210	58	GC10P113679	12.9321	https://www.genecards.org/cgi-bin/carddisp.pl?gene=CASP7
TECRL	Trans-2,3-Enoyl-CoA Reductase Like	Protein Coding	Q5HYJ1	44	GC04M064275	12.9313	https://www.genecards.org/cgi-bin/carddisp.pl?gene=TECRL
EDEM3	ER Degradation Enhancing Alpha-Mannosidase Like Protein 3	Protein Coding	Q9BZQ6	45	GC01M184690	12.922	https://www.genecards.org/cgi-bin/carddisp.pl?gene=EDEM3
SRC	SRC Proto-Oncogene, Non-Receptor Tyrosine Kinase	Protein Coding	P12931	60	GC20P037344	12.9197	https://www.genecards.org/cgi-bin/carddisp.pl?gene=SRC
USO1	USO1 Vesicle Transport Factor	Protein Coding	O60763	41	GC04P075724	12.9043	https://www.genecards.org/cgi-bin/carddisp.pl?gene=USO1
SHH	Sonic Hedgehog Signaling Molecule	Protein Coding	Q15465	59	GC07M155799	12.8702	https://www.genecards.org/cgi-bin/carddisp.pl?gene=SHH
PRKCD	Protein Kinase C Delta	Protein Coding	Q05655	60	GC03P053156	12.8318	https://www.genecards.org/cgi-bin/carddisp.pl?gene=PRKCD
MOSPD2	Motile Sperm Domain Containing 2	Protein Coding	Q8NHP6	42	GC0XP014891	12.8291	https://www.genecards.org/cgi-bin/carddisp.pl?gene=MOSPD2
CRP	C-Reactive Protein	Protein Coding	P02741	54	GC01M161311	12.8056	https://www.genecards.org/cgi-bin/carddisp.pl?gene=CRP
DHCR24	24-Dehydrocholesterol Reductase	Protein Coding	Q15392	53	GC01M054849	12.7725	https://www.genecards.org/cgi-bin/carddisp.pl?gene=DHCR24
SRPRA	SRP Receptor Subunit Alpha	Protein Coding	P08240	44	GC11M127864	12.76	https://www.genecards.org/cgi-bin/carddisp.pl?gene=SRPRA
BBC3	BCL2 Binding Component 3	Protein Coding	Q96PG8	49	GC19M047220	12.7581	https://www.genecards.org/cgi-bin/carddisp.pl?gene=BBC3
LDLR	Low Density Lipoprotein Receptor	Protein Coding	P01130	60	GC19P112317	12.731	https://www.genecards.org/cgi-bin/carddisp.pl?gene=LDLR
CSNK2A1	Casein Kinase 2 Alpha 1	Protein Coding	P68400	59	GC20M000472	12.7189	https://www.genecards.org/cgi-bin/carddisp.pl?gene=CSNK2A1
MAP2K6	Mitogen-Activated Protein Kinase Kinase 6	Protein Coding	P52564	55	GC17P069414	12.6638	https://www.genecards.org/cgi-bin/carddisp.pl?gene=MAP2K6
TG	Thyroglobulin	Protein Coding	P01266	53	GC08P132866	12.6456	https://www.genecards.org/cgi-bin/carddisp.pl?gene=TG
CYBA	Cytochrome B-245 Alpha Chain	Protein Coding	P13498	55	GC16M088643	12.6336	https://www.genecards.org/cgi-bin/carddisp.pl?gene=CYBA
RMRP	RNA Component Of Mitochondrial RNA Processing Endoribonuclease	RNA Gene		31	GC09M035655	12.623	https://www.genecards.org/cgi-bin/carddisp.pl?gene=RMRP
CALM3	Calmodulin 3	Protein Coding	P0DP25	51	GC19P046601	12.5976	https://www.genecards.org/cgi-bin/carddisp.pl?gene=CALM3
QRICH1	Glutamine Rich 1	Protein Coding	Q2TAL8	43	GC03M053712	12.5959	https://www.genecards.org/cgi-bin/carddisp.pl?gene=QRICH1
GSTP1	Glutathione S-Transferase Pi 1	Protein Coding	P09211	59	GC11P067583	12.5714	https://www.genecards.org/cgi-bin/carddisp.pl?gene=GSTP1
SDF2L1	Stromal Cell Derived Factor 2 Like 1	Protein Coding	Q9HCN8	40	GC22P070019	12.5655	https://www.genecards.org/cgi-bin/carddisp.pl?gene=SDF2L1
AQP11	Aquaporin 11	Protein Coding	Q8NBQ7	43	GC11P077589	12.5645	https://www.genecards.org/cgi-bin/carddisp.pl?gene=AQP11
ZDHHC6	Zinc Finger DHHC-Type Palmitoyltransferase 6	Protein Coding	Q9H6R6	41	GC10M112430	12.5578	https://www.genecards.org/cgi-bin/carddisp.pl?gene=ZDHHC6
GPX1	Glutathione Peroxidase 1	Protein Coding	P07203	51	GC03M053731	12.552	https://www.genecards.org/cgi-bin/carddisp.pl?gene=GPX1
PRDX2	Peroxiredoxin 2	Protein Coding	P32119	54	GC19M012796	12.5055	https://www.genecards.org/cgi-bin/carddisp.pl?gene=PRDX2
TMED7	Transmembrane P24 Trafficking Protein 7	Protein Coding	Q9Y3B3	41	GC05M115613	12.499	https://www.genecards.org/cgi-bin/carddisp.pl?gene=TMED7
RAB6A	RAB6A, Member RAS Oncogene Family	Protein Coding	P20340	50	GC11M125675	12.4965	https://www.genecards.org/cgi-bin/carddisp.pl?gene=RAB6A
SCD	Stearoyl-CoA Desaturase	Protein Coding	O00767	59	GC10P100347	12.4523	https://www.genecards.org/cgi-bin/carddisp.pl?gene=SCD
TMEM117	Transmembrane Protein 117	Protein Coding	Q9H0C3	36	GC12P043795	12.4263	https://www.genecards.org/cgi-bin/carddisp.pl?gene=TMEM117
PRDX1	Peroxiredoxin 1	Protein Coding	Q06830	58	GC01M045753	12.4019	https://www.genecards.org/cgi-bin/carddisp.pl?gene=PRDX1
MOGS	Mannosyl-Oligosaccharide Glucosidase	Protein Coding	Q13724	51	GC02M074461	12.3916	https://www.genecards.org/cgi-bin/carddisp.pl?gene=MOGS
CYBB	Cytochrome B-245 Beta Chain	Protein Coding	P04839	58	GC0XP037780	12.3818	https://www.genecards.org/cgi-bin/carddisp.pl?gene=CYBB
PTGIS	Prostaglandin I2 Synthase	Protein Coding	Q16647	53	GC20M049503	12.3658	https://www.genecards.org/cgi-bin/carddisp.pl?gene=PTGIS
HLA-A	Major Histocompatibility Complex, Class I, A	Protein Coding	P04439	54	GC06P134779	12.3622	https://www.genecards.org/cgi-bin/carddisp.pl?gene=HLA-A
TMED9	Transmembrane P24 Trafficking Protein 9	Protein Coding	Q9BVK6	40	GC05P186666	12.3565	https://www.genecards.org/cgi-bin/carddisp.pl?gene=TMED9
TIA1	TIA1 Cytotoxic Granule Associated RNA Binding Protein	Protein Coding	P31483	51	GC02M070209	12.3466	https://www.genecards.org/cgi-bin/carddisp.pl?gene=TIA1
PKD2	Polycystin 2, Transient Receptor Potential Cation Channel	Protein Coding	Q13563	57	GC04P088007	12.3179	https://www.genecards.org/cgi-bin/carddisp.pl?gene=PKD2
MICB	MHC Class I Polypeptide-Related Sequence B	Protein Coding	Q29980	49	GC06P134815	12.3079	https://www.genecards.org/cgi-bin/carddisp.pl?gene=MICB
NPC1	NPC Intracellular Cholesterol Transporter 1	Protein Coding	O15118	59	GC18M023506	12.3029	https://www.genecards.org/cgi-bin/carddisp.pl?gene=NPC1
HTT	Huntingtin	Protein Coding	P42858	53	GC04P003041	12.2943	https://www.genecards.org/cgi-bin/carddisp.pl?gene=HTT
PDZD8	PDZ Domain Containing 8	Protein Coding	Q8NEN9	45	GC10M117277	12.2933	https://www.genecards.org/cgi-bin/carddisp.pl?gene=PDZD8
PPARG	Peroxisome Proliferator Activated Receptor Gamma	Protein Coding	P37231	61	GC03P012287	12.2924	https://www.genecards.org/cgi-bin/carddisp.pl?gene=PPARG
HSPA13	Heat Shock Protein Family A (Hsp70) Member 13	Protein Coding	P48723	44	GC21M015388	12.2913	https://www.genecards.org/cgi-bin/carddisp.pl?gene=HSPA13
UGT1A1	UDP Glucuronosyltransferase Family 1 Member A1	Protein Coding	P22309	59	GC02P233760	12.2864	https://www.genecards.org/cgi-bin/carddisp.pl?gene=UGT1A1
ESR1	Estrogen Receptor 1	Protein Coding	P03372	62	GC06P151656	12.2778	https://www.genecards.org/cgi-bin/carddisp.pl?gene=ESR1
YIF1A	Yip1 Interacting Factor Homolog A, Membrane Trafficking Protein	Protein Coding	O95070	43	GC11M125432	12.2585	https://www.genecards.org/cgi-bin/carddisp.pl?gene=YIF1A
UBE2G2	Ubiquitin Conjugating Enzyme E2 G2	Protein Coding	P60604	50	GC21M044768	12.2525	https://www.genecards.org/cgi-bin/carddisp.pl?gene=UBE2G2
TMEM208	Transmembrane Protein 208	Protein Coding	Q9BTX3	37	GC16P082816	12.2388	https://www.genecards.org/cgi-bin/carddisp.pl?gene=TMEM208
CYP1A1	Cytochrome P450 Family 1 Subfamily A Member 1	Protein Coding	P04798	56	GC15M074719	12.1872	https://www.genecards.org/cgi-bin/carddisp.pl?gene=CYP1A1
CREBRF	CREB3 Regulatory Factor	Protein Coding	Q8IUR6	39	GC05P173056	12.1846	https://www.genecards.org/cgi-bin/carddisp.pl?gene=CREBRF
MAP1LC3B	Microtubule Associated Protein 1 Light Chain 3 Beta	Protein Coding	Q9GZQ8	50	GC16P095222	12.1799	https://www.genecards.org/cgi-bin/carddisp.pl?gene=MAP1LC3B
TMCC1	Transmembrane And Coiled-Coil Domain Family 1	Protein Coding	O94876	40	GC03M129647	12.1724	https://www.genecards.org/cgi-bin/carddisp.pl?gene=TMCC1
TMEM214	Transmembrane Protein 214	Protein Coding	Q6NUQ4	40	GC02P027032	12.1609	https://www.genecards.org/cgi-bin/carddisp.pl?gene=TMEM214
LMAN2L	Lectin, Mannose Binding 2 Like	Protein Coding	Q9H0V9	50	GC02M100859	12.1213	https://www.genecards.org/cgi-bin/carddisp.pl?gene=LMAN2L
IER3IP1	Immediate Early Response 3 Interacting Protein 1	Protein Coding	Q9Y5U9	43	GC18M047152	12.1181	https://www.genecards.org/cgi-bin/carddisp.pl?gene=IER3IP1
EIF2B5	Eukaryotic Translation Initiation Factor 2B Subunit Epsilon	Protein Coding	Q13144	51	GC03P184135	12.1121	https://www.genecards.org/cgi-bin/carddisp.pl?gene=EIF2B5
PPP1CA	Protein Phosphatase 1 Catalytic Subunit Alpha	Protein Coding	P62136	55	GC11M125495	12.11	https://www.genecards.org/cgi-bin/carddisp.pl?gene=PPP1CA
EMC10	ER Membrane Protein Complex Subunit 10	Protein Coding	Q5UCC4	44	GC19P050476	12.1028	https://www.genecards.org/cgi-bin/carddisp.pl?gene=EMC10
HRC	Histidine Rich Calcium Binding Protein	Protein Coding	P23327	45	GC19M049151	12.0924	https://www.genecards.org/cgi-bin/carddisp.pl?gene=HRC
MYC	MYC Proto-Oncogene, BHLH Transcription Factor	Protein Coding	P01106	61	GC08P127735	12.0778	https://www.genecards.org/cgi-bin/carddisp.pl?gene=MYC
TRC-GCA24-1	TRNA-Cys (GCA) 24-1	RNA Gene		11	GC17M077502	12.0768	https://www.genecards.org/cgi-bin/carddisp.pl?gene=TRC-GCA24-1
CLCC1	Chloride Channel CLIC Like 1	Protein Coding	Q96S66	45	GC01M108881	12.0687	https://www.genecards.org/cgi-bin/carddisp.pl?gene=CLCC1
AUP1	AUP1 Lipid Droplet Regulating VLDL Assembly Factor	Protein Coding	Q9Y679	41	GC02M074526	12.0551	https://www.genecards.org/cgi-bin/carddisp.pl?gene=AUP1
SRP68	Signal Recognition Particle 68	Protein Coding	Q9UHB9	46	GC17M076038	12.0499	https://www.genecards.org/cgi-bin/carddisp.pl?gene=SRP68
MFN2	Mitofusin 2	Protein Coding	O95140	57	GC01P011980	12.0491	https://www.genecards.org/cgi-bin/carddisp.pl?gene=MFN2
MAP2K7	Mitogen-Activated Protein Kinase Kinase 7	Protein Coding	O14733	55	GC19P007903	12.0443	https://www.genecards.org/cgi-bin/carddisp.pl?gene=MAP2K7
FAM20C	FAM20C Golgi Associated Secretory Pathway Kinase	Protein Coding	Q8IXL6	53	GC07P000192	12.0431	https://www.genecards.org/cgi-bin/carddisp.pl?gene=FAM20C
PIK3CG	Phosphatidylinositol-4,5-Bisphosphate 3-Kinase Catalytic Subunit Gamma	Protein Coding	P48736	58	GC07P106865	12.0364	https://www.genecards.org/cgi-bin/carddisp.pl?gene=PIK3CG
RAB10	RAB10, Member RAS Oncogene Family	Protein Coding	P61026	50	GC02P026033	12.0278	https://www.genecards.org/cgi-bin/carddisp.pl?gene=RAB10
TOR1B	Torsin Family 1 Member B	Protein Coding	O14657	47	GC09P129803	12.0257	https://www.genecards.org/cgi-bin/carddisp.pl?gene=TOR1B
AIFM1	Apoptosis Inducing Factor Mitochondria Associated 1	Protein Coding	O95831	59	GC0XM130129	12.0233	https://www.genecards.org/cgi-bin/carddisp.pl?gene=AIFM1
PIEZO1	Piezo Type Mechanosensitive Ion Channel Component 1 (Er Blood Group)	Protein Coding	Q92508	48	GC16M088715	12.0166	https://www.genecards.org/cgi-bin/carddisp.pl?gene=PIEZO1
NPY	Neuropeptide Y	Protein Coding	P01303	53	GC07P024290	12.007	https://www.genecards.org/cgi-bin/carddisp.pl?gene=NPY
INPP5K	Inositol Polyphosphate-5-Phosphatase K	Protein Coding	Q9BT40	51	GC17M001494	12.001	https://www.genecards.org/cgi-bin/carddisp.pl?gene=INPP5K
SEC23IP	SEC23 Interacting Protein	Protein Coding	Q9Y6Y8	47	GC10P119892	12.0008	https://www.genecards.org/cgi-bin/carddisp.pl?gene=SEC23IP
DNAJB14	DnaJ Heat Shock Protein Family (Hsp40) Member B14	Protein Coding	Q8TBM8	38	GC04M099896	11.9964	https://www.genecards.org/cgi-bin/carddisp.pl?gene=DNAJB14
UMOD	Uromodulin	Protein Coding	P07911	51	GC16M021309	11.9893	https://www.genecards.org/cgi-bin/carddisp.pl?gene=UMOD
RNF139	Ring Finger Protein 139	Protein Coding	Q8WU17	46	GC08P124474	11.9748	https://www.genecards.org/cgi-bin/carddisp.pl?gene=RNF139
DNAJB12	DnaJ Heat Shock Protein Family (Hsp40) Member B12	Protein Coding	Q9NXW2	45	GC10M072332	11.9661	https://www.genecards.org/cgi-bin/carddisp.pl?gene=DNAJB12
UBAC2	UBA Domain Containing 2	Protein Coding	Q8NBM4	45	GC13P099200	11.9532	https://www.genecards.org/cgi-bin/carddisp.pl?gene=UBAC2
HM13	Histocompatibility Minor 13	Protein Coding	Q8TCT9	46	GC20P031514	11.9425	https://www.genecards.org/cgi-bin/carddisp.pl?gene=HM13
CCDC88B	Coiled-Coil Domain Containing 88B	Protein Coding	A6NC98	36	GC11P064340	11.928	https://www.genecards.org/cgi-bin/carddisp.pl?gene=CCDC88B
SCAMP5	Secretory Carrier Membrane Protein 5	Protein Coding	Q8TAC9	41	GC15P074957	11.9219	https://www.genecards.org/cgi-bin/carddisp.pl?gene=SCAMP5
THBS1	Thrombospondin 1	Protein Coding	P07996	54	GC15P039581	11.8966	https://www.genecards.org/cgi-bin/carddisp.pl?gene=THBS1
UGT1A6	UDP Glucuronosyltransferase Family 1 Member A6	Protein Coding	P19224	51	GC02P233691	11.8854	https://www.genecards.org/cgi-bin/carddisp.pl?gene=UGT1A6
CALM2	Calmodulin 2	Protein Coding	P0DP24	53	GC02M047160	11.8828	https://www.genecards.org/cgi-bin/carddisp.pl?gene=CALM2
TMTC3	Transmembrane O-Mannosyltransferase Targeting Cadherins 3	Protein Coding	Q6ZXV5	44	GC12P088142	11.8639	https://www.genecards.org/cgi-bin/carddisp.pl?gene=TMTC3
IL1A	Interleukin 1 Alpha	Protein Coding	P01583	54	GC02M112773	11.8611	https://www.genecards.org/cgi-bin/carddisp.pl?gene=IL1A
AGER	Advanced Glycosylation End-Product Specific Receptor	Protein Coding	Q15109	55	GC06M032180	11.8568	https://www.genecards.org/cgi-bin/carddisp.pl?gene=AGER
ATR	ATR Serine/Threonine Kinase	Protein Coding	Q13535	62	GC03M142449	11.8467	https://www.genecards.org/cgi-bin/carddisp.pl?gene=ATR
VIM	Vimentin	Protein Coding	P08670	60	GC10P017227	11.8459	https://www.genecards.org/cgi-bin/carddisp.pl?gene=VIM
RNFT1	Ring Finger Protein, Transmembrane 1	Protein Coding	Q5M7Z0	41	GC17M059952	11.8423	https://www.genecards.org/cgi-bin/carddisp.pl?gene=RNFT1
PRDX6	Peroxiredoxin 6	Protein Coding	P30041	54	GC01P173477	11.8277	https://www.genecards.org/cgi-bin/carddisp.pl?gene=PRDX6
EMD	Emerin	Protein Coding	P50402	54	GC0XP154379	11.826	https://www.genecards.org/cgi-bin/carddisp.pl?gene=EMD
STAT3	Signal Transducer And Activator Of Transcription 3	Protein Coding	P40763	62	GC17M042313	11.8129	https://www.genecards.org/cgi-bin/carddisp.pl?gene=STAT3
EMC1	ER Membrane Protein Complex Subunit 1	Protein Coding	Q8N766	47	GC01M019215	11.7685	https://www.genecards.org/cgi-bin/carddisp.pl?gene=EMC1
SLC8A1	Solute Carrier Family 8 Member A1	Protein Coding	P32418	53	GC02M040078	11.7679	https://www.genecards.org/cgi-bin/carddisp.pl?gene=SLC8A1
ACE	Angiotensin I Converting Enzyme	Protein Coding	P12821	60	GC17P063477	11.7579	https://www.genecards.org/cgi-bin/carddisp.pl?gene=ACE
MAPK13	Mitogen-Activated Protein Kinase 13	Protein Coding	O15264	55	GC06P134978	11.756	https://www.genecards.org/cgi-bin/carddisp.pl?gene=MAPK13
MIR211	MicroRNA 211	RNA Gene		29	GC15M031065	11.7514	https://www.genecards.org/cgi-bin/carddisp.pl?gene=MIR211
SEC23B	SEC23 Homolog B, COPII Coat Complex Component	Protein Coding	Q15437	50	GC20P018507	11.7376	https://www.genecards.org/cgi-bin/carddisp.pl?gene=SEC23B
IFNG	Interferon Gamma	Protein Coding	P01579	59	GC12M068154	11.7354	https://www.genecards.org/cgi-bin/carddisp.pl?gene=IFNG
MIR320A	MicroRNA 320a	RNA Gene		29	GC08M022306	11.7304	https://www.genecards.org/cgi-bin/carddisp.pl?gene=MIR320A
TOR1AIP2	Torsin 1A Interacting Protein 2	Protein Coding	Q9H496	42	GC01M185756	11.7265	https://www.genecards.org/cgi-bin/carddisp.pl?gene=TOR1AIP2
AHCYL1	Adenosylhomocysteinase Like 1	Protein Coding	O43865	51	GC01P109984	11.7038	https://www.genecards.org/cgi-bin/carddisp.pl?gene=AHCYL1
CD4	CD4 Molecule	Protein Coding	P01730	59	GC12P006786	11.7005	https://www.genecards.org/cgi-bin/carddisp.pl?gene=CD4
MAP1LC3A	Microtubule Associated Protein 1 Light Chain 3 Alpha	Protein Coding	Q9H492	48	GC20P034546	11.6987	https://www.genecards.org/cgi-bin/carddisp.pl?gene=MAP1LC3A
GJA1	Gap Junction Protein Alpha 1	Protein Coding	P17302	59	GC06P136245	11.6938	https://www.genecards.org/cgi-bin/carddisp.pl?gene=GJA1
KTN1	Kinectin 1	Protein Coding	Q86UP2	48	GC14P055559	11.6887	https://www.genecards.org/cgi-bin/carddisp.pl?gene=KTN1
CAMLG	Calcium Modulating Ligand	Protein Coding	P49069	48	GC05P134738	11.6857	https://www.genecards.org/cgi-bin/carddisp.pl?gene=CAMLG
TRIM13	Tripartite Motif Containing 13	Protein Coding	O60858	44	GC13P049995	11.679	https://www.genecards.org/cgi-bin/carddisp.pl?gene=TRIM13
PTEN	Phosphatase And Tensin Homolog	Protein Coding	P60484	61	GC10P109367	11.6698	https://www.genecards.org/cgi-bin/carddisp.pl?gene=PTEN
TRIB3	Tribbles Pseudokinase 3	Protein Coding	Q96RU7	50	GC20P000365	11.667	https://www.genecards.org/cgi-bin/carddisp.pl?gene=TRIB3
RHOA	Ras Homolog Family Member A	Protein Coding	P61586	59	GC03M049359	11.6574	https://www.genecards.org/cgi-bin/carddisp.pl?gene=RHOA
CASP12	Caspase 12 (Gene/Pseudogene)	Protein Coding	Q6UXS9	37	GC11M126231	11.6524	https://www.genecards.org/cgi-bin/carddisp.pl?gene=CASP12
HLA-DRB1	Major Histocompatibility Complex, Class II, DR Beta 1	Protein Coding	P01911	55	GC06M093834	11.6474	https://www.genecards.org/cgi-bin/carddisp.pl?gene=HLA-DRB1
OXT	Oxytocin/Neurophysin I Prepropeptide	Protein Coding	P01178	47	GC20P008141	11.6314	https://www.genecards.org/cgi-bin/carddisp.pl?gene=OXT
JKAMP	JNK1/MAPK8 Associated Membrane Protein	Protein Coding	Q9P055	41	GC14P059484	11.5908	https://www.genecards.org/cgi-bin/carddisp.pl?gene=JKAMP
GPX8	Glutathione Peroxidase 8 (Putative)	Protein Coding	Q8TED1	47	GC05P055160	11.5864	https://www.genecards.org/cgi-bin/carddisp.pl?gene=GPX8
ITPR3	Inositol 1,4,5-Trisphosphate Receptor Type 3	Protein Coding	Q14573	55	GC06P033620	11.5833	https://www.genecards.org/cgi-bin/carddisp.pl?gene=ITPR3
AGR2	Anterior Gradient 2, Protein Disulphide Isomerase Family Member	Protein Coding	O95994	47	GC07M017413	11.5674	https://www.genecards.org/cgi-bin/carddisp.pl?gene=AGR2
CAST	Calpastatin	Protein Coding	P20810	56	GC05P095975	11.5379	https://www.genecards.org/cgi-bin/carddisp.pl?gene=CAST
MAP2K1	Mitogen-Activated Protein Kinase Kinase 1	Protein Coding	Q02750	63	GC15P066386	11.5295	https://www.genecards.org/cgi-bin/carddisp.pl?gene=MAP2K1
CDKN3	Cyclin Dependent Kinase Inhibitor 3	Protein Coding	Q16667	51	GC14P054398	11.5132	https://www.genecards.org/cgi-bin/carddisp.pl?gene=CDKN3
TTR	Transthyretin	Protein Coding	P02766	57	GC18P031557	11.504	https://www.genecards.org/cgi-bin/carddisp.pl?gene=TTR
SP1	Sp1 Transcription Factor	Protein Coding	P08047	55	GC12P053380	11.4521	https://www.genecards.org/cgi-bin/carddisp.pl?gene=SP1
MTTP	Microsomal Triglyceride Transfer Protein	Protein Coding	P55157	53	GC04P099563	11.4424	https://www.genecards.org/cgi-bin/carddisp.pl?gene=MTTP
P3H1	Prolyl 3-Hydroxylase 1	Protein Coding	Q32P28	50	GC01M042746	11.4262	https://www.genecards.org/cgi-bin/carddisp.pl?gene=P3H1
HSP90AB1	Heat Shock Protein 90 Alpha Family Class B Member 1	Protein Coding	P08238	58	GC06P044246	11.408	https://www.genecards.org/cgi-bin/carddisp.pl?gene=HSP90AB1
GAS5	Growth Arrest Specific 5	RNA Gene		31	GC01M173947	11.406	https://www.genecards.org/cgi-bin/carddisp.pl?gene=GAS5
LINC02605	Long Intergenic Non-Protein Coding RNA 2605	RNA Gene		18	GC08P078838	11.4047	https://www.genecards.org/cgi-bin/carddisp.pl?gene=LINC02605
POGLUT2	Protein O-Glucosyltransferase 2	Protein Coding	Q6UW63	40	GC13M102785	11.4013	https://www.genecards.org/cgi-bin/carddisp.pl?gene=POGLUT2
CASP2	Caspase 2	Protein Coding	P42575	55	GC07P157914	11.3561	https://www.genecards.org/cgi-bin/carddisp.pl?gene=CASP2
ALG2	ALG2 Alpha-1,3/1,6-Mannosyltransferase	Protein Coding	Q9H553	50	GC09M099216	11.3526	https://www.genecards.org/cgi-bin/carddisp.pl?gene=ALG2
SPAST	Spastin	Protein Coding	Q9UBP0	51	GC02P032063	11.3463	https://www.genecards.org/cgi-bin/carddisp.pl?gene=SPAST
STARD3	StAR Related Lipid Transfer Domain Containing 3	Protein Coding	Q14849	49	GC17P039637	11.3302	https://www.genecards.org/cgi-bin/carddisp.pl?gene=STARD3
PACS2	Phosphofurin Acidic Cluster Sorting Protein 2	Protein Coding	Q86VP3	47	GC14P105300	11.3287	https://www.genecards.org/cgi-bin/carddisp.pl?gene=PACS2
APEX1	Apurinic/Apyrimidinic Endodeoxyribonuclease 1	Protein Coding	P27695	54	GC14P020455	11.325	https://www.genecards.org/cgi-bin/carddisp.pl?gene=APEX1
ALDH3A2	Aldehyde Dehydrogenase 3 Family Member A2	Protein Coding	P51648	54	GC17P019648	11.3217	https://www.genecards.org/cgi-bin/carddisp.pl?gene=ALDH3A2
KNG1	Kininogen 1	Protein Coding	P01042	56	GC03P186717	11.3214	https://www.genecards.org/cgi-bin/carddisp.pl?gene=KNG1
IL10	Interleukin 10	Protein Coding	P22301	56	GC01M206767	11.3188	https://www.genecards.org/cgi-bin/carddisp.pl?gene=IL10
HFE	Homeostatic Iron Regulator	Protein Coding	Q30201	54	GC06P026087	11.2989	https://www.genecards.org/cgi-bin/carddisp.pl?gene=HFE
PRDX3	Peroxiredoxin 3	Protein Coding	P30048	51	GC10M119167	11.2956	https://www.genecards.org/cgi-bin/carddisp.pl?gene=PRDX3
TRIM21	Tripartite Motif Containing 21	Protein Coding	P19474	52	GC11M004384	11.2846	https://www.genecards.org/cgi-bin/carddisp.pl?gene=TRIM21
USE1	Unconventional SNARE In The ER 1	Protein Coding	Q9NZ43	42	GC19P112606	11.2654	https://www.genecards.org/cgi-bin/carddisp.pl?gene=USE1
DSP	Desmoplakin	Protein Coding	P15924	59	GC06P007541	11.2609	https://www.genecards.org/cgi-bin/carddisp.pl?gene=DSP
RNY5	RNA, Ro60-Associated Y5	RNA Gene		17	GC07P148941	11.248	https://www.genecards.org/cgi-bin/carddisp.pl?gene=RNY5
HCRT	Hypocretin Neuropeptide Precursor	Protein Coding	O43612	48	GC17M077709	11.2427	https://www.genecards.org/cgi-bin/carddisp.pl?gene=HCRT
GSTM1	Glutathione S-Transferase Mu 1	Protein Coding	P09488	51	GC01P109687	11.2384	https://www.genecards.org/cgi-bin/carddisp.pl?gene=GSTM1
MAP2K4	Mitogen-Activated Protein Kinase Kinase 4	Protein Coding	P45985	56	GC17P012020	11.2182	https://www.genecards.org/cgi-bin/carddisp.pl?gene=MAP2K4
CAMK2G	Calcium/Calmodulin Dependent Protein Kinase II Gamma	Protein Coding	Q13555	58	GC10M073812	11.2062	https://www.genecards.org/cgi-bin/carddisp.pl?gene=CAMK2G
TRP-AGG2-5	TRNA-Pro (Anticodon AGG) 2-5	RNA Gene		17	GC14M026908	11.1997	https://www.genecards.org/cgi-bin/carddisp.pl?gene=TRP-AGG2-5
MAOA	Monoamine Oxidase A	Protein Coding	P21397	58	GC0XP043654	11.172	https://www.genecards.org/cgi-bin/carddisp.pl?gene=MAOA
EEF1A1	Eukaryotic Translation Elongation Factor 1 Alpha 1	Protein Coding	P68104	52	GC06M094314	11.1716	https://www.genecards.org/cgi-bin/carddisp.pl?gene=EEF1A1
CLN8	CLN8 Transmembrane ER And ERGIC Protein	Protein Coding	Q9UBY8	50	GC08P001755	11.1686	https://www.genecards.org/cgi-bin/carddisp.pl?gene=CLN8
EP300	E1A Binding Protein P300	Protein Coding	Q09472	61	GC22P070686	11.1624	https://www.genecards.org/cgi-bin/carddisp.pl?gene=EP300
OSBP	Oxysterol Binding Protein	Protein Coding	P22059	48	GC11M125109	11.1397	https://www.genecards.org/cgi-bin/carddisp.pl?gene=OSBP
VCAM1	Vascular Cell Adhesion Molecule 1	Protein Coding	P19320	55	GC01P100719	11.1327	https://www.genecards.org/cgi-bin/carddisp.pl?gene=VCAM1
EDN1	Endothelin 1	Protein Coding	P05305	58	GC06P012236	11.1308	https://www.genecards.org/cgi-bin/carddisp.pl?gene=EDN1
CDK1	Cyclin Dependent Kinase 1	Protein Coding	P06493	56	GC10P060772	11.1004	https://www.genecards.org/cgi-bin/carddisp.pl?gene=CDK1
PPP1R15B	Protein Phosphatase 1 Regulatory Subunit 15B	Protein Coding	Q5SWA1	46	GC01M204666	11.0973	https://www.genecards.org/cgi-bin/carddisp.pl?gene=PPP1R15B
CLN6	CLN6 Transmembrane ER Protein	Protein Coding	Q9NWW5	47	GC15M068206	11.0823	https://www.genecards.org/cgi-bin/carddisp.pl?gene=CLN6
CDKN2A	Cyclin Dependent Kinase Inhibitor 2A	Protein Coding	Q8N726	60	GC09M021967	11.0687	https://www.genecards.org/cgi-bin/carddisp.pl?gene=CDKN2A
RYR3	Ryanodine Receptor 3	Protein Coding	Q15413	50	GC15P033310	11.0671	https://www.genecards.org/cgi-bin/carddisp.pl?gene=RYR3
ANXA5	Annexin A5	Protein Coding	P08758	56	GC04M121667	11.0507	https://www.genecards.org/cgi-bin/carddisp.pl?gene=ANXA5
DHCR7	7-Dehydrocholesterol Reductase	Protein Coding	Q9UBM7	56	GC11M071428	11.0416	https://www.genecards.org/cgi-bin/carddisp.pl?gene=DHCR7
CUL3	Cullin 3	Protein Coding	Q13618	57	GC02M224470	11.0349	https://www.genecards.org/cgi-bin/carddisp.pl?gene=CUL3
DMPK	DM1 Protein Kinase	Protein Coding	Q09013	56	GC19M045769	11.0346	https://www.genecards.org/cgi-bin/carddisp.pl?gene=DMPK
MZB1	Marginal Zone B And B1 Cell Specific Protein	Protein Coding	Q8WU39	41	GC05M139387	11.0193	https://www.genecards.org/cgi-bin/carddisp.pl?gene=MZB1
GABARAPL2	GABA Type A Receptor Associated Protein Like 2	Protein Coding	P60520	51	GC16P075566	11.0145	https://www.genecards.org/cgi-bin/carddisp.pl?gene=GABARAPL2
FMR1	Fragile X Messenger Ribonucleoprotein 1	Protein Coding	Q06787	53	GC0XP148000	10.9988	https://www.genecards.org/cgi-bin/carddisp.pl?gene=FMR1
IGF1	Insulin Like Growth Factor 1	Protein Coding	P05019	57	GC12M102395	10.9977	https://www.genecards.org/cgi-bin/carddisp.pl?gene=IGF1
UGGT2	UDP-Glucose Glycoprotein Glucosyltransferase 2	Protein Coding	Q9NYU1	46	GC13M095801	10.9777	https://www.genecards.org/cgi-bin/carddisp.pl?gene=UGGT2
MICA	MHC Class I Polypeptide-Related Sequence A	Protein Coding	Q29983	47	GC06P031399	10.965	https://www.genecards.org/cgi-bin/carddisp.pl?gene=MICA
PIK3R1	Phosphoinositide-3-Kinase Regulatory Subunit 1	Protein Coding	P27986	60	GC05P068215	10.9617	https://www.genecards.org/cgi-bin/carddisp.pl?gene=PIK3R1
STAU1	Staufen Double-Stranded RNA Binding Protein 1	Protein Coding	O95793	47	GC20M049113	10.9462	https://www.genecards.org/cgi-bin/carddisp.pl?gene=STAU1
CSNK2B	Casein Kinase 2 Beta	Protein Coding	P67870	57	GC06P134823	10.9224	https://www.genecards.org/cgi-bin/carddisp.pl?gene=CSNK2B
PPARGC1A	PPARG Coactivator 1 Alpha	Protein Coding	Q9UBK2	55	GC04M023755	10.9195	https://www.genecards.org/cgi-bin/carddisp.pl?gene=PPARGC1A
VHL	Von Hippel-Lindau Tumor Suppressor	Protein Coding	P40337	56	GC03P021526	10.8859	https://www.genecards.org/cgi-bin/carddisp.pl?gene=VHL
BRCA1	BRCA1 DNA Repair Associated	Protein Coding	P38398	59	GC17M043044	10.8847	https://www.genecards.org/cgi-bin/carddisp.pl?gene=BRCA1
RINT1	RAD50 Interactor 1	Protein Coding	Q6NUQ1	47	GC07P105532	10.8777	https://www.genecards.org/cgi-bin/carddisp.pl?gene=RINT1
FN1	Fibronectin 1	Protein Coding	P02751	59	GC02M215360	10.8714	https://www.genecards.org/cgi-bin/carddisp.pl?gene=FN1
ORMDL3	ORMDL Sphingolipid Biosynthesis Regulator 3	Protein Coding	Q8N138	46	GC17M039921	10.8365	https://www.genecards.org/cgi-bin/carddisp.pl?gene=ORMDL3
ICMT	Isoprenylcysteine Carboxyl Methyltransferase	Protein Coding	O60725	48	GC01M014311	10.8263	https://www.genecards.org/cgi-bin/carddisp.pl?gene=ICMT
STT3A	STT3 Oligosaccharyltransferase Complex Catalytic Subunit A	Protein Coding	P46977	52	GC11P125592	10.8196	https://www.genecards.org/cgi-bin/carddisp.pl?gene=STT3A
BET1	Bet1 Golgi Vesicular Membrane Trafficking Protein	Protein Coding	O15155	43	GC07M093962	10.8179	https://www.genecards.org/cgi-bin/carddisp.pl?gene=BET1
SLC2A1	Solute Carrier Family 2 Member 1	Protein Coding	P11166	62	GC01M042925	10.8049	https://www.genecards.org/cgi-bin/carddisp.pl?gene=SLC2A1
TF	Transferrin	Protein Coding	P02787	59	GC03P139072	10.8044	https://www.genecards.org/cgi-bin/carddisp.pl?gene=TF
PON2	Paraoxonase 2	Protein Coding	Q15165	52	GC07M095404	10.7997	https://www.genecards.org/cgi-bin/carddisp.pl?gene=PON2
EMC7	ER Membrane Protein Complex Subunit 7	Protein Coding	Q9NPA0	38	GC15M034084	10.7939	https://www.genecards.org/cgi-bin/carddisp.pl?gene=EMC7
HSD11B1	Hydroxysteroid 11-Beta Dehydrogenase 1	Protein Coding	P28845	59	GC01P209686	10.7913	https://www.genecards.org/cgi-bin/carddisp.pl?gene=HSD11B1
CAPN3	Calpain 3	Protein Coding	P20807	56	GC15P042359	10.7892	https://www.genecards.org/cgi-bin/carddisp.pl?gene=CAPN3
RAC1	Rac Family Small GTPase 1	Protein Coding	P63000	58	GC07P011586	10.7731	https://www.genecards.org/cgi-bin/carddisp.pl?gene=RAC1
PCSK1	Proprotein Convertase Subtilisin/Kexin Type 1	Protein Coding	P29120	59	GC05M096391	10.7648	https://www.genecards.org/cgi-bin/carddisp.pl?gene=PCSK1
KCNE1	Potassium Voltage-Gated Channel Subfamily E Regulatory Subunit 1	Protein Coding	P15382	54	GC21M034446	10.7624	https://www.genecards.org/cgi-bin/carddisp.pl?gene=KCNE1
KCNJ11	Potassium Inwardly Rectifying Channel Subfamily J Member 11	Protein Coding	Q14654	54	GC11M017948	10.7545	https://www.genecards.org/cgi-bin/carddisp.pl?gene=KCNJ11
TMX2	Thioredoxin Related Transmembrane Protein 2	Protein Coding	Q9Y320	46	GC11P058682	10.745	https://www.genecards.org/cgi-bin/carddisp.pl?gene=TMX2
GRIA1	Glutamate Ionotropic Receptor AMPA Type Subunit 1	Protein Coding	P42261	58	GC05P153489	10.7342	https://www.genecards.org/cgi-bin/carddisp.pl?gene=GRIA1
SMPD4	Sphingomyelin Phosphodiesterase 4	Protein Coding	Q9NXE4	48	GC02M130151	10.7148	https://www.genecards.org/cgi-bin/carddisp.pl?gene=SMPD4
REEP4	Receptor Accessory Protein 4	Protein Coding	Q9H6H4	43	GC08M022138	10.7102	https://www.genecards.org/cgi-bin/carddisp.pl?gene=REEP4
EMC2	ER Membrane Protein Complex Subunit 2	Protein Coding	Q15006	41	GC08P108443	10.7081	https://www.genecards.org/cgi-bin/carddisp.pl?gene=EMC2
GANAB	Glucosidase II Alpha Subunit	Protein Coding	Q14697	54	GC11M125242	10.6874	https://www.genecards.org/cgi-bin/carddisp.pl?gene=GANAB
YIF1B	Yip1 Interacting Factor Homolog B, Membrane Trafficking Protein	Protein Coding	Q5BJH7	45	GC19M038303	10.6821	https://www.genecards.org/cgi-bin/carddisp.pl?gene=YIF1B
JPH4	Junctophilin 4	Protein Coding	Q96JJ6	40	GC14M023568	10.6495	https://www.genecards.org/cgi-bin/carddisp.pl?gene=JPH4
PRDX5	Peroxiredoxin 5	Protein Coding	P30044	53	GC11P088959	10.6489	https://www.genecards.org/cgi-bin/carddisp.pl?gene=PRDX5
UBA52	Ubiquitin A-52 Residue Ribosomal Protein Fusion Product 1	Protein Coding	P62987	44	GC19P018563	10.6405	https://www.genecards.org/cgi-bin/carddisp.pl?gene=UBA52
NUPR1	Nuclear Protein 1, Transcriptional Regulator	Protein Coding	O60356	38	GC16M028532	10.6358	https://www.genecards.org/cgi-bin/carddisp.pl?gene=NUPR1
TRPV4	Transient Receptor Potential Cation Channel Subfamily V Member 4	Protein Coding	Q9HBA0	57	GC12M109783	10.6241	https://www.genecards.org/cgi-bin/carddisp.pl?gene=TRPV4
TYR	Tyrosinase	Protein Coding	P14679	57	GC11P089177	10.6069	https://www.genecards.org/cgi-bin/carddisp.pl?gene=TYR
GRAMD1A	GRAM Domain Containing 1A	Protein Coding	Q96CP6	37	GC19P112925	10.5992	https://www.genecards.org/cgi-bin/carddisp.pl?gene=GRAMD1A
TRE-TTC3-1	TRNA-Glu (Anticodon TTC) 3-1	RNA Gene		17	GC01P041019	10.5763	https://www.genecards.org/cgi-bin/carddisp.pl?gene=TRE-TTC3-1
FAS	Fas Cell Surface Death Receptor	Protein Coding	P25445	59	GC10P109381	10.5755	https://www.genecards.org/cgi-bin/carddisp.pl?gene=FAS
TRV-AAC1-4	TRNA-Val (Anticodon AAC) 1-4	RNA Gene		9	GC05M181218	10.5715	https://www.genecards.org/cgi-bin/carddisp.pl?gene=TRV-AAC1-4
GPER1	G Protein-Coupled Estrogen Receptor 1	Protein Coding	Q99527	49	GC07P011353	10.5279	https://www.genecards.org/cgi-bin/carddisp.pl?gene=GPER1
VMP1	Vacuole Membrane Protein 1	Protein Coding	Q96GC9	43	GC17P059707	10.5261	https://www.genecards.org/cgi-bin/carddisp.pl?gene=VMP1
GOLGA2	Golgin A2	Protein Coding	Q08379	49	GC09M128255	10.5213	https://www.genecards.org/cgi-bin/carddisp.pl?gene=GOLGA2
INSR	Insulin Receptor	Protein Coding	P06213	62	GC19M007112	10.518	https://www.genecards.org/cgi-bin/carddisp.pl?gene=INSR
ARL6IP5	ADP Ribosylation Factor Like GTPase 6 Interacting Protein 5	Protein Coding	O75915	43	GC03P069084	10.5174	https://www.genecards.org/cgi-bin/carddisp.pl?gene=ARL6IP5
GRAMD1B	GRAM Domain Containing 1B	Protein Coding	Q3KR37	39	GC11P123358	10.5155	https://www.genecards.org/cgi-bin/carddisp.pl?gene=GRAMD1B
SHC1	SHC Adaptor Protein 1	Protein Coding	P29353	53	GC01M154962	10.4862	https://www.genecards.org/cgi-bin/carddisp.pl?gene=SHC1
EPO	Erythropoietin	Protein Coding	P01588	52	GC07P100720	10.485	https://www.genecards.org/cgi-bin/carddisp.pl?gene=EPO
KCNJ5	Potassium Inwardly Rectifying Channel Subfamily J Member 5	Protein Coding	P48544	56	GC11P128891	10.4622	https://www.genecards.org/cgi-bin/carddisp.pl?gene=KCNJ5
OXTR	Oxytocin Receptor	Protein Coding	P30559	56	GC03M008767	10.4571	https://www.genecards.org/cgi-bin/carddisp.pl?gene=OXTR
EIF4E	Eukaryotic Translation Initiation Factor 4E	Protein Coding	P06730	59	GC04M098879	10.4532	https://www.genecards.org/cgi-bin/carddisp.pl?gene=EIF4E
ZW10	Zw10 Kinetochore Protein	Protein Coding	O43264	46	GC11M113733	10.4378	https://www.genecards.org/cgi-bin/carddisp.pl?gene=ZW10
NPLOC4	NPL4 Homolog, Ubiquitin Recognition Factor	Protein Coding	Q8TAT6	47	GC17M081556	10.4113	https://www.genecards.org/cgi-bin/carddisp.pl?gene=NPLOC4
P3H4	Prolyl 3-Hydroxylase Family Member 4 (Inactive)	Protein Coding	Q92791	45	GC17M041801	10.4054	https://www.genecards.org/cgi-bin/carddisp.pl?gene=P3H4
STRIT1	Small Transmembrane Regulator Of Ion Transport 1	Protein Coding	P0DN84	23	GC03M155294	10.405	https://www.genecards.org/cgi-bin/carddisp.pl?gene=STRIT1
RNF5	Ring Finger Protein 5	Protein Coding	Q99942	48	GC06P134847	10.3941	https://www.genecards.org/cgi-bin/carddisp.pl?gene=RNF5
UBXN8	UBX Domain Protein 8	Protein Coding	O00124	38	GC08P031215	10.3838	https://www.genecards.org/cgi-bin/carddisp.pl?gene=UBXN8
LEP	Leptin	Protein Coding	P41159	55	GC07P128241	10.3776	https://www.genecards.org/cgi-bin/carddisp.pl?gene=LEP
F2	Coagulation Factor II, Thrombin	Protein Coding	P00734	59	GC11P047736	10.367	https://www.genecards.org/cgi-bin/carddisp.pl?gene=F2
PCSK6	Proprotein Convertase Subtilisin/Kexin Type 6	Protein Coding	P29122	50	GC15M148763	10.3595	https://www.genecards.org/cgi-bin/carddisp.pl?gene=PCSK6
ATXN2	Ataxin 2	Protein Coding	Q99700	53	GC12M111443	10.3388	https://www.genecards.org/cgi-bin/carddisp.pl?gene=ATXN2
PITPNB	Phosphatidylinositol Transfer Protein Beta	Protein Coding	P48739	47	GC22M027851	10.3382	https://www.genecards.org/cgi-bin/carddisp.pl?gene=PITPNB
CYB5R3	Cytochrome B5 Reductase 3	Protein Coding	P00387	54	GC22M077135	10.3171	https://www.genecards.org/cgi-bin/carddisp.pl?gene=CYB5R3
MAP2K3	Mitogen-Activated Protein Kinase Kinase 3	Protein Coding	P46734	56	GC17P111656	10.3011	https://www.genecards.org/cgi-bin/carddisp.pl?gene=MAP2K3
PABPC1	Poly(A) Binding Protein Cytoplasmic 1	Protein Coding	P11940	51	GC08M100685	10.2955	https://www.genecards.org/cgi-bin/carddisp.pl?gene=PABPC1
NCK1	NCK Adaptor Protein 1	Protein Coding	P16333	50	GC03P136862	10.2916	https://www.genecards.org/cgi-bin/carddisp.pl?gene=NCK1
UFD1	Ubiquitin Recognition Factor In ER Associated Degradation 1	Protein Coding	Q92890	51	GC22M020042	10.2744	https://www.genecards.org/cgi-bin/carddisp.pl?gene=UFD1
CERT1	Ceramide Transporter 1	Protein Coding	Q9Y5P4	50	GC05M075356	10.272	https://www.genecards.org/cgi-bin/carddisp.pl?gene=CERT1
PTPN2	Protein Tyrosine Phosphatase Non-Receptor Type 2	Protein Coding	P17706	55	GC18M033992	10.2684	https://www.genecards.org/cgi-bin/carddisp.pl?gene=PTPN2
PRL	Prolactin	Protein Coding	P01236	53	GC06M022287	10.2534	https://www.genecards.org/cgi-bin/carddisp.pl?gene=PRL
MIR34C	MicroRNA 34c	RNA Gene		29	GC11P112480	10.2523	https://www.genecards.org/cgi-bin/carddisp.pl?gene=MIR34C
DPM1	Dolichyl-Phosphate Mannosyltransferase Subunit 1, Catalytic	Protein Coding	O60762	52	GC20M050934	10.2301	https://www.genecards.org/cgi-bin/carddisp.pl?gene=DPM1
TRPM2	Transient Receptor Potential Cation Channel Subfamily M Member 2	Protein Coding	O94759	43	GC21P044350	10.2166	https://www.genecards.org/cgi-bin/carddisp.pl?gene=TRPM2
LPCAT3	Lysophosphatidylcholine Acyltransferase 3	Protein Coding	Q6P1A2	44	GC12M006976	10.2144	https://www.genecards.org/cgi-bin/carddisp.pl?gene=LPCAT3
HDAC6	Histone Deacetylase 6	Protein Coding	Q9UBN7	62	GC0XP048801	10.2023	https://www.genecards.org/cgi-bin/carddisp.pl?gene=HDAC6
CCND1	Cyclin D1	Protein Coding	P24385	62	GC11P069641	10.1884	https://www.genecards.org/cgi-bin/carddisp.pl?gene=CCND1
DSPP	Dentin Sialophosphoprotein	Protein Coding	Q9NZW4	47	GC04P087608	10.1859	https://www.genecards.org/cgi-bin/carddisp.pl?gene=DSPP
OMA1	OMA1 Zinc Metallopeptidase	Protein Coding	Q96E52	45	GC01M058415	10.1834	https://www.genecards.org/cgi-bin/carddisp.pl?gene=OMA1
NDRG1	N-Myc Downstream Regulated 1	Protein Coding	Q92597	54	GC08M133237	10.1822	https://www.genecards.org/cgi-bin/carddisp.pl?gene=NDRG1
CP	Ceruloplasmin	Protein Coding	P00450	57	GC03M149162	10.1808	https://www.genecards.org/cgi-bin/carddisp.pl?gene=CP
PLEKHF2	Pleckstrin Homology And FYVE Domain Containing 2	Protein Coding	Q9H8W4	40	GC08P095115	10.1667	https://www.genecards.org/cgi-bin/carddisp.pl?gene=PLEKHF2
XK	X-Linked Kx Blood Group Antigen, Kell And VPS13A Binding Protein	Protein Coding	P51811	49	GC0XP037685	10.1533	https://www.genecards.org/cgi-bin/carddisp.pl?gene=XK
HLA-C	Major Histocompatibility Complex, Class I, C	Protein Coding	P10321	53	GC06M093737	10.1508	https://www.genecards.org/cgi-bin/carddisp.pl?gene=HLA-C
KRAS	KRAS Proto-Oncogene, GTPase	Protein Coding	P01116	61	GC12M029682	10.1422	https://www.genecards.org/cgi-bin/carddisp.pl?gene=KRAS
RETREG2	Reticulophagy Regulator Family Member 2	Protein Coding	Q8NC44	37	GC02P219439	10.139	https://www.genecards.org/cgi-bin/carddisp.pl?gene=RETREG2
TUG1	Taurine Up-Regulated 1	Protein Coding	A0A6I8PU40	32	GC22P030969	10.1371	https://www.genecards.org/cgi-bin/carddisp.pl?gene=TUG1
LBR	Lamin B Receptor	Protein Coding	Q14739	55	GC01M225401	10.1222	https://www.genecards.org/cgi-bin/carddisp.pl?gene=LBR
BOK	BCL2 Family Apoptosis Regulator BOK	Protein Coding	Q9UMX3	46	GC02P241663	10.1026	https://www.genecards.org/cgi-bin/carddisp.pl?gene=BOK
PIGN	Phosphatidylinositol Glycan Anchor Biosynthesis Class N	Protein Coding	O95427	48	GC18M061905	10.0992	https://www.genecards.org/cgi-bin/carddisp.pl?gene=PIGN
PRKCA	Protein Kinase C Alpha	Protein Coding	P17252	59	GC17P066302	10.0936	https://www.genecards.org/cgi-bin/carddisp.pl?gene=PRKCA
MCL1	MCL1 Apoptosis Regulator, BCL2 Family Member	Protein Coding	Q07820	56	GC01M160760	10.0936	https://www.genecards.org/cgi-bin/carddisp.pl?gene=MCL1
SMPD1	Sphingomyelin Phosphodiesterase 1	Protein Coding	P17405	57	GC11P006390	10.0899	https://www.genecards.org/cgi-bin/carddisp.pl?gene=SMPD1
PKM	Pyruvate Kinase M1/2	Protein Coding	P14618	58	GC15M072199	10.086	https://www.genecards.org/cgi-bin/carddisp.pl?gene=PKM
ITPR2	Inositol 1,4,5-Trisphosphate Receptor Type 2	Protein Coding	Q14571	53	GC12M029728	10.0723	https://www.genecards.org/cgi-bin/carddisp.pl?gene=ITPR2
RAB18	RAB18, Member RAS Oncogene Family	Protein Coding	Q9NP72	47	GC10P027504	10.0572	https://www.genecards.org/cgi-bin/carddisp.pl?gene=RAB18
NOS1	Nitric Oxide Synthase 1	Protein Coding	P29475	58	GC12M117208	10.0551	https://www.genecards.org/cgi-bin/carddisp.pl?gene=NOS1
SLC39A14	Solute Carrier Family 39 Member 14	Protein Coding	Q15043	52	GC08P022367	10.0279	https://www.genecards.org/cgi-bin/carddisp.pl?gene=SLC39A14
KPNB1	Karyopherin Subunit Beta 1	Protein Coding	Q14974	53	GC17P047649	10.0244	https://www.genecards.org/cgi-bin/carddisp.pl?gene=KPNB1
ADRB2	Adrenoceptor Beta 2	Protein Coding	P07550	57	GC05P152320	10.0227	https://www.genecards.org/cgi-bin/carddisp.pl?gene=ADRB2
DST	Dystonin	Protein Coding	Q03001	51	GC06M056457	10.0167	https://www.genecards.org/cgi-bin/carddisp.pl?gene=DST
JAK2	Janus Kinase 2	Protein Coding	O60674	62	GC09P004985	10.0154	https://www.genecards.org/cgi-bin/carddisp.pl?gene=JAK2
PTGS1	Prostaglandin-Endoperoxide Synthase 1	Protein Coding	P23219	55	GC09P122370	10.0087	https://www.genecards.org/cgi-bin/carddisp.pl?gene=PTGS1
BRAF	B-Raf Proto-Oncogene, Serine/Threonine Kinase	Protein Coding	P15056	62	GC07M140773	10.0043	https://www.genecards.org/cgi-bin/carddisp.pl?gene=BRAF
PIGK	Phosphatidylinositol Glycan Anchor Biosynthesis Class K	Protein Coding	Q92643	50	GC01M077088	9.99769	https://www.genecards.org/cgi-bin/carddisp.pl?gene=PIGK
IGF2BP1	Insulin Like Growth Factor 2 MRNA Binding Protein 1	Protein Coding	Q9NZI8	48	GC17P112592	9.99329	https://www.genecards.org/cgi-bin/carddisp.pl?gene=IGF2BP1
SFTPC	Surfactant Protein C	Protein Coding	P11686	50	GC08P022156	9.97841	https://www.genecards.org/cgi-bin/carddisp.pl?gene=SFTPC
RCN1	Reticulocalbin 1	Protein Coding	Q15293	48	GC11P032090	9.96669	https://www.genecards.org/cgi-bin/carddisp.pl?gene=RCN1
PROC	Protein C, Inactivator Of Coagulation Factors Va And VIIIa	Protein Coding	P04070	60	GC02P127418	9.94711	https://www.genecards.org/cgi-bin/carddisp.pl?gene=PROC
DRD2	Dopamine Receptor D2	Protein Coding	P14416	58	GC11M113409	9.93533	https://www.genecards.org/cgi-bin/carddisp.pl?gene=DRD2
UCP2	Uncoupling Protein 2	Protein Coding	P55851	55	GC11M073974	9.9342	https://www.genecards.org/cgi-bin/carddisp.pl?gene=UCP2
EMC3	ER Membrane Protein Complex Subunit 3	Protein Coding	Q9P0I2	38	GC03M010833	9.92461	https://www.genecards.org/cgi-bin/carddisp.pl?gene=EMC3
RAB2A	RAB2A, Member RAS Oncogene Family	Protein Coding	P61019	48	GC08P060516	9.91531	https://www.genecards.org/cgi-bin/carddisp.pl?gene=RAB2A
DPAGT1	Dolichyl-Phosphate N-Acetylglucosaminephosphotransferase 1	Protein Coding	Q9H3H5	53	GC11M126559	9.91234	https://www.genecards.org/cgi-bin/carddisp.pl?gene=DPAGT1
SRPRB	SRP Receptor Subunit Beta	Protein Coding	Q9Y5M8	42	GC03P133784	9.90873	https://www.genecards.org/cgi-bin/carddisp.pl?gene=SRPRB
POR	Cytochrome P450 Oxidoreductase	Protein Coding	P16435	55	GC07P075899	9.90509	https://www.genecards.org/cgi-bin/carddisp.pl?gene=POR
C9orf72	C9orf72-SMCR8 Complex Subunit	Protein Coding	Q96LT7	49	GC09M029601	9.89384	https://www.genecards.org/cgi-bin/carddisp.pl?gene=C9orf72
PKD1	Polycystin 1, Transient Receptor Potential Channel Interacting	Protein Coding	P98161	54	GC16M020311	9.87982	https://www.genecards.org/cgi-bin/carddisp.pl?gene=PKD1
ATF2	Activating Transcription Factor 2	Protein Coding	P15336	54	GC02M175072	9.84686	https://www.genecards.org/cgi-bin/carddisp.pl?gene=ATF2
MGST1	Microsomal Glutathione S-Transferase 1	Protein Coding	P10620	50	GC12P016347	9.84555	https://www.genecards.org/cgi-bin/carddisp.pl?gene=MGST1
UBXN4	UBX Domain Protein 4	Protein Coding	Q92575	42	GC02P135741	9.81786	https://www.genecards.org/cgi-bin/carddisp.pl?gene=UBXN4
MIR34A	MicroRNA 34a	RNA Gene		29	GC01M014460	9.8132	https://www.genecards.org/cgi-bin/carddisp.pl?gene=MIR34A
UBB	Ubiquitin B	Protein Coding	P0CG47	53	GC17P016380	9.80718	https://www.genecards.org/cgi-bin/carddisp.pl?gene=UBB
RPL11	Ribosomal Protein L11	Protein Coding	P62913	56	GC01P023691	9.80263	https://www.genecards.org/cgi-bin/carddisp.pl?gene=RPL11
MIR133B	MicroRNA 133b	RNA Gene		29	GC06P052148	9.78728	https://www.genecards.org/cgi-bin/carddisp.pl?gene=MIR133B
TMED1	Transmembrane P24 Trafficking Protein 1	Protein Coding	Q13445	46	GC19M010832	9.78336	https://www.genecards.org/cgi-bin/carddisp.pl?gene=TMED1
EMC4	ER Membrane Protein Complex Subunit 4	Protein Coding	Q5J8M3	39	GC15P156912	9.77573	https://www.genecards.org/cgi-bin/carddisp.pl?gene=EMC4
NBAS	NBAS Subunit Of NRZ Tethering Complex	Protein Coding	A2RRP1	48	GC02M014798	9.77552	https://www.genecards.org/cgi-bin/carddisp.pl?gene=NBAS
AGR3	Anterior Gradient 3, Protein Disulphide Isomerase Family Member	Protein Coding	Q8TD06	44	GC07M016854	9.77315	https://www.genecards.org/cgi-bin/carddisp.pl?gene=AGR3
PSMD2	Proteasome 26S Subunit Ubiquitin Receptor, Non-ATPase 2	Protein Coding	Q13200	52	GC03P184452	9.7703	https://www.genecards.org/cgi-bin/carddisp.pl?gene=PSMD2
YBX1	Y-Box Binding Protein 1	Protein Coding	P67809	49	GC01P042682	9.75691	https://www.genecards.org/cgi-bin/carddisp.pl?gene=YBX1
SRP14	Signal Recognition Particle 14	Protein Coding	P37108	45	GC15M040035	9.75562	https://www.genecards.org/cgi-bin/carddisp.pl?gene=SRP14
JPH1	Junctophilin 1	Protein Coding	Q9HDC5	48	GC08M074234	9.74715	https://www.genecards.org/cgi-bin/carddisp.pl?gene=JPH1
SHISA5	Shisa Family Member 5	Protein Coding	Q8N114	42	GC03M048468	9.74346	https://www.genecards.org/cgi-bin/carddisp.pl?gene=SHISA5
RPL5	Ribosomal Protein L5	Protein Coding	P46777	56	GC01P092845	9.7376	https://www.genecards.org/cgi-bin/carddisp.pl?gene=RPL5
SSR1	Signal Sequence Receptor Subunit 1	Protein Coding	P43307	46	GC06M007268	9.73319	https://www.genecards.org/cgi-bin/carddisp.pl?gene=SSR1
GADD45A	Growth Arrest And DNA Damage Inducible Alpha	Protein Coding	P24522	52	GC01P067685	9.71328	https://www.genecards.org/cgi-bin/carddisp.pl?gene=GADD45A
YKT6	YKT6 V-SNARE Homolog	Protein Coding	O15498	47	GC07P044200	9.71274	https://www.genecards.org/cgi-bin/carddisp.pl?gene=YKT6
SAMD8	Sterile Alpha Motif Domain Containing 8	Protein Coding	Q96LT4	45	GC10P075099	9.71207	https://www.genecards.org/cgi-bin/carddisp.pl?gene=SAMD8
SACM1L	SAC1 Like Phosphatidylinositide Phosphatase	Protein Coding	Q9NTJ5	41	GC03P057377	9.71034	https://www.genecards.org/cgi-bin/carddisp.pl?gene=SACM1L
TGM2	Transglutaminase 2	Protein Coding	P21980	56	GC20M038127	9.70074	https://www.genecards.org/cgi-bin/carddisp.pl?gene=TGM2
EBP	EBP Cholestenol Delta-Isomerase	Protein Coding	Q15125	52	GC0XP048521	9.69122	https://www.genecards.org/cgi-bin/carddisp.pl?gene=EBP
RHBDD1	Rhomboid Domain Containing 1	Protein Coding	Q8TEB9	40	GC02P226855	9.67815	https://www.genecards.org/cgi-bin/carddisp.pl?gene=RHBDD1
MT-TP	Mitochondrially Encoded TRNA-Pro (CCN)	RNA Gene		15	GCMTM015957	9.67812	https://www.genecards.org/cgi-bin/carddisp.pl?gene=MT-TP
C2CD2L	C2CD2 Like	Protein Coding	O14523	39	GC11P119102	9.67731	https://www.genecards.org/cgi-bin/carddisp.pl?gene=C2CD2L
ZFYVE1	Zinc Finger FYVE-Type Containing 1	Protein Coding	Q9HBF4	42	GC14M072969	9.66819	https://www.genecards.org/cgi-bin/carddisp.pl?gene=ZFYVE1
CDH1	Cadherin 1	Protein Coding	P12830	58	GC16P068737	9.65679	https://www.genecards.org/cgi-bin/carddisp.pl?gene=CDH1
TMEM41B	Transmembrane Protein 41B	Protein Coding	Q5BJD5	43	GC11M009280	9.65326	https://www.genecards.org/cgi-bin/carddisp.pl?gene=TMEM41B
YWHAE	Tyrosine 3-Monooxygenase/Tryptophan 5-Monooxygenase Activation Protein Epsilon	Protein Coding	P62258	58	GC17M074382	9.65125	https://www.genecards.org/cgi-bin/carddisp.pl?gene=YWHAE
GDF15	Growth Differentiation Factor 15	Protein Coding	Q99988	52	GC19P112633	9.64596	https://www.genecards.org/cgi-bin/carddisp.pl?gene=GDF15
KDR	Kinase Insert Domain Receptor	Protein Coding	P35968	62	GC04M055078	9.63632	https://www.genecards.org/cgi-bin/carddisp.pl?gene=KDR
MTDH	Metadherin	Protein Coding	Q86UE4	48	GC08P097644	9.63396	https://www.genecards.org/cgi-bin/carddisp.pl?gene=MTDH
CAMK2B	Calcium/Calmodulin Dependent Protein Kinase II Beta	Protein Coding	Q13554	58	GC07M045339	9.63125	https://www.genecards.org/cgi-bin/carddisp.pl?gene=CAMK2B
UFM1	Ubiquitin Fold Modifier 1	Protein Coding	P61960	50	GC13P038349	9.62947	https://www.genecards.org/cgi-bin/carddisp.pl?gene=UFM1
RFT1	RFT1 Homolog	Protein Coding	Q96AA3	44	GC03M053919	9.62634	https://www.genecards.org/cgi-bin/carddisp.pl?gene=RFT1
DPM3	Dolichyl-Phosphate Mannosyltransferase Subunit 3, Regulatory	Protein Coding	Q9P2X0	49	GC01M155139	9.62561	https://www.genecards.org/cgi-bin/carddisp.pl?gene=DPM3
FKBP10	FKBP Prolyl Isomerase 10	Protein Coding	Q96AY3	50	GC17P041812	9.61287	https://www.genecards.org/cgi-bin/carddisp.pl?gene=FKBP10
MAP3K7	Mitogen-Activated Protein Kinase Kinase Kinase 7	Protein Coding	O43318	59	GC06M090513	9.61086	https://www.genecards.org/cgi-bin/carddisp.pl?gene=MAP3K7
CTSB	Cathepsin B	Protein Coding	P07858	60	GC08M011842	9.60259	https://www.genecards.org/cgi-bin/carddisp.pl?gene=CTSB
UBA5	Ubiquitin Like Modifier Activating Enzyme 5	Protein Coding	Q9GZZ9	48	GC03P132654	9.59537	https://www.genecards.org/cgi-bin/carddisp.pl?gene=UBA5
KHSRP	KH-Type Splicing Regulatory Protein	Protein Coding	Q92945	45	GC19M006413	9.5932	https://www.genecards.org/cgi-bin/carddisp.pl?gene=KHSRP
SEC11A	SEC11 Homolog A, Signal Peptidase Complex Subunit	Protein Coding	P67812	45	GC15M084669	9.59085	https://www.genecards.org/cgi-bin/carddisp.pl?gene=SEC11A
ELAVL1	ELAV Like RNA Binding Protein 1	Protein Coding	Q15717	50	GC19M007958	9.57063	https://www.genecards.org/cgi-bin/carddisp.pl?gene=ELAVL1
BAG3	BAG Cochaperone 3	Protein Coding	O95817	52	GC10P119651	9.57033	https://www.genecards.org/cgi-bin/carddisp.pl?gene=BAG3
SCFD1	Sec1 Family Domain Containing 1	Protein Coding	Q8WVM8	48	GC14P030622	9.56412	https://www.genecards.org/cgi-bin/carddisp.pl?gene=SCFD1
TXNRD1	Thioredoxin Reductase 1	Protein Coding	Q16881	52	GC12P104215	9.5579	https://www.genecards.org/cgi-bin/carddisp.pl?gene=TXNRD1
HMOX2	Heme Oxygenase 2	Protein Coding	P30519	54	GC16P004474	9.55383	https://www.genecards.org/cgi-bin/carddisp.pl?gene=HMOX2
NGLY1	N-Glycanase 1	Protein Coding	Q96IV0	51	GC03M025718	9.54841	https://www.genecards.org/cgi-bin/carddisp.pl?gene=NGLY1
ASNS	Asparagine Synthetase (Glutamine-Hydrolyzing)	Protein Coding	P08243	55	GC07M097854	9.54694	https://www.genecards.org/cgi-bin/carddisp.pl?gene=ASNS
EMC6	ER Membrane Protein Complex Subunit 6	Protein Coding	Q9BV81	37	GC17P003668	9.54074	https://www.genecards.org/cgi-bin/carddisp.pl?gene=EMC6
MMGT1	Membrane Magnesium Transporter 1	Protein Coding	Q8N4V1	40	GC0XM135962	9.54017	https://www.genecards.org/cgi-bin/carddisp.pl?gene=MMGT1
CD36	CD36 Molecule (CD36 Blood Group)	Protein Coding	P16671	59	GC07P080369	9.53516	https://www.genecards.org/cgi-bin/carddisp.pl?gene=CD36
FUS	FUS RNA Binding Protein	Protein Coding	P35637	54	GC16P031180	9.52381	https://www.genecards.org/cgi-bin/carddisp.pl?gene=FUS
ZC3H12A	Zinc Finger CCCH-Type Containing 12A	Protein Coding	Q5D1E8	47	GC01P037474	9.51977	https://www.genecards.org/cgi-bin/carddisp.pl?gene=ZC3H12A
CDK5	Cyclin Dependent Kinase 5	Protein Coding	Q00535	62	GC07M151053	9.51577	https://www.genecards.org/cgi-bin/carddisp.pl?gene=CDK5
MSRB3	Methionine Sulfoxide Reductase B3	Protein Coding	Q8IXL7	49	GC12P065279	9.50515	https://www.genecards.org/cgi-bin/carddisp.pl?gene=MSRB3
PPP1CC	Protein Phosphatase 1 Catalytic Subunit Gamma	Protein Coding	P36873	54	GC12M110709	9.49911	https://www.genecards.org/cgi-bin/carddisp.pl?gene=PPP1CC
HACD3	3-Hydroxyacyl-CoA Dehydratase 3	Protein Coding	Q9P035	41	GC15P065530	9.48605	https://www.genecards.org/cgi-bin/carddisp.pl?gene=HACD3
LINC01554	Long Intergenic Non-Protein Coding RNA 1554	RNA Gene	Q52M75	27	GC05P095838	9.48108	https://www.genecards.org/cgi-bin/carddisp.pl?gene=LINC01554
CAPRIN1	Cell Cycle Associated Protein 1	Protein Coding	Q14444	47	GC11P034051	9.47411	https://www.genecards.org/cgi-bin/carddisp.pl?gene=CAPRIN1
CTNNB1	Catenin Beta 1	Protein Coding	P35222	62	GC03P041194	9.4704	https://www.genecards.org/cgi-bin/carddisp.pl?gene=CTNNB1
GABARAP	GABA Type A Receptor-Associated Protein	Protein Coding	O95166	51	GC17M007240	9.46968	https://www.genecards.org/cgi-bin/carddisp.pl?gene=GABARAP
F8	Coagulation Factor VIII	Protein Coding	P00451	56	GC0XM154835	9.46279	https://www.genecards.org/cgi-bin/carddisp.pl?gene=F8
SI	Sucrase-Isomaltase	Protein Coding	P14410	54	GC03M164978	9.46111	https://www.genecards.org/cgi-bin/carddisp.pl?gene=SI
SET	SET Nuclear Proto-Oncogene	Protein Coding	Q01105	51	GC09P141431	9.44111	https://www.genecards.org/cgi-bin/carddisp.pl?gene=SET
ATG14	Autophagy Related 14	Protein Coding	Q6ZNE5	45	GC14M055366	9.4336	https://www.genecards.org/cgi-bin/carddisp.pl?gene=ATG14
OSBPL5	Oxysterol Binding Protein Like 5	Protein Coding	Q9H0X9	46	GC11M011936	9.42346	https://www.genecards.org/cgi-bin/carddisp.pl?gene=OSBPL5
TEX2	Testis Expressed 2	Protein Coding	Q8IWB9	41	GC17M064147	9.41917	https://www.genecards.org/cgi-bin/carddisp.pl?gene=TEX2
SCP2	Sterol Carrier Protein 2	Protein Coding	P22307	54	GC01P052927	9.41408	https://www.genecards.org/cgi-bin/carddisp.pl?gene=SCP2
GABARAPL1	GABA Type A Receptor Associated Protein Like 1	Protein Coding	Q9H0R8	49	GC12P010212	9.41193	https://www.genecards.org/cgi-bin/carddisp.pl?gene=GABARAPL1
RELA	RELA Proto-Oncogene, NF-KB Subunit	Protein Coding	Q04206	60	GC11M065653	9.40994	https://www.genecards.org/cgi-bin/carddisp.pl?gene=RELA
RPL10	Ribosomal Protein L10	Protein Coding	P27635	52	GC0XP154389	9.39346	https://www.genecards.org/cgi-bin/carddisp.pl?gene=RPL10
PLP1	Proteolipid Protein 1	Protein Coding	P60201	52	GC0XP103773	9.38708	https://www.genecards.org/cgi-bin/carddisp.pl?gene=PLP1
F9	Coagulation Factor IX	Protein Coding	P00740	56	GC0XP139530	9.38189	https://www.genecards.org/cgi-bin/carddisp.pl?gene=F9
BTRC	Beta-Transducin Repeat Containing E3 Ubiquitin Protein Ligase	Protein Coding	Q9Y297	53	GC10P101354	9.38123	https://www.genecards.org/cgi-bin/carddisp.pl?gene=BTRC
POMT2	Protein O-Mannosyltransferase 2	Protein Coding	Q9UKY4	52	GC14M077274	9.3699	https://www.genecards.org/cgi-bin/carddisp.pl?gene=POMT2
CGRRF1	Cell Growth Regulator With Ring Finger Domain 1	Protein Coding	Q99675	37	GC14P054509	9.36706	https://www.genecards.org/cgi-bin/carddisp.pl?gene=CGRRF1
NOD1	Nucleotide Binding Oligomerization Domain Containing 1	Protein Coding	Q9Y239	51	GC07M030424	9.35257	https://www.genecards.org/cgi-bin/carddisp.pl?gene=NOD1
HACD2	3-Hydroxyacyl-CoA Dehydratase 2	Protein Coding	Q6Y1H2	40	GC03M123490	9.35098	https://www.genecards.org/cgi-bin/carddisp.pl?gene=HACD2
SFTA3	Surfactant Associated 3	RNA Gene	P0C7M3	39	GC14M036474	9.34566	https://www.genecards.org/cgi-bin/carddisp.pl?gene=SFTA3
NR1H2	Nuclear Receptor Subfamily 1 Group H Member 2	Protein Coding	P55055	54	GC19P050329	9.34417	https://www.genecards.org/cgi-bin/carddisp.pl?gene=NR1H2
KDSR	3-Ketodihydrosphingosine Reductase	Protein Coding	Q06136	51	GC18M063327	9.33635	https://www.genecards.org/cgi-bin/carddisp.pl?gene=KDSR
FURIN	Furin, Paired Basic Amino Acid Cleaving Enzyme	Protein Coding	P09958	56	GC15P090868	9.33546	https://www.genecards.org/cgi-bin/carddisp.pl?gene=FURIN
TMCO1	Transmembrane And Coiled-Coil Domains 1	Protein Coding	Q9UM00	48	GC01M165724	9.32304	https://www.genecards.org/cgi-bin/carddisp.pl?gene=TMCO1
HAX1	HCLS1 Associated Protein X-1	Protein Coding	O00165	51	GC01P164481	9.31946	https://www.genecards.org/cgi-bin/carddisp.pl?gene=HAX1
PPP1CB	Protein Phosphatase 1 Catalytic Subunit Beta	Protein Coding	P62140	54	GC02P028766	9.3182	https://www.genecards.org/cgi-bin/carddisp.pl?gene=PPP1CB
MAPKAP1	MAPK Associated Protein 1	Protein Coding	Q9BPZ7	50	GC09M125437	9.30353	https://www.genecards.org/cgi-bin/carddisp.pl?gene=MAPKAP1
FAM120A	Family With Sequence Similarity 120 Member A	Protein Coding	Q9NZB2	42	GC09P100392	9.29645	https://www.genecards.org/cgi-bin/carddisp.pl?gene=FAM120A
APOA1	Apolipoprotein A1	Protein Coding	P02647	59	GC11M116835	9.29328	https://www.genecards.org/cgi-bin/carddisp.pl?gene=APOA1
GRIN2B	Glutamate Ionotropic Receptor NMDA Type Subunit 2B	Protein Coding	Q13224	61	GC12M013437	9.29291	https://www.genecards.org/cgi-bin/carddisp.pl?gene=GRIN2B
OSBPL3	Oxysterol Binding Protein Like 3	Protein Coding	Q9H4L5	41	GC07M024836	9.29266	https://www.genecards.org/cgi-bin/carddisp.pl?gene=OSBPL3
SELENOF	Selenoprotein F	Protein Coding	O60613	39	GC01M086863	9.27473	https://www.genecards.org/cgi-bin/carddisp.pl?gene=SELENOF
TMEM258	Transmembrane Protein 258	Protein Coding	P61165	38	GC11M061768	9.26247	https://www.genecards.org/cgi-bin/carddisp.pl?gene=TMEM258
PPM1L	Protein Phosphatase, Mg2+/Mn2+ Dependent 1L	Protein Coding	Q5SGD2	43	GC03P160755	9.25877	https://www.genecards.org/cgi-bin/carddisp.pl?gene=PPM1L
PARP16	Poly(ADP-Ribose) Polymerase Family Member 16	Protein Coding	Q8N5Y8	44	GC15M147956	9.24213	https://www.genecards.org/cgi-bin/carddisp.pl?gene=PARP16
LRRC59	Leucine Rich Repeat Containing 59	Protein Coding	Q96AG4	41	GC17M050375	9.23836	https://www.genecards.org/cgi-bin/carddisp.pl?gene=LRRC59
SGPP1	Sphingosine-1-Phosphate Phosphatase 1	Protein Coding	Q9BX95	42	GC14M063684	9.23722	https://www.genecards.org/cgi-bin/carddisp.pl?gene=SGPP1
SLC39A7	Solute Carrier Family 39 Member 7	Protein Coding	Q92504	50	GC06P033200	9.23354	https://www.genecards.org/cgi-bin/carddisp.pl?gene=SLC39A7
PCNA	Proliferating Cell Nuclear Antigen	Protein Coding	P12004	59	GC20M005114	9.22813	https://www.genecards.org/cgi-bin/carddisp.pl?gene=PCNA
PML	PML Nuclear Body Scaffold	Protein Coding	P29590	54	GC15P073994	9.22202	https://www.genecards.org/cgi-bin/carddisp.pl?gene=PML
TERT	Telomerase Reverse Transcriptase	Protein Coding	O14746	60	GC05M001253	9.22003	https://www.genecards.org/cgi-bin/carddisp.pl?gene=TERT
PLOD3	Procollagen-Lysine,2-Oxoglutarate 5-Dioxygenase 3	Protein Coding	O60568	53	GC07M101205	9.20104	https://www.genecards.org/cgi-bin/carddisp.pl?gene=PLOD3
SOD3	Superoxide Dismutase 3	Protein Coding	P08294	52	GC04P025034	9.19983	https://www.genecards.org/cgi-bin/carddisp.pl?gene=SOD3
CDK5RAP3	CDK5 Regulatory Subunit Associated Protein 3	Protein Coding	Q96JB5	44	GC17P047967	9.19514	https://www.genecards.org/cgi-bin/carddisp.pl?gene=CDK5RAP3
REEP1	Receptor Accessory Protein 1	Protein Coding	Q9H902	49	GC02M086213	9.19107	https://www.genecards.org/cgi-bin/carddisp.pl?gene=REEP1
CALHM1	Calcium Homeostasis Modulator 1	Protein Coding	Q8IU99	43	GC10M103454	9.1875	https://www.genecards.org/cgi-bin/carddisp.pl?gene=CALHM1
MX1	MX Dynamin Like GTPase 1	Protein Coding	P20591	50	GC21P041420	9.18701	https://www.genecards.org/cgi-bin/carddisp.pl?gene=MX1
F10	Coagulation Factor X	Protein Coding	P00742	59	GC13P113122	9.1799	https://www.genecards.org/cgi-bin/carddisp.pl?gene=F10
PLOD1	Procollagen-Lysine,2-Oxoglutarate 5-Dioxygenase 1	Protein Coding	Q02809	53	GC01P011934	9.17901	https://www.genecards.org/cgi-bin/carddisp.pl?gene=PLOD1
PWAR4	Prader Willi/Angelman Region RNA 4	RNA Gene		15	GC15P025211	9.15822	https://www.genecards.org/cgi-bin/carddisp.pl?gene=PWAR4
BCL2L10	BCL2 Like 10	Protein Coding	Q9HD36	44	GC15M148782	9.15775	https://www.genecards.org/cgi-bin/carddisp.pl?gene=BCL2L10
ANK1	Ankyrin 1	Protein Coding	P16157	54	GC08M041653	9.15024	https://www.genecards.org/cgi-bin/carddisp.pl?gene=ANK1
TRAPPC2	Trafficking Protein Particle Complex Subunit 2	Protein Coding	P0DI81	47	GC0XM013712	9.14995	https://www.genecards.org/cgi-bin/carddisp.pl?gene=TRAPPC2
PPP1R12A	Protein Phosphatase 1 Regulatory Subunit 12A	Protein Coding	O14974	52	GC12M079773	9.12952	https://www.genecards.org/cgi-bin/carddisp.pl?gene=PPP1R12A
SOAT2	Sterol O-Acyltransferase 2	Protein Coding	O75908	50	GC12P053103	9.1283	https://www.genecards.org/cgi-bin/carddisp.pl?gene=SOAT2
GRIN2A	Glutamate Ionotropic Receptor NMDA Type Subunit 2A	Protein Coding	Q12879	60	GC16M009753	9.12017	https://www.genecards.org/cgi-bin/carddisp.pl?gene=GRIN2A
MYDGF	Myeloid Derived Growth Factor	Protein Coding	Q969H8	42	GC19M004641	9.10093	https://www.genecards.org/cgi-bin/carddisp.pl?gene=MYDGF
SSR2	Signal Sequence Receptor Subunit 2	Protein Coding	P43308	45	GC01M156009	9.09667	https://www.genecards.org/cgi-bin/carddisp.pl?gene=SSR2
HTR1A	5-Hydroxytryptamine Receptor 1A	Protein Coding	P08908	55	GC05M063960	9.09624	https://www.genecards.org/cgi-bin/carddisp.pl?gene=HTR1A
MIR21	MicroRNA 21	RNA Gene		31	GC17P112757	9.08898	https://www.genecards.org/cgi-bin/carddisp.pl?gene=MIR21
DELE1	DAP3 Binding Cell Death Enhancer 1	Protein Coding	Q14154	40	GC05P152520	9.08757	https://www.genecards.org/cgi-bin/carddisp.pl?gene=DELE1
HSPA6	Heat Shock Protein Family A (Hsp70) Member 6	Protein Coding	P17066	51	GC01P161524	9.08386	https://www.genecards.org/cgi-bin/carddisp.pl?gene=HSPA6
UBQLN2	Ubiquilin 2	Protein Coding	Q9UHD9	51	GC0XP056563	9.08083	https://www.genecards.org/cgi-bin/carddisp.pl?gene=UBQLN2
NOTCH2	Notch Receptor 2	Protein Coding	Q04721	59	GC01M119911	9.07566	https://www.genecards.org/cgi-bin/carddisp.pl?gene=NOTCH2
UGT1A10	UDP Glucuronosyltransferase Family 1 Member A10	Protein Coding	Q9HAW8	50	GC02P233636	9.07507	https://www.genecards.org/cgi-bin/carddisp.pl?gene=UGT1A10
COPE	COPI Coat Complex Subunit Epsilon	Protein Coding	O14579	46	GC19M018899	9.06105	https://www.genecards.org/cgi-bin/carddisp.pl?gene=COPE
SUMF2	Sulfatase Modifying Factor 2	Protein Coding	Q8NBJ7	46	GC07P060626	9.05373	https://www.genecards.org/cgi-bin/carddisp.pl?gene=SUMF2
NPM1	Nucleophosmin 1	Protein Coding	P06748	59	GC05P171387	9.0516	https://www.genecards.org/cgi-bin/carddisp.pl?gene=NPM1
AGTR1	Angiotensin II Receptor Type 1	Protein Coding	P30556	60	GC03P148697	9.04695	https://www.genecards.org/cgi-bin/carddisp.pl?gene=AGTR1
CTSD	Cathepsin D	Protein Coding	P07339	61	GC11M001752	9.04503	https://www.genecards.org/cgi-bin/carddisp.pl?gene=CTSD
COMP	Cartilage Oligomeric Matrix Protein	Protein Coding	P49747	55	GC19M092422	9.03678	https://www.genecards.org/cgi-bin/carddisp.pl?gene=COMP
TRAPPC5	Trafficking Protein Particle Complex Subunit 5	Protein Coding	Q8IUR0	41	GC19P007680	9.02821	https://www.genecards.org/cgi-bin/carddisp.pl?gene=TRAPPC5
ANKS4B	Ankyrin Repeat And Sterile Alpha Motif Domain Containing 4B	Protein Coding	Q8N8V4	41	GC16P080986	9.02104	https://www.genecards.org/cgi-bin/carddisp.pl?gene=ANKS4B
ZFYVE27	Zinc Finger FYVE-Type Containing 27	Protein Coding	Q5T4F4	45	GC10P109568	9.01935	https://www.genecards.org/cgi-bin/carddisp.pl?gene=ZFYVE27
SCARA3	Scavenger Receptor Class A Member 3	Protein Coding	Q6AZY7	43	GC08P027633	9.01105	https://www.genecards.org/cgi-bin/carddisp.pl?gene=SCARA3

## Sheet: Supplementary table 3
Table SIII. In this study, 67 ER-related genes in lung adenocarcinoma were investigated.
key_gene
TRDN
CASQ2
ATP2A1
CAT
INS
WFS1
SCN5A
ATF3
IL6
H19
KCNH2
PDIA2
BDNF
VWF
APOB
CACNA1S
XDH
PON1
CAV1
MEG3
CRYAB
RNF186
EGF
BRSK2
CAV3
CYP2E1
CRP
LDLR
CYP1A1
NPY
UMOD
UGT1A6
AGER
ACE
OXT
AGR2
CDKN3
TTR
CDKN2A
BRCA1
TF
PCSK1
GRIA1
JPH4
KCNJ5
F2
NOS1
ADRB2
IGF2BP1
SFTPC
PROC
CAMK2B
FKBP10
TXNRD1
CD36
MSRB3
F8
F9
TERT
BCL2L10
GRIN2A
UGT1A10
AGTR1
COMP
CYP1A2
COL2A1
TRPA1

## Sheet: Supplementary table 4
Table SIV. TCGA-LUAD FPKM data and survival information.
sample	OS	X_PATIENT	OS.time
TCGA-NJ-A4YI-01A	1	TCGA-NJ-A4YI	0.0109589
TCGA-55-8506-01A	0	TCGA-55-8506	0.030137
TCGA-NJ-A55O-01A	0	TCGA-NJ-A55O	0.0356164
TCGA-35-3615-01A	0	TCGA-35-3615	0.0383562
TCGA-NJ-A55A-01A	0	TCGA-NJ-A55A	0.0410959
TCGA-97-7938-01A	1	TCGA-97-7938	0.0493151
TCGA-86-8672-01A	1	TCGA-86-8672	0.0520548
TCGA-50-6673-01A	1	TCGA-50-6673	0.060274
TCGA-86-8074-01A	0	TCGA-86-8074	0.0657534
TCGA-55-A493-01A	0	TCGA-55-A493	0.0767123
TCGA-93-A4JO-01A	1	TCGA-93-A4JO	0.090411
TCGA-91-6849-11A	0	TCGA-91-6849	0.0958904
TCGA-91-6849-01A	0	TCGA-91-6849	0.0958904
TCGA-91-8499-01A	0	TCGA-91-8499	0.0986301
TCGA-73-4677-01A	1	TCGA-73-4677	0.10411
TCGA-99-8032-01A	0	TCGA-99-8032	0.120548
TCGA-91-A4BC-01A	0	TCGA-91-A4BC	0.120548
TCGA-55-8616-01A	0	TCGA-55-8616	0.131507
TCGA-NJ-A4YP-01A	0	TCGA-NJ-A4YP	0.136986
TCGA-L9-A5IP-01A	1	TCGA-L9-A5IP	0.158904
TCGA-91-6830-01A	0	TCGA-91-6830	0.164384
TCGA-64-5775-01A	1	TCGA-64-5775	0.169863
TCGA-05-5715-01A	0	TCGA-05-5715	0.169863
TCGA-MP-A4TC-01A	1	TCGA-MP-A4TC	0.20274
TCGA-91-6835-11A	0	TCGA-91-6835	0.216438
TCGA-91-6835-01A	0	TCGA-91-6835	0.216438
TCGA-MN-A4N5-01A	0	TCGA-MN-A4N5	0.230137
TCGA-95-8494-01A	0	TCGA-95-8494	0.230137
TCGA-95-7562-01A	1	TCGA-95-7562	0.238356
TCGA-05-4415-01A	1	TCGA-05-4415	0.249315
TCGA-44-2666-01A	1	TCGA-44-2666	0.265753
TCGA-44-2666-01B	1	TCGA-44-2666	0.265753
TCGA-55-A490-01A	1	TCGA-55-A490	0.271233
TCGA-86-A4D0-01A	1	TCGA-86-A4D0	0.317808
TCGA-55-6975-01A	1	TCGA-55-6975	0.323288
TCGA-55-6975-11A	1	TCGA-55-6975	0.323288
TCGA-55-7727-01A	0	TCGA-55-7727	0.326027
TCGA-50-6591-01A	1	TCGA-50-6591	0.326027
TCGA-05-4250-01A	1	TCGA-05-4250	0.331507
TCGA-86-8055-01A	1	TCGA-86-8055	0.339726
TCGA-69-8255-01A	0	TCGA-69-8255	0.353425
TCGA-73-4670-01A	0	TCGA-73-4670	0.358904
TCGA-38-A44F-01A	0	TCGA-38-A44F	0.364384
TCGA-69-7978-01A	0	TCGA-69-7978	0.367123
TCGA-86-8056-01A	0	TCGA-86-8056	0.380822
TCGA-62-8394-01A	1	TCGA-62-8394	0.380822
TCGA-67-6216-01A	0	TCGA-67-6216	0.386301
TCGA-05-5423-01A	0	TCGA-05-5423	0.413699
TCGA-55-8092-01A	1	TCGA-55-8092	0.421918
TCGA-MP-A4T8-01A	1	TCGA-MP-A4T8	0.441096
TCGA-97-8174-01A	1	TCGA-97-8174	0.449315
TCGA-69-7765-01A	0	TCGA-69-7765	0.452055
TCGA-MP-A4T7-01A	1	TCGA-MP-A4T7	0.457534
TCGA-55-6712-01A	1	TCGA-55-6712	0.468493
TCGA-78-7146-01A	1	TCGA-78-7146	0.473973
TCGA-67-6215-01A	0	TCGA-67-6215	0.476712
TCGA-55-6978-11A	1	TCGA-55-6978	0.482192
TCGA-55-6978-01A	1	TCGA-55-6978	0.482192
TCGA-86-6851-01A	0	TCGA-86-6851	0.490411
TCGA-78-7158-01A	1	TCGA-78-7158	0.490411
TCGA-35-4123-01A	0	TCGA-35-4123	0.49863
TCGA-69-7974-01A	0	TCGA-69-7974	0.50411
TCGA-93-8067-01A	0	TCGA-93-8067	0.509589
TCGA-69-7761-01A	0	TCGA-69-7761	0.509589
TCGA-55-7914-01A	1	TCGA-55-7914	0.512329
TCGA-50-6595-11A	1	TCGA-50-6595	0.517808
TCGA-50-6595-01A	1	TCGA-50-6595	0.517808
TCGA-L9-A443-01A	1	TCGA-L9-A443	0.528767
TCGA-69-7760-01A	0	TCGA-69-7760	0.553425
TCGA-71-8520-01A	1	TCGA-71-8520	0.575342
TCGA-44-7662-01A	0	TCGA-44-7662	0.59726
TCGA-91-6848-01A	0	TCGA-91-6848	0.613699
TCGA-35-4122-01A	0	TCGA-35-4122	0.616438
TCGA-69-7973-01A	0	TCGA-69-7973	0.630137
TCGA-55-6979-11A	1	TCGA-55-6979	0.649315
TCGA-55-6979-01A	1	TCGA-55-6979	0.649315
TCGA-55-7284-01B	1	TCGA-55-7284	0.665753
TCGA-78-7536-01A	1	TCGA-78-7536	0.668493
TCGA-05-4402-01A	1	TCGA-05-4402	0.668493
TCGA-50-5072-01A	1	TCGA-50-5072	0.684932
TCGA-71-6725-01A	0	TCGA-71-6725	0.70137
TCGA-50-5936-01A	1	TCGA-50-5936	0.70411
TCGA-50-5936-11A	1	TCGA-50-5936	0.70411
TCGA-78-7166-01A	1	TCGA-78-7166	0.706849
TCGA-49-AAR9-01A	1	TCGA-49-AAR9	0.712329
TCGA-44-8120-01A	0	TCGA-44-8120	0.712329
TCGA-35-5375-01A	0	TCGA-35-5375	0.723288
TCGA-49-4507-01A	1	TCGA-49-4507	0.734247
TCGA-05-4418-01A	1	TCGA-05-4418	0.750685
TCGA-05-5429-01A	1	TCGA-05-5429	0.753425
TCGA-73-4676-01A	1	TCGA-73-4676	0.769863
TCGA-73-4676-11A	1	TCGA-73-4676	0.769863
TCGA-50-5930-11A	1	TCGA-50-5930	0.772603
TCGA-50-5930-01A	1	TCGA-50-5930	0.772603
TCGA-44-8119-01A	0	TCGA-44-8119	0.780822
TCGA-44-A47B-01A	0	TCGA-44-A47B	0.786301
TCGA-78-7161-01A	1	TCGA-78-7161	0.79726
TCGA-4B-A93V-01A	1	TCGA-4B-A93V	0.821918
TCGA-05-4396-01A	1	TCGA-05-4396	0.830137
TCGA-L9-A444-01A	0	TCGA-L9-A444	0.841096
TCGA-MP-A4TD-01A	1	TCGA-MP-A4TD	0.841096
TCGA-50-7109-01A	1	TCGA-50-7109	0.843836
TCGA-91-6831-01A	0	TCGA-91-6831	0.849315
TCGA-91-6831-11A	0	TCGA-91-6831	0.849315
TCGA-78-8660-01A	1	TCGA-78-8660	0.879452
TCGA-78-7542-01A	1	TCGA-78-7542	0.879452
TCGA-91-6828-01A	0	TCGA-91-6828	0.884932
TCGA-91-6828-11A	0	TCGA-91-6828	0.884932
TCGA-50-6593-01A	1	TCGA-50-6593	0.920548
TCGA-MP-A4TF-01A	1	TCGA-MP-A4TF	0.920548
TCGA-MP-A4TJ-01A	1	TCGA-MP-A4TJ	0.928767
TCGA-73-A9RS-01A	1	TCGA-73-A9RS	0.931507
TCGA-55-7907-01A	1	TCGA-55-7907	0.939726
TCGA-44-A47G-01A	0	TCGA-44-A47G	0.961644
TCGA-86-8585-01A	0	TCGA-86-8585	0.967123
TCGA-38-4631-01A	1	TCGA-38-4631	0.969863
TCGA-49-6761-11A	0	TCGA-49-6761	0.969863
TCGA-49-6761-01A	0	TCGA-49-6761	0.969863
TCGA-05-4422-01A	0	TCGA-05-4422	1
TCGA-50-6594-01A	1	TCGA-50-6594	1.0137
TCGA-91-6840-01A	0	TCGA-91-6840	1.01918
TCGA-55-8620-01A	1	TCGA-55-8620	1.0274
TCGA-86-6562-01A	1	TCGA-86-6562	1.03014
TCGA-95-7944-01A	0	TCGA-95-7944	1.03288
TCGA-49-4490-01A	1	TCGA-49-4490	1.05479
TCGA-49-4490-11A	1	TCGA-49-4490	1.05479
TCGA-44-8117-01A	0	TCGA-44-8117	1.05479
TCGA-67-3774-01A	0	TCGA-67-3774	1.05479
TCGA-69-7979-01A	0	TCGA-69-7979	1.11781
TCGA-44-A4SU-01A	1	TCGA-44-A4SU	1.12055
TCGA-69-8254-01A	0	TCGA-69-8254	1.12055
TCGA-69-7980-01A	0	TCGA-69-7980	1.12603
TCGA-62-A46Y-01A	1	TCGA-62-A46Y	1.13425
TCGA-69-7764-01A	0	TCGA-69-7764	1.13425
TCGA-86-A4P7-01A	0	TCGA-86-A4P7	1.13699
TCGA-44-A4SS-01A	0	TCGA-44-A4SS	1.13699
TCGA-55-8619-01A	0	TCGA-55-8619	1.13973
TCGA-91-6836-11A	0	TCGA-91-6836	1.14247
TCGA-91-6836-01A	0	TCGA-91-6836	1.14247
TCGA-55-8507-01A	0	TCGA-55-8507	1.14521
TCGA-67-6217-01A	0	TCGA-67-6217	1.15616
TCGA-86-8668-01A	0	TCGA-86-8668	1.1589
TCGA-53-7813-01A	0	TCGA-53-7813	1.16164
TCGA-69-8253-01A	0	TCGA-69-8253	1.16712
TCGA-05-4384-01A	0	TCGA-05-4384	1.16712
TCGA-67-3773-01A	0	TCGA-67-3773	1.16986
TCGA-49-4505-01A	1	TCGA-49-4505	1.1726
TCGA-MP-A4TI-01A	1	TCGA-MP-A4TI	1.17534
TCGA-50-5931-11A	1	TCGA-50-5931	1.18904
TCGA-50-5931-01A	1	TCGA-50-5931	1.18904
TCGA-91-8497-01A	1	TCGA-91-8497	1.18904
TCGA-L4-A4E6-01A	0	TCGA-L4-A4E6	1.19178
TCGA-55-6543-01A	0	TCGA-55-6543	1.19178
TCGA-97-8179-01A	0	TCGA-97-8179	1.19178
TCGA-55-8505-01A	0	TCGA-55-8505	1.20548
TCGA-55-A4DF-01A	1	TCGA-55-A4DF	1.20548
TCGA-55-7725-01A	0	TCGA-55-7725	1.21096
TCGA-L9-A50W-01A	1	TCGA-L9-A50W	1.21096
TCGA-86-8359-01A	1	TCGA-86-8359	1.21644
TCGA-62-8398-01A	1	TCGA-62-8398	1.21644
TCGA-55-8615-01A	0	TCGA-55-8615	1.22192
TCGA-67-4679-01B	0	TCGA-67-4679	1.2274
TCGA-38-6178-01A	0	TCGA-38-6178	1.2274
TCGA-05-4417-01A	0	TCGA-05-4417	1.24658
TCGA-05-5420-01A	0	TCGA-05-5420	1.25205
TCGA-05-4434-01A	1	TCGA-05-4434	1.25205
TCGA-50-5939-11A	1	TCGA-50-5939	1.26027
TCGA-50-5939-01A	1	TCGA-50-5939	1.26027
TCGA-55-8087-01A	0	TCGA-55-8087	1.26575
TCGA-55-6970-11A	1	TCGA-55-6970	1.27123
TCGA-55-6970-01A	1	TCGA-55-6970	1.27123
TCGA-44-A47A-01A	0	TCGA-44-A47A	1.27671
TCGA-73-4668-01A	0	TCGA-73-4668	1.27945
TCGA-55-7816-01A	1	TCGA-55-7816	1.28219
TCGA-97-8176-01A	1	TCGA-97-8176	1.28219
TCGA-55-8299-01A	1	TCGA-55-8299	1.28493
TCGA-L9-A8F4-01A	0	TCGA-L9-A8F4	1.30411
TCGA-95-7948-01A	0	TCGA-95-7948	1.30411
TCGA-55-8097-01A	0	TCGA-55-8097	1.30411
TCGA-95-7947-01A	0	TCGA-95-7947	1.30685
TCGA-55-8302-01A	0	TCGA-55-8302	1.30959
TCGA-50-5051-01A	1	TCGA-50-5051	1.30959
TCGA-55-A494-01A	0	TCGA-55-A494	1.31781
TCGA-97-7941-01A	0	TCGA-97-7941	1.32603
TCGA-44-A479-01A	0	TCGA-44-A479	1.33151
TCGA-55-7573-01A	0	TCGA-55-7573	1.33425
TCGA-49-6742-11A	1	TCGA-49-6742	1.33699
TCGA-49-6742-01A	1	TCGA-49-6742	1.33699
TCGA-91-7771-01A	0	TCGA-91-7771	1.34795
TCGA-97-8177-01A	0	TCGA-97-8177	1.36712
TCGA-44-6779-01A	1	TCGA-44-6779	1.36986
TCGA-95-7043-01A	1	TCGA-95-7043	1.37808
TCGA-91-8496-01A	0	TCGA-91-8496	1.38356
TCGA-S2-AA1A-01A	0	TCGA-S2-AA1A	1.40548
TCGA-55-8621-01A	0	TCGA-55-8621	1.41096
TCGA-55-8204-01A	0	TCGA-55-8204	1.41096
TCGA-55-8514-01A	0	TCGA-55-8514	1.42466
TCGA-49-6745-01A	0	TCGA-49-6745	1.43014
TCGA-49-6745-11A	0	TCGA-49-6745	1.43014
TCGA-93-A4JQ-01A	0	TCGA-93-A4JQ	1.4411
TCGA-93-7348-01A	0	TCGA-93-7348	1.45479
TCGA-55-8301-01A	0	TCGA-55-8301	1.46301
TCGA-55-8614-01A	0	TCGA-55-8614	1.46849
TCGA-55-7911-01A	0	TCGA-55-7911	1.47123
TCGA-55-8510-01A	0	TCGA-55-8510	1.47671
TCGA-97-A4M3-01A	0	TCGA-97-A4M3	1.47945
TCGA-55-8094-01A	0	TCGA-55-8094	1.48219
TCGA-97-8172-01A	0	TCGA-97-8172	1.49315
TCGA-55-A57B-01A	0	TCGA-55-A57B	1.49589
TCGA-55-8203-01A	0	TCGA-55-8203	1.49863
TCGA-J2-A4AD-01A	1	TCGA-J2-A4AD	1.50685
TCGA-97-8175-01A	0	TCGA-97-8175	1.50959
TCGA-55-8511-01A	0	TCGA-55-8511	1.51233
TCGA-95-A4VN-01A	0	TCGA-95-A4VN	1.51507
TCGA-44-7661-01A	1	TCGA-44-7661	1.52603
TCGA-55-7913-01B	1	TCGA-55-7913	1.53699
TCGA-97-7937-01A	0	TCGA-97-7937	1.54521
TCGA-L9-A7SV-01A	0	TCGA-L9-A7SV	1.54795
TCGA-55-7903-01A	0	TCGA-55-7903	1.55342
TCGA-97-A4M6-01A	0	TCGA-97-A4M6	1.55616
TCGA-97-8171-01A	0	TCGA-97-8171	1.55616
TCGA-95-7567-01A	0	TCGA-95-7567	1.55616
TCGA-67-3772-01A	0	TCGA-67-3772	1.56986
TCGA-44-7669-01A	1	TCGA-44-7669	1.5726
TCGA-93-A4JP-01A	0	TCGA-93-A4JP	1.58356
TCGA-05-4403-01A	0	TCGA-05-4403	1.58356
TCGA-L4-A4E5-01A	0	TCGA-L4-A4E5	1.58356
TCGA-MP-A4TK-01A	1	TCGA-MP-A4TK	1.59452
TCGA-78-7147-01A	1	TCGA-78-7147	1.60548
TCGA-69-A59K-01A	0	TCGA-69-A59K	1.61918
TCGA-44-7660-01A	0	TCGA-44-7660	1.62192
TCGA-78-7154-01A	1	TCGA-78-7154	1.62466
TCGA-62-A46P-01A	1	TCGA-62-A46P	1.6274
TCGA-44-6145-11A	0	TCGA-44-6145	1.63014
TCGA-44-6145-01A	0	TCGA-44-6145	1.63014
TCGA-55-A492-01A	0	TCGA-55-A492	1.63288
TCGA-55-8090-01A	1	TCGA-55-8090	1.63836
TCGA-55-8205-01A	0	TCGA-55-8205	1.6411
TCGA-55-8091-01A	0	TCGA-55-8091	1.64384
TCGA-97-A4M1-01A	0	TCGA-97-A4M1	1.64658
TCGA-NJ-A55R-01A	0	TCGA-NJ-A55R	1.65205
TCGA-55-7994-01A	0	TCGA-55-7994	1.65205
TCGA-91-A4BD-01A	0	TCGA-91-A4BD	1.65205
TCGA-86-7954-01A	0	TCGA-86-7954	1.65753
TCGA-95-A4VP-01A	0	TCGA-95-A4VP	1.65753
TCGA-55-8512-01A	1	TCGA-55-8512	1.66301
TCGA-05-4382-01A	0	TCGA-05-4382	1.66301
TCGA-55-A4DG-01A	0	TCGA-55-A4DG	1.66575
TCGA-55-7283-01A	0	TCGA-55-7283	1.66849
TCGA-05-4405-01A	0	TCGA-05-4405	1.67123
TCGA-67-3771-01A	0	TCGA-67-3771	1.67123
TCGA-67-3770-01A	0	TCGA-67-3770	1.67123
TCGA-97-A4LX-01A	0	TCGA-97-A4LX	1.68219
TCGA-NJ-A7XG-01A	0	TCGA-NJ-A7XG	1.69041
TCGA-55-8508-01A	0	TCGA-55-8508	1.69041
TCGA-97-A4M2-01A	0	TCGA-97-A4M2	1.70959
TCGA-50-5044-01A	1	TCGA-50-5044	1.70959
TCGA-86-7714-01A	1	TCGA-86-7714	1.71233
TCGA-78-7148-01A	1	TCGA-78-7148	1.71507
TCGA-55-A491-01A	0	TCGA-55-A491	1.71507
TCGA-97-8552-01A	0	TCGA-97-8552	1.71507
TCGA-64-1677-01A	1	TCGA-64-1677	1.72055
TCGA-97-A4M7-01A	0	TCGA-97-A4M7	1.72329
TCGA-55-A48Y-01A	0	TCGA-55-A48Y	1.72603
TCGA-97-A4M5-01A	0	TCGA-97-A4M5	1.73699
TCGA-55-A48Z-01A	0	TCGA-55-A48Z	1.78356
TCGA-95-A4VK-01A	0	TCGA-95-A4VK	1.78356
TCGA-55-7726-01A	0	TCGA-55-7726	1.7863
TCGA-97-A4M0-01A	0	TCGA-97-A4M0	1.7863
TCGA-50-5935-01A	1	TCGA-50-5935	1.78904
TCGA-50-5935-11A	1	TCGA-50-5935	1.78904
TCGA-86-8358-01A	0	TCGA-86-8358	1.78904
TCGA-99-8033-01A	1	TCGA-99-8033	1.79726
TCGA-97-8547-01A	0	TCGA-97-8547	1.8
TCGA-44-6774-01A	0	TCGA-44-6774	1.80274
TCGA-99-AA5R-01A	0	TCGA-99-AA5R	1.80274
TCGA-L9-A743-01A	0	TCGA-L9-A743	1.81918
TCGA-78-7150-01A	1	TCGA-78-7150	1.82466
TCGA-05-4425-01A	0	TCGA-05-4425	1.83288
TCGA-55-7576-01A	0	TCGA-55-7576	1.83562
TCGA-05-5428-01A	0	TCGA-05-5428	1.83562
TCGA-55-8208-01A	0	TCGA-55-8208	1.84658
TCGA-49-AAQV-01A	1	TCGA-49-AAQV	1.85479
TCGA-49-6767-01A	0	TCGA-49-6767	1.85479
TCGA-93-7347-01A	0	TCGA-93-7347	1.87123
TCGA-55-A48X-01A	0	TCGA-55-A48X	1.88767
TCGA-69-7763-01A	0	TCGA-69-7763	1.89041
TCGA-44-7659-01A	0	TCGA-44-7659	1.89315
TCGA-86-8075-01A	1	TCGA-86-8075	1.90137
TCGA-78-7160-01A	1	TCGA-78-7160	1.90959
TCGA-86-8280-01A	0	TCGA-86-8280	1.92055
TCGA-55-1592-01A	1	TCGA-55-1592	1.92055
TCGA-55-8089-01A	1	TCGA-55-8089	1.92329
TCGA-44-6148-01A	0	TCGA-44-6148	1.92877
TCGA-44-6148-11A	0	TCGA-44-6148	1.92877
TCGA-55-7728-01A	0	TCGA-55-7728	1.92877
TCGA-44-6775-01C	0	TCGA-44-6775	1.93151
TCGA-44-6775-01A	0	TCGA-44-6775	1.93151
TCGA-55-7724-01A	0	TCGA-55-7724	1.93151
TCGA-73-4659-01A	1	TCGA-73-4659	1.94795
TCGA-93-A4JN-01A	0	TCGA-93-A4JN	1.96712
TCGA-44-7672-01A	0	TCGA-44-7672	1.96986
TCGA-55-8096-01A	1	TCGA-55-8096	1.96986
TCGA-44-6144-11A	0	TCGA-44-6144	1.98082
TCGA-J2-8194-01A	0	TCGA-J2-8194	1.98356
TCGA-44-6146-11A	0	TCGA-44-6146	1.99452
TCGA-44-6146-01A	0	TCGA-44-6146	1.99452
TCGA-44-6146-01B	0	TCGA-44-6146	1.99452
TCGA-05-4433-01A	0	TCGA-05-4433	2
TCGA-05-4397-01A	1	TCGA-05-4397	2.00274
TCGA-86-A4JF-01A	1	TCGA-86-A4JF	2.01918
TCGA-J2-8192-01A	0	TCGA-J2-8192	2.02466
TCGA-86-8073-01A	0	TCGA-86-8073	2.0274
TCGA-MP-A4TH-01A	0	TCGA-MP-A4TH	2.03014
TCGA-99-7458-01A	0	TCGA-99-7458	2.04658
TCGA-55-6984-11A	1	TCGA-55-6984	2.08219
TCGA-55-6984-01A	1	TCGA-55-6984	2.08219
TCGA-05-4432-01A	0	TCGA-05-4432	2.08493
TCGA-44-2668-01A	1	TCGA-44-2668	2.08493
TCGA-44-2668-01B	1	TCGA-44-2668	2.08493
TCGA-44-2668-11A	1	TCGA-44-2668	2.08493
TCGA-05-4430-01A	0	TCGA-05-4430	2.08493
TCGA-55-7815-01A	0	TCGA-55-7815	2.11781
TCGA-97-7554-01A	0	TCGA-97-7554	2.12329
TCGA-50-6592-01A	1	TCGA-50-6592	2.12877
TCGA-05-4426-01A	0	TCGA-05-4426	2.16712
TCGA-55-8513-01A	0	TCGA-55-8513	2.16712
TCGA-78-7539-01A	0	TCGA-78-7539	2.16712
TCGA-05-4427-01A	0	TCGA-05-4427	2.16712
TCGA-38-7271-01A	1	TCGA-38-7271	2.19178
TCGA-73-4666-01A	0	TCGA-73-4666	2.19178
TCGA-86-A4P8-01A	0	TCGA-86-A4P8	2.20548
TCGA-86-8674-01A	0	TCGA-86-8674	2.20822
TCGA-78-7220-01A	1	TCGA-78-7220	2.21096
TCGA-44-4112-01B	1	TCGA-44-4112	2.2137
TCGA-44-4112-01A	1	TCGA-44-4112	2.2137
TCGA-69-8453-01A	0	TCGA-69-8453	2.2274
TCGA-83-5908-01A	0	TCGA-83-5908	2.25753
TCGA-55-7570-01A	0	TCGA-55-7570	2.25753
TCGA-78-7145-01A	1	TCGA-78-7145	2.26301
TCGA-MN-A4N1-01A	0	TCGA-MN-A4N1	2.26575
TCGA-50-8460-01A	0	TCGA-50-8460	2.27123
TCGA-95-8039-01A	0	TCGA-95-8039	2.27397
TCGA-86-8671-01A	0	TCGA-86-8671	2.29863
TCGA-91-6847-01A	0	TCGA-91-6847	2.30685
TCGA-91-6847-11A	0	TCGA-91-6847	2.30685
TCGA-44-6147-11A	0	TCGA-44-6147	2.31507
TCGA-44-6147-01A	0	TCGA-44-6147	2.31507
TCGA-44-6147-01B	0	TCGA-44-6147	2.31507
TCGA-44-5645-11A	0	TCGA-44-5645	2.33425
TCGA-44-5645-01B	0	TCGA-44-5645	2.33425
TCGA-44-5645-01A	0	TCGA-44-5645	2.33425
TCGA-49-4487-01A	1	TCGA-49-4487	2.34247
TCGA-86-8673-01A	0	TCGA-86-8673	2.36164
TCGA-44-5644-01A	0	TCGA-44-5644	2.36438
TCGA-64-5779-01A	0	TCGA-64-5779	2.36712
TCGA-38-4629-01A	1	TCGA-38-4629	2.36712
TCGA-64-5815-01A	0	TCGA-64-5815	2.3726
TCGA-49-4488-01A	1	TCGA-49-4488	2.38082
TCGA-55-7281-01A	0	TCGA-55-7281	2.38904
TCGA-49-AAR4-01A	1	TCGA-49-AAR4	2.40822
TCGA-44-7670-01A	0	TCGA-44-7670	2.41644
TCGA-05-5425-01A	0	TCGA-05-5425	2.41644
TCGA-55-8206-01A	0	TCGA-55-8206	2.43288
TCGA-44-7671-01A	0	TCGA-44-7671	2.43562
TCGA-55-7995-01A	0	TCGA-55-7995	2.43562
TCGA-49-4510-01A	1	TCGA-49-4510	2.45479
TCGA-MP-A4TE-01A	1	TCGA-MP-A4TE	2.45479
TCGA-86-A456-01A	0	TCGA-86-A456	2.45479
TCGA-55-8085-01A	0	TCGA-55-8085	2.47671
TCGA-49-4512-11A	1	TCGA-49-4512	2.47945
TCGA-49-4512-01A	1	TCGA-49-4512	2.47945
TCGA-62-A472-01A	0	TCGA-62-A472	2.49315
TCGA-05-4420-01A	0	TCGA-05-4420	2.49863
TCGA-05-4424-01A	0	TCGA-05-4424	2.50137
TCGA-73-4675-01A	1	TCGA-73-4675	2.52603
TCGA-53-7626-01A	1	TCGA-53-7626	2.54521
TCGA-55-5899-01A	0	TCGA-55-5899	2.54795
TCGA-86-8669-01A	0	TCGA-86-8669	2.56986
TCGA-86-8278-01A	0	TCGA-86-8278	2.5863
TCGA-86-7701-01A	0	TCGA-86-7701	2.59452
TCGA-86-8279-01A	0	TCGA-86-8279	2.6
TCGA-78-7535-01A	1	TCGA-78-7535	2.6
TCGA-MP-A4TA-01A	1	TCGA-MP-A4TA	2.60274
TCGA-55-7227-01A	1	TCGA-55-7227	2.60822
TCGA-78-7156-01A	1	TCGA-78-7156	2.67397
TCGA-55-8207-01A	0	TCGA-55-8207	2.67671
TCGA-44-6777-01A	1	TCGA-44-6777	2.70411
TCGA-44-6777-11A	1	TCGA-44-6777	2.70411
TCGA-J2-A4AG-01A	0	TCGA-J2-A4AG	2.70685
TCGA-86-8076-01A	0	TCGA-86-8076	2.72055
TCGA-55-7574-01A	1	TCGA-55-7574	2.72603
TCGA-55-6982-01A	1	TCGA-55-6982	2.72603
TCGA-55-6982-11A	1	TCGA-55-6982	2.72603
TCGA-86-7953-01A	0	TCGA-86-7953	2.73151
TCGA-49-4506-01A	1	TCGA-49-4506	2.73699
TCGA-44-5643-01A	0	TCGA-44-5643	2.77534
TCGA-44-3919-01A	1	TCGA-44-3919	2.81096
TCGA-44-3918-01B	0	TCGA-44-3918	2.83836
TCGA-44-3918-01A	0	TCGA-44-3918	2.83836
TCGA-55-7910-01A	0	TCGA-55-7910	2.84932
TCGA-53-7624-01A	1	TCGA-53-7624	2.85753
TCGA-86-7711-01A	1	TCGA-86-7711	2.86575
TCGA-99-8025-01A	0	TCGA-99-8025	2.90411
TCGA-53-A4EZ-01A	0	TCGA-53-A4EZ	2.93425
TCGA-86-7955-01A	0	TCGA-86-7955	2.93699
TCGA-38-4630-01A	1	TCGA-38-4630	2.93973
TCGA-J2-A4AE-01A	0	TCGA-J2-A4AE	2.95616
TCGA-49-4494-01A	1	TCGA-49-4494	2.96164
TCGA-44-7667-01A	0	TCGA-44-7667	3.00548
TCGA-75-6214-01A	1	TCGA-75-6214	3.05479
TCGA-99-8028-01A	0	TCGA-99-8028	3.06301
TCGA-50-8459-01A	0	TCGA-50-8459	3.06575
TCGA-50-8457-01A	0	TCGA-50-8457	3.08219
TCGA-64-1680-01A	0	TCGA-64-1680	3.08493
TCGA-05-4390-01A	0	TCGA-05-4390	3.08493
TCGA-44-3396-11A	0	TCGA-44-3396	3.09589
TCGA-44-3396-01A	0	TCGA-44-3396	3.09589
TCGA-49-AARN-01A	1	TCGA-49-AARN	3.10959
TCGA-38-4627-01A	1	TCGA-38-4627	3.14247
TCGA-38-4627-11A	1	TCGA-38-4627	3.14247
TCGA-86-8054-01A	0	TCGA-86-8054	3.14521
TCGA-86-7713-01A	0	TCGA-86-7713	3.16986
TCGA-44-2661-01A	0	TCGA-44-2661	3.17534
TCGA-44-2661-11A	0	TCGA-44-2661	3.17534
TCGA-44-3398-01A	0	TCGA-44-3398	3.1863
TCGA-44-3398-11B	0	TCGA-44-3398	3.1863
TCGA-64-1681-01A	1	TCGA-64-1681	3.19726
TCGA-78-7155-01A	1	TCGA-78-7155	3.20822
TCGA-MN-A4N4-01A	0	TCGA-MN-A4N4	3.21918
TCGA-55-1594-01A	0	TCGA-55-1594	3.2274
TCGA-44-3917-01A	0	TCGA-44-3917	3.2411
TCGA-44-3917-01B	0	TCGA-44-3917	3.2411
TCGA-73-7498-01A	0	TCGA-73-7498	3.25753
TCGA-64-1678-01A	0	TCGA-64-1678	3.25753
TCGA-62-A470-01A	1	TCGA-62-A470	3.27123
TCGA-78-7540-01A	1	TCGA-78-7540	3.27945
TCGA-78-8648-01A	1	TCGA-78-8648	3.31233
TCGA-78-7152-01A	1	TCGA-78-7152	3.32877
TCGA-62-8395-01A	0	TCGA-62-8395	3.33151
TCGA-49-AARE-01A	1	TCGA-49-AARE	3.36712
TCGA-55-6985-11A	0	TCGA-55-6985	3.37808
TCGA-55-6985-01A	0	TCGA-55-6985	3.37808
TCGA-50-5932-11A	1	TCGA-50-5932	3.38356
TCGA-50-5932-01A	1	TCGA-50-5932	3.38356
TCGA-55-6969-11A	0	TCGA-55-6969	3.39452
TCGA-62-A471-01A	0	TCGA-62-A471	3.4137
TCGA-91-6829-01A	1	TCGA-91-6829	3.44658
TCGA-91-6829-11A	1	TCGA-91-6829	3.44658
TCGA-MP-A4T9-01A	1	TCGA-MP-A4T9	3.46575
TCGA-50-6597-01A	1	TCGA-50-6597	3.47397
TCGA-95-7039-01A	0	TCGA-95-7039	3.48493
TCGA-44-2662-01A	0	TCGA-44-2662	3.50685
TCGA-44-2662-01B	0	TCGA-44-2662	3.50685
TCGA-44-2662-11A	0	TCGA-44-2662	3.50685
TCGA-97-7546-01A	0	TCGA-97-7546	3.52055
TCGA-50-6590-01A	1	TCGA-50-6590	3.52877
TCGA-62-8397-01A	0	TCGA-62-8397	3.53151
TCGA-55-6968-01A	1	TCGA-55-6968	3.54247
TCGA-55-6968-11A	1	TCGA-55-6968	3.54247
TCGA-44-2665-11A	0	TCGA-44-2665	3.56438
TCGA-44-2665-01A	0	TCGA-44-2665	3.56438
TCGA-64-5778-01A	0	TCGA-64-5778	3.57534
TCGA-44-2655-01A	0	TCGA-44-2655	3.6274
TCGA-44-2655-11A	0	TCGA-44-2655	3.6274
TCGA-75-5147-01A	0	TCGA-75-5147	3.65205
TCGA-44-2657-01A	0	TCGA-44-2657	3.70137
TCGA-44-2657-11A	0	TCGA-44-2657	3.70137
TCGA-38-4632-01A	1	TCGA-38-4632	3.71781
TCGA-38-4632-11A	1	TCGA-38-4632	3.71781
TCGA-44-2659-01A	0	TCGA-44-2659	3.74521
TCGA-05-4389-01A	0	TCGA-05-4389	3.75068
TCGA-55-6981-01A	1	TCGA-55-6981	3.77808
TCGA-55-6981-11A	1	TCGA-55-6981	3.77808
TCGA-55-6971-11A	0	TCGA-55-6971	3.83562
TCGA-55-6971-01A	0	TCGA-55-6971	3.83562
TCGA-49-4501-01A	1	TCGA-49-4501	3.89315
TCGA-44-2656-01A	0	TCGA-44-2656	3.91507
TCGA-44-2656-01B	0	TCGA-44-2656	3.91507
TCGA-05-4398-01A	0	TCGA-05-4398	3.92055
TCGA-NJ-A4YQ-01A	0	TCGA-NJ-A4YQ	3.92329
TCGA-50-5066-01A	0	TCGA-50-5066	3.95068
TCGA-50-5066-02A	0	TCGA-50-5066	3.95068
TCGA-62-A46O-01A	1	TCGA-62-A46O	3.98356
TCGA-50-5941-01A	0	TCGA-50-5941	4.03836
TCGA-38-4628-01A	1	TCGA-38-4628	4.08767
TCGA-62-8402-01A	1	TCGA-62-8402	4.10411
TCGA-50-5068-01A	1	TCGA-50-5068	4.10685
TCGA-MP-A4SY-01A	1	TCGA-MP-A4SY	4.11233
TCGA-75-6212-01A	1	TCGA-75-6212	4.15342
TCGA-05-4249-01A	0	TCGA-05-4249	4.1726
TCGA-78-7633-01A	1	TCGA-78-7633	4.1863
TCGA-73-7499-01A	1	TCGA-73-7499	4.19452
TCGA-64-5781-01A	0	TCGA-64-5781	4.27123
TCGA-73-4658-01A	1	TCGA-73-4658	4.38356
TCGA-50-5946-02A	0	TCGA-50-5946	4.43014
TCGA-50-5946-01A	0	TCGA-50-5946	4.43014
TCGA-49-6743-11A	0	TCGA-49-6743	4.4411
TCGA-49-6743-01A	0	TCGA-49-6743	4.4411
TCGA-78-7537-01A	1	TCGA-78-7537	4.44384
TCGA-55-6972-11A	1	TCGA-55-6972	4.47123
TCGA-55-6972-01A	1	TCGA-55-6972	4.47123
TCGA-62-A46S-01A	1	TCGA-62-A46S	4.52877
TCGA-49-6744-01A	0	TCGA-49-6744	4.61096
TCGA-49-6744-11A	0	TCGA-49-6744	4.61096
TCGA-49-4514-01A	0	TCGA-49-4514	4.65753
TCGA-62-A46R-01A	1	TCGA-62-A46R	4.72603
TCGA-64-1676-01A	0	TCGA-64-1676	4.73425
TCGA-50-5944-01A	0	TCGA-50-5944	4.79452
TCGA-MP-A4SW-01A	1	TCGA-MP-A4SW	4.87123
TCGA-MP-A4T6-01A	1	TCGA-MP-A4T6	4.90411
TCGA-O1-A52J-01A	1	TCGA-O1-A52J	4.92603
TCGA-50-5055-01A	1	TCGA-50-5055	5.0137
TCGA-50-5942-01A	0	TCGA-50-5942	5.06027
TCGA-44-6778-11A	0	TCGA-44-6778	5.10685
TCGA-44-6778-01A	0	TCGA-44-6778	5.10685
TCGA-97-7553-01A	0	TCGA-97-7553	5.12329
TCGA-49-AAR3-01A	0	TCGA-49-AAR3	5.1863
TCGA-97-7552-01A	0	TCGA-97-7552	5.29315
TCGA-97-7547-01A	0	TCGA-97-7547	5.38356
TCGA-78-7159-01A	0	TCGA-78-7159	5.40822
TCGA-75-5125-01A	1	TCGA-75-5125	5.55342
TCGA-55-1596-01A	0	TCGA-55-1596	5.65753
TCGA-55-6980-01A	0	TCGA-55-6980	5.77808
TCGA-55-6980-11A	0	TCGA-55-6980	5.77808
TCGA-55-6987-01A	0	TCGA-55-6987	5.85479
TCGA-NJ-A4YF-01A	0	TCGA-NJ-A4YF	5.92055
TCGA-50-5045-01A	1	TCGA-50-5045	5.95616
TCGA-62-A46V-01A	0	TCGA-62-A46V	6.02466
TCGA-49-AAR2-01A	0	TCGA-49-AAR2	6.09315
TCGA-MP-A5C7-01A	0	TCGA-MP-A5C7	6.1589
TCGA-NJ-A4YG-01A	0	TCGA-NJ-A4YG	6.19452
TCGA-49-4486-01A	1	TCGA-49-4486	6.35068
TCGA-78-8655-01A	0	TCGA-78-8655	6.46575
TCGA-75-5146-01A	0	TCGA-75-5146	6.48767
TCGA-50-5933-11A	1	TCGA-50-5933	6.55616
TCGA-50-5933-01A	1	TCGA-50-5933	6.55616
TCGA-55-6642-01A	0	TCGA-55-6642	6.70959
TCGA-64-1679-01A	0	TCGA-64-1679	6.81644
TCGA-73-4662-01A	0	TCGA-73-4662	6.89041
TCGA-75-6206-01A	0	TCGA-75-6206	7.09589
TCGA-80-5611-01A	0	TCGA-80-5611	7.10959
TCGA-44-6776-01A	0	TCGA-44-6776	7.16712
TCGA-44-6776-11A	0	TCGA-44-6776	7.16712
TCGA-MP-A4T4-01A	1	TCGA-MP-A4T4	7.16986
TCGA-MP-A4SV-01A	1	TCGA-MP-A4SV	7.17808
TCGA-64-5774-01A	0	TCGA-64-5774	7.33151
TCGA-78-7167-01A	1	TCGA-78-7167	7.34521
TCGA-62-8399-01A	0	TCGA-62-8399	7.3863
TCGA-55-6983-01A	0	TCGA-55-6983	7.73425
TCGA-55-6983-11A	0	TCGA-55-6983	7.73425
TCGA-80-5608-01A	0	TCGA-80-5608	7.7589
TCGA-38-4625-01A	0	TCGA-38-4625	8.14521
TCGA-38-4625-11A	0	TCGA-38-4625	8.14521
TCGA-75-7027-01A	0	TCGA-75-7027	8.38082
TCGA-50-5049-01A	0	TCGA-50-5049	8.47671
TCGA-78-7162-01A	1	TCGA-78-7162	8.68219
TCGA-55-6986-11A	0	TCGA-55-6986	8.93425
TCGA-55-6986-01A	0	TCGA-55-6986	8.93425
TCGA-75-7025-01A	0	TCGA-75-7025	9.05479
TCGA-78-8662-01A	1	TCGA-78-8662	9.20822
TCGA-78-7153-01A	0	TCGA-78-7153	9.9589
TCGA-38-4626-01A	0	TCGA-38-4626	10.0658
TCGA-38-4626-11A	0	TCGA-38-4626	10.0658
TCGA-49-AARO-01A	0	TCGA-49-AARO	10.2986
TCGA-78-7149-01A	0	TCGA-78-7149	10.7945
TCGA-49-AAR0-01A	0	TCGA-49-AAR0	13.0548
TCGA-78-7143-01A	1	TCGA-78-7143	13.5918
TCGA-49-AARR-01A	0	TCGA-49-AARR	13.6767
TCGA-49-AARQ-01A	0	TCGA-49-AARQ	18.4438
TCGA-78-8640-01A	0	TCGA-78-8640	19.3479
TCGA-78-7163-01A	0	TCGA-78-7163	19.8575

## Sheet: Supplementary table 5
Table SV. Bulk RNA sequencing data.
Sample	Cluster
TCGA-05-4250-01A	1
TCGA-64-5774-01A	1
TCGA-97-7937-01A	1
TCGA-44-A4SU-01A	1
TCGA-78-7155-01A	1
TCGA-78-7163-01A	1
TCGA-55-7574-01A	1
TCGA-78-7535-01A	1
TCGA-55-8619-01A	1
TCGA-95-7567-01A	1
TCGA-55-6979-11A	1
TCGA-NJ-A7XG-01A	1
TCGA-44-8117-01A	1
TCGA-62-8402-01A	1
TCGA-49-4507-01A	1
TCGA-J2-A4AD-01A	1
TCGA-55-A490-01A	1
TCGA-55-A48Y-01A	1
TCGA-44-3918-01A	1
TCGA-55-A494-01A	1
TCGA-50-5931-11A	1
TCGA-49-AARQ-01A	1
TCGA-95-8494-01A	1
TCGA-55-7726-01A	1
TCGA-44-6147-11A	1
TCGA-78-8660-01A	1
TCGA-49-4490-01A	1
TCGA-J2-8194-01A	1
TCGA-44-2659-01A	1
TCGA-78-7633-01A	1
TCGA-55-8299-01A	1
TCGA-MP-A4T6-01A	1
TCGA-55-A48Z-01A	1
TCGA-99-AA5R-01A	1
TCGA-49-6761-11A	1
TCGA-78-7146-01A	1
TCGA-95-7948-01A	1
TCGA-55-7570-01A	1
TCGA-50-5072-01A	1
TCGA-91-8499-01A	1
TCGA-86-8671-01A	1
TCGA-91-6829-01A	1
TCGA-05-5428-01A	1
TCGA-78-7145-01A	1
TCGA-69-7973-01A	1
TCGA-50-5936-11A	1
TCGA-80-5611-01A	1
TCGA-91-6849-01A	1
TCGA-49-AAR9-01A	1
TCGA-86-8669-01A	1
TCGA-86-8279-01A	1
TCGA-75-6206-01A	1
TCGA-49-6744-01A	1
TCGA-44-A47B-01A	1
TCGA-73-4676-01A	1
TCGA-4B-A93V-01A	1
TCGA-78-7160-01A	1
TCGA-44-2656-01A	1
TCGA-L4-A4E5-01A	1
TCGA-78-7161-01A	1
TCGA-05-4426-01A	1
TCGA-44-6145-11A	1
TCGA-44-8120-01A	1
TCGA-91-6836-11A	1
TCGA-86-7713-01A	1
TCGA-67-3773-01A	1
TCGA-44-A479-01A	1
TCGA-05-4422-01A	1
TCGA-05-4390-01A	1
TCGA-91-6830-01A	1
TCGA-44-7669-01A	1
TCGA-50-5066-01A	1
TCGA-64-5815-01A	1
TCGA-50-5939-01A	1
TCGA-MP-A4TA-01A	1
TCGA-44-5645-01B	1
TCGA-64-1677-01A	1
TCGA-44-2662-01A	1
TCGA-44-6775-01A	1
TCGA-38-4632-01A	1
TCGA-55-8092-01A	1
TCGA-MP-A4TI-01A	1
TCGA-05-4418-01A	1
TCGA-MN-A4N4-01A	1
TCGA-55-8507-01A	1
TCGA-86-8668-01A	1
TCGA-05-5425-01A	1
TCGA-49-4510-01A	1
TCGA-55-6979-01A	1
TCGA-78-7158-01A	1
TCGA-97-8547-01A	1
TCGA-78-7153-01A	1
TCGA-35-4122-01A	1
TCGA-44-3918-01B	1
TCGA-49-6761-01A	1
TCGA-91-7771-01A	1
TCGA-69-8253-01A	1
TCGA-49-4490-11A	1
TCGA-62-8394-01A	1
TCGA-49-6743-01A	1
TCGA-38-4625-01A	1
TCGA-05-4417-01A	1
TCGA-97-A4M3-01A	1
TCGA-44-2668-01A	1
TCGA-71-8520-01A	1
TCGA-75-5125-01A	1
TCGA-86-7711-01A	1
TCGA-44-2656-01B	1
TCGA-L4-A4E6-01A	1
TCGA-50-7109-01A	1
TCGA-L9-A50W-01A	1
TCGA-55-8094-01A	1
TCGA-78-7149-01A	1
TCGA-55-7724-01A	1
TCGA-86-8674-01A	1
TCGA-05-5420-01A	1
TCGA-44-8119-01A	1
TCGA-55-6971-11A	1
TCGA-55-7994-01A	1
TCGA-55-8508-01A	1
TCGA-50-5933-01A	1
TCGA-55-6970-11A	1
TCGA-NJ-A4YI-01A	1
TCGA-91-A4BC-01A	1
TCGA-78-7220-01A	1
TCGA-05-4382-01A	1
TCGA-86-8278-01A	1
TCGA-NJ-A55R-01A	1
TCGA-91-8496-01A	1
TCGA-64-5775-01A	1
TCGA-44-7661-01A	1
TCGA-49-4486-01A	1
TCGA-05-4427-01A	1
TCGA-MP-A4TE-01A	1
TCGA-49-AAR2-01A	1
TCGA-86-7953-01A	1
TCGA-86-8055-01A	1
TCGA-44-2665-11A	1
TCGA-55-5899-01A	1
TCGA-78-8655-01A	1
TCGA-05-4420-01A	1
TCGA-55-8505-01A	1
TCGA-38-6178-01A	1
TCGA-55-6987-01A	1
TCGA-49-4494-01A	1
TCGA-55-6543-01A	1
TCGA-64-1678-01A	1
TCGA-S2-AA1A-01A	1
TCGA-69-7761-01A	1
TCGA-86-8672-01A	1
TCGA-44-5644-01A	1
TCGA-49-4506-01A	1
TCGA-MP-A4SV-01A	1
TCGA-MN-A4N1-01A	1
TCGA-35-4123-01A	1
TCGA-49-4501-01A	1
TCGA-44-2655-01A	1
TCGA-78-7148-01A	1
TCGA-44-6145-01A	1
TCGA-55-8615-01A	1
TCGA-73-4676-11A	1
TCGA-38-4626-01A	1
TCGA-55-6981-01A	1
TCGA-97-7554-01A	1
TCGA-67-6216-01A	1
TCGA-97-8176-01A	1
TCGA-55-A493-01A	1
TCGA-62-A46S-01A	1
TCGA-55-6968-01A	1
TCGA-55-8514-01A	1
TCGA-55-7911-01A	1
TCGA-73-4658-01A	1
TCGA-44-6778-01A	1
TCGA-62-8397-01A	1
TCGA-50-6595-01A	1
TCGA-L9-A444-01A	1
TCGA-64-5779-01A	1
TCGA-44-7660-01A	1
TCGA-44-2666-01A	1
TCGA-49-4512-11A	1
TCGA-44-6146-11A	1
TCGA-44-6777-01A	1
TCGA-73-4675-01A	1
TCGA-55-7903-01A	1
TCGA-38-4627-11A	1
TCGA-99-8033-01A	1
TCGA-55-1594-01A	1
TCGA-55-6980-01A	1
TCGA-95-A4VK-01A	1
TCGA-NJ-A55O-01A	1
TCGA-95-7043-01A	1
TCGA-44-7672-01A	1
TCGA-44-6146-01B	1
TCGA-67-3771-01A	1
TCGA-53-A4EZ-01A	1
TCGA-99-8032-01A	1
TCGA-73-4670-01A	1
TCGA-55-7576-01A	1
TCGA-49-6743-11A	1
TCGA-75-7027-01A	1
TCGA-62-A472-01A	1
TCGA-78-7154-01A	1
TCGA-50-5044-01A	1
TCGA-95-A4VP-01A	1
TCGA-91-6831-01A	1
TCGA-55-6642-01A	1
TCGA-L9-A5IP-01A	1
TCGA-97-7546-01A	1
TCGA-97-7547-01A	1
TCGA-55-7914-01A	1
TCGA-55-8205-01A	1
TCGA-05-4415-01A	1
TCGA-86-8585-01A	1
TCGA-55-8203-01A	1
TCGA-71-6725-01A	1
TCGA-55-7816-01A	1
TCGA-55-1592-01A	1
TCGA-97-8175-01A	1
TCGA-86-7954-01A	1
TCGA-78-8662-01A	1
TCGA-MP-A4TF-01A	1
TCGA-MP-A4T7-01A	1
TCGA-44-5645-01A	1
TCGA-55-8506-01A	1
TCGA-50-6591-01A	1
TCGA-91-6831-11A	1
TCGA-78-7159-01A	1
TCGA-55-8085-01A	1
TCGA-62-A471-01A	1
TCGA-91-6840-01A	1
TCGA-44-3917-01B	1
TCGA-73-7498-01A	1
TCGA-55-8206-01A	1
TCGA-97-8179-01A	1
TCGA-50-6590-01A	1
TCGA-49-6742-01A	1
TCGA-64-1679-01A	1
TCGA-MP-A4TH-01A	1
TCGA-44-6144-11A	1
TCGA-50-5930-11A	1
TCGA-50-5066-02A	1
TCGA-62-A46P-01A	1
TCGA-38-4626-11A	1
TCGA-38-4632-11A	1
TCGA-75-6212-01A	1
TCGA-44-6146-01A	1
TCGA-55-7913-01B	1
TCGA-78-7166-01A	1
TCGA-93-A4JN-01A	1
TCGA-55-6975-11A	1
TCGA-38-4627-01A	1
TCGA-55-6975-01A	1
TCGA-62-A46V-01A	1
TCGA-50-6594-01A	1
TCGA-49-AAR3-01A	1
TCGA-49-6744-11A	1
TCGA-86-7955-01A	1
TCGA-55-A4DG-01A	1
TCGA-93-A4JP-01A	1
TCGA-78-7150-01A	1
TCGA-97-8177-01A	1
TCGA-50-5946-01A	1
TCGA-78-8648-01A	1
TCGA-44-6778-11A	1
TCGA-78-8640-01A	1
TCGA-50-5935-01A	1
TCGA-69-7978-01A	1
TCGA-86-8054-01A	1
TCGA-44-3398-01A	1
TCGA-NJ-A4YG-01A	1
TCGA-78-7537-01A	1
TCGA-38-4629-01A	1
TCGA-69-7760-01A	1
TCGA-55-7284-01B	1
TCGA-55-A4DF-01A	1
TCGA-86-A456-01A	1
TCGA-44-7667-01A	1
TCGA-86-A4P8-01A	1
TCGA-80-5608-01A	1
TCGA-86-6851-01A	1
TCGA-55-6970-01A	1
TCGA-05-4384-01A	1
TCGA-MP-A4TC-01A	1
TCGA-91-6828-01A	1
TCGA-55-8302-01A	1
TCGA-55-8087-01A	1
TCGA-38-4631-01A	1
TCGA-NJ-A4YF-01A	1
TCGA-55-7815-01A	1
TCGA-55-8620-01A	1
TCGA-50-5941-01A	1
TCGA-78-7539-01A	1
TCGA-55-8301-01A	1
TCGA-50-5939-11A	1
TCGA-73-A9RS-01A	1
TCGA-44-2665-01A	1
TCGA-L9-A8F4-01A	1
TCGA-86-8673-01A	1
TCGA-86-8074-01A	1
TCGA-86-A4D0-01A	1
TCGA-MP-A4T8-01A	1
TCGA-93-A4JQ-01A	1
TCGA-44-2666-01B	1
TCGA-69-7764-01A	1
TCGA-86-7701-01A	1
TCGA-55-7727-01A	1
TCGA-97-7938-01A	1
TCGA-67-6215-01A	1
TCGA-MP-A4T9-01A	1
TCGA-05-5429-01A	1
TCGA-91-6847-01A	1
TCGA-44-A4SS-01A	1
TCGA-55-8097-01A	1
TCGA-97-8171-01A	1
TCGA-55-8089-01A	1
TCGA-05-4424-01A	1
TCGA-62-8395-01A	1
TCGA-53-7624-01A	1
TCGA-64-1676-01A	1
TCGA-55-1596-01A	1
TCGA-97-8174-01A	1
TCGA-38-4630-01A	1
TCGA-49-6767-01A	1
TCGA-05-4397-01A	1
TCGA-55-7910-01A	1
TCGA-J2-A4AG-01A	1
TCGA-50-5936-01A	1
TCGA-44-4112-01B	1
TCGA-05-5715-01A	1
TCGA-44-5643-01A	1
TCGA-NJ-A4YQ-01A	1
TCGA-55-7995-01A	1
TCGA-44-2662-01B	1
TCGA-55-6712-01A	1
TCGA-44-4112-01A	1
TCGA-55-6972-01A	1
TCGA-44-3919-01A	1
TCGA-J2-8192-01A	1
TCGA-44-A47A-01A	1
TCGA-75-5147-01A	1
TCGA-86-A4JF-01A	1
TCGA-55-6985-11A	1
TCGA-95-7039-01A	1
TCGA-NJ-A4YP-01A	1
TCGA-62-A46O-01A	1
TCGA-73-4668-01A	1
TCGA-05-4433-01A	1
TCGA-78-7156-01A	1
TCGA-05-4396-01A	1
TCGA-78-7152-01A	1
TCGA-64-5781-01A	1
TCGA-55-7227-01A	1
TCGA-78-7542-01A	1
TCGA-44-2662-11A	1
TCGA-O1-A52J-01A	1
TCGA-05-4425-01A	1
TCGA-73-4659-01A	1
TCGA-35-5375-01A	1
TCGA-44-2668-01B	1
TCGA-86-6562-01A	1
TCGA-86-8358-01A	1
TCGA-50-5932-11A	1
TCGA-44-6776-01A	1
TCGA-95-7944-01A	1
TCGA-MP-A4SW-01A	1
TCGA-49-4487-01A	1
TCGA-05-4403-01A	1
TCGA-91-6848-01A	1
TCGA-55-6986-01A	1
TCGA-50-5932-01A	1
TCGA-55-6971-01A	1
TCGA-55-7728-01A	1
TCGA-44-2661-11A	1
TCGA-44-6779-01A	1
TCGA-MP-A4TK-01A	1
TCGA-69-8255-01A	1
TCGA-05-4432-01A	1
TCGA-55-A492-01A	1
TCGA-50-5931-01A	1
TCGA-44-2668-11A	1
TCGA-50-6597-01A	1
TCGA-MP-A5C7-01A	1
TCGA-38-4628-01A	1
TCGA-55-8096-01A	1
TCGA-73-4666-01A	1
TCGA-53-7813-01A	1
TCGA-91-6836-01A	1
TCGA-78-7540-01A	1
TCGA-44-7662-01A	1
TCGA-55-7283-01A	1
TCGA-44-3917-01A	1
TCGA-62-8398-01A	1
TCGA-78-7536-01A	1
TCGA-97-8172-01A	1
TCGA-50-6592-01A	1
TCGA-73-4677-01A	1
TCGA-55-A491-01A	1
TCGA-44-6147-01B	1
TCGA-55-6972-11A	1
TCGA-05-4389-01A	1
TCGA-44-6774-01A	1
TCGA-95-7562-01A	1
TCGA-86-7714-01A	1
TCGA-55-6969-11A	1
TCGA-86-8359-01A	1
TCGA-05-4398-01A	1
TCGA-86-8075-01A	1
TCGA-44-3396-01A	1
TCGA-MP-A4T4-01A	2
TCGA-97-A4M6-01A	2
TCGA-44-7670-01A	2
TCGA-44-6777-11A	2
TCGA-44-3396-11A	2
TCGA-67-3770-01A	2
TCGA-05-4249-01A	2
TCGA-67-4679-01B	2
TCGA-49-6742-11A	2
TCGA-64-5778-01A	2
TCGA-67-6217-01A	2
TCGA-67-3774-01A	2
TCGA-50-5942-01A	2
TCGA-86-8280-01A	2
TCGA-83-5908-01A	2
TCGA-49-AAQV-01A	2
TCGA-91-8497-01A	2
TCGA-75-6214-01A	2
TCGA-64-1680-01A	2
TCGA-55-8091-01A	2
TCGA-44-5645-11A	2
TCGA-55-6982-01A	2
TCGA-62-A46Y-01A	2
TCGA-75-7025-01A	2
TCGA-50-5051-01A	2
TCGA-64-1681-01A	2
TCGA-50-5049-01A	2
TCGA-50-8460-01A	2
TCGA-50-5068-01A	2
TCGA-97-A4M1-01A	2
TCGA-50-5946-02A	2
TCGA-44-6775-01C	2
TCGA-49-AARE-01A	2
TCGA-69-7980-01A	2
TCGA-95-7947-01A	2
TCGA-55-8616-01A	2
TCGA-49-AAR4-01A	2
TCGA-50-5045-01A	2
TCGA-97-A4M2-01A	2
TCGA-49-4512-01A	2
TCGA-49-AAR0-01A	2
TCGA-49-6745-11A	2
TCGA-05-4430-01A	2
TCGA-91-A4BD-01A	2
TCGA-50-6593-01A	2
TCGA-49-4505-01A	2
TCGA-55-6983-01A	2
TCGA-73-7499-01A	2
TCGA-55-7573-01A	2
TCGA-44-2655-11A	2
TCGA-MP-A4TJ-01A	2
TCGA-69-7765-01A	2
TCGA-38-7271-01A	2
TCGA-62-8399-01A	2
TCGA-69-8254-01A	2
TCGA-49-AARN-01A	2
TCGA-49-6745-01A	2
TCGA-38-4625-11A	2
TCGA-99-8028-01A	2
TCGA-91-6835-01A	2
TCGA-53-7626-01A	2
TCGA-91-6847-11A	2
TCGA-91-6835-11A	2
TCGA-55-6983-11A	2
TCGA-55-8621-01A	2
TCGA-69-A59K-01A	2
TCGA-05-4434-01A	2
TCGA-50-5930-01A	2
TCGA-55-6984-11A	2
TCGA-62-A46R-01A	2
TCGA-95-8039-01A	2
TCGA-55-6986-11A	2
TCGA-MN-A4N5-01A	2
TCGA-44-3398-11B	2
TCGA-93-8067-01A	2
TCGA-44-6147-01A	2
TCGA-35-3615-01A	2
TCGA-97-7553-01A	2
TCGA-78-7147-01A	2
TCGA-55-8207-01A	2
TCGA-67-3772-01A	2
TCGA-97-A4M5-01A	2
TCGA-J2-A4AE-01A	2
TCGA-93-7347-01A	2
TCGA-44-2661-01A	2
TCGA-49-AARO-01A	2
TCGA-86-8056-01A	2
TCGA-44-6776-11A	2
TCGA-78-7143-01A	2
TCGA-97-A4M0-01A	2
TCGA-NJ-A55A-01A	2
TCGA-97-7941-01A	2
TCGA-55-6978-01A	2
TCGA-69-7763-01A	2
TCGA-91-6828-11A	2
TCGA-50-8459-01A	2
TCGA-99-7458-01A	2
TCGA-97-A4M7-01A	2
TCGA-50-5935-11A	2
TCGA-55-6985-01A	2
TCGA-55-6984-01A	2
TCGA-44-6148-01A	2
TCGA-50-5933-11A	2
TCGA-50-5055-01A	2
TCGA-78-7167-01A	2
TCGA-69-7974-01A	2
TCGA-55-8510-01A	2
TCGA-05-4402-01A	2
TCGA-49-AARR-01A	2
TCGA-50-8457-01A	2
TCGA-44-7671-01A	2
TCGA-55-8511-01A	2
TCGA-L9-A743-01A	2
TCGA-55-7725-01A	2
TCGA-55-A57B-01A	2
TCGA-97-8552-01A	2
TCGA-62-A470-01A	2
TCGA-L9-A7SV-01A	2
TCGA-55-7907-01A	2
TCGA-97-7552-01A	2
TCGA-L9-A443-01A	2
TCGA-93-7348-01A	2
TCGA-05-5423-01A	2
TCGA-86-8073-01A	2
TCGA-75-5146-01A	2
TCGA-44-2657-01A	2
TCGA-49-4514-01A	2
TCGA-55-6968-11A	2
TCGA-69-8453-01A	2
TCGA-73-4662-01A	2
TCGA-50-6595-11A	2
TCGA-95-A4VN-01A	2
TCGA-38-A44F-01A	2
TCGA-55-8204-01A	2
TCGA-55-7281-01A	2
TCGA-05-4405-01A	2
TCGA-55-6982-11A	2
TCGA-55-8614-01A	2
TCGA-44-6148-11A	2
TCGA-MP-A4TD-01A	2
TCGA-91-6849-11A	2
TCGA-55-8513-01A	2
TCGA-50-6673-01A	2
TCGA-91-6829-11A	2
TCGA-55-8512-01A	2
TCGA-44-7659-01A	2
TCGA-55-6981-11A	2
TCGA-55-6978-11A	2
TCGA-86-A4P7-01A	2
TCGA-44-2657-11A	2
TCGA-78-7162-01A	2
TCGA-97-A4LX-01A	2
TCGA-55-6980-11A	2
TCGA-93-A4JO-01A	2
TCGA-55-A48X-01A	2
TCGA-49-4488-01A	2
TCGA-55-8090-01A	2
TCGA-55-8208-01A	2
TCGA-69-7979-01A	2
TCGA-MP-A4SY-01A	2
TCGA-44-A47G-01A	2
TCGA-99-8025-01A	2
TCGA-86-8076-01A	2
TCGA-50-5944-01A	2

## Sheet: Supplementary table 6
Table SVI. TCGA LUAD count.
TCGA-38-7271-01A-11R-2039-07	TCGA-55-7914-01A-11R-2170-07	TCGA-95-7043-01A-11R-1949-07	TCGA-73-4658-01A-01R-1755-07	TCGA-86-8076-01A-31R-2241-07	TCGA-55-7726-01A-11R-2170-07	TCGA-44-6147-01A-11R-A278-07	TCGA-50-5932-01A-11R-1755-07	TCGA-44-2661-01A-01R-1107-07	TCGA-86-7954-01A-11R-2187-07	TCGA-64-5775-01A-01R-1628-07	TCGA-73-4662-01A-01R-1206-07	TCGA-44-7671-01A-11R-2066-07	TCGA-78-8660-01A-11R-2403-07	TCGA-62-A46P-01A-11R-A24H-07	TCGA-86-7955-01A-11R-2187-07	TCGA-55-6978-11A-01R-1949-07	TCGA-50-6592-01A-11R-1755-07	TCGA-38-4625-01A-01R-1206-07	TCGA-80-5611-01A-01R-1628-07	TCGA-86-8054-01A-11R-2241-07	TCGA-55-6986-01A-11R-1949-07	TCGA-L9-A5IP-01A-21R-A39D-07	TCGA-69-7764-01A-11R-2170-07	TCGA-49-6744-01A-11R-1858-07	TCGA-75-5125-01A-01R-1755-07	TCGA-38-4626-11A-01R-1758-07	TCGA-69-7763-01A-11R-2170-07	TCGA-86-8279-01A-11R-2287-07	TCGA-93-8067-01A-11R-2287-07	TCGA-97-8179-01A-11R-2287-07	TCGA-55-A48Y-01A-11R-A24H-07	TCGA-55-6986-11A-01R-1949-07	TCGA-86-8055-01A-11R-2241-07	TCGA-91-6835-11A-01R-1858-07	TCGA-55-6982-11A-01R-1949-07	TCGA-55-A4DF-01A-11R-A24H-07	TCGA-44-6774-01A-21R-1858-07	TCGA-50-5066-01A-01R-1628-07	TCGA-05-5423-01A-01R-1628-07	TCGA-67-3774-01A-01R-0946-07	TCGA-97-A4M2-01A-12R-A24X-07	TCGA-95-7567-01A-11R-2066-07	TCGA-49-AAR0-01A-21R-A39D-07	TCGA-05-5428-01A-01R-1628-07	TCGA-44-2656-01A-02R-0946-07	TCGA-53-7813-01A-11R-2170-07	TCGA-O1-A52J-01A-11R-A262-07	TCGA-35-4122-01A-01R-1107-07	TCGA-44-2656-01B-06R-A277-07
1536	2936	1475	3659	3269	1188	2178	4545	4558	9079	3577	6839	3794	1486	1766	4279	1500	3334	10120	3254	8681	3399	1113	857	2786	3214	2370	1624	8462	3434	6146	4118	6760	8641	2510	950	3943	1403	3580	4477	2698	1459	2546	1443	2096	6039	1952	2730	10798	1196
0	0	0	188	0	0	4	0	0	3	13	150	7	2	0	0	3	1	0	1	0	6	0	0	17	18	1	0	3	0	5	0	3	3	4	1	0	1	1	12	0	0	108	1	0	1	0	0	36	4
765	1447	1275	981	1540	1564	1430	1557	2089	3519	1206	2512	1695	1226	1661	3773	869	2504	6714	1781	3598	967	1180	1000	1443	1552	2770	1588	3576	2676	2211	1117	2070	2135	881	706	3162	662	2836	2813	738	1031	3384	1716	3780	2198	956	1583	3551	359
510	827	373	456	1171	269	1139	1185	1025	1630	263	2889	1007	465	475	757	367	657	1006	725	1030	407	982	863	680	414	621	498	1871	1269	1158	632	1110	1175	506	475	726	256	533	1014	611	861	1409	669	698	1767	573	804	542	621
172	241	172	158	318	219	434	322	315	1097	172	1865	295	441	95	685	89	621	2088	556	1492	107	642	346	242	316	166	114	828	765	632	389	202	549	96	87	603	158	433	525	203	187	908	302	594	689	195	356	1115	373
911	343	81	1645	1915	321	606	424	1760	1745	758	2257	408	1223	368	236	2130	1294	1873	1467	544	423	361	236	1458	1211	17257	743	788	801	720	472	4876	1499	1062	2201	1578	372	533	742	862	6849	807	2315	254	2550	175	2852	1698	328
4290	1389	954	4056	18517	4710	8546	2953	4856	27633	1391	4009	5792	1298	1010	403	2690	9473	4534	4676	2580	3405	14898	3842	5864	2961	2921	3092	2065	5969	10946	2911	7059	16778	13072	3277	3114	9676	2068	3946	21814	2589	3619	1785	1950	17170	1631	6073	2522	5536
1097	1393	1704	1468	3143	1260	793	2283	2761	4204	1619	3692	5020	2789	1817	3811	1036	4554	11159	2955	1652	1276	2909	957	1481	4278	3076	1185	2159	4556	2303	2155	2671	3475	1369	1187	4174	1100	2694	1216	1443	1661	2292	2159	1733	4461	972	2359	3619	562
807	226	10114	815	2378	1419	1918	1365	1370	5052	235	764	21357	24951	359	4703	975	37272	11145	7189	1674	177	3268	480	1352	22723	2724	967	2004	28767	9124	3231	3160	5468	1115	727	8421	1064	3758	336	2013	1885	344	5368	13386	16527	458	539	3067	6053
1043	3758	986	1818	1993	1120	1864	3226	1596	6721	2034	5619	2284	2174	699	2257	638	2664	2225	1524	4862	2725	1531	2016	1392	1507	1651	2268	7135	4690	3725	2157	1869	2207	818	776	1571	1145	994	978	1249	1300	5605	1060	1192	4012	1180	1788	2081	1007
318	368	239	405	1035	290	523	442	567	1202	559	1192	1217	238	159	874	769	449	1012	607	759	188	791	401	625	579	1262	399	864	1346	624	311	2691	1200	1247	481	607	291	271	306	799	553	850	727	175	721	143	344	420	166
1302	3331	863	1184	3737	959	2677	1776	3097	4014	1815	6873	4942	1448	604	2115	2140	1252	4029	541	1810	3881	2022	932	2140	1626	2747	1447	3455	6691	2527	1287	5953	4446	2499	2279	2535	1601	744	1715	2294	2565	3196	1539	722	4187	883	2518	755	1235
1077	2178	1454	1783	2191	1453	1266	2414	1174	4294	2597	5603	2316	2038	901	5124	1099	2238	6628	2761	4453	1800	1632	1055	2044	1455	1752	1205	3107	3447	3911	1765	3490	3445	1448	1113	2726	709	818	1630	1426	1930	3105	2749	319	3785	990	5822	1212	566
1270	2229	1119	1037	2200	317	4569	11314	4043	2797	222	10998	5116	865	1328	2780	2304	1001	1092	1674	3803	1151	346	1887	2100	761	6935	2198	4948	1429	3935	1047	5992	2774	1886	2102	3018	1070	1479	3571	2149	2366	6634	1206	1621	3316	1129	2796	2126	1159
694	994	628	1486	2168	1131	802	1923	1465	2095	1518	1065	2278	1232	1286	1332	1071	1588	2079	436	2840	770	2178	448	1165	997	2000	2069	4243	3442	3619	2558	5084	4115	1153	1444	377	2222	434	331	3130	1493	3590	1316	353	1871	171	443	753	105
704	277	16	538	1110	15	600	159	528	2265	0	149	956	482	113	103	1014	30	898	94	726	312	27	250	3526	182	1769	733	1792	419	693	97	1631	160	619	814	375	68	196	1041	845	1463	28	1445	40	660	660	672	340	273
1397	3010	2009	3415	2869	2465	4678	3442	2064	6881	3137	7295	3378	2059	513	7707	1420	4067	6257	2865	7533	1535	3148	2256	2452	8095	2100	2456	3578	3941	4503	2686	3634	6027	1689	1867	3944	1949	2352	1733	1541	2186	3764	3111	1670	5583	1921	2649	5933	3154
58	83	70	126	110	16	304	421	43	160	193	638	232	74	2	577	161	175	334	67	243	52	200	91	85	123	265	93	150	199	95	82	214	312	131	164	66	57	70	101	65	74	263	162	145	247	6	137	117	14
110	275	247	182	281	140	425	321	241	557	170	633	253	239	153	358	223	249	646	227	477	149	423	198	183	320	276	191	478	324	506	210	500	389	218	215	364	106	217	177	110	361	358	501	191	355	232	313	206	545
98	306	301	157	324	194	371	393	467	864	479	456	399	574	235	1125	192	424	718	140	946	108	402	373	224	579	212	277	723	526	710	218	793	425	382	348	623	117	193	214	194	710	637	344	217	706	338	285	238	377
1	14	10	33	8	64	20	10	4	13	19	11	22	52	0	66	8	105	242	5	3	8	48	9	4	69	0	26	26	1646	58	15	19	31	4	2	15	3	17	3	11	37	11	26	4	41	3	10	101	55
248	369	349	406	544	46	330	416	679	1125	337	1202	399	441	432	728	311	227	924	562	321	246	270	93	335	348	763	246	1290	237	178	299	811	547	337	236	402	153	392	686	272	508	961	861	494	439	80	571	1199	23
4948	7266	1372	4956	10220	2091	4954	5331	7712	21959	4353	21765	7221	4569	2354	11097	4463	10738	19582	6010	7458	3266	4958	3455	7787	7847	9076	4103	7259	10395	6296	5008	9344	6597	4549	5591	11516	3297	4310	7119	4817	5031	9244	4231	2919	16828	3482	4064	9400	1740
5539	2258	2544	10519	10006	3929	2787	4813	10533	14972	24804	9161	12841	9993	3455	18390	5069	4307	13494	7631	9209	3058	9870	3088	11112	7118	12136	8630	15765	24011	4004	6469	10420	17620	5753	4646	4766	9266	4844	3012	6824	6719	8385	11269	4746	10627	3135	2253	15658	1298
0	0	0	0	0	0	0	0	0	0	0	0	0	0	0	0	0	0	0	0	0	0	0	0	0	0	0	0	0	0	0	0	0	0	0	0	0	0	0	0	0	0	0	0	0	0	0	0	0	0
536	365	58	1856	1395	240	771	571	612	942	125	1499	539	514	412	2988	494	456	1057	244	1963	584	1011	345	659	321	1041	369	3490	1147	384	158	2293	2296	383	213	550	375	219	630	432	503	1072	357	296	1876	248	197	1469	251
235	23	6	54	1011	50	68	339	374	1989	24	305	13392	106	4303	17	28	134	40	55	937	1095	1383	35	1505	1819	118	807	423	7834	2466	4869	40	163	126	38	7585	47	12	93	1992	803	324	17176	24	104	721	6740	918	7
25	5	11	2	18	9	25	2	39	64	2	18	10	14	0	47	6	74	129	37	319	4	3	4	4	6	5	2	9	1	8	6	35	10	28	5	21	102	116	6	7	4	2	17	3	12	18	12	55	52
30	71	172	77	37	76	179	34	58	88	33	61	207	15	1	3	3	83	187	28	34	26	312	55	59	27	11	127	166	53	262	60	20	416	43	9	13	158	52	15	34	10	77	209	39	46	7	135	18	50
34	25	16	36	32	44	93	10	47	28	68	48	3	24	4	22	37	30	35	20	22	12	33	9	37	26	128	9	29	18	18	14	39	35	32	39	30	4	32	23	14	69	40	44	6	61	9	54	39	99
7098	11713	8672	11651	11522	9530	4836	15301	12642	45147	10273	38016	23215	12291	5514	13181	5894	14977	25053	19568	8786	10103	13113	11200	12786	15797	14728	7034	21845	43590	15408	10134	16864	31213	6752	7832	7621	5908	3394	4854	9784	10143	24664	10180	2771	23218	5419	12218	6951	1650
794	1123	1309	977	1301	948	676	921	2878	3153	858	3285	1263	1185	774	2158	796	1459	3701	1175	2328	709	611	1191	1233	1300	2630	847	2017	2210	1281	1289	2080	1842	740	809	1370	641	1600	1948	912	1283	1880	1126	1591	2556	509	861	3789	219
2418	1064	198	3200	5710	1245	486	602	6454	8405	965	4695	11542	2906	7498	460	1273	2918	3386	1845	3257	4707	841	741	2966	1589	1735	2346	1467	6632	2834	7156	2256	3287	2341	1343	7511	2711	2864	1798	4951	2504	3308	13350	1150	3823	2607	9850	11243	178
2528	2011	1955	3459	4219	3404	2103	5991	5778	7785	7785	7027	3772	2875	907	4566	2207	8083	13814	2270	5171	1432	2917	2535	3460	4109	7791	2177	3169	6517	2852	2680	5191	6334	2073	2733	4947	1511	1896	2709	2522	3420	5604	1591	2657	6517	929	2710	6317	867
95	184	29	86	198	57	247	35	121	42	46	1067	131	23	39	1757	198	100	41	213	259	21	10	45	50	21	239	80	58	107	24	27	909	119	647	192	75	222	26	58	114	79	11	29	4	84	76	36	33	40
198	363	396	571	147	232	65	71	181	311	114	546	378	201	185	57	123	363	1802	223	135	105	457	118	269	99	463	209	68	192	289	132	2203	497	327	412	255	245	68	30	42	135	141	228	28	201	29	24	88	65
751	2046	1228	939	2606	701	2133	3343	1586	3614	120	5481	4314	1029	4519	4525	688	1183	2505	1896	4361	1359	3977	1576	2231	1384	1083	1893	4438	2948	4656	2384	1555	3022	735	599	1326	498	947	990	978	1675	4392	3257	938	2415	1662	1730	1211	777
571	1944	456	925	1727	119	587	2166	1259	843	159	1720	3687	2586	1217	7433	169	1219	2847	1601	2295	890	1182	1506	422	581	356	1529	2990	2062	5043	2341	737	2615	528	354	1723	495	273	782	1836	1102	3781	2991	570	2399	976	1531	962	90
692	1415	1275	629	1531	1114	1419	1798	1190	2666	1300	3459	1467	1026	708	2239	864	2278	2164	1315	2463	684	1116	1329	1461	890	1333	1187	2253	4244	1466	1086	2927	2479	1179	1053	2199	687	535	535	1038	1286	1859	1780	963	1688	900	1479	664	868
1173	2880	1201	1336	2015	666	2337	1949	3012	4802	448	6262	1590	946	625	433	1060	1483	1706	1471	515	510	1074	1841	3004	2462	2885	1161	2452	2674	1654	1526	2627	3148	1249	1387	1609	650	952	1375	1261	2002	3511	1081	1148	3955	869	4597	1563	1093
5160	10760	4068	6289	9336	3162	11896	7900	8009	9772	3314	26967	5494	8470	2115	4154	8738	6587	11981	3994	4341	2474	6276	7712	9064	6214	12176	6019	6697	9377	5982	3214	24086	8768	7780	10290	6619	2135	3483	5422	6449	10788	14282	6485	3150	16500	2375	15415	8253	14086
5402	27920	290	12496	5600	1739	6282	8010	82631	14456	11511	6774	2758	3973	1206	2289	5966	20474	10012	18407	4303	31404	7051	965	11752	1871	11826	4316	6040	14263	4181	2167	17252	17508	3909	4343	1165	1032	4718	3634	4136	4738	5769	2842	565	3968	6084	15086	9514	2290
232	578	372	297	705	259	561	649	665	1125	426	1557	512	442	462	1289	252	752	1186	450	1215	350	425	592	552	403	674	349	648	599	763	528	686	744	360	277	696	283	680	512	437	585	888	558	1185	916	406	565	609	367
1021	1945	777	1133	4344	1281	2237	1903	3016	3469	2998	5574	2101	2305	3249	4568	1979	1907	3265	1234	4598	1639	2554	2998	1795	2114	3036	2266	4952	3777	3067	2315	6514	3828	2672	2643	3901	1117	1028	1054	1936	5919	1979	3616	1470	3942	1550	2142	751	2997
39	38	5	40	103	18	78	60	52	46	23	225	85	27	218	107	69	39	97	38	1999	39	197	95	113	42	132	87	99	55	97	82	189	39	75	57	243	61	40	31	85	123	53	1034	30	56	987	18	161	209
655	156	236	1841	10633	151	2213	9578	503	1095	1173	1472	40207	145	8352	31692	2484	1882	524	176	34107	749	19897	10347	4113	299	5980	6193	285	12225	1152	9657	8732	565	2265	755	846	2609	275	636	2605	5234	184	6855	585	524	9363	133	630	361
2216	2774	1756	3737	3716	1725	1955	4357	3671	8123	2334	6136	4686	2938	1324	7207	1728	3713	13753	3846	5809	1913	3234	2361	3184	4702	5471	3030	7172	3872	5467	2477	4547	4429	2402	1740	2840	1750	3995	5755	1743	3156	6302	6241	10920	5692	1247	3771	13900	160
156	365	84	116	323	81	334	186	331	316	25	721	118	310	127	270	170	239	120	142	277	215	137	122	191	187	228	101	736	171	276	149	558	453	421	260	296	163	42	128	240	382	257	337	78	395	151	574	67	171
2731	5117	6305	4459	5790	3062	2621	6973	5277	11505	3666	12917	8483	7211	3066	10902	1945	6054	22431	8282	7799	4309	4295	2753	4875	4639	5455	3551	9505	9773	7906	4943	5189	8725	2781	1930	4822	2397	2768	3857	4893	4751	10168	5022	4731	7665	2072	6853	7401	438
5901	7130	5852	5709	9948	2317	7917	7423	6569	34876	5864	13048	12508	6624	3710	7433	6310	9593	7738	8097	8676	16980	4400	4224	9294	5799	12091	15586	18109	15353	22568	6926	20232	23861	5508	8242	10724	5154	2001	1760	11489	12201	25807	7999	2820	10793	4763	18647	3811	1443
3124	8918	1708	4075	12348	2861	4772	4244	10232	14728	5625	30705	9189	5078	3516	9738	2736	6946	27104	7908	10097	5477	4063	5684	7968	7234	6477	7171	12348	15343	11896	5998	6578	7463	3564	2980	14930	2641	5471	11984	7627	7718	10598	7201	10030	17234	7032	9876	13577	3106
734	807	68	693	3197	154	792	628	1099	4603	121	1174	6755	1205	105	308	1318	1497	1949	471	160	230	925	2651	1636	772	1280	1105	51	739	3006	1583	3514	646	2023	1189	1351	521	826	925	1096	3569	1542	904	109	2253	1045	112	1045	959
1720	2463	4012	3632	5309	4268	1438	4205	1479	6325	12077	5637	5104	5540	225	12910	1150	9465	17798	1365	14855	2116	5839	2840	3084	5731	2306	2020	5015	15018	8146	5433	4183	6339	1626	1361	4708	1464	3002	2477	1274	2894	13300	3827	3737	5166	949	1811	8672	444
1869	2641	1570	2384	5243	2449	3569	2970	3070	9364	8756	7484	6612	2667	2456	9055	1786	4293	8370	4380	9010	2758	3947	2609	4446	4221	3343	3596	8210	12517	3787	5393	5416	6584	2793	1887	8872	2196	1755	1510	3173	3334	6152	5052	1931	6125	3259	3430	3789	1039
1056	2483	1146	1316	3384	2053	2479	2151	2884	5965	2728	6999	2614	2322	4591	6946	1971	2310	5067	1581	5467	1818	2744	3821	1908	4414	2328	2479	6937	5347	3387	2586	6616	3451	3475	2770	4709	1278	681	639	2148	8036	3228	5327	750	4258	5028	2697	554	2242
206	264	228	298	1233	74	366	430	449	1150	519	1033	1403	434	525	290	326	265	348	242	926	420	199	258	597	248	1019	354	535	490	649	314	1040	764	518	380	802	284	410	182	559	1216	241	1265	143	713	178	470	241	110
694	503	214	794	1159	1594	1386	623	890	3382	4449	1432	1015	743	115	519	619	2043	3398	451	1830	345	2414	521	1004	1435	1009	584	1193	1887	739	975	1287	3212	782	796	1479	778	846	602	1155	604	2540	349	704	1545	198	457	1379	471
596	1128	804	883	1351	953	1860	1595	1015	1977	994	2688	1195	845	284	2114	738	1449	3477	935	2365	625	1915	802	882	1604	1490	917	1400	1544	1755	942	1945	1802	748	742	1219	485	1037	964	488	983	1798	809	1001	2493	392	982	1719	1058
353	78	852	218	82	13	31	58	177	59	40	167	147	61	33	16	260	28	126	2	103	36	127	20	84	16	511	110	78	70	40	33	756	54	366	335	68	109	23	19	70	186	31	101	19	38	6	112	105	4
47	95	470	94	258	58	78	196	280	862	101	669	75	470	243	339	183	147	388	523	1386	62	294	365	117	344	179	118	637	438	447	33	564	343	245	150	2794	90	105	88	263	753	245	1090	58	397	157	354	145	53
949	716	2166	2507	2724	1048	1521	2605	3445	4043	2009	3525	2737	2211	1770	5485	1122	2027	6250	2256	2908	1236	3612	1330	1936	2142	2922	1403	4041	4245	3233	2686	2999	2809	1322	908	2523	768	2825	5849	1596	1690	2556	2861	4516	3593	1030	3365	4685	343
7045	326	258	4374	1925	217	8642	4986	793	751	2905	3453	3893	615	195	6559	4678	488	2468	784	27090	1562	1268	3197	6625	1074	6495	2378	2019	2706	2736	681	19216	1073	1455	4606	327	727	595	678	3754	2874	258	1054	268	6970	660	729	751	3018
5	8	2	4	113	5	30	3	22	7	14	24	92	4	3	3	3	0	59	0	1	7	6	0	14	11	27	1	2	4	11	1	2	12	2	2	5	8	15	12	1	9	2	21	35	4	0	116	22	6
65	58	3	41	2691	16	1730	23	592	335	3	310	1055	87	46	157	2456	93	86	534	75	26	49	35	84	111	3536	172	71	1213	92	21	11092	196	7234	1388	95	32	134	171	1582	990	315	578	58	149	8	30	57	11
2	1	0	1	5	1	8	8	1	17	0	7	22	5	0	4	5	1	5	5	35	3	0	0	5	1	36	0	5	2	7	1	261	8	4	4	0	1	1	7	4	13	0	11	0	2	0	5	8	33
77	686	109	43	57	2	934	3	17	3008	0	623	127	215	209	2	99	19	6	1007	12	169	834	3	93	41	87	8	48	399	12	19	539	123	221	96	22	90	6	234	16	21	726	58	4	29	9	451	1	4
681	1394	2283	1395	1696	922	2083	1324	727	4383	921	4569	2508	1708	398	3628	519	2632	4114	1960	3832	1121	1637	1173	1582	1070	1328	1013	2175	1903	2891	1974	1421	2378	586	482	1909	973	1072	1167	581	1090	1979	1508	902	3416	626	2051	3478	790
874	2877	913	828	1596	578	1060	2003	1937	2809	867	2016	2860	860	629	1446	1257	967	3436	832	2281	930	853	2062	1595	837	3232	893	2812	1392	2723	1020	2952	1385	1412	1157	1740	669	1939	2167	1224	1619	1616	1834	871	2872	875	2669	1905	776
1578	2722	1929	2003	3156	1992	3011	4087	2957	7302	3947	7510	3655	2129	1167	5224	1502	3906	8091	3880	5444	1622	2700	1910	3231	3106	3060	1989	3836	4743	2436	2976	3797	5882	1718	1714	2909	1720	1918	1319	2025	1969	5154	1495	1657	4162	1348	1986	3999	2190
2	0	1	5	2	1	31	1	2	9	2	2	4	0	0	0	15	6	7	0	1	2	4	6	17	3	175	5	5	10	6	0	17	2	6	5	2	0	1	0	4	2	1	3	2	2	0	3	2	3
3	5	28	16	5	2	53	24	15	42	26	142	25	46	0	5	8	179	17	8	24	9	24	6	8	12	5	7	3	27	6	4	23	86	0	23	5	7	10	59	5	13	33	10	15	27	0	22	126	17
526	633	461	1013	1330	463	587	1164	1361	2076	1053	3002	1060	427	675	2088	501	1278	5032	1153	1427	791	1256	410	1091	1074	2023	789	1792	1593	812	2092	1389	1239	497	521	1214	427	811	1976	1196	840	1275	976	922	2592	459	1504	1952	283
752	795	1196	981	1769	402	728	3159	918	2599	3080	4219	3182	2013	1303	2991	887	2388	5898	1667	3392	952	1300	1165	1093	1767	1685	1209	2184	2210	4651	603	2559	2193	1034	877	2017	667	881	748	1984	1669	2090	1907	579	2805	387	1163	1190	274
382	433	698	1183	771	1253	498	1683	862	2432	6	2199	618	745	1977	3620	336	6924	2900	2136	159	469	4976	750	1279	306	1111	389	3212	2885	561	883	1359	1995	519	278	250	132	447	1005	773	720	1294	696	693	1625	149	1280	1482	66
4380	6481	4298	3870	8706	2124	7634	6615	2895	11209	7459	13144	10746	5676	2880	8190	3955	5001	9517	5507	8005	4082	9162	4906	4848	4184	6499	22474	10003	17677	4815	8206	10365	11125	4027	4048	5503	2501	582	1723	3477	6625	14575	6276	905	7535	892	6151	1792	742
2832	3975	1500	5194	2816	2158	2234	2947	4319	3441	1975	5414	3528	1968	989	4559	2189	4432	23311	3769	3856	761	1896	1458	3418	5257	5627	1696	2987	3656	3906	2200	5258	8376	1699	2361	2818	1686	2108	2296	1228	2454	5212	1477	2143	5892	412	1479	4392	2381
9525	12223	6341	11665	20114	8714	6152	15208	24434	18449	16630	26676	12804	8942	6273	22355	4532	10088	50664	16678	33659	11461	11453	12525	14561	9877	20844	8544	14225	19159	14504	9294	10206	16642	5922	4103	16177	3480	17101	21564	10409	9386	12167	11546	16387	19387	6345	19024	38959	1308
934	293	201	1534	1008	588	523	162	1726	1836	1714	1481	450	975	192	847	351	1162	5020	2258	444	337	396	176	956	1291	1542	381	723	990	286	411	796	1203	635	556	1763	470	1383	1412	460	640	1447	730	1573	1700	181	615	3622	489
2	0	9	0	8	72	0	0	0	22	2	1	0	0	1	10	4	286	6	60	393	0	5	0	9	0	1	2	2	32	0	6	0	92	0	0	8	67	2	1	0	8	1	0	8	0	1	0	22	0
777	1034	1902	1558	1547	511	568	1443	1351	2420	1218	1992	2309	1530	805	3040	568	735	3710	1734	2196	765	2650	1022	993	2000	2127	627	2791	2109	2459	952	1645	1572	726	552	1003	662	2393	1642	707	1284	2459	4553	2789	2170	548	1268	2935	58
457	1454	922	618	1433	680	1047	2076	548	2002	1431	2859	1819	1434	506	1936	446	1637	2837	675	3160	1289	1123	621	732	1125	712	849	1661	946	1928	689	1391	1637	706	659	1774	864	362	353	865	907	1077	846	310	1917	672	673	421	600
113	19	31	102	141	57	105	71	196	139	20	135	94	23	10	2	13	31	45	6	12	43	47	17	70	23	104	37	17	52	37	21	47	135	387	30	26	23	20	38	33	55	17	47	2	71	10	120	60	11
189	71	461	181	305	103	940	109	121	473	66	343	274	185	602	41	263	578	205	723	331	66	300	72	479	117	183	264	598	163	351	195	756	1063	190	456	113	343	213	69	373	171	167	214	35	334	50	343	334	414
794	1392	2027	914	1412	854	2358	2131	1089	6638	1080	3984	2029	1666	539	4576	721	1804	3882	2522	5717	818	1295	2062	1382	1034	1119	859	2994	3446	3328	1637	1655	2783	867	711	1738	899	423	691	912	1229	4317	1198	708	2072	781	1375	620	637
809	1016	834	1001	1851	874	1120	1847	1047	6669	1304	3168	1700	864	795	1516	665	2571	3265	1139	3862	799	1856	755	1425	2539	1259	813	2316	2760	1416	1380	1863	2083	898	638	2208	625	812	913	1320	1016	2555	928	742	2980	1074	929	1011	772
321	579	554	263	1135	39	484	1376	879	643	27	897	1329	418	116	244	252	721	375	128	200	322	19	1178	866	306	623	236	205	944	1003	1101	393	498	238	273	289	128	84	1110	474	635	614	257	230	1619	232	4902	447	257
49	62	135	85	162	136	301	93	188	376	95	285	215	220	60	615	80	108	569	357	287	61	153	217	136	1168	133	58	491	306	409	105	329	508	140	72	426	64	170	271	146	152	303	409	169	310	80	352	247	74
1214	2722	1213	1248	2423	1270	1630	2763	2321	3796	1715	3699	2743	1842	1642	3339	1063	1927	4304	1193	4289	1156	3186	2122	2019	1271	2608	1599	7413	3436	3001	3107	2366	3847	1275	952	2874	1143	1750	2917	1955	2072	3671	2487	1928	4459	1537	2784	3150	316
776	1321	771	647	1950	197	864	819	1192	3593	792	2922	1215	1622	5769	2837	945	1342	4035	943	4244	909	2622	832	1049	784	1295	895	4103	2719	1690	676	3440	1668	1452	876	2559	560	258	423	794	3202	3345	5101	292	1504	668	2197	458	142
475	968	368	1454	1484	647	651	837	942	2269	1415	1768	1406	819	1019	2485	802	1276	2514	934	1534	569	1231	527	1319	1135	3721	1000	1876	3461	2023	861	2358	1873	874	760	2707	892	415	577	579	2517	2193	1087	390	2200	743	1004	661	299
250	268	231	633	387	573	343	125	741	1223	161	408	383	142	242	502	290	538	912	231	167	102	141	122	671	822	579	401	1150	416	322	840	706	1494	354	256	194	1293	574	744	414	428	328	337	309	544	141	251	747	73
813	106	4178	472	1140	360	698	265	748	4189	293	1134	426	171	454	136	546	679	192	1048	4146	341	358	140	1411	344	1163	262	994	285	1577	295	2145	408	576	564	1706	425	1144	3006	846	913	533	1198	811	601	210	168	539	292
880	1419	505	991	2231	582	960	774	3151	3852	2088	2824	1393	787	498	2596	971	1363	3386	1126	1284	1110	978	836	1630	1022	2383	977	2739	1913	1209	1694	2859	1662	1215	1217	2580	693	1386	1505	1267	2616	1540	1562	975	2582	1155	1554	1826	931
4161	4385	3006	4218	7347	3140	6011	10033	3255	13018	6662	10612	7643	4614	1922	10071	3680	5666	6401	5249	5576	3002	2726	6488	6615	9604	4386	5628	11172	12983	7307	4302	10631	12061	4212	4573	5851	3079	565	2102	4299	6161	7821	4427	631	9537	1814	8030	1056	3667
211	1001	25	63	687	64	981	748	1257	2246	342	1767	290	268	451	111	902	163	1976	301	1118	441	91	1537	337	639	748	350	1905	438	628	154	3283	1051	1712	869	1587	289	125	447	757	1900	442	994	120	536	511	1545	121	145
22	6	2	12	18	5	22	7	40	52	11	39	5	20	3	7	22	37	647	7	20	5	4	5	23	184	74	8	12	15	4	9	19	36	16	12	96	17	11	19	31	49	10	19	3	38	10	26	124	2
6	359	25	8	311	1	66	103	45	587	1	668	16	24	7	30	18	7	8	7	51	60	14	6	59	17	55	5	392	956	51	2	57	20	6	13	15	5	100	51	12	74	22	69	52	124	15	91	62	176
396	1478	400	392	1090	311	907	638	702	1216	886	1493	1180	480	424	1666	397	1022	2003	450	2878	526	593	764	561	782	676	520	1142	728	636	834	1332	760	487	467	962	272	566	370	684	675	977	416	339	873	588	454	765	776
325	408	744	341	1385	254	746	76	952	1040	1064	930	767	554	423	1108	1288	971	1532	1153	2160	201	366	254	663	516	1631	282	1507	908	334	183	4665	1354	2855	590	1487	256	1562	394	922	642	1018	952	344	621	351	1296	920	72
389	854	433	767	1048	1669	779	520	779	1527	406	1731	1366	1029	140	720	472	745	1364	457	491	362	891	447	571	374	860	452	1305	900	1337	523	1576	1239	1011	538	470	278	389	565	283	682	632	522	478	780	245	811	609	193
156	150	26	42	170	38	141	187	50	448	62	185	296	74	14	76	9	42	47	62	727	24	17	41	42	24	25	78	63	82	5105	13	37	114	40	20	71	50	19	61	277	70	47	77	20	66	93	116	19	39
2991	4483	3307	2577	4951	2972	4800	8058	2426	7597	3000	9437	5638	2000	946	8114	2942	2188	4260	2673	5337	1846	3432	4214	4198	3440	4258	2478	4961	4645	4637	2235	8124	7286	3400	3650	4210	2195	1027	1790	2336	4101	5666	2455	1144	7141	2342	4620	1297	5432
3989	4356	3511	4576	5571	2555	1450	10749	4550	7752	2537	18151	8652	3892	1924	6197	4908	4448	10580	2676	6314	2627	7420	4465	4234	8433	15740	2820	5222	9069	7597	3126	12547	5679	5303	3143	5056	2674	2349	4404	4113	7373	8933	8911	3743	10962	1306	5770	7206	359
172	24	7	23	92	11	129	23	104	50	4	102	18	9	134	12	9	15	19	6	6	114	21	7	40	6	28	74	28	95	18	20	51	54	29	18	31	13	3	7	48	23	11	39	4	21	4	14	2	10
1334	3198	1284	2017	4858	1852	3840	3517	3900	7683	2617	9145	5365	3534	1926	4853	1954	6867	10710	2455	4615	3309	3230	1961	2588	2856	3666	2510	4123	4899	3389	2779	4601	5661	2285	2011	2727	1869	1296	2380	3277	2296	4939	1875	1499	5602	1378	3214	1887	3411
330	2277	667	459	1367	530	1190	1427	2050	2602	698	2289	1116	587	1252	1554	519	848	1670	942	3279	1118	1718	1192	879	562	935	606	2147	1760	1094	1303	1431	839	693	728	2989	425	1022	900	891	1230	1580	1101	650	1717	1826	869	1281	2107
2425	3061	678	1461	3981	1616	7719	3860	2099	4693	1272	4309	4646	1440	729	2059	1906	3699	3997	1068	3430	1400	1792	1288	2576	1451	2023	2366	2278	2785	2439	2062	4441	4058	2779	2753	3131	1933	594	593	1900	2219	2693	1249	441	3457	731	2104	494	5227
1530	3058	1274	1701	2718	1527	2784	2628	3779	2538	2041	3750	3537	1210	829	1319	1936	1699	2807	1287	1958	1238	1066	1129	2049	1333	4129	1973	2732	1912	1632	1406	5398	2783	1843	2182	2489	990	2655	1633	2148	1914	2255	1089	2747	2315	609	738	2355	1353
3888	1309	463	1504	4032	213	894	458	2902	6498	462	4299	561	2383	336	697	2352	2011	1580	1548	493	714	627	1053	2437	1966	6754	992	694	1310	1491	615	3821	1825	1277	3017	2547	495	353	897	1336	6537	2259	2373	95	6400	632	2309	1439	830
501	856	534	618	912	263	242	1445	1275	1309	355	4475	1301	292	327	372	556	1010	1940	407	1205	732	552	1043	1562	746	1173	1051	1985	1541	818	575	2067	1323	805	582	946	511	470	576	862	888	1564	696	317	1573	234	1505	630	103
5851	13846	13794	22328	21417	21197	8134	54361	14185	13329	34396	79232	41389	24518	10422	4614	14180	6864	53515	11103	4206	26728	20451	15851	20723	40395	14430	50977	16050	43960	17251	32085	37899	62956	16456	16180	6176	5966	10276	7416	21907	15280	84708	16493	7264	57389	4765	31669	50035	5895
1100	1472	768	1239	1734	782	3806	1723	2642	5101	1897	4068	1568	582	673	1810	906	1685	2842	1049	1228	1354	1477	797	2025	1175	2099	1094	2362	1835	1075	1176	4120	1671	1738	1787	1667	931	569	1051	1662	1373	1576	901	530	3033	1174	2525	638	2151
6621	7147	5823	9696	9007	11359	8864	15677	15364	25070	13723	23321	13430	5590	5822	13006	6047	11512	34930	21559	11261	5818	5974	8078	13512	13087	20034	5204	11966	12986	14066	9035	14132	44727	5532	6667	13434	5210	8742	9136	7197	7853	8969	5629	9553	25996	4105	12305	22298	7813
13	46	50	29	44	10	19	8	100	75	14	90	26	23	26	593	53	98	130	238	64	10	21	18	32	137	187	4	147	42	10	3	105	63	26	28	144	96	71	32	23	81	27	55	89	70	3	68	28	12
6	39	15	5	26	14	41	24	20	10	9	39	220	7	27	77	45	4	20	30	1513	12	13	15	20	39	120	13	98	44	55	2	116	64	20	11	35	142	22	28	37	45	10	52	27	251	6	244	8	180
2642	2044	2374	4961	3710	2911	4655	9127	12117	5560	2565	15648	10537	5500	1074	8343	2295	6004	15848	1913	5132	4391	6011	7322	6098	3129	6104	3360	23020	8707	7654	4045	5365	14581	3268	2729	2692	2961	3694	15033	6951	3374	8473	2833	6194	15429	1780	14202	5147	1349
489	645	613	409	1386	133	409	483	1451	1464	531	772	754	962	680	580	503	963	1652	1677	520	645	1010	316	537	453	1713	1422	1100	1373	533	561	1528	1401	477	614	702	260	1002	815	787	1550	823	1995	742	855	695	835	949	62
769	1888	162	713	3465	890	441	3589	5570	10907	19	641	43998	213	45681	86	197	151	101	162	5928	2951	700	7857	262	238	917	40259	1130	43997	2295	109642	690	5507	3202	199	1585	5360	1854	68	55067	852	9760	8912	280	129	26801	249	463	13
281	461	611	404	1063	123	343	977	801	2839	213	819	2004	1096	850	513	410	723	813	471	485	610	1245	2040	631	1032	402	1302	908	1587	975	219	1369	1035	814	637	1262	225	57	255	795	1448	459	1151	94	1142	189	1078	222	140
2081	4911	3515	1401	4084	961	1768	8620	9848	9256	4996	10205	6392	953	3246	2608	2264	1363	11740	4198	5388	2884	474	3041	4381	705	3980	3477	7828	8533	2281	3572	7290	6400	5038	2347	2631	1894	2249	1849	3542	2437	12047	2348	389	1488	2538	4226	3896	136
22	1	86	2	13	157	50	188	12	588	0	72	11	118	2	1588	7	43	1907	193	55	1	54	105	180	17	11	18	562	20	14	96	22	427	36	5	291	46	54	78	127	106	732	1363	162	601	123	196	513	73
0	0	0	0	0	0	4	0	0	0	0	1	0	0	0	0	0	0	0	1	0	0	1	0	0	0	1	0	0	0	0	0	0	0	0	0	0	0	0	0	0	0	0	0	0	0	0	2	7	0
1059	1050	551	329	1109	152	784	273	1024	1633	173	1572	425	1390	217	948	885	2538	836	934	445	337	609	273	735	514	1780	516	912	744	457	201	1890	835	777	608	1167	271	234	360	633	1007	496	754	92	1038	111	1361	569	181
9	36	38	12	12	0	14	9	23	29	2	2	140	13	12	1	17	3	32	0	2293	105	0	26	16	0	72	17	10	10	7	1	206	16	21	21	12	2	3	10	139	124	1	337	0	13	8	42	0	21
2	0	1	0	1	0	0	0	3	0	0	1	1	0	0	1	0	0	17	0	0	0	0	0	0	2	0	0	0	0	5	0	1	0	0	0	2	0	0	0	0	0	0	0	0	0	0	0	0	0
980	1637	334	2957	2273	1473	946	1426	1407	4675	3907	4065	1854	1036	2581	4928	369	5597	13219	1001	9354	2271	1607	873	1407	781	567	956	10028	6123	835	1956	1407	4912	582	385	5428	1132	568	447	1770	1054	3194	1762	227	1634	595	301	1809	55
7771	13627	11931	12558	12254	7479	10877	17385	13455	34047	14472	30477	22138	16686	3883	24117	6800	19305	49952	10858	21777	10921	7871	15777	11406	11167	11281	8509	17984	20178	18107	8573	18282	29106	11640	8728	11524	6706	3682	4416	9643	8943	21212	8586	3529	18716	6172	20096	8193	4216
0	0	11	0	2	0	4	1	0	0	0	0	0	0	0	0	2	0	0	0	1	0	3	0	0	0	2	0	0	8	1	0	1	1	2	2	0	21	2	1	1	0	0	14	1	0	3	1	93	0
740	1018	1808	1072	1883	738	1890	2051	1493	2788	1572	3033	1547	1631	955	2553	779	1704	3130	1408	2071	950	1539	1467	1315	1842	1426	1110	3316	3065	2262	1344	2230	2273	948	819	1775	532	535	1727	1431	1423	1648	1971	401	2108	877	2992	922	428
2457	8765	377	5066	3457	1051	1458	889	2520	5248	1050	14434	1783	3219	524	208	5418	737	1014	99	618	1237	884	613	6239	2687	8117	2002	2593	1478	6566	685	21147	14451	3315	6499	3277	2045	574	3485	1675	2672	7132	3966	1137	13750	245	9064	4754	639
856	2002	6118	2959	3377	378	1108	4015	3024	6445	1487	7062	6181	3245	3515	5833	817	3281	6804	3065	2515	2735	2373	3215	2902	2209	3966	1795	4478	7835	4388	2168	3571	5785	1892	1139	1481	1342	1096	1828	3186	5659	2998	2355	949	9508	1033	5319	2300	492
26	21	10	20	47	37	46	4	70	26	17	32	18	9	4	12	7	120	47	4	191	10	6	4	115	12	38	19	329	25	19	8	27	57	49	24	17	7	23	52	14	30	12	18	9	21	1	74	2	5
893	1310	221	4342	1965	3655	2037	6489	2909	4441	10607	14511	3693	3470	1903	9555	1649	4402	23032	2385	628	1513	7331	912	3845	6172	9216	2086	16138	4746	4769	1853	3613	15803	1130	1322	1480	1913	5060	7587	4784	1405	6874	2754	2672	9895	333	9606	10037	339
15	2	154	2	37	11	55	0	1	244	0	0	7	1	0	0	0	202	1	5	819	0	0	8	11	1	2	2	14	9	3	1	1	6	2	0	262	0	0	8	29	12	2	174	0	1	15	0	6	0
556	1844	1578	613	986	1667	2162	1832	739	1539	238	2494	1335	919	541	881	530	906	1020	323	1434	1511	1810	829	418	1008	496	746	1376	2953	2080	1221	1666	1281	920	843	3129	383	110	408	428	1185	2061	558	389	3000	1065	2533	455	2095
1781	2587	1465	4489	3883	4150	1411	3335	3624	4290	6206	5352	4670	2396	2231	4694	2765	4342	9305	4644	5653	1990	3790	1670	3459	4952	5375	1932	5906	5011	4242	5312	8766	6116	1609	3543	4387	1776	2896	2618	1629	2695	5917	3602	2736	7433	1809	2802	7719	1724
794	2600	3816	3369	2592	2774	2139	3912	1304	6881	1392	5574	4426	2908	1007	9902	1233	4781	6029	2821	2361	2688	7319	2695	2014	4306	1816	3121	5910	5482	4721	2140	3078	3957	1931	1141	2410	571	1083	1249	1145	1865	4589	3679	1666	4945	938	1336	2776	1126
1320	3662	806	1001	3326	951	4822	1086	1905	5490	813	2817	3100	1138	959	2407	1344	1692	2464	1330	4421	1327	875	1328	2075	1531	1572	1628	2357	1756	2383	1351	4967	2859	1139	1398	3957	831	398	899	853	1795	2061	1347	1443	4496	781	1619	863	3450
1438	6112	100	1015	1513	853	889	5005	4405	805	3028	6838	1164	897	224	135	2535	939	1225	582	3379	6433	136	865	2799	2059	3049	2115	9461	1323	4385	1043	5105	5897	1577	1679	495	766	2146	2185	1021	2424	1295	755	1092	5111	501	3166	1002	3489
601	1345	854	688	1376	825	1425	772	1092	2396	1007	2380	1659	891	787	2357	597	1224	4621	1028	2620	822	1359	1050	1078	1330	1015	941	1729	1174	2074	869	1690	1669	842	788	1623	482	595	907	701	1687	1546	1326	1527	2478	926	1136	1304	1261
1445	3347	6625	2313	9555	474	3956	24531	2318	4258	546	22668	24803	2910	6584	19149	11212	3590	1759	5388	854	1234	17322	9841	5144	2228	18523	6946	7267	10764	20562	10729	38049	2877	13597	8005	1664	1279	1181	7584	5996	16345	11741	6497	923	18595	848	9338	2407	1487
409	1040	147	426	1050	284	430	1406	395	1415	13	1441	1050	639	338	2338	436	2523	1824	528	67	502	7047	532	633	548	404	581	1468	1901	1144	750	1299	987	531	428	297	130	59	310	540	600	1256	828	214	835	209	1037	229	124
834	1710	1624	1770	1353	1240	1605	1313	3250	2887	1306	5019	1622	1295	584	5101	745	1451	2632	2115	3617	1054	1120	605	1168	1835	2280	647	2989	1345	1625	975	1545	3938	603	830	2079	1888	2081	1921	859	1179	2381	1267	2654	3847	1384	976	2212	2198
3	10	16	41	5	41	4	0	52	84	61	5	6	21	3	3	6	174	127	12	14	3	17	4	27	51	10	7	38	136	7	21	15	31	5	5	35	30	123	92	2	7	39	40	22	19	21	0	112	1
981	2408	1634	876	1606	1235	2563	1642	853	3311	1271	3882	1965	1615	451	3239	1104	2951	2121	764	2692	877	1514	1603	1036	1225	1454	1269	1969	5425	1415	976	3148	2742	1152	983	1878	853	334	705	986	1456	2948	1600	835	2165	725	1553	899	1229
4	16	0	15	90	0	57	4	9	216	0	5	12	6	8	11	39	470	147	10	4564	4	7	2	191	2	35	11	5	2977	7	19	104	44	38	5	18	3	0	0	50	56	1	19	3	11	2	35	361	6
388	1256	399	769	1449	669	1007	887	761	1535	448	3128	2252	745	1107	1570	203	982	3718	1521	2789	628	1782	1073	749	4577	508	326	3041	1332	3335	1292	547	3382	368	206	960	504	590	1739	258	632	1525	1886	751	2135	880	630	643	422
277	624	879	470	463	563	518	544	499	1008	1068	1009	636	545	145	1285	114	984	2918	908	2251	362	703	208	400	1062	500	311	565	680	723	548	322	735	241	148	1401	272	1278	410	229	306	1323	878	1167	1456	336	267	2579	422
91	57	87	339	115	79	46	86	54	187	381	323	184	218	95	114	124	138	607	22	49	41	150	69	143	151	205	169	288	169	204	156	610	172	114	152	37	175	34	19	89	183	438	172	35	159	13	46	107	11
72	403	411	256	380	299	457	194	227	888	213	649	147	343	175	816	257	597	971	694	768	173	628	225	225	703	884	129	883	478	706	338	956	460	241	274	1358	137	695	267	141	509	438	1011	381	628	231	312	490	875
2	0	0	0	0	0	2	0	0	1	0	0	0	0	0	0	0	0	0	1	0	0	0	0	0	0	0	0	0	0	0	0	0	0	0	1	0	0	0	0	0	0	0	0	0	2	0	0	0	1
490	599	880	468	1152	291	356	1191	976	1034	487	1571	1293	709	421	1412	333	788	1386	458	1755	759	873	477	776	406	689	670	1015	1170	1536	547	920	637	485	358	648	392	378	420	731	680	1203	551	403	1140	259	379	735	234
476	1761	688	1232	1492	788	897	1934	669	3810	2226	3243	3165	1220	1031	1866	639	3122	4407	1227	2883	727	1911	1796	1296	2888	928	1159	2524	2866	2511	1032	1975	2339	615	549	1366	574	313	482	927	1257	3658	1622	344	2776	775	1607	1009	377
1919	2311	2973	1913	3537	1586	1885	3862	2405	4262	2888	6814	7415	3380	2544	4293	2146	4706	5134	2323	5187	2244	4576	5822	2634	2978	4548	2588	4719	6172	4794	2664	5942	5053	2485	1659	1975	1009	1763	1409	3344	2899	6573	3585	1197	4103	1876	2660	6035	295
1678	3412	2596	2448	3448	2263	5130	6059	4576	4276	2546	9216	4692	1644	2395	6789	2006	3069	4126	3307	4477	2207	3517	3519	3156	2419	4510	1605	7500	4686	7214	2824	4773	5718	2008	2168	2644	1303	1607	3609	1861	2935	4844	2212	2521	9664	1100	5188	2583	4292
475	1297	494	487	1253	49	582	943	784	1541	58	2204	1558	384	608	1996	2069	1691	2185	369	3039	1961	98	739	1144	146	1993	742	906	1581	298	704	4213	944	2317	2150	1564	486	166	798	1343	1333	972	1031	87	450	234	1131	178	186
1773	2022	2482	1757	4167	790	2073	4490	1859	5285	2968	5584	5906	2604	2515	4204	1624	4032	8227	1761	3720	3518	3657	1443	3130	2531	2800	2095	3671	6800	4501	2192	3811	3324	2287	1559	3188	1543	1107	1390	2489	2907	4876	3054	883	4251	847	2807	2319	465
1212	101	256	4002	885	89	594	6237	209	1532	103	22861	2603	678	1240	15	469	384	282	555	7042	2154	368	620	1086	617	1077	350	3623	1378	3083	1009	1042	1361	685	301	5336	2159	509	2295	625	775	6926	1646	159	212	1057	9415	750	99
2247	3194	2816	3255	4081	572	4195	12894	7156	20105	885	20771	5496	1234	2611	5150	1863	1959	3442	3979	2525	5127	2842	4128	7688	2535	4837	2839	4596	2919	5306	4515	7898	5119	3784	2699	3278	1367	402	4563	9697	2808	3937	3041	1023	11151	3019	29400	1646	1357
506	366	247	743	820	200	554	971	2271	938	502	2697	1241	210	387	1562	360	496	3082	444	372	763	699	469	818	437	1520	448	1339	1048	684	635	2010	724	1067	609	262	384	453	1522	860	648	945	746	855	1597	284	2664	1244	149
1	2	1	1	1	20	2	0	3	1	327	9	3	6	0	0	5	0	1	1	6	0	0	0	5	3	2	2	10	0	13	2	13	23	5	7	0	2	6	2	9	6	20	2	3	4	2	1	2	11
2043	1770	3520	2951	3751	4753	2433	5544	2817	6485	12162	5593	3756	2519	1569	12423	3627	6264	9734	1613	8380	1272	4244	2466	3595	4638	9539	3026	4330	10172	4446	3576	7751	5515	2511	3226	5793	1544	1619	1517	2330	3402	7474	2508	1758	6953	2404	2314	4229	1591
1	31	9	8	37	7	21	18	20	55	10	30	9	17	19	14	19	24	27	14	31	6	18	5	5	26	22	13	35	16	38	6	45	14	21	10	22	7	11	35	21	27	11	60	26	48	17	51	19	81
3	6	6	0	4	3	8	2	10	14	3	6	2	4	0	5	2	0	2	3	1	1	5	3	2	5	5	0	7	9	4	7	18	5	20	3	7	0	1	4	3	5	1	9	10	6	7	4	15	12
37	314	610	7	720	62	334	111	65	621	0	250	18	3	4	4	31	4079	47	209	12	6	2	81	42	914	928	44	2	4	60	9	158	1129	51	92	54	174	60	1009	21	169	951	49	8	148	83	51	119	5
944	1646	1412	1464	2233	555	848	3714	1251	3468	2941	2458	2126	1151	1105	2905	845	2538	4473	1329	3188	1311	2535	2246	1640	1780	1761	2063	2719	4048	1675	1163	2384	2633	942	940	1078	1004	465	545	1897	1389	2729	2607	711	2102	758	1041	812	215
1026	7503	10816	138	2825	56	4499	370	372	3141	1	117	1296	25	4	593	1950	1129	11	1481	2169	44	217	1427	620	51	1331	147	894	508	568	20	7612	1940	984	244	2122	405	49	743	219	1623	862	805	6	166	2133	14	3720	49
1311	2256	1209	1781	2659	447	750	1348	1648	2798	2517	4414	2623	3017	1801	4275	1248	3203	11586	3329	2307	1631	3301	741	1738	1452	3115	1301	4170	3842	1879	1237	3501	2901	1386	1258	1542	868	854	973	925	2136	6681	4607	1113	2482	334	1335	1539	54
181	155	15	83	142	17	142	94	350	362	46	303	50	138	45	15	230	194	114	18	145	638	59	27	112	124	984	75	78	55	160	26	243	179	78	228	97	123	181	246	71	405	130	183	106	426	103	150	145	33
3256	3545	2972	3699	7858	3472	6289	8746	4107	10447	5178	14173	9730	4490	2696	5601	4861	8075	9292	2567	9780	3595	4891	3433	5709	5279	7970	4725	7105	7139	7531	4020	13028	7471	5387	5531	6675	3557	2422	2811	6489	5552	4685	3963	1633	9627	1899	3660	3710	4640
16	33	37	197	45	19	40	73	12	101	44	71	91	84	132	20	182	774	50	11	24	28	63	71	40	31	27	118	17	100	225	114	351	77	36	100	2629	81	8	8	87	94	100	101	16	46	7	18	50	7
11	16	2	42	2610	6	3239	5	243	384	1	140	2174	30	8	4	2844	8	17	0	24	30	32	19	20	20	2054	210	2	612	39	7	14561	13	5515	1347	3	6	0	41	378	789	6	217	4	40	3	15	5	16
2818	8242	6318	2944	6932	4092	7088	11178	5170	12737	7212	19751	16429	6152	2056	13101	3601	7620	10579	3291	22870	6569	6715	1954	3451	6687	5850	5072	7203	7919	11315	6478	8872	9910	5199	4215	5512	3500	1351	2613	6191	6532	9209	3907	2588	8949	2863	11932	2576	2503
142	226	340	1	14	0	1068	0	186	251	0	100	8	30	62	0	15	1	65	0	45	0	26	177	16	3	49	23	4	23	2	0	185	9	2	14	9	131	0	10	11	25	0	21	1	3	120	79	1	3
2823	4037	423	1871	3036	2462	3084	1226	2278	2518	354	4170	2107	1044	161	323	2371	1543	2338	695	1283	888	571	568	2422	1246	3528	1756	1903	907	862	2236	6649	4408	6220	2685	940	2479	608	713	1458	2874	1415	1343	226	4022	240	1154	871	1216
610	1543	3489	450	985	96	950	1483	1585	635	133	1151	945	859	769	1506	480	720	1342	1400	534	559	811	1221	904	870	1442	1118	2059	922	2127	1542	1303	1066	531	464	527	257	751	1088	640	1296	2422	2499	2228	1179	146	851	1046	17
277	89	26	235	398	31	161	52	354	259	185	413	89	286	200	60	362	168	156	433	72	105	974	60	290	206	1275	88	222	207	90	82	863	414	240	371	225	61	201	159	129	1163	221	365	45	567	12	436	785	17
14	73	110	8	28	38	43	15	53	284	0	17	14	7	18	27	6	3679	6	2	32	24	92	23	63	2	19	36	91	19	12	173	24	217	15	9	65	9	6	61	79	28	47	30	7	11	13	49	18	3
946	191	30	79	453	12	225	32	571	214	35	567	74	211	98	50	38	118	346	58	31	82	86	76	228	84	93	63	45	84	73	120	129	164	107	50	127	51	666	174	142	235	276	496	35	298	50	23	270	8
10	4	17	14	46	2	10	8	15	278	50	38	201	1151	7	0	2	24	15	1	3809	6	5	6	21	71	9	7	16	20	9	8	10	28	4	6	4	216	11	4	9	17	13	50	2	28	27	172	44	6
203	422	113	347	491	314	707	430	345	1008	268	898	766	346	306	939	281	439	898	254	732	339	198	431	285	292	547	305	1043	353	314	244	817	769	310	275	395	204	299	383	260	312	426	560	486	812	140	544	482	674
7	5	1	10	12	0	0	17	11	6	0	9	1	4	4	4	120	6	2	2	30	1	2	0	8	2	26	1	3	14	5	39	13	2378	2	15	5	1	4	2	11	4	2	4	2	5	18	0	2	0
1	1	3	2	0	44	3	0	4	5	21	0	3	0	1	154	0	34	15	2	0	1	6	1	1	0	0	0	2	2	0	0	4	1	2	1	1	0	20	0	0	0	0	2	0	1	0	3	0	8
569	839	874	1059	1641	216	574	1390	971	2161	1753	1717	1377	2130	1550	1420	342	535	5415	946	727	1102	2300	548	842	1987	993	865	3171	1934	1431	844	1056	1305	492	377	659	502	531	923	924	1261	1414	2116	653	1518	141	1204	1401	36
628	854	533	1706	1497	746	1693	3094	1460	4644	1103	5314	3144	2069	1843	2745	887	1390	1981	1507	1334	713	4872	1404	1845	1816	1524	1594	6346	3412	4874	1211	3014	3467	1108	1120	1919	877	277	1605	1464	2081	2806	1851	461	3329	641	4836	559	220
580	1451	1297	1513	1997	553	1437	1759	2441	2936	1252	3366	2077	1552	2866	2193	955	1077	5684	1052	2697	729	1785	1514	768	974	1490	940	4900	3017	3374	1097	2955	1418	1326	1102	3266	545	621	1077	1117	3475	2323	5232	617	2543	1591	3633	760	1898
1089	1257	48	208	2284	33	2240	1204	2130	1236	4	3273	11998	1049	3076	210	5241	75	1919	17	5373	2021	65	3979	2813	227	8146	3194	6461	814	4245	158	14108	416	3441	5273	303	547	94	1389	10329	6231	440	6270	31	1384	1010	7573	168	298
95	161	50	204	1975	151	1559	672	331	421	16	1503	710	360	646	5241	1585	263	1052	383	924	134	524	61	211	859	1678	280	2149	526	889	131	6923	1075	2229	707	119	202	71	416	794	954	672	1074	176	716	167	477	55	63
776	955	1125	1325	1341	368	1031	1830	1311	2201	2222	2701	1781	1898	990	3969	653	881	3687	1570	1068	795	1726	782	1178	1749	1636	754	3021	2598	2480	907	2045	2023	799	693	941	528	477	1442	1011	1418	2442	3011	659	2136	179	2560	1147	47
872	1163	910	1380	2474	330	1121	1730	1484	3267	823	3243	4540	2166	2241	2025	1495	873	4585	1484	1052	665	2005	1516	2007	2315	2687	1545	4585	4273	3919	1243	4365	3330	1923	1244	1250	660	325	1759	1631	3695	2873	4259	318	2051	329	3561	1020	78
233	930	639	306	894	586	617	960	574	1071	596	1606	753	656	544	1881	421	536	1030	403	801	529	1522	446	575	1015	535	666	2158	1419	1745	594	1651	1075	595	631	1020	327	102	266	467	1431	783	1151	167	1362	372	1222	151	385
996	1971	535	1514	1655	1387	1027	5326	1814	4925	985	5336	4032	1633	1168	1960	1155	3162	2014	1443	2334	1327	3209	2684	1901	1724	1865	2383	10493	4587	3122	1693	3195	3361	1290	1203	1415	1327	480	607	2026	1893	4660	2139	649	2034	813	1963	1111	180
553	15	100	1675	244	270	64	45	106	494	35	746	107	27	20	32	80	45	558	35	86	136	1320	27	49	40	860	60	41	223	58	185	211	238	293	67	181	270	53	456	138	128	41	55	7	57	20	72	171	15
634	837	695	888	1424	764	1006	1214	947	3325	1263	2695	2147	1200	570	3334	697	1703	2867	1006	2540	805	1635	983	1627	1729	1164	1117	2986	3664	1445	1172	1795	2247	838	723	1917	561	359	516	1141	1281	2791	1226	473	2693	599	1306	1069	397
648	209	61	1577	532	350	1184	204	2172	2505	66	1539	783	94	63	73	1032	123	488	4285	309	119	104	409	596	135	1123	557	516	258	528	169	3160	1425	1205	678	423	356	455	574	236	557	565	283	257	497	88	223	577	124
1261	2326	575	836	3071	432	2843	2301	2057	2230	182	5401	1787	796	1589	1887	1711	730	6100	1132	4137	1312	997	1975	1171	1579	2063	1429	7427	1682	2567	652	5495	1794	1342	1579	1281	719	678	1794	1074	3033	4277	2497	1514	2356	1174	653	972	550
63	113	56	40	95	26	60	55	68	379	56	244	79	75	72	43	27	29	111	47	89	59	32	27	38	49	34	47	90	74	105	65	111	1691	34	24	49	16	30	44	50	41	77	38	22	105	71	133	24	24
103	131	123	160	203	343	139	80	165	719	112	399	255	442	63	1183	33	342	823	388	796	83	241	162	205	760	71	91	635	1557	281	198	88	510	33	50	2298	166	59	73	119	149	383	618	88	479	175	132	125	60
3220	3435	3722	3628	6695	4082	3191	3800	11304	14252	3415	14085	8685	6049	5071	7880	3160	7302	16868	7670	5558	4673	6297	2612	5367	10462	10389	3580	8874	12606	6020	3881	8069	7211	3640	2741	7070	2389	10552	8507	4836	4216	8712	6755	7527	11347	3548	8933	15544	838
50	22	9	60	72	33	11	77	50	33	16	36	153	40	16	26	13	75	27	8	35	15	22	14	50	25	53	104	83	27	23	69	42	76	122	23	169	81	43	15	109	31	31	489	7	32	17	39	73	8
1009	1106	896	831	1502	1203	1849	1467	650	3865	4155	1747	1846	1257	414	2201	731	941	1698	1023	3852	692	2688	1169	1221	737	983	1391	3538	3276	1471	1739	1758	1462	805	786	1622	668	197	270	698	1400	3657	1404	321	1402	801	619	456	620
493	2867	814	934	1131	1308	2254	1553	627	1584	1151	3251	2884	349	299	1209	1305	677	852	459	588	350	929	1880	1028	442	1344	1004	1476	1173	1324	1065	3277	1778	1232	1717	811	617	109	374	910	1457	1250	527	149	1932	373	1741	161	1705
55	34	13	68	121	51	22	33	85	61	1	99	47	36	24	11	13	86	236	16	75	28	60	17	85	50	50	53	41	40	62	99	36	81	23	18	39	41	9	41	27	55	58	71	16	109	2	79	60	37
14	30	45	21	37	7	44	37	41	130	45	73	41	93	101	96	35	32	44	30	69	33	100	42	20	36	57	26	88	81	70	18	169	74	48	46	50	11	19	5	43	95	81	175	11	49	21	62	13	39
2209	1475	2460	2388	6286	1047	2327	2133	3870	7809	1995	8714	7888	5070	2548	16370	1715	4737	5135	5826	3797	2360	5292	1955	3414	4273	4188	2996	4546	10605	4692	2959	4512	5314	1923	1835	2291	1456	1450	1754	2783	5406	7179	5313	2191	7493	974	3203	2945	748
0	0	1	0	3	0	0	5	1	0	0	1	0	0	0	0	1	0	0	0	0	5	0	58	0	0	0	8	0	9	0	0	64	27	6	26	2	0	0	0	0	1	0	0	0	0	0	0	0	1
0	0	6	0	9	0	0	1	0	13	0	50	0	165	0	0	0	1	1	2	568	0	0	70	4	0	0	0	85	0	28	0	0	212	0	0	2	1	0	101	0	16	13	153	0	0	1	0	0	0
20	51	7	38	657	6	463	32	301	266	7	223	359	279	74	20	1159	16	74	13	35	71	43	63	65	202	657	95	77	347	146	28	7374	53	3555	737	60	26	10	42	345	1557	52	329	17	79	16	219	12	58
1712	39716	523	2833	1792	1489	6379	1922	2788	5035	3081	4452	2700	1219	423	2732	1755	868	2647	1747	2066	1210	1134	863	2981	2570	2133	2255	5401	1304	3370	1402	3911	13611	2280	2237	1786	1824	1035	2337	1067	1681	3118	1530	1735	5672	384	2712	1366	1415
280	548	450	102	340	135	493	135	228	279	366	1042	115	89	108	861	154	679	261	183	1120	183	49	67	341	496	145	285	342	312	79	118	641	771	264	238	626	224	126	69	142	169	193	133	99	173	93	104	87	272
3928	4554	4019	6078	6154	7596	4822	9788	5633	11408	6743	9601	11273	2665	2130	10668	3985	7868	18298	3273	9795	4022	7225	3968	5079	6848	7575	3124	8469	6194	6720	5316	11017	8561	4772	3703	4741	2806	5131	5834	3975	4331	8007	3059	5138	9937	2100	3378	14632	1758
3863	5318	5774	3856	7845	2575	4367	14152	4457	23744	758	11047	16254	10245	6545	28082	4105	7645	10187	3960	6453	6125	3790	8018	6164	6915	5716	6660	15669	23225	8091	4972	13527	11198	5996	3530	7240	3918	1304	3073	6416	6371	14082	7417	2581	13148	5677	4879	3988	656
2788	10479	7694	3866	5416	4331	8734	8391	4982	6339	5509	13128	7600	5011	2367	9061	4383	7201	8134	8284	4676	3672	3542	11901	8563	8277	6491	2736	8701	7595	6356	3264	11414	10523	4019	4920	5471	3362	1910	3859	5950	5376	5527	2311	1648	13340	2393	10671	2346	6632
197	464	469	523	409	358	342	68	480	356	2011	500	462	894	1732	5144	72	2217	642	497	751	114	308	156	219	405	57	174	1713	5038	417	3206	152	996	80	94	589	104	63	67	116	590	541	1524	496	1566	65	142	47	431
1455	1513	815	1154	1707	271	1633	827	999	1868	871	1354	1355	1625	484	843	916	488	1309	573	3295	605	345	810	1265	391	1762	1608	2192	990	2377	1993	2449	570	1148	1071	2622	420	97	436	1166	3059	904	787	165	635	840	2033	131	709
166	51	122	103	210	348	241	668	192	844	40	586	328	149	68	5756	131	2712	131	329	355	77	341	248	519	778	266	134	1055	494	799	184	539	1254	289	126	832	109	237	190	140	343	2002	427	799	497	71	131	1335	84
463	520	307	672	1082	253	285	351	1068	598	1179	1144	759	497	1043	675	303	673	1806	739	948	584	466	372	498	775	1025	515	1013	1215	810	643	811	666	358	324	723	251	1289	985	603	644	1049	811	1784	921	468	353	1505	134
301	404	225	502	690	72	464	470	681	801	489	1723	432	428	373	820	301	329	2472	487	807	414	292	258	370	174	1473	222	990	401	702	388	819	442	331	314	367	151	161	396	247	616	1079	874	249	799	81	519	339	42
4529	5370	5990	11294	11629	2711	2662	19719	9982	12722	5256	17347	45712	14220	10687	13997	3378	17455	48416	9143	4359	5475	94340	2967	12070	17087	15584	4802	15035	46722	26855	28714	8737	10903	5287	3387	15707	2165	12234	11902	7372	11969	24656	42595	47057	21208	4665	4409	22598	4448
528	1063	569	595	1176	674	1069	622	1144	2491	948	1907	1678	688	486	1231	981	1840	1825	1120	3354	425	619	574	890	513	1839	857	1201	1638	523	903	2472	1673	1260	1083	1336	599	739	591	995	660	1835	691	1107	894	443	458	1202	276
3	4	7	7	5	1	9	2	8	4	2	6	0	0	0	2	24	6	7	0	3	4	2	2	8	3	27	2	1	3	3	1	20	0	1	10	2	0	4	3	5	2	0	3	1	8	3	1	2	12
4831	9802	2182	2705	7661	2079	5007	3311	6358	6748	930	5727	4244	1588	556	1376	6146	1663	7199	1227	1418	3220	987	3866	4246	1333	7244	3959	11304	5271	5790	1374	16992	7768	8563	7744	1906	3703	464	2708	2883	5837	2399	3050	226	3851	755	8202	908	775
3214	8681	280	4594	8449	3259	3867	1606	6040	12853	26463	2928	8129	4527	1829	9785	2366	8119	2597	643	3763	4006	7229	2249	2417	1433	6205	6286	11912	14904	6055	2713	5742	4944	2873	3236	1510	2012	646	3007	3055	6376	2606	2366	563	3695	12307	2320	1269	1040
166	71	12	58	408	36	70	45	146	320	13	268	235	372	37	73	241	204	226	94	57	48	303	56	102	175	351	49	123	142	113	90	336	92	71	117	198	60	63	44	105	415	149	203	18	474	24	81	80	66
3500	3800	280	1626	7063	2122	603	932	9769	5890	1767	4611	710	4223	1255	949	2564	2839	2112	2689	915	1321	7909	1285	4877	2949	3546	1694	5606	5265	3091	7472	7332	8782	2589	4401	2846	2260	2281	1665	3830	3645	9691	5006	2539	6374	1056	1124	5062	250
808	1264	733	1052	2098	433	2705	1433	794	3464	1164	3502	2357	1761	793	5375	1848	1295	1327	685	2280	953	3006	805	1258	1290	1579	1575	6017	3943	2492	1525	7272	3924	2722	2481	2055	2676	158	493	1439	3502	1225	3542	191	1902	201	3695	145	280
131	37	1698	305	243	45	100	13	497	241	13	344	97	211	381	288	86	967	7022	977	1134	39	970	63	200	1468	218	104	173	415	29	236	310	710	229	93	78	111	53	21	555	210	36	1843	37	1517	20	100	399	82
2143	2862	3990	2532	5022	1092	1762	4252	3376	9313	3291	9167	8258	4402	3808	9166	2132	4533	10869	4414	8279	2200	3204	2120	2966	4534	6574	3253	6262	7433	6027	2767	6159	7009	3056	2179	4512	1956	1402	1152	2928	4752	6173	4920	855	4633	1574	3076	2365	337
3161	10041	286	4264	9430	364	1202	8288	4270	1745	1119	20177	37652	3483	8271	6507	4172	805	2139	2245	3001	2060	975	22744	3765	2183	6139	12855	6611	3448	17501	2546	6946	1521	2924	4265	1033	677	255	2485	10940	7880	4165	6436	297	3310	1609	9010	903	599
979	2091	810	1016	2825	806	2396	2626	1280	3669	997	5793	2758	1116	698	4064	1733	2171	2241	1074	3496	1178	2217	1515	1485	1764	3435	1596	2196	1940	2121	1283	3579	2460	1406	1611	1723	787	337	595	1136	2217	2739	1052	612	2919	740	1938	519	1772
6764	11844	7980	6075	10549	6050	6630	9434	10086	11549	7531	19066	14223	4493	6085	14148	6795	12677	11307	6514	11146	8399	4983	5023	10874	5868	11733	7706	8582	16685	7890	7286	19735	16776	6699	6076	15586	4712	5200	5757	9662	6368	18236	4223	4418	11580	5324	6547	8534	3353
30128	44516	18330	37287	76752	13598	32293	41373	50285	37185	94670	67797	61150	30819	37892	33513	16713	26162	111709	21119	113403	37951	51276	25359	30925	35938	58224	34140	108806	85360	42392	29411	41614	29082	24088	16934	21322	17747	51568	21352	27785	30700	84651	66734	66236	65875	34576	14694	74601	5288
17689	29771	9062	20824	38987	22086	23332	20736	21391	51996	25188	41283	47886	15221	9626	36683	18828	31079	36328	19963	32950	16726	25955	16437	24426	20369	30095	15189	84015	25804	21721	18278	52316	52981	20052	19079	18461	13640	11853	10712	15054	17841	30838	21000	24349	46858	7781	19017	19840	13360
2836	4971	2973	4831	5317	5572	5240	3037	3673	12170	6512	9032	7717	3796	1697	9803	2591	5258	14422	3596	7889	3636	4991	2308	4563	8545	4654	5100	6551	8450	6438	5779	6358	8554	2945	2697	4950	2518	2264	2657	2964	3751	9878	5805	5838	9403	1633	4543	8275	2525
706	1720	359	522	1588	588	3813	1285	1046	2737	639	3500	1547	694	264	1036	1245	902	2114	735	1577	943	514	796	1202	1217	1510	878	1509	793	1421	574	3339	2100	1674	1682	2959	640	199	482	995	1562	1477	718	199	1721	376	2248	292	3636
43	21	5	10	285	15	171	185	45	37	106	108	569	18	614	1171	61	83	278	212	2705	9	4	2474	45	10	45	400	41	597	37	12	203	394	59	50	1382	33	175	5	1566	224	15	58	5	37	1109	262	12	463
1	0	81	252	69	0	130	15	0	76	0	129	6525	0	659	1	3	0	2	0	923	38	0	1520	498	0	0	30	3	19	1	0	60	180	0	0	4299	123	0	411	2	100	90	1162	0	0	105	4550	0	0
20	39	3	5	49	26	49	18	54	108	15	146	26	37	17	42	58	23	39	11	28	28	15	21	59	70	58	68	115	32	42	14	201	44	95	109	96	12	7	13	62	192	36	87	13	86	73	59	4	171
55	93	284	37	260	5	478	1646	525	1671	5	1753	749	594	58	1033	238	281	25	236	103	51	203	58	122	11	288	24	1000	6149	532	823	729	563	185	265	56	315	19	693	1143	457	551	225	20	1615	281	3317	5	530
372	505	316	518	598	411	897	362	1105	1337	352	1688	916	362	460	756	804	467	1328	951	735	259	291	536	832	471	1440	609	1213	936	539	551	1793	834	635	564	819	243	678	784	602	926	837	668	940	1174	422	453	882	414
801	492	42	299	1099	119	407	103	1364	1349	31	1090	108	600	68	119	274	409	529	229	172	180	179	320	415	498	190	199	125	253	159	152	411	407	221	473	660	155	328	346	304	730	378	498	126	1352	257	347	333	536
437	1137	431	789	1330	453	499	1321	659	2214	1665	2168	1345	1044	558	2000	519	738	740	977	1894	769	1047	801	707	663	799	914	836	3468	2074	872	1608	1940	905	681	3879	634	193	357	510	1245	1239	1194	212	1656	666	2241	747	304
1159	1140	1713	1194	2449	1545	1458	1362	2327	4421	1851	5733	2956	1493	1054	2500	1159	2836	8963	1646	3618	895	2340	748	1873	2879	2442	1168	2740	4197	1695	1592	3029	3023	1558	1128	3065	985	2324	1487	1528	1126	2498	1490	1524	2794	807	1666	3543	667
16	31	19	147	50	4	38	29	518	231	42	54	7	46	27	13	163	164	152	108	157	74	18	74	28	45	245	42	44	66	19	9	251	181	120	112	186	14	12	17	66	342	39	213	4	103	12	150	32	11
2872	4847	5224	4331	6308	5817	8037	8907	3801	13470	6859	13275	7388	4188	1042	10480	3021	5642	13009	2879	13634	3332	7799	5118	4498	10938	3715	2776	11412	6323	6146	4134	7850	10033	3948	3536	8051	2943	857	2141	2647	4447	11900	4693	1237	10858	2380	5775	1733	3024
1275	3053	1033	2113	2951	1394	2599	9630	2193	4240	1704	7574	5103	1148	958	4051	1007	1411	4743	1994	4762	2526	1730	1669	2260	2208	2433	3830	7648	4082	5537	2117	2525	3451	1287	951	1961	1450	822	1299	3208	1695	4996	1681	1785	3334	1079	1050	1563	1351
337	849	33	269	940	86	177	300	955	2123	19	1183	383	532	125	472	314	1371	2222	668	181	115	206	294	703	643	289	226	319	782	665	109	430	429	317	424	1040	247	154	258	277	455	1402	420	90	1561	249	954	1032	154
426	1066	431	630	1061	380	1087	1522	554	1529	425	1776	1119	476	383	634	309	722	1625	503	1549	235	1081	489	576	390	686	607	1400	1052	1115	917	801	983	360	281	735	335	561	624	639	507	1682	458	720	1128	538	573	741	463
1646	2275	1832	2370	3649	1103	1892	3721	1595	4992	1787	7302	4076	1901	1277	2605	891	2251	7322	1523	2984	1752	3690	2278	2136	2300	1785	1553	3451	5245	5705	3457	2623	2903	1258	1089	1931	837	863	1802	1841	2333	4958	1981	1575	3775	701	2548	2087	340
343	438	606	530	963	167	378	680	834	705	852	773	389	444	736	1244	341	566	2430	442	800	144	495	388	665	609	1079	470	911	1001	532	686	1132	659	446	360	657	241	459	576	353	706	638	751	740	869	473	515	1254	222
3145	6767	3543	3390	7810	3561	5784	7508	8994	11832	5733	16299	6081	7865	3975	9062	2753	9651	10945	7077	12200	5114	7556	6940	5787	5521	7590	4930	11704	11538	7229	6442	7086	9028	3650	3263	7833	2638	3367	4278	5236	6412	12221	5650	4491	9812	4541	4531	7463	8381
2859	3658	1926	4464	8509	3183	3104	4961	6613	6699	8762	13119	12684	6181	6854	19313	3099	6875	23435	9706	10560	4099	11379	3854	5690	6919	9514	6027	11797	9972	6829	10453	8500	7081	4523	2648	5704	2610	7416	4766	6032	6732	9166	8261	7894	8161	1792	4975	11809	258
1103	1607	1231	2412	1822	963	1388	2320	4210	2461	2096	4171	3562	1659	1451	3246	1527	1682	4853	1797	3249	1079	2303	2070	1826	3491	5638	868	2652	3007	3340	1931	3480	3123	1140	1309	1567	871	5946	3656	1491	1412	2814	1709	5815	7007	796	3164	12025	1353
6049	4727	1109	17600	10563	11571	11244	37793	16481	16823	9948	14755	25013	2761	4057	38734	15630	21303	34776	7430	16244	3573	3462	14278	20742	36154	71492	17227	30870	22646	20143	6051	34301	25585	15577	14573	24185	8681	20241	23448	9998	17629	60645	16656	32319	20814	7504	8963	47748	1988
0	1	0	2	11	0	7	4	77	6	0	26	3	1	0	1	24	3	1	0	6	43	2	0	0	3	10	1	1	8	0	0	161	1	58	19	2	0	0	1	8	25	354	1	0	0	0	45	1	0
2091	1552	2495	2150	3646	5945	1463	3498	1474	9928	14905	4085	4726	8540	876	11738	1324	8354	12845	2479	13244	1362	3408	2323	3310	8565	1894	1789	6003	15832	4401	3037	3261	5372	1877	1656	8280	1893	860	977	1204	2240	10474	3046	1503	3564	1754	2230	2647	588
336	369	81	455	671	204	298	178	847	1526	4988	962	267	709	188	105	477	468	670	438	259	210	265	223	539	586	1667	284	635	455	628	257	1528	1013	543	741	761	423	399	229	285	2695	448	1064	118	1290	161	681	255	164
22	101	40	53	374	50	152	218	347	541	10	377	52	229	470	145	247	314	87	113	163	43	284	57	97	85	156	62	349	288	157	24	1153	247	634	213	162	34	49	102	134	466	315	308	29	261	89	498	17	89
79	86	30	112	226	131	141	81	189	311	70	321	329	93	167	270	163	147	397	415	174	112	112	131	103	133	190	127	254	123	241	56	426	313	185	160	200	49	124	109	122	305	196	211	132	242	84	218	89	67
294	738	222	487	716	91	423	376	120	558	502	541	723	399	247	370	3414	304	174	67	272	182	291	144	572	307	4789	776	404	606	358	462	17655	570	380	1581	219	644	34	111	418	1296	654	685	35	535	71	110	60	77
2162	2658	1108	2111	4597	983	2487	2528	3049	5816	3709	9452	5010	3078	3452	6082	3217	2557	5041	2287	5714	3124	3207	2952	2561	4667	4754	4291	7168	6598	4545	2530	11474	5169	4949	4328	4367	2176	729	1208	4700	9481	3711	5793	1135	4452	1112	4630	1011	952
2990	2242	504	4135	4197	760	4906	982	4442	14624	4038	3062	3271	4438	1726	1034	1571	2665	8441	4177	2154	1551	2953	763	1954	4780	3251	1449	4224	2626	2295	1651	3306	4564	2760	2293	1817	4501	1714	605	1841	11937	3528	3565	1411	8336	204	3030	1575	1136
188	317	628	347	730	101	443	534	771	478	296	536	692	603	484	1185	644	437	893	496	473	388	653	238	513	486	1246	568	905	773	740	187	2492	763	834	437	716	180	468	415	535	641	1286	665	330	424	246	361	611	59
1	10	18	5	6	0	9	2	9	10	10	2	3	19	3	34	61	9	6	0	7	9	5	0	6	9	117	7	6	8	8	35	141	4	74	31	11	0	4	1	5	103	73	53	0	12	3	2	13	9
293	192	156	600	380	148	567	641	792	1025	563	1059	305	521	68	702	365	506	1199	249	193	215	468	261	474	780	701	159	398	306	335	127	858	1628	314	468	617	263	351	515	450	429	834	202	311	1281	36	1898	572	536
4	104	0	12	6	5	6	3	11	89	823	1	85	478	2	5	13	16	29	20	0	2	11	2	21	9	3	3	12	83	5	5	3	50	0	0	15	13	141	10	1	4	38	52	3	16	6	2	105	1
233	349	357	458	570	215	622	480	608	1024	493	963	299	431	280	771	243	731	1498	458	540	315	632	234	401	438	537	288	1100	582	435	663	600	724	268	287	1111	161	405	502	263	590	546	421	192	719	246	478	447	293
9811	2920	576	10027	10372	2622	2619	2861	11326	17938	2406	13766	4804	6143	1061	732	5527	5848	8835	8293	2585	2774	1564	2040	9422	7082	12898	5020	5180	3827	3859	3654	14477	8022	6233	6608	4898	3176	2395	4209	5653	8539	7469	5479	1222	20654	741	7198	8427	1235
175	277	474	286	2649	407	1204	349	684	634	690	666	1665	337	269	1755	2401	713	501	351	369	171	386	670	491	515	3041	358	511	1252	1052	352	9856	1131	5116	1004	487	144	315	487	619	1049	949	1037	1012	453	139	404	864	58
1209	566	52	871	1340	215	571	303	2566	1955	375	1626	281	579	128	104	947	512	1201	794	272	309	210	224	1023	737	4358	358	556	431	422	315	1384	1071	450	998	776	262	855	1125	468	1852	688	810	534	2329	312	838	1711	353
465	669	402	703	862	284	626	1818	1258	3048	501	2485	1591	508	442	708	442	880	4058	1188	578	347	1115	957	1037	555	1553	533	952	1253	1718	573	1301	1978	447	412	720	299	738	826	795	1025	1654	419	836	2085	311	1376	991	543
675	1689	626	920	1790	521	969	2861	1745	4086	1038	2572	2579	917	753	2911	1054	770	2264	1208	2565	928	4057	1216	1926	1191	1651	1948	3274	1695	1694	970	3044	2539	1233	1130	2847	903	389	781	1552	1685	1407	2125	545	2634	843	1724	721	789
2801	1414	1386	1862	2463	968	2991	634	2488	3893	1405	8777	1194	1322	568	349	1788	1974	1595	818	5308	714	805	1151	3865	6877	2868	1575	3221	1218	2649	1243	6024	3759	2235	2578	1779	1560	927	701	1468	2192	10829	2017	450	3171	654	2356	1175	1772
1572	1653	358	1289	2492	1949	3127	2068	1194	4840	1800	5522	2982	1456	628	3992	1568	2598	3676	962	1787	988	2543	1454	1908	4784	1915	1475	3211	2317	1685	1142	3248	4789	1981	1634	2002	1606	501	664	1860	1288	3046	928	348	4376	569	2851	606	2699
71	32	19	149	310	149	107	49	243	99	48	272	41	46	35	51	9	130	462	249	192	48	14	7	594	86	20	72	181	31	47	409	42	384	178	22	154	456	115	84	121	96	305	62	82	114	40	111	817	35
2726	2770	2790	2204	3772	1746	3794	2251	4119	7894	2266	7055	5560	3380	2303	5287	2239	2825	5412	3149	3115	2298	3662	4563	3818	3664	3970	2419	6249	5938	3329	2041	5676	4695	2103	2226	4819	1499	1480	2304	3752	3825	4012	3042	1818	6150	1465	4530	2011	1181
2377	2675	1539	2841	4978	1026	1756	2475	3512	7167	2244	10628	11267	4599	4197	6786	1615	3535	5770	3019	4177	2121	4666	2075	5464	2812	4850	3301	11071	14060	5832	4217	4224	5225	3004	1523	2716	2032	1930	2309	2661	5351	7096	6445	2232	7099	930	4184	3623	196
432	670	413	390	1028	284	459	878	812	1964	1475	2036	1145	628	796	2679	927	1000	908	654	875	571	633	898	755	867	1294	699	2454	1695	1176	699	3158	1073	1129	1150	1583	409	189	222	1050	2197	1221	1465	237	1468	747	1892	166	670
6095	11242	3403	6076	5745	4716	4883	1502	3426	7317	8634	5228	5228	14135	2523	4265	4400	9150	4595	1979	3862	4083	1568	2659	6677	7079	6185	4263	12497	5252	4223	6930	13865	16082	7084	4746	2785	11518	1384	868	4605	10424	8867	6702	1155	6168	501	2507	1863	426
0	0	0	0	0	0	0	0	0	0	0	0	0	0	0	0	0	0	0	0	0	0	0	0	0	0	0	0	0	0	0	0	0	0	0	0	0	0	0	0	0	0	0	0	0	0	0	0	0	0
2	3	1	4	18	6	3	2	6	15	0	17	3	16	12	3	2	7	22	5	2	3	81	3	10	8	2	5	4	5	6	6	10	2	0	0	26	0	1	5	12	33	3	19	1	20	8	26	3	7
1585	2580	683	2131	2526	3450	1581	2504	1889	3476	4225	4034	2831	1006	998	3018	2645	1875	2334	547	1684	1242	4430	867	2384	1207	3464	2292	3491	3613	2456	2648	9259	4521	1890	2934	1001	2372	774	1298	1737	2924	3239	2385	548	2069	360	2432	1171	234
1000	2322	1505	1270	2698	1555	3414	4636	1619	2549	3844	3146	3002	929	891	1497	1235	2150	3327	1323	1786	1471	2125	1108	1325	1382	1543	2163	1918	4051	2718	2637	3742	3410	1728	1692	2008	1050	574	630	1624	2061	2688	1140	740	3666	1257	1862	701	2249
480	638	257	404	928	128	388	383	915	1380	661	1353	466	1063	607	1163	324	655	2320	561	1005	489	730	251	603	435	717	362	1128	636	644	235	866	853	355	435	579	279	497	467	369	802	1415	791	483	773	89	586	1043	64
354	734	780	304	949	250	586	779	668	1568	290	1211	918	522	648	2190	524	791	1507	1109	1190	517	500	1416	774	632	796	415	1685	1160	828	569	2188	1229	971	443	926	263	240	381	706	816	878	960	297	898	361	984	528	205
812	772	333	2806	1647	1302	1230	1001	1860	1365	2061	3329	1412	1197	507	2812	1349	1212	4783	954	2310	1226	3060	706	1708	1319	7708	877	2541	2260	1214	1241	2481	2429	833	1147	1189	587	1468	1733	1661	1408	1942	979	1280	4464	412	1038	2796	1280
885	260	78	1463	1377	872	2010	2400	2282	8121	442	14299	2081	698	64	673	4552	413	3350	349	467	1372	222	469	3688	786	6759	741	6053	866	1337	828	18652	2139	5477	12138	859	1697	478	1424	951	3361	3202	699	1322	2917	437	2025	522	935
468	959	457	618	1564	316	1180	910	944	2158	1791	2194	1326	1146	944	2244	638	1032	2832	885	1848	629	1572	915	820	659	1049	693	2107	2744	1470	586	1924	1204	808	609	1112	345	292	291	797	1799	1291	1915	407	1666	409	1043	303	354
475	1704	1498	561	1552	463	1517	1592	978	2480	445	3202	1030	856	612	2158	539	1544	1408	1087	3351	727	763	1481	1166	627	808	891	2204	1939	1583	977	2022	1589	698	846	1915	459	560	468	795	1404	1647	792	507	2010	1166	721	298	1782
969	1794	1922	1515	1969	859	1604	1760	2383	2465	2230	4461	1818	1423	994	4571	886	2782	7764	2329	3852	1456	1260	1267	1819	2096	2584	840	2730	2491	2066	1436	1964	2249	907	803	2978	755	3267	1496	1162	1399	3235	1245	2075	4762	796	1910	3817	598
2103	2950	1490	1855	2609	1558	3039	3016	2786	5199	2955	8325	4117	3502	1354	5434	1588	2761	4237	1639	4059	2196	4087	1209	2339	5042	2478	2499	5569	2859	3487	3740	4278	7320	2090	1776	2974	1600	1616	1389	1394	2750	4405	2627	1062	6223	904	2457	2266	1849
984	2199	1565	1251	3657	461	1795	4354	3597	3690	1150	11713	4330	1581	1172	2424	1467	1640	5151	1057	12311	2926	1750	1313	2954	1437	2764	1829	3630	3015	3344	1456	4230	1638	1816	1720	2239	1075	954	2459	3611	2215	2905	1978	1868	3713	864	2288	2063	1712
9150	11348	4694	9856	16922	4719	6842	13227	7550	32179	20181	27348	15774	17158	6750	20776	5612	14386	34715	12966	27214	8909	18612	6706	10653	10707	12215	9353	27446	23698	13248	9637	15415	17417	7507	6148	12241	5480	3054	4706	7196	11084	28639	12007	3298	20324	4521	10968	7995	1813
12	12	20	15	28	14	14	25	10	26	100	31	19	23	17	159	15	55	68	33	37	9	15	2	7	10	26	19	26	22	12	11	57	26	21	10	300	10	26	2	24	15	1313	41	6	12	6	12	12	4
847	435	316	2863	4521	1281	1007	13167	457	4625	2927	16057	10711	5676	4240	643	129	978	1740	760	18914	236	1063	1469	1269	2328	314	8841	6115	1062	10188	5369	410	867	326	174	426	1634	275	919	3871	3728	8776	3851	837	6900	1494	1531	474	539
661	568	294	808	1387	433	1205	963	732	1529	2309	2436	2279	1110	684	3156	617	1140	2805	764	2286	944	1426	847	960	1610	1036	1088	1605	2919	974	1219	1509	1346	861	669	1257	630	416	604	1377	1245	1472	1039	559	2169	286	787	988	475
1492	3739	2457	1820	3717	1456	5959	4890	2692	7438	3300	7308	3353	1582	1287	3303	2424	2984	5907	1581	6719	2041	1894	3085	2428	2137	3073	2482	3219	3435	2780	3354	6072	5128	2124	2747	5081	1628	928	1544	3123	2944	4356	1215	730	5089	1774	2588	1171	5971
1548	1159	256	4336	5404	2785	1350	2447	3034	3192	8142	4359	4542	2553	987	1753	1154	7268	13599	3547	1800	5051	8086	350	2996	4476	16247	7999	4100	6371	2105	4751	3615	9228	1325	1302	2257	3488	4366	2892	5559	2902	9120	2055	5665	3832	329	3180	6330	277
370	1247	865	731	356	7258	973	1273	523	1923	3897	1556	1162	2096	242	6973	86	3170	12639	2625	5480	605	5135	700	722	6499	208	209	3784	2463	1792	1398	128	3457	117	94	1784	552	1867	628	220	244	2950	793	1231	3932	581	593	2159	1466
1377	2498	1087	1808	3264	624	920	1552	1803	5419	2116	3488	2589	2297	1222	4227	1293	2421	4299	1992	2674	1883	3123	923	1733	1129	2117	1934	4647	6000	2317	2542	3643	3095	1718	1632	1483	1304	313	688	1090	2183	4614	2509	364	3143	545	1509	693	287
1521	1756	2114	1874	3295	1212	4503	3764	1498	3513	2105	3980	5709	1201	1062	3303	2302	4084	3992	1505	5800	1527	4537	3007	2866	2182	3009	2681	4267	7162	3504	2500	6422	3768	2625	2322	2357	1740	771	1193	2466	3210	3333	2156	865	5174	1491	2099	1126	2089
28311	10860	3836	30079	22042	25915	26055	11435	65032	19917	2057	35751	27919	7121	3703	2455	19574	13312	31156	4399	15495	8432	2981	6948	28542	11456	52639	24745	38986	9024	13071	21436	50710	69417	59725	33017	7759	28414	38390	24063	21265	21537	18439	8749	25937	37924	2935	6050	42473	5653
202	604	915	637	1060	160	239	987	1183	916	938	1555	835	888	733	1107	204	2319	3189	447	553	822	664	1011	466	766	1005	528	1003	924	543	528	711	816	360	253	525	290	866	1104	543	745	1076	701	1381	1130	358	826	749	66
1067	2264	2599	1725	2693	965	1692	6869	2601	3543	4078	5162	3259	2149	1362	3046	1500	4616	4759	2013	5694	1789	3662	3619	2165	2585	3080	3776	3434	4625	2959	1661	3712	4701	1871	1285	3242	1155	1850	1685	2374	2017	3460	2903	1455	3161	940	1745	1713	328
997	1171	1624	1313	1722	380	1996	1578	1056	2638	1090	2260	1939	552	415	2099	861	732	1495	771	1452	865	605	1076	1394	1553	1150	987	1409	1751	2169	1175	3318	1780	1415	1062	1203	612	403	521	910	1308	1713	1172	375	2376	490	973	575	1433
851	1583	974	1512	1765	1032	2608	2969	2376	3701	2110	4563	2284	1511	903	4808	1112	2459	5371	1388	5670	954	1755	1901	1587	1566	1627	1637	2655	3072	2170	1178	3431	4058	1011	1267	1866	791	2159	1389	1706	1411	3026	805	2768	5366	889	983	4559	3613
93	64	18	37	103	8	82	4	101	80	6	105	22	82	20	116	26	143	89	20	19	15	35	37	38	55	20	11	16	48	28	19	72	69	20	20	76	10	72	31	31	93	66	72	7	85	19	18	35	15
3088	1449	358	5563	3910	694	686	1610	14565	9319	2785	6690	1770	3795	1020	525	4672	3099	9481	6276	1525	1656	2065	477	6081	2965	40016	2566	3691	3174	3106	1113	9412	4407	1954	4169	2333	1436	9045	7686	2492	10836	5167	10118	5080	12083	217	4768	22382	321
2149	1403	3363	4122	3051	1228	2640	3086	4745	3204	1195	6636	4041	2258	3085	1760	778	2867	2840	1231	693	2739	3209	4214	4557	1160	2144	1266	5652	6696	1869	1738	2761	6500	1656	1063	1360	713	2149	9746	1834	1972	4179	1127	3760	3611	1503	2499	5238	299
2	0	2	0	1	120	3	1	1	2428	853	0	397	0	0	900	6	8	16	420	196	0	95	0	2	1	0	0	1	4	0	0	9	1669	4	1	616	3	3	1	198	12	0	145	10	4	0	383	159	0
209	564	735	284	461	787	578	464	224	1769	690	1168	527	766	69	2390	255	1581	3002	1303	2364	223	721	216	514	2345	287	172	925	1189	726	703	812	1627	297	244	1740	333	219	158	334	319	1014	491	274	1087	297	338	482	601
1121	2084	2045	1608	2241	736	1315	2354	2268	2458	5285	2224	1541	1998	1065	3001	965	2674	6782	1432	2367	1474	2394	1957	2036	1366	2655	1881	2144	2315	1582	1276	2971	2732	1381	977	1372	834	2147	1284	1499	1993	2954	2381	1628	2436	668	976	2342	240
3201	302	32	349	827	174	280	94	1039	411	17	1390	166	499	92	115	252	209	617	74	142	245	103	173	358	175	1182	234	75	125	139	112	698	389	250	483	473	111	108	211	328	1227	155	1310	46	783	69	160	111	137
270	222	41	1226	1531	364	426	655	723	265	45	1572	1180	1774	4565	1228	3941	1232	12110	223	304	870	1389	284	958	991	3616	2115	3283	2660	762	2477	12620	953	4087	4105	223	320	176	281	1748	2812	12458	1889	298	1336	36	408	590	110
667	1098	747	1394	1547	587	821	3258	1106	2704	1295	5056	1845	425	479	3889	492	1492	5513	1096	1467	1101	1483	833	2678	1511	1065	956	2270	1885	1054	1447	1587	2399	704	609	1170	948	450	1422	1244	866	1813	689	561	3615	442	3364	1238	1447
266	471	282	461	637	135	271	941	556	1343	663	1433	401	746	368	1271	254	532	2037	543	320	459	812	221	626	543	499	326	1038	932	729	364	651	628	321	282	702	264	206	492	337	528	1290	513	266	1490	169	1614	634	63
26842	5008	142	1219	82130	709	5201	686	8389	699	52	4137	7216	8171	1288	3628	1584	631	2622	4794	2151	5103	5416	865	13351	1342	908	7046	3252	3477	181	5121	8136	1198	659	316	5591	95	1769	933	7270	6395	1608	4972	138	838	1058	165	3621	19
1042	1026	506	2460	2337	1071	1059	1616	2293	1624	2700	4356	6825	1793	938	6780	1255	2962	3597	491	2743	3444	2288	699	1664	2382	1917	1866	2367	4252	2081	2394	3728	3631	2248	1443	1744	1506	448	921	2047	1957	1497	2637	533	4404	499	4513	3188	550
5	1	18	0	4	0	21	1	1	866	4	5	1	1	57	3	4	0	3	1	3	3	0	34	5	0	13	5	0	45	5	89	17	30	4	5	1	1	0	2	1	12	1	7	0	5	2	0	165	0
4199	2469	7682	5936	4486	3813	5415	4727	6645	13135	6599	20813	11755	3426	2695	13278	3952	4874	23703	3319	7534	2337	6516	6572	7320	4805	8737	3914	10059	9071	10584	9983	7578	8850	3859	4028	6444	4430	3361	4154	4957	5387	4943	4678	3407	14497	3453	8467	8189	3596
1872	691	143	4925	4124	534	1388	2336	4871	3850	931	5670	1109	1395	318	231	4183	1557	2289	3328	534	1137	3349	380	3823	2672	28776	1549	2713	5224	2832	501	6548	4249	1809	4056	2724	789	1117	2926	1520	12437	2017	4000	684	6505	271	5423	5626	807
1	0	1	0	3079	0	7	273	1	0	775	0	2394	2215	265	2738	1089	0	0	374	2654	0	0	4281	2	975	0	2578	1796	7215	760	1782	2	2885	1	1	1317	0	288	272	0	4637	593	2370	118	1593	0	0	361	1348
1904	2639	1372	2088	5627	1053	2040	3652	4780	6585	2661	10423	3965	1888	1502	2271	6398	2734	3952	1975	3623	3102	3657	3856	3469	3006	10461	3887	5218	8688	3864	2895	15255	4361	5436	5704	3496	1469	847	2332	4693	8828	3487	4279	666	6471	2088	5512	1087	1148
1095	1748	1388	1453	1752	1209	1429	2601	1948	2822	2913	2519	1695	924	613	1317	968	1100	4819	3069	2863	1039	972	928	1113	2024	1749	1417	1989	3518	1961	1344	2622	2244	1364	970	3055	836	1200	1055	1127	1244	2171	1400	775	2704	998	2515	1277	490
876	2594	1039	1659	2483	1596	2485	3278	1577	2751	2484	3253	1947	3557	1122	8471	1277	2095	2757	1889	3476	1232	1417	1590	1644	1294	1710	1757	2239	3554	2895	1805	4121	5265	1576	1480	3634	1212	542	768	1249	1878	3364	1718	785	2865	1440	2453	890	2742
992	885	478	541	785	782	683	337	450	1033	780	1210	895	908	319	987	437	1264	1854	361	952	433	733	258	837	371	528	654	549	910	687	623	2584	1614	499	566	439	964	260	172	521	631	845	459	62	719	216	276	658	172
2022	3570	5346	3053	3826	2504	2906	5316	4109	10049	3565	9370	7444	5371	2805	5681	1629	8490	11336	3804	6016	2604	7352	5290	3805	4666	4565	4270	5323	6877	5203	2912	4438	8973	2107	1515	2823	1774	4257	2293	3053	3155	11006	3581	3747	6376	2852	3158	33834	379
2361	2212	762	3330	6298	920	2214	6266	3002	8036	2987	8450	12697	2522	2196	12626	2806	4727	6933	2072	2414	2225	5371	2413	3664	3355	6857	3022	4848	7422	7991	2476	6518	8584	2969	2659	1808	2588	605	1685	8003	3793	3597	3061	717	6463	1346	2964	1716	939
1	0	0	1	4	0	4	0	5	0	0	1	7	0	0	0	4	3	0	0	2	0	0	1	1	1	1	5	0	2	0	0	8	0	2	7	5	1	0	0	0	1	1	10	0	1	0	0	0	21
163	35	140	240	265	93	51	46	166	168	60	137	133	39	311	43	271	273	95	7	816	70	27	100	270	40	490	342	27	59	45	96	1178	642	311	247	401	287	370	76	158	320	44	1648	20	385	71	15	489	157
3440	9100	9887	5612	8971	2155	2571	8292	6375	12876	4544	15822	9141	14215	7208	34677	2081	7472	31270	11901	7303	4541	8656	2902	7224	10565	7270	4925	16086	9887	12685	6958	4909	10345	3018	1936	6418	3709	4119	4709	6512	7257	19863	10031	8973	11082	2514	10510	18887	330
10821	11794	3377	22825	20339	3914	14284	23891	16017	24045	22916	39579	31253	9694	12627	21307	9903	7710	48972	15335	3768	13079	21895	14167	23075	15235	18723	10867	34922	33427	22471	10890	20484	28047	12638	8595	8763	4252	3365	15427	11592	17761	29083	17998	4110	30681	2342	63156	11927	1330
2527	2721	1508	3095	4720	2091	2852	2447	3428	11618	2371	7471	4363	2150	1553	4491	2535	5922	10301	3976	4910	1984	2750	2113	4034	7540	4193	3273	5233	3814	5133	3574	6280	5430	2701	2721	5345	1738	1962	1527	2102	3602	6876	4441	3395	10097	1285	3562	4496	1340
577	1053	745	1206	2319	1407	1885	1385	2152	4311	2398	3358	3486	2080	1076	3644	863	3028	8347	1247	3455	2087	2316	968	2249	2787	1673	1154	2805	1961	1595	2234	1991	3362	1061	870	2362	1538	1501	1324	1954	1206	3396	1112	1169	3094	913	1379	2592	1537
132	357	144	289	629	168	267	274	1134	583	253	1029	560	425	275	784	257	359	1237	247	565	615	218	139	474	402	597	251	728	341	460	442	655	572	343	231	463	249	713	650	351	459	525	333	613	725	255	404	859	154
1068	2267	1167	1894	4044	1387	4091	1860	4617	3626	2043	6576	1811	2195	2159	4190	2353	2106	2734	2075	4279	1545	4022	5049	2125	2189	5138	1979	4515	5906	2525	1587	8295	3105	1837	2830	6603	930	2346	2523	2258	6223	1531	4089	2829	3958	2646	4107	1593	3329
339	678	259	251	693	462	621	391	378	1029	545	730	766	502	282	620	370	753	2519	306	1032	264	1015	286	372	595	508	301	924	976	456	522	917	916	498	420	577	232	178	232	227	513	892	444	172	1124	144	379	414	384
773	810	881	560	1480	291	1180	1202	1805	1671	778	2089	629	897	613	1777	741	1186	974	927	1266	1191	547	861	747	901	1643	1013	1105	2583	2294	1341	2250	1402	940	977	2141	632	538	628	894	2359	1776	1005	501	2744	885	1826	1028	672
1022	1860	1045	1974	2691	1000	1638	2418	3945	5470	2558	5160	4180	1530	1043	2007	1360	2052	4507	1787	4044	1543	2506	1360	1997	1814	3377	1869	2739	2676	1892	1324	3524	3170	1502	1369	2159	957	1846	4044	2589	1830	2599	1872	1763	4030	1212	1747	4415	913
231	479	277	520	475	157	279	981	524	1045	368	796	686	542	325	1847	260	538	1280	550	387	341	1117	552	676	819	993	242	642	439	936	144	823	905	369	330	818	213	436	463	518	615	1227	458	381	949	90	764	831	105
316	721	231	334	1343	933	308	1067	455	3167	1660	1354	1171	1017	492	2059	429	1525	3101	846	2951	945	4228	1119	842	2217	788	901	1598	2023	1533	772	1451	940	752	358	2921	249	138	107	984	1897	1060	1016	264	1693	715	274	477	338
1189	1112	1442	1764	2449	1035	757	2461	2455	2545	3670	2941	2590	1372	938	809	1505	1756	4920	1081	1077	1013	280	766	2001	2716	3670	1455	2717	2963	3367	2003	3968	2248	1698	1665	1714	905	896	1684	802	1991	2692	1639	2181	2098	714	1265	3057	323
27007	21152	15339	24497	20546	15207	7804	73770	20235	18813	5854	42372	53002	41567	21298	80004	50975	41819	27357	3378	7833	15478	75940	10194	24821	7816	66207	33002	56656	41113	19812	37778	103229	17643	35937	46788	16372	4656	1297	17836	24916	34420	77488	22792	12897	41015	7512	25472	8099	13121
173	250	65	532	207	265	128	266	198	1079	547	2285	360	90	33	35	190	122	131	59	2626	112	1093	140	295	6598	278	187	145	253	165	333	473	1105	199	277	91	227	129	336	216	261	1522	389	23	268	21	1152	180	106
1942	813	98	523	2379	150	324	153	1513	2445	25	1877	197	1410	87	316	392	949	1013	396	238	347	215	425	1145	769	488	417	285	443	293	347	1033	607	468	1391	1665	190	307	441	679	1814	891	1217	63	2238	227	484	577	246
1044	1320	1442	1263	1622	902	587	2052	1178	4563	3576	2324	1805	3211	959	9133	436	4437	7367	4716	6262	891	3800	897	1348	5143	1287	585	5796	4991	3221	1447	846	3099	368	560	3239	831	968	681	794	1648	3716	3180	730	3688	1110	1528	2180	349
980	1555	1144	1312	3278	1158	2172	2865	2684	4901	2097	5233	2495	1176	1068	2873	1285	2374	4595	1951	2435	2576	2767	1352	2011	2230	2252	1932	2640	2505	2220	1686	3338	4621	1414	1431	2311	966	1288	1842	2572	1862	3339	827	1151	3668	880	1661	1513	1582
100	112	194	100	159	75	96	135	177	400	335	400	96	290	195	331	84	153	330	331	255	84	191	155	136	557	201	73	487	248	313	154	334	179	118	84	372	78	82	108	106	244	328	441	156	320	78	174	231	90
828	1134	784	1050	1902	273	980	2366	767	3857	2321	2651	2332	1963	1411	2397	723	1753	5347	1733	1977	769	3149	805	954	1154	1413	1361	2951	4762	1784	1270	1978	1333	797	721	878	563	379	717	747	2127	3669	2347	582	2925	484	970	971	199
8043	10523	8681	10152	14398	5363	6088	27962	11816	24100	10612	39496	24773	12118	9598	12678	6385	8428	22803	11873	7386	16815	14244	6691	11550	14853	8255	11184	29438	21264	12722	12199	16301	22149	9253	6510	7134	5064	3732	7440	9790	11330	25292	10840	8823	17594	2296	16331	7816	730
121	175	410	235	409	112	250	398	298	583	163	465	861	721	78	600	148	590	1865	332	445	342	335	316	255	356	590	186	759	407	397	192	268	336	202	140	572	76	183	293	250	154	901	295	279	1592	99	1080	191	291
2585	5736	2894	3232	5939	2309	2917	6054	8092	5999	4972	10157	7595	3680	3750	12856	2600	9467	16719	6442	12481	2877	7021	3024	4342	3781	10973	3854	6336	7362	5910	4506	6740	7795	3471	2357	6869	1784	7505	4469	4609	4602	6994	4397	5250	6706	2527	4505	9702	934
1748	5627	1091	3125	5225	1429	3489	8033	3540	4838	2596	14506	6451	2236	2158	5727	2194	3425	7306	2821	9178	2753	4909	2879	2725	3317	4226	3272	8541	6969	7039	3533	5551	4801	2497	2049	2684	1611	2219	5230	4170	3133	4220	2183	3325	8588	1971	3462	4711	2999
212	2722	254	1120	677	322	280	1004	667	1394	878	3152	963	1543	303	2591	369	3377	3050	703	1068	198	6391	2062	777	753	1023	601	1600	5988	3176	1028	920	1102	581	389	1408	290	742	816	736	565	2380	272	452	1765	871	1410	1690	267
879	1536	840	1205	2763	663	1132	2514	1133	2231	1120	2330	3962	1074	981	2322	806	1286	3183	1053	2397	886	1937	1229	1736	1650	1816	1392	2494	2033	3249	1806	2299	1046	1080	843	1446	729	1223	1281	1509	2128	2122	1232	1144	3785	765	1629	2164	1224
2084	4027	1389	887	4797	418	6000	5086	1556	5266	522	5223	3076	1373	1388	2046	2518	1497	3158	865	4839	2871	1651	2190	1775	2625	2762	2791	1923	4300	3517	1721	10026	3049	4025	2398	3128	952	285	831	1950	4198	4358	2570	344	3181	1451	2243	431	929
449	587	270	469	844	390	780	715	1154	1265	1351	1452	601	374	323	498	421	883	1907	503	1400	400	562	599	660	1072	1175	460	695	1077	530	601	1063	801	376	437	610	340	849	747	779	511	1026	369	576	1216	460	346	2081	1256
2337	6744	1916	3309	4884	1692	5008	9133	3306	6860	1964	8578	6460	2599	1639	10197	3695	6906	9656	3867	6454	2237	2655	3988	3701	5703	4613	5753	6320	6374	8211	2763	9158	7074	3504	3535	4670	1932	1218	2610	4420	4374	7907	3682	1516	5595	2746	2734	2957	2227
1937	577	105	1228	1794	134	270	264	1474	2634	462	1640	339	1310	217	177	860	913	1519	1171	387	437	538	339	1265	823	3255	413	776	628	463	358	1371	974	545	933	789	413	398	569	595	1753	1057	1314	243	2294	244	1243	796	139
434	122	275	159	67	56	238	30	203	172	63	161	286	56	201	8	2	102	255	20	105	13	32	176	123	52	22	128	132	168	95	122	9	1136	7	3	39	72	190	52	157	89	136	66	13	388	8	47	114	11
577	1238	1132	1181	1627	1472	661	498	3090	2203	1338	1265	1197	736	865	973	708	1654	6533	1147	1430	1772	2079	291	1354	895	3301	779	1349	4787	856	2801	1393	2835	702	695	1262	621	3206	1831	1249	1033	3118	1090	4856	1208	287	556	3239	219
22	89	24	14	85	57	651	62	82	204	31	192	52	40	61	120	66	101	64	40	264	69	98	214	77	56	46	87	173	182	151	121	246	58	79	135	387	34	24	45	55	225	46	59	18	106	134	118	7	2069
0	7	0	38	33	7	3	48	30	39	33	94	15	7	56	24	8	17	99	15	1229	15	36	3	14	96	12	9	93	175	43	8	30	228	6	13	30	22	5	6	99	34	221	556	0	10	8	32	54	0
1351	1644	1550	449	2014	523	1775	1920	1629	4415	1219	7264	2378	2288	952	5047	793	2285	4223	2971	2803	1556	1600	2234	2835	2171	1407	1216	3584	5288	2447	1283	2712	4183	1387	992	2740	1087	1098	1169	1717	2335	4847	2020	657	3946	639	1972	1104	303
1	1	1	0	2	2	3	1	1	2	0	1	0	1	2	3	9	2	8	0	3	1	0	1	2	1	1	0	0	2	0	0	22	98	2	0	4	0	0	1	5	0	2	1	0	4	0	0	0	0
3	0	0	0	0	2	5	0	0	2	3	1	0	6	3	0	1	0	0	0	2	0	0	1	1	0	0	1	1	1	0	0	1	0	1	0	1	0	0	0	2	0	0	6	0	1	0	1	0	0
2861	3866	1931	4425	4442	3743	3970	6622	7171	5109	4170	9443	6775	2786	2762	7617	2705	3134	13756	3500	5431	3740	6230	3395	4714	7255	4993	2654	7460	7753	7532	4621	8200	13811	3850	3135	2979	1955	1805	3142	2456	4469	7972	4796	2509	11201	1387	4895	5455	1475
2	17	11	0	5	0	78	2	0	6	0	1	1	1	3	0	2	96	0	0	981	4	7	1	5	1	2	1	5	2	0	1	36	12	13	4	9	1	2	3	0	3	0	4	1	1	0	1	0	0
144	1555	108	298	481	96	365	883	578	355	5	1473	667	669	507	1867	283	931	1635	688	875	395	333	270	1080	788	1241	497	1887	785	1304	558	839	1685	415	308	1097	326	82	618	571	1218	600	873	382	1928	314	788	442	140
153	42	2	133	917	192	467	57	576	790	22	160	629	96	457	1117	1308	2029	3774	52	231	370	47	29	383	778	1394	365	113	1457	129	168	2908	762	911	549	286	189	181	553	528	357	46	184	94	150	49	11	208	75
0	0	0	0	0	2	9	0	3	17	0	0	0	0	0	0	0	0	0	0	3383	0	0	0	0	0	3	0	0	0	3	0	2	0	0	0	0	0	0	2	2	1	0	2	1	0	0	0	1	6
1	0	0	4	8	99	98	4	1	3	1	14	5	1	4	2	6	2	0	0	7	0	15	10	3	0	30	0	1	16	0	0	50	8	10	3	0	0	0	1	2	11	4	1	3	3	1	1	0	4
1111	1505	544	1716	3113	1427	1851	1562	2670	2762	3084	4418	2740	1280	1586	4468	1541	2355	6106	2481	3232	1346	1700	1570	2103	2451	2440	1562	4017	3232	2013	1593	4573	4105	2316	1454	2205	1378	2131	1626	2018	2319	3236	2129	1671	3305	1305	1455	2123	683
3079	6567	2843	4077	5733	4624	4823	5446	6170	10446	8242	10987	5696	2851	836	7347	4600	9686	13226	4651	12101	1727	4307	3051	6054	6043	9302	3048	5117	11733	4419	3764	10424	13807	4990	4392	15860	2703	3055	3241	4589	4878	6202	4157	3249	11257	2103	5900	8804	3197
215	63	36	314	166	43	342	25	240	56	106	211	300	21	20	36	50	40	351	34	155	37	54	68	168	38	73	83	75	144	91	219	120	142	134	25	31	514	259	95	103	34	52	38	45	194	65	28	138	67
509	2710	509	328	911	1293	272	356	835	684	126	1081	2335	1097	1120	147	576	1059	680	306	477	1039	354	144	2132	364	1057	686	1501	370	432	804	2081	1839	817	923	2351	727	1714	623	430	1919	713	573	3102	1176	669	156	900	51
2440	4448	2978	3540	5138	1789	2681	7907	2288	4254	8884	11244	9069	2324	1821	14898	2769	7772	7069	4471	14176	3145	4413	3319	3984	3442	4355	4830	5129	7740	7763	4332	7187	9919	2977	2778	4930	2403	1163	1512	2544	3464	4844	2756	1449	5576	1541	2147	2676	998
875	5119	276	737	1959	626	1710	2331	1973	3492	859	3857	1754	1471	3452	7242	1364	1465	2217	2188	5939	872	1559	2593	1520	1381	2212	1553	3568	4525	3336	1400	4276	1878	1512	1706	2333	752	533	2166	3061	3587	1880	2137	634	4603	3596	2240	932	4510
300	25	22	34	121	197	505	43	163	873	5	486	239	818	4	13	247	66	7157	294	410	81	363	76	287	41	558	108	843	363	92	33	748	1504	485	300	261	73	34	535	136	430	212	97	26	750	33	1051	83	152
406	309	222	815	793	463	1034	741	1954	2501	1289	2219	331	621	597	910	2590	1986	4479	1894	1543	474	734	201	1534	933	24051	797	3129	1385	2439	740	5402	3018	854	2047	1940	630	686	1463	658	9402	891	3685	738	2585	142	6179	1654	591
2924	7633	3968	5247	3604	3593	4144	1760	3411	4969	11795	4327	11969	2032	1353	3374	5052	5045	22634	4245	3621	4338	2946	3934	3669	3311	9239	3330	8127	6339	5153	1898	13675	9439	3937	4260	22275	2903	3055	1966	4652	4505	3435	4890	1565	4646	1464	1857	10160	2046
1738	3001	2186	2333	3088	2613	3444	3553	2434	5936	3967	5355	3676	2900	808	4881	1637	3360	4520	2595	3411	1507	4144	1371	3318	2060	5053	2096	2842	5635	3252	4048	3938	5343	1831	1874	2325	1787	1910	1473	1843	2241	4773	1974	2061	4744	1659	1555	3251	2371
0	4	0	1	0	0	2	0	5	7	0	2	0	0	0	0	0	4	8	0	1	0	1	0	2	1	0	0	1	0	0	0	2	1	2	0	4	0	0	0	0	0	0	3	0	0	1	1	0	1
727	883	1066	736	1066	1024	1041	1372	1233	2103	1059	2860	1252	776	505	1889	606	1092	3414	1250	2430	729	794	933	1248	1396	1534	761	1744	1718	1606	709	1908	2286	744	619	1590	437	812	1165	774	954	1108	1191	940	2187	600	2207	998	335
87	28	61	119	246	14	323	113	82	72	34	152	500	142	77	54	206	6	52	31	31	52	19	124	205	24	555	125	12	87	340	21	1598	68	431	296	35	26	26	39	152	431	26	89	11	281	16	50	37	45
615	1033	555	609	1017	404	907	1607	772	1808	1266	2535	1533	744	573	2977	402	1663	3201	1052	2048	638	1022	602	1192	696	849	676	1061	1323	1236	1228	1424	1442	716	528	897	407	632	575	484	587	1916	804	1108	2041	458	695	1123	510
47	17	22	43	130	56	80	91	84	136	6	250	84	24	30	27	59	94	100	33	20	15	85	32	46	64	130	35	151	30	66	55	168	140	49	67	83	30	95	119	35	81	95	38	32	102	17	85	124	32
365	1568	10	713	1068	43	617	1392	3456	2209	9	156	4516	1537	709	58	2222	55	404	70	138	389	290	1841	365	79	3758	448	1577	553	1007	629	5243	333	1681	1935	948	489	113	1774	633	1862	745	2089	60	334	465	2501	325	35
1258	1810	1056	2559	2386	2254	3903	1924	2255	5525	3989	5688	2871	1227	908	2254	2285	1945	2779	2664	1956	980	1502	1247	2071	3236	2448	1953	4939	2460	2902	2454	6544	7211	2594	2757	3264	3196	552	1996	1794	3025	5671	1711	662	6285	683	4726	977	2801
840	30	106	2133	3444	65	707	2569	4656	1739	2065	6331	719	2588	487	128	12741	3079	1926	8636	652	2343	307	175	6389	1325	66309	2291	2479	3578	7733	471	14381	9377	4773	11050	6646	685	556	4613	1828	17420	1495	7900	244	5249	145	2681	6756	145
16	232	332	13001	39199	3385	321	302	309	316	989	318	9902	12067	9034	677	106	96395	417	23	187	603	28932	661	758	3364	315	1271	119	209865	1282	11189	184	523	68	51	287	2703	305	512	3339	1663	3781	608	17	332	5771	52	1698	59
273	655	435	275	457	321	713	612	583	748	483	645	918	366	131	743	672	490	745	129	417	430	290	544	407	206	846	492	832	919	525	403	2245	597	803	761	1402	270	134	187	553	909	828	615	71	554	133	723	384	189
45	0	0	0	5	81	54	287	23	1255	0	0	1289	5	0	1	67	35	10	55	3979	19	210	34	200	0	7	208	0	3855	178	285	332	759	6	23	2645	0	45	7	642	10	2	2496	2	10	11	29	2425	2
305	549	163	690	349	1752	415	164	371	452	16800	746	781	131	157	69	141	422	586	183	302	84	4653	199	715	406	226	741	494	771	367	1062	429	1510	420	305	234	752	500	107	137	398	506	150	320	926	180	63	544	268
234503	143526	11000	185385	440333	32833	63208	51265	543231	611495	48162	245407	77650	167433	60004	20278	153355	147815	241534	228057	34323	159412	39513	41969	370659	173288	562535	93342	152081	116210	120453	38248	306726	269553	147667	190986	143437	50248	86777	268295	166175	349545	203171	229015	36408	530872	45412	519538	262827	22217
1145	398	317	767	788	407	1351	606	920	551	407	1143	671	374	152	104	607	334	2027	81	702	296	77	369	715	303	664	829	294	291	555	585	1435	1044	948	825	122	426	331	302	650	955	337	335	152	1233	73	577	434	1027
365	615	285	470	954	459	1165	995	361	1284	856	1655	1151	252	73	696	483	633	1166	533	1602	322	461	408	588	548	727	937	1042	1250	732	573	1244	795	535	506	606	398	202	257	617	552	890	312	226	1056	244	506	310	591
1119	3681	823	1058	1910	749	1558	943	1460	6146	1468	2712	3306	2003	1210	2567	794	1412	3298	1027	1823	1643	1644	1041	1350	1923	1609	941	3767	3095	1736	868	2633	2352	1432	882	1758	1080	342	893	1606	1944	2158	2411	308	2776	665	2093	674	171
1295	1199	746	2729	1677	767	1077	865	918	2160	1574	2212	2223	688	327	427	998	1751	1916	166	836	540	1183	379	1821	932	1110	1698	2029	1266	1481	1590	3409	4259	1733	1173	581	2953	312	302	857	1605	1550	1017	186	1533	140	741	576	128
0	0	0	1	0	0	0	0	0	4	0	1	0	0	2	0	1	0	0	0	0	0	2	3	0	0	2	0	0	0	2	0	3	0	2	0	1	0	0	0	0	1	0	0	0	1	1	3	0	6
507	962	591	807	1179	397	583	1208	853	3719	1087	1666	1715	1054	532	2070	358	740	3529	1050	1771	653	1153	720	915	528	586	993	1831	3047	1234	925	1133	1296	527	436	1076	630	436	496	675	739	1660	904	310	1329	304	949	843	180
231	648	441	391	691	336	850	1140	591	630	951	864	537	596	317	1299	278	562	1424	807	1156	365	517	428	273	570	597	527	528	1273	727	227	861	1297	397	239	2429	193	521	414	355	399	1323	913	537	1081	497	715	508	386
412	1433	162	1906	839	918	6875	902	1111	1417	1810	2476	801	1992	232	584	1449	829	2142	438	278	829	433	1051	768	347	1507	746	3544	4503	1112	418	3245	4319	1361	1682	1581	985	401	695	553	1390	3803	817	344	3784	239	2560	588	2437
3059	1100	135	920	2613	648	478	224	1623	2527	134	2107	452	1351	105	284	1127	1128	961	563	356	459	1049	466	1451	686	1568	559	1455	631	376	313	1403	2120	646	1094	1246	315	269	432	706	1590	925	737	152	2540	299	487	559	344
588	1519	744	782	1742	669	1980	1717	1234	2162	1539	1994	1586	1238	610	3565	656	1584	1701	1017	1709	951	1467	746	1530	1086	1013	769	3680	1213	1474	1489	2286	1650	967	859	1759	596	598	808	475	1438	2216	1102	771	2595	949	939	502	1682
684	2841	4033	428	2201	17	520	1813	2612	1059	42	3390	2536	691	2142	17349	1517	1500	771	1044	2087	808	100	708	1363	1219	3209	449	2952	1777	2294	1214	4963	1146	3115	1070	1309	534	178	1964	1604	2167	5385	1977	781	2795	1824	6324	1415	148
6324	10258	1413	11786	13024	4744	4477	17509	15553	10386	1342	28759	13782	7759	3520	10247	6640	8892	24622	5003	5990	12000	16486	5180	7434	16596	22829	13042	12215	13289	6091	9126	13269	6872	5327	3692	4419	2005	5149	9555	7342	9873	30915	6519	18769	18255	4279	4511	22002	1449
0	7	3	0	0	0	6	0	0	1	0	1	1	0	1	4	3	6	2	0	4	0	3	1	0	0	4	0	0	0	1	0	12	1	1	4	3	0	1	1	1	3	0	2	0	3	2	1	3	2
0	5	356	4	8	3	7	1	7	22	1	10	4	15	10	3	7	187	14	3	10	8	16	11	5	27	10	9	50	51	8	28	27	22	9	9	42	3	9	1	1	25	4	122	2	14	15	4	111	0
850	1513	1803	991	1804	783	1897	1833	1715	2784	1513	3427	1991	880	570	2518	775	2464	2203	1053	3558	808	1220	1201	1653	1594	1524	988	2555	2248	1681	1599	1844	2380	725	783	1764	812	1236	1070	881	1013	3111	748	2309	2328	516	558	1541	1259
251	63	141	264	284	24	930	370	258	1743	48	1043	174	104	771	35	519	71	105	7	1642	102	24	525	205	32	300	375	138	148	221	61	1749	419	298	329	210	403	23	222	176	430	388	434	14	116	718	49	94	145
877	2272	364	749	2160	484	2971	1911	932	4285	1232	3172	1304	853	4088	134	1153	539	6088	1075	845	871	2155	686	1898	1365	1690	1180	4159	3608	666	1138	3121	3528	1210	1232	599	897	230	688	1404	1655	1798	767	128	2018	825	588	438	231
1634	2522	1973	1887	3418	1431	2759	4828	1877	2819	2324	3707	3648	1925	1080	4637	1641	2819	4754	1687	10877	2248	4310	1694	2201	2649	2491	2497	3002	3180	2551	3496	4107	2428	1927	1657	2350	1072	437	1181	2084	2263	3214	1130	780	4727	962	3404	1289	1929
73	40	17	93	5320	81	549	47	127	52	1158	99	45629	41	32	208046	46	98	533	19	160472	72	18351	25121	107	772	60	2167	98	565812	140917	179247	196	227	67	79	102	96	43	26	5900	132	145	144	34	98	90	82	232	40
24	0	1	8	1208	0	8	94	25	395	0	56	74	4	25	2	356	2	7	0	6	54	25	143	158	0	461	232	11	117	496	5	1004	52	25	53	2	3	8	100	28	329	0	187	7	126	383	4	35	4
2554	514	286	1768	1745	466	2142	1453	2353	920	9234	2956	2872	986	217	221	10263	456	12244	78	1075	923	446	1176	2505	303	19987	2514	992	1171	2717	763	31503	2189	11975	9029	373	1326	1076	1022	2589	6242	640	1501	450	2606	112	946	1048	672
1776	2691	2518	2331	3243	2587	2519	4087	2992	7717	2748	5478	4680	2398	2360	5695	1748	4215	9665	3201	5624	2033	2620	2558	3006	2334	3992	2819	7739	5617	4999	2217	4782	4676	2357	1722	5281	1417	2146	2987	6307	2256	5835	4530	2314	4670	1568	5550	3504	479
0	0	0	0	0	0	1	0	2	0	2	0	1	0	1	1	0	14	0	0	5	0	1	0	0	0	2	0	1	0	0	0	9	2	5	0	0	1	1	0	0	0	0	1	0	0	0	0	0	1
774	127	8943	1327	4592	1663	1283	89	1114	3257	67	308	105	232	25	639	223	5065	241	11	46	3357	66	404	2338	29	782	33	4742	5667	127	82	227	72	793	248	118	276	5	17	139	355	5737	2279	7	3060	1291	369	141	481
559	2983	1481	486	2675	497	2499	5421	1275	3436	880	3024	5552	1064	1117	3577	1022	2681	4849	685	2477	746	4546	1863	806	1958	1873	5998	2705	7021	6268	11708	3433	2064	1820	1119	914	707	384	482	1482	2853	2658	2395	801	2205	804	676	624	317
4904	8001	3411	5512	10236	5086	4244	7202	5249	20125	6235	16180	10198	6324	4960	14379	4627	9620	12124	5690	10892	3472	9596	7238	5645	10314	9745	6522	17324	13278	6959	6823	12431	10136	6154	4773	6764	3749	1676	4581	4098	7452	17596	7784	2284	15936	4858	9722	5373	1774
171	488	107	179	464	117	579	513	337	469	192	804	360	195	218	514	204	274	992	501	509	191	400	337	239	462	276	236	545	610	926	255	692	456	258	254	318	113	148	181	221	584	427	392	146	821	173	373	104	244
999	2194	1026	1770	2718	1109	1269	2280	2747	2246	2213	4338	2043	1354	1455	1662	958	1260	6202	2407	3227	1083	1833	1757	1527	1396	2592	1815	4436	4148	3523	3373	2446	2083	1031	1003	2183	817	2570	1687	1473	1923	2605	1236	3004	2937	1036	1294	4034	914
255	162	25	175	421	72	292	123	326	577	221	373	778	194	375	47	174	339	229	349	761	336	22475	65	270	255	415	161	136	1790	167	523	430	289	137	278	359	258	112	133	539	506	190	845	23	532	86	283	121	376
5427	7921	3695	6720	9408	1449	5304	9960	10263	14496	12589	21366	14051	10703	8244	7265	7084	5052	19217	9456	6031	5750	7825	4672	8241	6402	24710	4752	16034	12633	11127	5211	15697	9504	6895	6823	7042	3546	2460	9426	7646	15428	19203	11420	2402	15155	1019	15737	10450	564
2019	5012	2463	2738	5049	2970	4861	10266	3513	4488	3826	9981	8752	3609	2077	8183	2211	5903	7570	3783	10379	2201	4734	3301	3553	2467	4044	4096	5218	9844	5453	5323	5704	7308	2801	2169	4243	1803	2501	2376	4251	3226	7033	4444	4202	6509	1619	4090	3933	1739
1540	4780	1713	2023	4690	1113	8995	5482	2831	8367	6345	5318	4246	1922	1324	6001	2732	5049	8333	2164	7608	2076	4192	2396	2926	4194	3690	2495	14270	8967	4588	2048	7887	3321	2640	2491	4312	2040	2282	1823	2511	2646	6471	2081	1991	9739	3216	1703	1681	4177
2398	2990	2331	3060	6221	2972	2069	4034	3987	5467	3181	5335	9122	2375	3558	3283	2375	3923	7244	2454	7030	2602	6260	2452	3648	4611	6049	2940	3450	8131	3315	4398	5529	4589	2519	2306	3463	1773	2551	2963	2796	3418	5852	3847	2205	7377	3798	3610	4898	1200
1587	2536	1635	2059	3905	995	2288	2589	3917	5046	3271	15184	4325	3093	4583	5545	2397	5973	8609	2911	4710	2168	2930	1508	3805	3352	9972	1905	8794	4332	4510	3120	5365	4548	2283	2208	3330	1511	1322	3064	3158	4711	3419	3369	1504	5568	1426	2944	2469	445
6386	3579	189	3128	6235	1023	5735	2082	4249	3909	1510	6189	1460	2603	378	4913	2376	24282	3551	1946	682	1321	44619	2358	6882	3521	4883	1508	1963	1537	1097	2298	4011	6579	1665	2375	3033	644	2357	2538	4503	3611	13619	1763	2093	18686	685	5868	3297	9490
2089	3146	1791	1548	4084	2857	4858	4538	2980	4915	3248	5803	4461	1200	1187	2706	2482	3486	4353	3311	4694	1702	2263	2139	2776	1586	2803	3003	2412	4582	3068	2394	8507	5059	2089	3419	2598	1548	843	875	3227	2615	3539	1136	775	3277	1031	1514	1091	3991
477	1153	563	464	1266	445	1103	806	821	1320	654	2163	1174	487	752	950	476	767	2376	847	1438	343	1714	498	653	534	1209	716	1571	1077	1970	859	1196	814	415	525	876	255	549	653	602	794	1684	677	825	1189	621	616	723	588
239	501	219	452	546	340	406	374	525	354	893	618	383	345	206	607	268	280	1045	606	933	236	507	184	274	629	728	288	373	944	340	149	944	1098	285	227	1374	128	688	453	262	193	1079	431	692	531	211	407	1375	133
788	967	692	1594	1668	1836	906	2993	2338	2838	2661	2761	2573	1531	1083	1620	1070	2607	6418	1280	2071	721	8756	612	1863	2423	3575	1262	1862	3974	2099	2857	2505	3006	919	1071	2797	573	2138	2312	1080	1374	3284	4082	4769	3092	858	810	10704	528
2697	3083	2453	3778	6496	5569	1811	6743	3949	10024	16915	7144	6864	4463	2653	2897	2422	11752	20718	1999	15308	2751	22980	1152	3847	9256	6836	3174	5842	16681	4430	9553	5585	8409	2722	2188	7002	2741	3948	3451	3288	3087	7765	9814	5565	6154	2375	3074	11450	877
15	126	62	20	96	30	65	85	71	219	65	44	1271	5267	16	23	36	4676	208	10	52	14	16197	37	18	12	54	22	52	15331	2037	84	120	687	58	35	41	15	68	23	94	60	39	193	67	10751	65	75	140	3713
1638	2155	280	1005	2318	414	1060	1244	1723	2186	513	2619	954	1619	523	985	681	1199	2371	1175	435	852	670	986	1343	1130	1309	807	1815	1527	1529	493	1374	1257	601	878	1288	405	335	672	850	1922	2101	1756	465	1985	328	2381	887	242
2324	1534	473	2999	3437	845	1208	362	4586	7676	3164	3535	974	4224	1088	910	2241	2595	4819	4257	4138	849	1055	479	2526	2072	3349	1250	2710	3254	1310	1992	5925	2922	1711	2318	2992	1702	4123	4589	1441	2570	6105	3947	1033	4440	944	1860	5560	541
736	1473	6328	1800	2153	1570	1174	1661	961	4551	794	2979	8392	1772	542	1499	932	10630	5932	866	1076	813	5939	774	1371	1853	1736	497	2225	4805	7666	3832	3222	2905	1069	863	2947	552	4982	1138	1045	895	2418	4684	8608	4555	601	961	3092	1329
1511	3227	874	1764	3800	1130	4807	5349	2520	6372	1640	9642	4153	1831	1282	3033	2223	3531	4701	1538	3403	1504	2726	2559	3372	2243	2955	3446	6885	3852	4163	2256	5945	3071	2198	2617	3377	1218	953	1271	1839	3448	4051	2140	811	6322	1475	3968	1203	3518
4895	9711	6459	11220	6179	7684	1483	5882	5821	5134	11449	16983	11722	10757	2277	5188	10655	20705	6636	4365	2367	5336	5376	6956	8382	6407	12602	12480	15639	16562	10075	4273	30686	16651	10083	11371	1151	6788	1185	3191	8774	8491	14871	4937	1195	12915	2012	11327	2723	885
70	269	154	167	117	416	114	341	190	566	3089	544	175	441	71	1325	17	695	3059	495	1703	135	485	114	164	666	43	78	345	830	223	436	47	691	15	25	862	142	1174	233	125	93	651	324	799	652	147	95	1100	225
705	955	807	944	2127	269	694	1452	2164	1528	646	4169	2492	834	1049	1098	1026	861	2128	1256	946	589	556	614	1034	1865	2975	944	1117	1975	1662	596	3272	1028	1402	944	1597	337	1539	2068	1320	1162	1481	1004	1095	1740	341	1525	998	246
574	1347	2453	989	1595	177	804	867	1662	2040	368	3894	503	543	802	128	1041	1597	1885	6156	3267	971	229	659	1143	2352	5069	478	829	508	1254	308	2544	2011	1065	964	3189	421	646	1061	755	1665	1047	1360	148	3544	401	3244	1690	719
282	472	367	400	972	297	638	746	1014	1410	616	1886	902	444	220	769	561	629	1947	593	2358	369	496	363	637	942	796	387	894	564	745	441	1787	845	730	353	1365	286	620	590	681	640	915	605	424	1079	408	748	887	313
1917	1905	1070	2156	3740	2489	4732	2459	1910	5929	3055	6043	4365	2019	1228	4088	1603	2828	3973	2298	6487	1592	2432	1769	2963	2742	2598	1602	5598	5854	2431	2525	4209	4279	1731	1727	1818	1423	966	1522	1941	1931	4611	1938	1000	3358	1509	1459	1468	1357
860	243	1919	603	678	169	943	187	1576	1898	18	9837	3295	255	144	302	2417	214	1421	622	417	462	37	3484	468	363	6574	903	295	416	407	298	5046	1039	2028	2102	284	267	177	4489	861	2912	575	1306	81	1266	89	10631	400	112
826	1207	587	734	2548	233	901	1273	2976	4144	438	1973	1687	2933	606	1261	756	2281	6120	1768	1155	632	871	752	956	1352	3527	752	2149	1800	1214	640	3531	991	1034	1177	3832	337	1963	1777	936	2416	2841	2282	1161	3007	394	1613	2257	261
3064	8441	997	4721	13889	1803	2199	1553	6904	19382	2067	6975	5506	8691	4943	1335	2868	7663	47053	7824	1744	1031	15653	1694	5930	5122	8910	1243	4000	11187	2767	4625	5496	7057	2796	2561	5057	1979	3462	2469	4667	9923	9011	9794	1832	12690	1589	4096	8248	817
988	2103	1524	1195	1684	994	1208	1250	2575	2466	1505	3795	2200	1940	1442	2054	1267	1179	12756	3594	3129	898	1599	1239	1310	2887	3225	1243	2683	1406	2431	643	3311	3413	1357	1221	2801	661	1814	1841	1949	2327	1988	3711	1255	2787	361	1872	3055	122
990	2228	831	1046	2561	1586	860	2191	1312	3270	5106	4059	4071	3592	509	3617	1276	2563	11614	1369	3886	1416	2042	1168	1512	5789	2535	1034	3822	4877	4121	1856	3514	1900	1906	728	1737	1042	1188	1233	1083	1622	4359	2788	918	2584	731	3647	3340	194
2781	4013	3129	3016	9622	3584	3354	5278	4614	15551	3368	11126	8095	2099	1820	6996	3360	5920	11216	4561	8923	5056	4657	3550	5385	6266	4857	3928	7742	6594	4365	3383	9339	9872	4510	3636	5892	2928	1284	2140	4213	3814	4935	3695	1117	6847	2291	5627	1864	2273
2153	2388	1457	2596	4550	2242	4435	3828	2813	7913	3468	9883	6341	2675	1488	7169	2403	5045	10778	3579	5037	2485	4115	3372	5059	5576	3868	4614	8141	13032	4071	3833	6493	6678	2912	2390	5077	2296	818	1612	3474	3491	6037	2690	1203	7837	1797	3952	2268	2330
17297	7578	3973	27667	25228	16105	17926	6869	25293	23318	94961	25986	16860	9738	6421	2916	20663	16477	18698	23546	11817	14383	8364	12840	28712	10767	93293	17926	23969	13308	18798	15127	51147	51113	28814	25070	13352	20540	14640	10974	10135	25825	22738	25390	5376	27716	5536	14128	19973	5224
5	56	28	20	50	17	182	53	71	323	12	376	14	97	114	488	26	78	132	96	85	16	107	95	30	126	36	57	427	150	236	24	117	78	60	45	286	14	3	39	45	298	57	115	14	111	21	228	6	98
961	668	102	1726	1204	722	759	674	2775	2733	887	2076	738	1056	120	227	817	1127	15560	693	727	862	537	397	1527	2462	3537	777	743	647	607	496	3276	1695	1731	1016	926	516	986	1831	621	1093	2831	424	1261	4873	226	1278	2740	2530
1067	976	330	1181	1810	268	1155	976	1449	3929	531	2787	1790	1293	1267	1917	741	1257	1328	1968	662	637	749	716	1439	2120	1703	524	1233	1249	1366	969	1783	1355	678	877	1450	582	994	704	1218	2195	1669	1886	758	1821	464	1987	1805	900
16937	17712	680	15602	18143	36430	9223	3765	27139	24550	39257	28976	10790	10312	1173	19158	17398	41888	148822	8093	4699	8447	6036	9757	17573	22154	50994	6763	16208	10749	6426	10030	24500	26131	16794	18028	12724	7959	10991	9231	7062	20734	7461	10497	4297	26755	3866	19973	30125	10782
6	27	3	28	11	18	10	2	3	40	3593	11	9	13	0	2	9	222	4	17	6	11	12	4	1	3	8	3	16	32	17	5	39	15	23	11	5	2	6	1	2	7	3	8	0	4	0	3	4	0
230	160	485	285	784	274	614	113	615	663	1356	405	381	242	726	174	699	455	1327	212	311	387	1303	111	387	265	1684	363	445	1039	440	293	1655	843	1160	759	530	351	178	93	272	1279	193	708	66	560	161	402	434	520
2144	3547	249	1027	7202	645	1096	643	8674	4843	687	3222	560	2132	272	182	566	4037	3994	762	366	702	1098	1280	2234	2369	689	1861	432	1174	418	1791	1432	4778	833	1226	4035	850	7923	931	1735	3393	4491	1322	1098	11556	2446	193	5547	1237
1751	2677	600	1171	3863	1077	2590	2221	6074	9228	1124	6353	1642	1574	1207	1695	2560	2603	5596	1843	1323	1117	1841	2049	3292	2345	3741	1458	2598	2574	2454	1105	7697	3940	1901	3127	6055	809	3134	1756	2249	4174	3518	1905	1067	10289	1663	1636	2257	3089
348	969	347	395	1724	517	1003	993	809	783	1221	1164	2051	423	527	1190	740	1294	1090	501	753	673	900	327	882	315	1248	945	808	1571	929	1176	2381	967	1290	450	876	457	440	388	730	797	957	604	426	917	635	411	1080	185
2032	1443	424	1472	2302	647	2681	2018	1331	1954	465	2439	1512	1852	530	1482	1704	1245	1203	2364	1087	884	1242	1085	1754	1544	2431	1016	996	1679	1677	770	4424	2373	1519	1958	1874	778	534	631	1070	1734	1734	1416	421	3273	507	1265	1010	1905
2	5	1	0	8	11	3	0	3	12	1	8	1	6	0	1	0	9	10	1	24	2	6	0	6	3	2	0	17	2	0	6	2	28	3	2	4	31	0	1	2	5	0	9	2	4	1	2	0	3
5235	2236	1613	6029	6587	3986	5278	3426	12564	8202	2511	23358	8014	3817	2348	4122	6254	9327	34853	4558	3734	2790	9790	2172	7133	7683	20048	4230	4528	7699	4820	2779	13187	10061	3285	5748	3451	1641	7964	11509	7025	5519	8507	3456	9235	16095	1071	5783	11653	2468
771	1068	921	888	1260	289	1212	1392	1566	3922	1734	2158	2005	1716	1517	3143	630	935	2300	1516	1470	1183	1080	1253	1632	1298	1490	936	2191	2680	2082	705	1571	3424	847	560	1094	757	952	1126	1133	1641	2467	2451	827	1754	415	2301	1536	192
297	343	51	416	675	85	140	48	503	803	50	506	118	624	89	88	156	656	574	215	194	71	454	145	400	332	313	95	98	529	164	189	182	302	85	250	331	187	224	157	237	331	991	396	117	638	118	231	419	82
379	710	364	415	792	376	920	1009	847	1846	458	1203	836	513	122	1720	359	1892	1881	502	1294	309	1081	486	609	682	959	388	910	944	639	551	773	1516	412	393	652	343	537	436	467	467	1193	297	573	1487	269	468	1530	676
4926	2104	517	4444	5887	708	1967	1847	4556	7435	1483	5054	2643	3851	3018	2038	3030	5709	4292	2330	2664	1406	1899	1503	4141	5121	7334	6738	1356	3494	1650	2168	6864	3026	2377	3930	3709	2039	1099	1642	2777	5001	4034	3466	620	6876	452	3296	3127	524
2069	2943	2744	2813	2861	1775	5144	3445	6222	10869	2737	10030	4267	4024	1233	5265	1910	10311	7095	2794	6121	2226	3332	4967	2688	5651	3619	2929	5226	14779	4172	2049	5302	7158	2297	2035	4566	2279	2861	3209	1913	2624	9714	1934	2310	8273	2128	2184	5270	3061
2448	1018	270	479	1402	735	255	109	934	1447	353	1313	213	508	220	190	401	733	529	232	215	379	325	339	853	580	219	432	423	229	123	316	1172	1166	332	496	588	327	178	158	334	558	1193	548	258	1427	877	194	351	198
1134	1698	1082	1795	2075	1670	1683	2199	1213	5044	2231	4185	2678	2738	1063	3633	1184	1452	2520	2148	5221	1383	3583	2857	1895	1551	2088	1627	6381	4171	2950	1369	3007	2216	1255	1019	5307	932	2855	1049	1414	2559	3394	2925	1527	4655	1006	1833	909	1149
3538	5222	2882	3288	6321	2526	3616	7219	6969	9625	4590	7743	4331	3973	3712	7434	5705	4293	6941	3324	7882	3769	4888	5061	5439	3648	9626	4771	7309	6321	5446	5574	15047	6435	6116	6121	4560	2208	2140	2947	5549	7115	5896	5697	2551	6886	2188	7955	3935	1994
344	288	277	338	816	296	356	323	1043	943	584	777	604	337	398	534	327	532	1732	430	664	308	362	135	445	519	839	284	658	572	367	358	1044	584	401	293	935	200	1229	554	418	397	499	446	725	834	202	352	1112	178
392	112	257	474	1009	3339	518	466	971	1213	14302	764	941	956	170	2552	208	6908	14263	278	937	456	6102	507	1021	2579	388	637	633	3214	477	468	299	2557	454	313	1971	523	2993	226	1093	329	669	443	1577	1154	225	152	9651	638
3455	3735	2632	3635	9055	3619	6034	6223	4662	9978	4017	13640	8994	3837	3437	5097	3471	6079	8851	3250	8987	3634	5319	3540	5560	6346	5820	4628	8833	11428	5482	4987	10174	8295	4374	3873	6317	2410	1559	2734	4828	4513	8121	3852	1337	8273	2642	4807	1920	5353
2416	5503	3042	3762	5987	3374	7892	8010	6931	5847	3969	7789	6482	3352	1895	5613	2520	4134	7094	4721	6430	3343	5765	2895	2789	2347	4613	4156	5170	11883	6312	3090	6901	7610	3319	2753	7559	2649	2579	3163	3695	3564	7097	2529	3201	9650	2526	5692	6548	2642
88	33	7	34	92	133	122	87	44	68	1055	121	238	73	8	11	30	47	2113	22	172	36	87	52	49	24	64	76	42	120	38	33	80	50	42	36	66	15	70	47	34	100	37	301	3	61	19	22	195	23
1	6	0	248	0	12	83	58	11	407	18	12	23	2	6	1	8	8	8	48	37	22	64	15	122	2	2	12	217	20	223	9	15	1388	4	1	0	1395	2	89	18	3	38	21	299	9	0	47	61	1
205	370	241	197	577	274	284	262	878	500	158	1012	1088	328	852	374	194	459	1027	320	476	229	416	367	322	497	590	366	543	920	623	528	438	556	226	194	423	141	648	322	538	344	642	473	534	720	210	445	465	161
1082	1298	1242	1088	2062	701	2026	2935	1316	4254	2705	3854	2180	1402	808	1724	1385	1953	2946	803	3149	1241	909	916	1589	1747	2066	1253	1646	1248	2466	812	2945	2340	1353	1395	2309	1002	769	944	1672	1609	1308	728	534	2819	607	1176	915	1308
4365	3452	10716	21468	17415	4168	3587	30792	3752	36193	3621	36222	19668	5743	7770	46333	1020	5706	39122	18076	194739	1956	16254	5143	10537	2143	1602	16132	20247	48599	23776	9964	4827	8546	2236	827	77818	7742	2390	7312	18109	6682	57684	21568	5291	34802	21193	19449	4066	2385
1701	4119	3185	1724	3214	1837	3199	3781	4177	5818	5380	8110	3245	1966	1012	6293	1585	4407	7031	2255	9548	2568	2226	1828	2525	2631	2990	1778	7047	3461	1933	2982	3963	4318	1849	1771	6362	1545	2335	2709	2380	2418	3982	2110	1729	5116	1574	3380	2266	1966
501	2238	414	1101	1402	500	677	1559	1815	3100	692	3288	1360	1013	521	1057	497	2623	2433	757	2275	917	792	822	1349	1038	2108	956	1905	2196	1102	828	859	1828	460	494	1209	564	1185	821	1007	1145	3273	853	686	2324	445	3004	4094	121
400	12	7	14	87	6	198	12	82	49	84	150	37	13	1	12	100	4	52	7	7	24	3	39	32	3	172	65	6	6	19	3	205	31	88	136	21	4	23	28	56	129	1	18	0	23	0	16	11	81
668	113	352	909	1324	627	3184	1464	1109	1339	88	1641	1150	503	260	1350	474	665	671	805	610	848	968	1045	813	547	1051	678	1004	2411	721	757	1689	1668	670	592	1141	378	324	589	625	1001	1831	504	472	1883	392	551	400	3101
19912	18639	19765	27058	33714	5329	14297	26002	33492	75728	24595	65577	67393	28464	26950	44089	23629	29574	64658	66249	15075	17835	24200	10433	41589	20616	135398	19421	35066	44287	40995	20132	51864	43177	18851	28393	22338	13383	7014	18309	28868	50807	33039	39437	8142	56178	4473	75655	29378	1348
744	1572	343	663	1539	489	1456	1390	1755	4415	524	1711	1201	554	475	969	955	687	1336	737	1713	586	380	883	844	1341	1729	906	1431	915	1005	849	2810	2231	1302	1361	1431	564	406	640	1328	1340	751	937	363	1527	641	1462	419	1357
2348	4730	1561	1872	2203	1419	2669	839	2576	3860	1552	4147	3723	1269	295	265	4752	1629	1812	763	804	845	698	2460	3135	1460	6346	1920	1869	1247	2200	1315	11022	3263	2481	4809	742	1483	410	1727	1487	3160	1298	1725	331	4413	233	4005	1191	1756
177	102	299	271	307	211	233	292	698	437	829	903	298	230	103	453	157	345	1397	375	793	105	314	131	247	426	505	168	708	451	420	208	429	522	122	114	597	100	1015	283	248	203	990	213	721	567	139	114	915	145
4133	8382	3832	5136	6666	5134	4940	5394	5969	17133	6199	13745	9614	6364	5128	8778	3504	4712	20235	5685	9250	5634	4000	4331	6102	6014	8818	3321	17490	5204	5855	3417	8999	12765	4571	3684	3074	2996	5303	5878	3719	4834	9802	9579	5757	14328	1898	7253	9153	1173
1701	2316	860	1735	3344	724	1497	2308	2607	4603	2879	6163	3703	2585	2346	3336	1790	2501	11027	1846	7668	2186	2732	1524	2303	1720	3715	2039	4721	6213	2768	1084	5123	3197	2263	1847	2052	1084	678	1162	2033	2879	3909	3681	623	3631	745	2060	1500	554
835	1811	592	808	1654	507	2866	2307	1145	1836	767	2971	1132	525	518	1157	1363	1119	1214	973	1379	755	822	2058	842	855	1767	1362	928	2833	1432	503	3279	2267	1048	1156	3218	508	446	705	832	1377	1653	869	464	2165	684	1819	374	1523
610	1343	797	964	1609	420	835	1600	1214	2107	886	4328	2898	1461	1066	2569	504	2035	5423	1459	2606	639	2440	869	869	1271	1604	1722	1369	1721	1551	835	1412	1407	713	463	1322	557	806	1012	1077	1095	3124	1433	2009	2298	462	1478	3101	324
1959	3602	1021	2436	3438	661	1445	2361	3363	5528	4919	10246	3550	3760	1742	4613	4741	2419	7458	1964	7845	2627	2969	638	2801	2111	20232	2507	4982	6408	4627	1421	9335	3546	3276	4349	1807	1373	844	2056	1553	9628	4569	5050	973	5959	428	4544	2579	265
253	591	510	326	1151	296	894	1363	533	720	367	1325	1642	284	322	416	938	593	1055	291	920	336	435	281	430	329	1001	639	558	961	901	449	3221	891	1289	613	631	336	293	309	722	735	751	587	377	612	237	423	463	330
532	886	597	1146	1209	435	1306	1834	1038	2258	994	3046	2273	983	726	2220	391	949	2783	697	1241	838	1471	669	1337	1021	1035	940	1677	1858	1644	941	1089	1858	611	395	883	547	427	1392	900	1095	1599	1324	528	1544	234	2752	985	111
587	1278	1167	830	1473	741	1219	1270	1170	3334	985	2926	1217	1374	776	2830	813	2192	3099	1153	2559	584	2174	909	734	2341	1437	1042	2024	2250	1154	973	2166	1634	883	891	2434	438	560	750	626	1533	2933	902	830	2992	1154	1449	1396	897
511	834	732	757	1075	583	436	390	610	1470	1468	1380	1425	773	575	1953	337	862	3631	956	1153	768	1096	376	707	1229	730	644	1315	863	1322	699	873	955	463	356	744	363	400	391	343	653	1776	1604	778	1501	440	682	1085	153
2334	2886	866	4519	4983	1659	2785	3141	2868	12196	6031	6436	10644	5005	3326	5617	1343	3624	9416	2817	3590	4391	5507	2816	4983	4243	3021	3078	5614	6895	5286	4509	3055	7350	1694	1298	3655	3335	1686	1750	3034	3374	5196	7173	2314	6754	813	5499	4077	594
22	31	10	13	31	34	48	18	30	52	80	133	22	12	15	28	11	30	40	14	59	15	33	28	24	23	22	41	63	15	18	18	70	24	24	22	33	15	11	13	15	41	26	38	14	52	40	35	9	107
2383	2916	906	3965	3795	1968	2037	939	6271	3391	9146	4438	3509	3035	2304	2348	654	1836	7628	3483	1628	1264	859	2370	1995	2181	1731	3900	2008	2756	1446	1476	1432	5958	984	725	4389	1455	1934	2885	3479	1593	4826	716	1864	6284	2818	2364	7335	1906
1096	2747	1089	1808	2210	2065	3224	2689	2069	4474	2871	3161	2731	1704	989	7256	1217	3829	5295	2805	3534	1566	3019	852	2024	4767	2021	1253	2048	3828	2330	1809	2768	4133	1297	1357	3745	1033	1246	1660	1737	1909	3196	1250	1709	4429	1262	1340	3416	4400
1204	1212	3518	1645	1764	427	1965	4933	1494	2612	1500	3259	2908	2074	1474	1781	2599	1407	2314	721	2004	1134	1849	2219	1674	2604	4429	1798	3689	3560	2259	2193	6638	2024	1640	2622	1041	1476	377	859	1043	3073	2638	2090	449	4121	2982	2398	700	1078
1562	4711	3805	2815	2753	1247	1852	2514	2886	5868	1622	10818	5222	3017	1635	5245	2448	2776	5749	1919	2833	2201	2068	2098	2830	3621	6147	1816	7643	2963	3921	1366	5916	5842	2480	2383	2752	1279	349	1408	2252	5419	2395	5596	510	6936	767	9078	901	1982
1272	1222	1024	1093	2199	768	1608	2542	2253	3508	1626	3154	2005	1265	662	2218	1687	1487	2216	1170	2372	762	1995	1452	1889	1182	2344	1363	2046	2142	1263	1428	4287	1884	1821	2137	1225	670	522	891	1336	1910	2180	1061	544	2754	512	1766	1057	1965
746	2299	470	1173	1228	576	3076	373	1717	2147	3551	1728	754	708	286	1496	394	1667	2434	1024	2166	1740	403	770	905	716	909	509	1984	1555	733	840	1184	2430	606	939	1525	821	877	579	676	893	1363	361	605	1191	582	378	955	2353
905	168	34	286	2933	220	1332	140	1082	2488	1211	3075	210	177	448	41	125	259	189	222	4368	750	583	823	1470	171	203	243	8813	1456	3376	801	297	1127	158	184	173	463	172	970	181	348	5392	455	299	304	132	267	218	123
2038	3928	1771	2258	5107	2240	1479	3578	3142	6986	1992	5508	4122	2909	2336	3402	2172	2996	2920	1266	6509	3408	3763	1335	2869	1366	9236	2896	9731	7417	2839	3642	4558	4042	2494	1691	1563	1565	651	1328	3549	3362	5073	3040	491	4214	688	4523	1484	287
17	258	3	48	1402	282	836	4	386	146	4	95	502	27	4	2	1941	3	21	3	8	19	31	8	15	25	2138	107	12	898	43	15	8702	70	4088	880	5	18	42	74	770	512	14	236	20	52	9	12	254	7
30712	26217	26635	57373	57357	31618	24460	32575	90214	127891	155152	79589	75555	47403	44936	123927	20970	69945	186716	83710	64777	27118	51535	48289	58900	52680	83150	59641	87713	121425	104422	44090	53584	87222	21469	21047	18154	21800	153660	59883	36750	43259	163590	73672	56550	114983	40396	30696	285629	6132
185	278	281	231	385	183	461	213	460	579	238	664	331	203	81	297	228	292	708	280	257	166	167	180	385	244	510	244	472	532	322	304	591	474	254	218	659	116	242	277	270	287	308	369	271	591	162	513	312	290
2838	3013	861	7854	3212	1433	10657	4044	4360	5962	2179	12994	3506	4445	1499	3871	2651	5976	3563	1311	3553	2087	4107	2271	2692	7192	3523	3259	6702	8734	3203	2003	6360	4652	2195	2613	3108	2569	1917	3970	4489	3221	10277	3462	2129	14441	3051	1606	3017	6213
282	289	290	240	615	268	624	401	985	1172	230	1479	872	433	332	601	423	575	3142	475	615	235	443	238	373	1586	1000	306	629	915	635	212	1072	688	449	353	807	200	1028	940	567	460	559	336	789	789	166	552	841	263
1978	3299	2808	2465	4121	1206	1953	6262	6563	3669	3151	6361	4580	2237	1988	4876	2799	2919	5627	4099	3725	1725	3823	2727	4075	2107	8402	2585	11201	4538	5154	2546	7254	5119	2870	2425	3732	2485	5653	9519	4136	3474	3563	4975	4603	7183	1353	5031	6760	770
5	1	0	8	4	0	36	17	5	13	0	4	13	0	0	0	52	4	6	0	1	9	0	1	9	2	194	9	0	7	10	0	211	2	616	158	1	5	2	1	10	17	0	12	4	10	0	2	4	1
553	4283	2245	2680	3585	361	3118	9263	4503	3565	206	6042	7871	1646	1781	7466	1488	3025	4516	3126	4588	2092	4813	3809	3232	1698	2508	2710	3291	2957	4764	1097	3537	3782	1574	1789	2767	476	1094	2229	2936	2444	6672	2075	6222	4940	1773	2602	1031	2007
639	1918	1294	1057	2139	693	910	1459	1723	3242	2281	2400	2024	1711	1395	6163	607	4062	3893	1190	7451	1679	1853	1387	1419	2266	1370	1189	2324	2985	2297	1959	1488	1811	899	648	3192	1081	1731	930	1169	1815	2686	2371	1942	3018	1681	1527	3680	697
4179	5401	1576	10646	7672	7878	8270	8546	4555	10958	29471	11122	9258	4405	1139	5668	6632	7188	21107	2928	6822	3350	6947	4676	9115	20690	7165	11105	11000	8669	7127	7105	15388	18951	6344	6934	5017	9432	2098	3283	4677	4982	10091	2741	1359	10745	1577	12786	7282	4119
114	233	170	123	127	251	80	127	230	502	762	234	225	522	49	638	19	620	1144	436	1885	89	206	158	129	318	45	48	230	686	176	102	23	404	21	12	941	126	572	154	83	45	224	257	480	629	293	146	1641	151
260	1386	1521	356	966	138	1261	767	1100	1305	71	1311	1867	943	1469	931	2967	500	620	418	859	321	215	5760	656	225	2361	392	1480	333	1351	102	7274	485	1758	2674	1180	245	224	710	574	2011	638	3095	431	1080	303	1931	196	586
1210	2799	453	1225	1905	728	1725	2386	2571	3718	3708	4035	1827	1284	832	1437	1001	2033	7297	1009	3771	1251	2098	783	1228	1868	2991	1287	3082	4016	1657	1211	2170	2743	974	1193	2252	934	1137	1006	1204	1754	2833	1608	937	4026	1486	1180	1612	1251
2047	3323	1862	3568	5087	2614	3509	7495	2184	6870	3003	13747	4657	2218	1331	2543	1387	2738	8228	3083	5122	2275	5572	2291	2451	1949	2974	2846	7152	5265	4667	4920	4031	6020	1575	1381	3130	1149	1871	3132	1930	2211	9694	1557	3688	6290	1484	2218	2999	2186
339	86	13	24	146	18	215	27	339	94	12	248	71	40	24	16	41	121	173	58	17	47	24	40	103	27	44	38	23	69	24	51	150	61	52	24	120	13	128	94	60	145	209	143	41	233	132	21	198	80
7247	4752	1983	16302	8098	22569	3784	9107	12294	17840	33381	16151	12145	3650	1827	1270	9975	17372	25115	11632	6644	4275	9980	4210	18161	11243	23601	13575	38442	13764	11162	10159	27455	52634	12572	12807	5394	24285	4409	4124	8912	11077	18793	6565	2728	18298	2798	11296	10531	3035
1519	3170	880	1454	3329	1681	2490	3822	1540	4665	3635	9883	3886	2044	976	5710	1974	5467	4264	3769	8811	1829	2789	2063	2629	4677	2516	1672	6756	4551	3506	3333	5280	4453	2507	2152	2768	1252	814	1423	2192	2683	3236	2314	858	5527	1374	1237	1310	2036
935	2088	1601	1995	2249	1374	2611	1450	2569	2444	2397	3068	2178	1116	476	2743	1200	2588	6736	1343	2343	1389	1771	1255	2236	2452	2766	1347	3036	2654	1704	2506	2894	3915	1095	1250	1032	833	2911	2195	1006	1652	2866	1176	2810	5308	749	1159	2596	2503
1948	2755	2494	1776	3085	2073	2672	4479	1916	3568	2524	6762	3881	2097	838	3606	1677	7024	4080	1774	4102	2009	2327	2021	2397	2186	3166	2517	3254	6655	3103	2624	4119	4987	1619	1710	2566	1304	1088	1555	2388	1705	5652	2100	1990	4053	771	2058	1806	1835
49	26	108	102	62	32	38	30	121	115	18	74	264	72	64	29	250	10	37	29	13	132	147	19	32	32	165	85	32	158	96	35	524	28	215	104	11	9	42	190	42	308	27	213	21	138	25	203	168	17
26	2	1	0	1	0	14	7	9	1	0	16	8	2	0	0	46	0	1	0	0	2	0	2	4	0	80	2	1	1	4	0	52	0	36	16	2	0	0	4	2	12	0	3	4	7	0	2	4	1
19	12	24	21	37	10	101	55	42	98	24	138	22	9	30	11	24	17	31	68	27	13	73	42	60	25	28	29	94	44	77	36	98	45	44	30	26	32	15	16	33	88	119	48	13	61	9	179	19	61
964	2742	810	1046	2869	1282	2762	2511	1656	3742	12187	4628	2482	1369	828	1878	861	1828	5018	1168	2716	1269	1737	1394	1448	1896	1404	880	2825	1791	1562	1955	2607	3518	1126	1167	1509	835	2006	1262	974	1394	1723	1545	1734	3558	559	1217	1550	2078
16	8	0	3	6	1	14	0	17	55	0	51	0	22	1	0	7	5	10	1	2	4	0	3	11	1	2	1	1	0	1	4	12	0	1	2	18	2	0	9	3	6	9	4	0	11	6	1	5	1
125	131	40	151	293	23	210	43	207	163	30	504	267	30	18	37	458	57	177	114	110	54	292	10	154	49	738	109	67	145	39	16	2229	383	941	216	275	266	29	81	212	213	268	292	20	131	20	337	25	35
9	2	2	5	0	0	16	2	44	31	0	6	27	2	3	1	3	3	10	0	18	3	1	49	15	2	8	2	31	2	14	0	92	61	12	2	0	0	2	30	19	9	0	10	0	6	0	4	9	3
258	859	827	377	542	225	229	606	665	1623	356	1870	643	788	629	2677	462	844	1404	610	970	339	373	325	691	921	644	319	1985	573	1534	231	1730	1173	619	540	1051	317	241	344	469	1268	1215	1024	223	724	457	1560	523	197
343	522	292	557	830	338	319	831	1231	1510	829	1402	1271	631	515	1249	276	632	2373	877	2070	430	857	586	565	733	1063	573	1290	1427	1565	314	687	1516	351	248	414	242	929	1312	508	546	1114	1224	920	1156	407	949	2312	87
835	515	429	1184	1146	261	1279	516	429	1427	691	1321	1408	908	666	361	1295	958	865	138	642	445	2123	445	892	685	1134	1269	801	1529	1966	979	5170	897	1020	1831	386	946	150	92	541	1693	1785	977	114	1249	84	287	419	175
1974	2741	2553	2687	3527	4183	3217	5302	1491	9094	3105	5903	4117	4485	1693	9440	1393	6762	8142	4091	8235	2304	7773	2748	3743	9994	2482	2879	9156	6193	5918	5134	3461	5730	1569	1535	8098	1860	2130	1479	2313	2665	4693	3320	3209	9849	1927	3109	1404	2517
901	989	647	991	1802	735	1625	1139	1607	3549	1451	2679	1984	829	822	2225	938	1354	1947	1928	1770	771	1220	1255	1813	1230	2296	1077	2824	3155	1182	1263	2783	2612	1272	1093	1965	860	525	633	1190	1719	2667	1618	519	2402	765	1095	971	806
541	712	336	814	1268	648	1760	1171	1130	2069	1114	1703	1544	621	121	725	454	1032	1421	437	2472	580	814	414	948	654	709	684	883	1196	618	842	1192	2873	638	568	765	709	397	708	982	466	884	298	395	1431	233	791	925	545
136	339	101	98	448	114	425	332	730	552	195	908	328	514	200	777	189	440	1382	273	404	269	374	224	217	202	414	174	736	607	362	303	672	303	284	353	321	125	123	408	180	771	359	497	265	695	77	403	240	104
348	509	397	564	657	500	367	515	627	4277	1307	1068	595	772	699	2436	188	1028	3244	523	870	494	907	397	1291	1457	640	340	1929	1081	912	797	365	993	304	164	501	378	572	1354	1209	538	1403	7893	399	1783	540	1633	1381	117
36	4	9	36	15	54	91	0	10	119	321	105	2	16	2	2	2	62	90	41	107	0	1	0	40	5	1	8	27	87	15	140	8	178	18	2	88	98	5	21	0	59	143	21	3	31	254	15	24	4
916	1346	1989	1451	2698	512	1086	2610	2121	5748	750	3884	12110	1163	2725	2315	480	523	7869	1621	3226	713	1023	1078	757	1412	1819	742	2443	6078	3821	2591	1163	1855	609	506	889	747	916	1721	2109	1650	1901	1489	1321	2648	1184	1983	2076	353
1347	5948	745	1392	3646	1046	1781	5817	2186	3726	1788	8918	5003	1889	1335	4924	1524	3321	5487	1756	4000	1249	1157	2711	2672	1956	2670	2077	5773	9618	4745	3715	3170	2910	1367	1398	3616	936	1320	2773	3626	2167	3834	1472	1798	4058	2282	1042	3510	1487
1986	2907	803	1475	4199	1836	4498	6166	1286	5099	2731	6432	3378	1583	690	6940	2053	4703	2610	1212	3900	2026	3468	2948	2620	2412	1870	2485	6052	5656	4325	2669	6082	5350	2433	2585	1632	1519	336	934	2017	2743	3820	1355	344	4398	1869	2410	472	4711
3060	3711	993	3149	5983	2160	3111	6553	9259	8538	5606	9615	5771	2287	1476	3023	3134	4700	9320	3196	3047	2129	3003	2559	5007	4084	7370	3314	3976	4835	3364	2418	7598	13837	3461	3230	4022	1377	4409	7733	3683	4216	4998	2410	3599	7193	1867	3746	8013	1494
208	56	36	174	225	289	309	75	99	125	41	152	301	78	31	32	165	584	111	90	313	55	63	104	297	53	139	154	139	82	268	100	920	193	346	329	56	305	65	81	113	177	44	80	24	226	18	17	85	200
964	1615	747	785	1828	457	1682	2694	951	4408	1977	3338	3326	2274	855	4028	996	2566	2879	1207	2675	888	2527	1939	2044	1464	1597	1348	5775	3358	3028	1051	2922	2969	1215	1041	2921	1244	215	744	1616	2030	2099	2034	278	2591	300	4025	489	238
2381	4853	2503	6704	4562	5207	11551	8012	2131	16411	10079	10593	5799	9844	1535	10071	2249	25018	13909	4678	8515	2480	9573	5365	5574	13266	3429	3941	12617	7923	6713	3117	5954	12464	3056	3279	7492	4865	1683	1303	2635	5846	7435	3248	2034	12469	2963	5777	1231	8364
4371	6872	2150	25856	6660	23514	19482	2177	6450	23282	2227	8703	22896	2142	1726	1682	1714	18366	11389	3157	14442	1278	3254	3284	15316	7997	3194	10463	16881	12990	3538	23619	1738	80595	4423	1633	4363	49403	3844	1836	2193	1562	11631	2219	1888	12420	6106	6897	5797	8104
1265	1781	1129	1283	2390	910	2016	3246	1467	3723	1567	5485	2915	1614	1472	3619	1301	1279	2606	1356	2306	1043	2895	1412	2647	3288	2109	1722	6199	3580	3749	1440	3523	3739	2598	1736	1810	949	223	1041	2242	2665	3553	2143	317	3097	535	5242	699	1002
1716	1129	264	5726	1652	1080	3098	1384	12276	7225	3031	4154	1789	1304	370	295	8593	2493	5796	4361	1571	1515	742	511	3778	3648	76342	2246	1993	2142	2791	1071	10766	5538	1978	6105	1787	1789	6749	9510	2236	8269	5317	2358	4078	10712	93	1863	24856	2510
7042	19904	11141	17380	17899	7501	24892	39731	7806	54425	28	74263	25500	18212	9590	44556	6448	33634	28068	8253	11420	15118	15030	15757	21769	17529	7620	16427	71284	31759	17394	14770	17001	49341	12051	8164	22197	19312	1486	9617	10546	9723	28681	14723	2667	34992	8697	29036	12170	4714
1988	3095	752	1779	4203	1371	3348	5414	2525	5098	3303	5138	5294	2232	1017	3683	1484	3460	5878	1553	7609	2247	3291	1524	2681	2718	2590	2703	3125	3622	2356	1586	3885	3746	1911	1553	4668	1084	1171	1767	2171	1972	4852	2227	1124	6974	1333	3487	2199	2251
338	1486	133	790	4318	225	8961	1758	469	2493	23	2254	4872	851	965	1279	2532	3727	817	649	1399	924	916	2108	1659	627	1030	433	3041	1425	2106	552	14090	1076	4959	1352	5185	672	338	118	1155	2130	2628	1331	764	1965	1132	1526	91	3040
843	1735	437	1065	2153	614	2424	1901	1578	3874	1161	3844	2423	752	587	1706	1091	2345	2177	692	3559	1063	1043	574	1164	1253	2098	1177	1340	1924	1340	920	2941	3081	1126	1269	2809	882	799	1338	1433	1589	1824	781	758	3729	743	1552	969	3457
1495	600	344	1458	1789	706	556	859	1895	4447	2926	1826	2764	1379	1971	3011	2461	2337	3188	1807	980	661	3794	1024	1404	993	5072	1849	3886	3907	1393	836	8078	3302	2057	2695	1721	1778	642	1061	2144	3542	1834	3028	228	2172	258	1892	813	187
76	26	5	43	1934	7	978	11	145	217	46	117	763	25	35	32	1372	3	48	1	44	39	9	564	56	14	710	99	6	154	110	11	6189	93	3452	839	8	3	5	104	439	290	2	132	1	42	16	76	10	9
4617	7307	3230	11140	4621	12101	9622	6945	4896	11993	5677	12174	7851	2408	1368	12022	2510	23740	9958	3947	11776	3335	10643	7523	8854	2196	2922	4220	21768	4099	4891	4167	5276	16500	3451	2824	13643	4695	2219	4995	2351	3089	8090	1876	7385	17158	4115	7155	3594	7659
8	7	19	6	27	13	23	36	20	146	15	17	22	89	5	17	4	12	32	26	4	28	42	22	124	9	9	24	13	11	0	8	24	31	16	8	14	11	15	10	10	10	15	27	6	11	9	8	48	6
688	1457	1550	829	1774	429	1007	1154	1255	2016	949	1511	1219	2339	2196	2634	732	2070	3433	1530	2372	925	3412	574	872	1305	1640	916	2120	2088	1915	717	2412	1714	1112	629	1401	620	1056	601	1047	2029	2581	2054	1048	1797	401	870	1295	226
0	1	0	0	0	4	0	0	0	3	0	1	0	6	0	2	0	4	3	0	0	0	14	1	1	1	0	4	0	2	4	2	1	0	2	0	0	0	1	1	0	4	1	0	0	0	0	0	0	6
204	199	451	220	379	203	845	575	302	1405	864	1363	347	481	136	695	400	526	1005	377	966	126	413	274	452	538	428	265	1839	503	476	304	1184	857	625	500	1029	391	74	203	459	490	652	346	85	718	213	971	184	446
156	475	241	225	538	284	365	442	444	1336	2365	823	407	1150	185	743	171	1414	2193	885	2514	176	631	677	397	346	239	265	884	1247	452	316	391	1586	181	190	1016	299	585	269	185	286	820	606	277	533	443	506	799	242
1105	4091	1142	1851	2242	533	4010	3680	1842	5339	2195	4967	3271	1190	1649	4438	937	2238	3628	1450	9720	1883	2012	2290	1919	2072	1944	2431	6384	7704	3777	3597	2332	3248	1036	1044	3123	1305	1892	1393	2200	2019	4737	2164	3153	5287	3987	929	1986	1940
441	354	412	675	878	192	364	600	873	2812	715	2389	1220	876	990	1840	389	939	1928	1406	820	385	930	518	890	776	1399	619	2363	1739	786	562	1005	1150	433	380	1090	494	388	470	779	1155	1929	1334	406	1727	306	970	1188	59
530	651	913	730	1672	284	577	1148	1055	2151	1266	2518	3802	991	3512	1483	643	1095	1621	801	2004	848	873	427	1018	889	1920	1005	1308	1019	1483	686	1474	1196	739	526	982	707	376	479	1205	1265	783	1087	397	1891	284	943	822	308
164	180	200	219	230	98	183	239	352	454	39	516	186	146	278	42	122	151	1347	246	307	181	115	97	260	101	429	302	401	577	40	135	376	790	174	177	226	81	78	145	255	347	1253	359	116	134	24	199	166	7
774	1361	1466	1411	3554	640	840	2850	1686	3210	3340	4012	4547	2391	1507	2788	842	2239	3247	1159	2197	2261	2226	993	1424	1461	2709	1710	2720	3527	4604	1584	2015	2118	987	862	1052	916	1743	1346	2783	1781	3366	1584	1133	3678	684	910	1930	295
21	0	1	4	10	0	4	4	10	4	1	7	0	21	13	1	0	5	1	524	36	10	161	4	14	14	0	27	1	11	5	11	16	5	0	11	3	2	8	8	3	1	6	10	1	1	0	0	3	1
1338	1721	746	1011	2688	728	3014	2532	2169	4690	1077	5659	2204	1206	484	1746	1141	1572	2069	1211	2037	734	1876	1927	2118	1803	2033	1634	2502	5510	3326	1576	2913	3554	1421	1663	2380	1002	730	1061	1894	3019	3681	1487	556	3690	1074	1948	1343	2176
1296	2007	2469	2344	1216	1739	1961	2380	7826	1769	325	4525	5342	1578	367	9756	928	5192	5333	892	497	3705	4520	1835	1337	807	2580	1254	1821	12208	3335	3805	1337	2997	1657	1340	1314	276	1570	1976	640	1196	1796	318	3237	13296	195	665	2829	5934
2537	4339	3632	3658	6455	3201	1918	5379	13726	8705	4426	7080	7758	4809	4790	8709	2804	7039	12845	4674	10215	3441	7869	3124	4958	4932	7652	3474	5950	8820	4947	5642	6651	8065	2938	2416	6652	1894	6530	6284	4739	4731	7512	6076	6366	8568	3973	3844	11216	893
104	14	8	20	72	7	66	563	49	28	71	82	112	12	25	213	25	112	54	474	651	10	40	444	47	23	40	66	10	27	46	52	35	12	99	36	19	23	310	16	87	73	15	146	7	61	37	23	31	77
875	2238	4253	1051	1853	1473	2237	1538	1632	3895	1856	3639	1977	1241	510	4343	994	5151	5078	1127	2466	1581	1660	1213	2296	2817	1781	1343	2985	6121	1908	1703	2453	3093	1414	1020	5501	722	899	1126	1233	1582	3793	1909	992	2400	1127	3150	1890	667
747	1035	321	1170	1869	340	693	1515	1911	1414	1516	2343	1515	1143	1070	2308	844	1520	3493	1212	507	789	849	964	1130	2207	1420	637	1745	2669	1752	408	2276	2055	1212	952	700	388	418	1007	1362	1952	2288	1272	463	2619	267	1574	1511	255
3503	2859	903	43902	11761	27473	8278	1435	6601	20411	49214	8448	8383	5574	5106	17062	1856	15181	8503	988	12431	24646	1514	1636	31505	14787	1998	3864	12616	7388	3368	7100	4032	153894	7812	2119	9141	8399	2242	1522	1241	2238	4862	3104	928	23575	3596	10712	4532	4157
245	285	294	390	836	119	329	466	1103	1195	580	1219	792	529	511	889	270	466	1028	375	728	291	426	321	568	530	793	351	1363	1012	564	439	860	735	383	352	590	263	828	601	467	790	1314	896	956	967	130	472	1237	44
55	189	14	70	101	40	102	28	92	235	17	120	40	185	156	56	78	145	230	27	163	9	60	12	82	184	296	71	71	86	109	43	351	160	63	138	154	47	181	36	46	444	109	127	32	141	35	131	60	195
464	1136	369	403	879	249	1217	893	697	1739	1398	714	585	235	426	1118	339	905	532	1321	1154	515	117	224	618	421	719	915	1049	1609	1199	973	1159	1001	483	322	1387	213	351	315	578	437	735	778	738	595	249	438	715	204
411	1235	1293	1055	3969	411	347	1704	1130	4203	449	1823	4705	2193	944	1811	580	1669	1610	1080	2037	822	1892	591	1163	818	1304	1305	2197	4252	3507	2791	1313	1295	773	622	1654	581	692	513	1267	2308	2593	1862	1167	2458	1013	2048	991	150
0	0	1	0	0	0	0	0	0	0	0	0	0	0	0	2	0	3	2	2	1	0	7	0	0	1	1	0	0	0	1	0	1	1	0	0	4	2	0	1	0	0	0	3	1	0	0	0	1	0
236	406	220	264	676	183	590	445	763	759	557	685	391	127	220	313	362	506	525	501	743	319	174	350	300	258	616	302	405	629	522	299	1066	534	532	273	262	165	440	523	290	464	614	444	526	580	240	497	368	362
93	227	63	142	327	107	392	255	259	445	190	448	229	189	211	441	154	146	306	100	256	168	257	165	210	212	255	173	785	135	237	187	420	241	151	136	214	126	106	133	123	320	211	287	87	391	228	239	63	827
1756	3694	1368	3493	3380	1318	2517	2621	3345	4627	2039	3890	8860	2248	2060	5676	2151	3220	8566	1817	5531	1987	5167	4400	2702	5446	4833	4213	3677	4783	4112	2663	5308	6047	3061	2682	1901	2105	844	1584	2033	3319	7879	2653	947	4680	955	4882	2705	345
7132	13099	806	11073	12125	2807	3858	11282	17642	18313	11185	15470	19703	16969	2195	5863	4133	6488	36254	13941	2567	4227	8433	4522	11092	12474	47523	10917	8187	11133	11092	3366	12992	13149	4808	7551	8322	4554	11034	12129	6162	18064	20423	17215	6947	24148	1280	10934	34956	564
1744	1720	3854	3217	3654	1359	1423	4148	4143	3977	4845	3999	4961	3754	1650	2861	1227	5487	8893	3124	4403	2617	5995	860	3538	3442	6822	2510	4876	7380	3520	2543	3003	5047	1557	1255	2633	1495	3786	3107	2036	3032	3761	4443	2707	4609	1005	2592	7408	226
5	0	11	5	12	4	41	1	16	5	3	4	2	1	3	1	13	5	69	1	387	5	7	1	2	5	9	5	10	10	3	18	51	8	16	7	3	2	2	3	5	10	6	0	1	13	2	4	3	53
1	0	0	0	6	0	9	0	2	0	0	2	1	0	2	0	1	0	0	0	0	2	0	0	0	0	6	0	2	1	0	0	14	0	1	1	0	0	0	2	2	2	0	2	0	0	0	2	0	1
19	11	7	18	89	89	75	2	58	43	14	35	26	50	4	14	16	200	30	80	162	26	344	7	40	26	426	22	76	104	4	33	98	58	51	32	24	60	14	18	19	58	22	26	4	33	12	7	8	23
1205	616	254	1753	1619	419	1753	637	2090	1716	38	1234	685	419	447	2716	333	2036	1325	948	1695	2851	1006	1393	1115	476	413	222	342	1284	1197	382	2281	1622	396	381	1904	415	808	816	518	984	470	693	260	2933	2256	575	732	1830
171	71	3	1146	158	305	517	195	77	178	2267	914	1958	647	59	807	68	42	13	4	3557	57	271	469	55	91	83	474	77	3220	32	4432	201	1080	129	18	27	293	270	79	270	71	2088	161	355	68	15	3	480	16
977	1625	1850	1311	1894	1281	2516	1466	2344	2952	1605	2242	2264	752	830	3440	929	4095	3574	1080	1684	1167	1763	904	2024	1890	2194	1340	2243	5043	1404	2267	2329	4740	924	967	3858	657	1585	1366	1691	1477	2994	959	1953	2330	918	1285	3172	1476
2945	2843	447	2043	2878	1024	2783	8697	2644	9413	11832	13015	4723	3362	959	1835	1863	2598	5927	937	1947	3647	2860	952	2502	3390	2194	5570	2215	3728	2742	635	5730	4291	2289	2811	2120	778	446	1522	4971	2951	4292	1921	423	4414	908	6783	2070	893
50	9	671	0	0	418	17	0	23	6	129	21	4	55	0	17	0	187	48	10	22	1	2	2	4	213	0	0	38	264	2	5	1	148	2	0	177	1	13	0	1	2	314	119	7	176	2	2	18	9
2226	1119	199	2902	3102	701	688	575	4317	6661	1330	3855	750	2049	414	314	1695	3001	3365	2104	979	667	1046	695	2770	2621	3636	974	1229	1297	1109	950	3326	2806	950	2114	2035	974	1125	1418	1785	2274	2461	1400	624	5972	657	1694	2934	2087
397	1527	498	602	1407	478	1002	1209	728	1762	712	1377	1194	689	795	1867	580	942	3060	1128	1752	610	1665	603	667	811	842	863	1565	1574	950	692	1637	1620	820	319	3998	386	890	700	584	861	1003	1656	1319	1817	1159	509	1500	610
275	207	2	76	125	9	344	62	121	57	15	490	328	53	18	24	1111	13	25	106	632	43	7	715	74	12	1260	473	2035	51	355	3	3393	80	533	523	266	37	68	158	117	606	114	197	1	217	42	398	24	83
0	1	0	0	0	0	0	0	2	1	0	1	0	0	0	0	1	2	0	0	0	1	75	0	0	0	3	0	0	4	0	0	4	0	1	1	0	0	0	0	1	0	0	1	0	2	0	3	1	0
1027	2473	719	1547	2261	633	1651	3945	1660	6902	1832	8145	4309	2518	1425	8631	880	5170	2902	1625	2765	1451	2429	2969	2498	3143	1304	1834	8664	3510	6919	2159	2902	2532	1600	1055	1170	1373	450	869	1555	2330	7256	3075	662	4678	564	2777	1451	477
8945	18028	8225	22010	34433	12112	13771	45302	15472	60999	23775	60136	48757	22764	12237	44772	15352	23398	35111	27959	26389	20629	27847	19965	19638	33345	25013	29947	91858	47509	29282	33245	39274	31630	21156	16420	20991	9710	4021	14237	21122	24448	34649	21784	7289	31412	13370	22349	11676	5424
335	798	548	449	1005	247	939	1006	789	2301	1021	2147	941	403	347	3406	544	732	2770	731	796	707	727	642	883	423	945	659	2161	1812	1050	762	1601	789	758	683	1453	379	165	463	693	1327	879	887	206	1197	366	1977	279	632
190	272	141	238	370	222	400	325	204	500	1319	1283	170	119	45	593	266	557	1618	403	555	145	327	177	296	339	637	199	213	157	229	142	685	613	278	296	2182	146	383	230	136	296	158	154	179	558	32	357	168	668
396	45	221	683	397	224	816	340	362	379	35	601	487	29	3216	7	77	101	209	21	39	99	82	333	207	45	197	458	154	117	258	328	146	762	348	156	41	71	185	206	699	142	71	61	110	1864	1068	316	287	1900
32999	35480	30668	31202	69527	32554	15671	88486	27013	70285	55100	57059	176753	39347	50671	60977	12295	58829	91115	21663	115249	42300	59497	33186	40856	19536	28875	30040	67152	108648	45041	71690	34149	72755	25441	14856	61239	24386	12859	24100	35937	34037	122068	45380	15834	76755	42916	39426	26119	4046
2964	8827	2294	15308	6837	7220	4777	19637	3442	3817	7872	12776	14608	6167	886	26723	2014	26454	21128	6589	10783	6526	28812	7199	8587	11119	2814	9057	1305	23863	7249	7445	4959	41297	4873	2213	5956	2687	2371	4225	5639	2646	6820	2583	10274	16903	3036	5501	12421	4040
284	603	326	414	779	184	420	902	1489	1193	375	1580	697	281	560	1366	359	374	1494	492	644	495	634	389	991	335	976	504	1094	913	619	492	1521	688	850	580	599	383	263	846	785	680	845	960	409	1125	433	1541	516	329
742	1748	706	571	1799	461	1982	2092	1959	3512	485	4471	1521	702	1524	3863	1010	1722	2258	1753	1886	1237	1797	1244	2287	732	1378	1185	2631	2050	1665	1845	3706	1748	1483	1153	3218	628	269	952	1865	2008	1585	1875	341	2718	1576	4966	334	1327
211	158	28	128	460	547	525	150	814	332	3198	569	563	185	144	219	1241	145	338	74	291	264	175	151	362	137	1422	436	1294	233	464	1220	3580	281	866	1182	235	400	90	504	323	862	196	329	133	380	305	224	134	537
0	0	0	0	1	0	0	0	1	1	686	0	1	3	0	127	0	0	20752	2	4	0	1881	0	0	10	0	0	39	0	77	0	0	1025	0	0	46	10	184	0	0	0	0	1	7	0	0	3	2656	0
266	137	155	389	441	92	1561	247	576	458	158	565	796	170	266	72	774	122	236	21	553	211	133	163	592	105	575	684	428	266	1221	249	3121	445	711	1082	715	403	82	95	365	762	158	284	48	362	107	106	56	906
701	1266	473	753	1389	404	1147	1808	1028	1560	699	2413	2142	849	483	1717	739	1272	2106	671	1106	667	877	564	909	1739	1722	1455	1644	1660	2754	612	2567	1262	1208	1023	1223	520	362	380	1131	2207	1830	1307	382	1734	527	886	705	757
612	1159	411	806	2071	723	1773	1406	1530	3131	1129	4893	2264	957	925	1525	974	2168	2107	800	2469	1128	1139	584	1077	1476	1432	1232	1706	1885	1075	699	2574	2090	1073	1072	2616	516	495	970	1115	1886	1719	1098	388	2506	1172	1778	530	2189
642	1332	733	857	1557	267	1526	2610	1801	2668	825	4170	1755	519	1152	3175	600	1459	2960	1480	2473	1122	786	1047	2318	756	1129	1228	2170	2670	2364	1698	2131	1238	912	748	2010	720	347	1718	1323	1253	1917	1265	451	2140	1366	2875	651	761
1321	2869	976	2381	3266	526	2973	3376	2752	4854	3527	7005	5747	1877	3162	2861	1553	2696	10819	1680	7173	2377	4374	1278	2206	4009	4592	1723	9214	9849	4240	2508	4292	1847	1692	1524	1997	1356	1716	2115	2328	2624	5077	3291	2225	7529	1856	2242	2579	784
2460	5043	1699	3432	6151	2520	4128	8078	3803	7163	4934	10323	6884	2880	1391	12849	2097	7472	8147	4138	13860	3435	4169	2880	3964	5820	3844	3104	11075	8583	3989	5027	5399	6805	3034	2530	5314	1749	1649	3281	4102	3330	10993	2424	3408	10801	2497	3725	3793	2651
1458	1576	936	1808	4098	796	3405	4855	2027	5892	748	3340	3081	2081	577	4803	1152	1029	1660	1605	2614	2489	2647	1604	1922	779	1699	1363	2664	3899	2118	1175	4272	2762	1476	1376	1974	601	738	1390	1937	2071	2376	1593	623	5621	954	1250	644	4684
1036	1649	160	870	1988	956	2082	2982	1018	2677	146	3416	1224	1086	780	2056	2551	2830	1687	1087	1245	915	2781	719	1155	1918	2046	821	2429	1839	654	820	6367	1126	1671	2861	602	473	335	913	1301	1942	1475	653	311	3619	862	815	758	3976
4345	8051	1997	4432	12047	3979	15067	7722	2926	13715	6349	18977	10481	4394	2511	8716	3561	11033	14728	6647	15579	3830	11285	6132	6183	5638	3350	7711	12788	9999	11209	4868	10180	13465	5076	4226	8533	2816	1200	2103	4540	6038	16854	4194	1665	10437	4893	8299	1274	6371
2149	45010	191	12387	34934	320	9335	739	10101	74453	37	3044	9602	6744	2499	238662	2027	202228	478	48857	3379	13021	36116	682	42536	3146	2507	1212	73143	5282	2585	5264	7336	31152	3796	850	64644	4311	2470	15514	4159	3813	540	10810	38368	26250	10166	6557	3367	1635
530	512	789	885	2018	665	2479	1923	809	3709	1197	2248	2519	1345	537	2944	1382	1310	1991	873	1223	666	2917	773	1425	1471	1385	960	3068	3598	2931	916	5537	3093	2764	1188	1156	593	183	566	1138	1780	1453	1417	264	1709	382	2197	367	585
543	1352	420	570	1036	329	743	1839	1130	2643	372	3547	1629	683	813	954	546	556	1463	1066	1310	530	504	765	774	670	1220	844	2095	1038	1832	494	1536	807	719	572	879	433	660	746	679	997	2332	1491	721	1482	618	672	972	219
86	46	78	11	258	7	621	65	539	178	7	90	713	149	515	935	166	653	48	7	76	550	278	666	842	168	275	155	48	331	28	249	490	220	268	147	1274	200	14	444	1314	313	6	252	187	49	299	41	293	31
19	23	37	30	24	7	149	23	34	62	56	34	55	26	35	59	85	8	28	1	54	31	23	14	67	8	157	25	56	36	91	12	410	28	96	79	134	5	9	10	21	129	7	44	4	49	10	43	10	131
508	561	717	808	1171	919	829	851	1332	2193	2271	1427	756	754	397	1505	459	1188	2913	452	1703	320	692	458	731	1041	1326	534	1102	1559	871	703	1338	1462	528	573	1093	438	1285	1206	470	782	2279	510	1121	1547	418	478	2724	578
110	93	219	196	300	70	441	225	547	1453	231	923	166	206	328	601	282	160	1143	585	1425	121	364	294	267	205	736	123	590	468	408	166	1160	369	355	478	1401	140	236	757	235	824	389	657	306	809	328	368	315	721
2199	4412	828	2030	4214	1362	3411	6741	2073	3666	1890	8748	8469	2539	1294	2868	4905	3370	1334	1124	2301	3873	4285	2665	4030	2594	5276	3588	12375	5103	5717	2555	11513	5819	3234	4146	3490	2696	589	1995	3899	5302	6605	5677	508	6371	2570	10422	622	1417
183	93	53	300	250	75	541	169	188	250	87	317	332	117	60	392	669	119	196	247	105	104	119	148	285	134	1087	380	88	193	413	151	2158	310	447	801	103	118	72	136	178	718	207	156	46	273	38	144	110	176
9	23	6	1	125	6	31	22	12	37	7	151	123	6	60	98	26	15	25	57	541	22	18	86	18	22	26	42	153	28	190	10	56	7	26	29	19	18	1	24	34	52	4	49	6	167	38	33	1	52
7799	7858	3318	11943	15675	8546	6566	9053	6609	17739	27622	26780	26206	11625	5029	22858	11051	15055	39549	6613	10899	8565	16822	8015	12730	25473	13733	12385	17312	29233	13746	18265	32993	27150	13508	13027	8151	10134	3162	3217	8067	11920	16895	8875	2802	18092	2511	6633	6353	3956
832	1670	855	1155	2470	1737	1815	1247	1642	3107	1897	3304	2538	1289	666	2271	984	2586	6526	502	2352	792	1693	1160	1646	2570	1414	1227	2848	1611	1905	1263	3092	3262	1386	1304	2082	967	1150	1014	1221	1421	2692	1068	915	2115	720	1635	887	1324
2288	9117	270	1644	5795	86	6788	682	16941	8564	4008	3827	2323	5765	476	1367	3369	813	31120	33	1711	12715	13	4090	4758	2584	4701	3107	1609	2780	3311	834	4758	10395	3047	3405	1392	337	333	3075	2562	5094	3229	2899	1678	6748	486	22142	997	4431
712	1039	490	917	1910	584	3158	2204	1694	5692	2102	1940	1345	804	542	4292	701	1416	2696	1494	2477	778	1644	1155	805	2219	994	837	5044	962	1282	1661	1985	3061	756	724	2421	752	483	1247	648	1286	2206	951	765	3131	968	1455	706	1189
728	605	123	551	520	517	1353	499	671	807	454	1431	269	241	44	6860	205	220	5834	3426	1656	116	72	696	355	468	416	254	1730	119	315	123	354	2618	302	236	871	139	721	2083	182	606	274	197	264	4702	130	178	1125	5161
1308	2512	1297	2610	2702	723	1734	3746	3732	6503	3300	6682	5403	2738	1736	3804	1337	2333	5003	1819	2805	1681	2031	3008	2208	4275	2673	2557	2948	6847	3192	1544	3152	5215	1517	1377	1748	1064	1404	2565	1995	2440	4028	3588	2603	4607	1000	2617	6346	360
258	639	422	548	885	294	387	492	447	672	1242	580	996	681	387	898	184	897	1799	501	1030	760	753	422	389	497	605	439	656	1372	901	307	339	598	260	158	403	214	437	393	385	498	960	1044	952	708	480	375	1320	105
343	1121	175	469	2464	249	2184	929	725	711	801	989	2184	395	395	2553	1536	1442	1736	513	862	674	754	822	845	266	1894	613	1090	2188	1477	600	5946	866	2985	1111	592	527	341	552	1008	1123	1020	554	151	843	384	331	253	1879
1241	2398	850	3513	2846	921	4316	5032	6413	3194	1861	8323	4754	928	1153	1949	2130	3657	3966	1147	6120	3105	775	2042	2060	2324	5239	2043	5170	3848	2701	2004	5355	3417	2881	2428	2271	1547	1467	3447	4715	4471	3108	1397	2059	3679	1387	1183	3118	1663
772	1257	712	1103	1392	722	2099	1586	897	2544	900	1798	1733	703	350	1578	900	1178	2043	739	1482	593	1017	638	1089	1247	2198	1048	1193	1569	1017	882	2008	1537	697	824	1277	631	553	772	744	952	1732	587	1071	2148	477	872	1892	1750
326	613	29	135	1016	118	187	109	681	63	7	703	30	91	48	19	16	133	250	36	21	52	80	148	294	77	24	239	45	100	16	344	57	240	45	11	177	44	740	98	151	480	512	91	13	902	479	7	640	78
1618	1122	1511	1346	2260	1138	2946	2953	1672	3122	1527	2691	3519	1026	812	1890	1460	1108	1642	1066	1436	962	1839	1027	2073	1541	1991	1287	2985	2064	3138	1191	3950	3340	1570	1285	1142	1039	355	1118	1878	1937	1793	1465	468	3065	617	3899	596	969
2037	2476	1015	4900	9186	118	7757	25374	5225	7822	51	31183	7941	2463	4283	2332	2932	145	1554	501	2233	5384	29	2334	6745	12199	5991	5316	18335	1168	7566	6668	9130	1235	5838	5036	2336	285	1011	19793	4854	8923	15800	8088	3978	4685	273	7080	6982	5433
1063	3405	1397	2375	2314	1909	1989	4707	2791	3955	1960	4437	3844	2100	1176	2886	893	3448	7266	1991	4815	1573	1793	1744	2093	2004	2647	2052	4795	3714	4240	2197	2505	3648	1126	882	2754	1300	2402	2219	1878	1549	4867	2088	3464	5629	1055	2547	7494	1012
0	0	1	0	1	2	1	0	2	2	0	1	0	1	2	0	0	3	0	0	0	0	0	0	0	2	0	0	1	1	1	0	0	0	2	0	0	0	0	0	0	2	1	3	0	2	0	0	1	0
1761	3367	2352	2250	3595	1533	3805	6852	1697	6471	3614	4118	3472	2388	922	6130	1779	3315	2606	1588	3565	2332	2762	3311	3436	3337	1616	2053	6928	4779	2466	2182	5165	4937	2309	2106	2332	2059	430	1004	1855	2137	4686	1561	593	5620	1644	2668	623	5020
2089	1916	1445	1603	4267	1934	10151	2979	2163	7157	2058	7705	7651	1605	2205	6738	3429	3154	2715	4208	2973	2063	2641	2727	4445	3016	3372	3360	6291	7154	3740	3208	9692	5907	4779	4503	4320	2035	273	1988	2497	4262	4103	3259	443	4334	1220	5663	470	5411
4275	4259	1215	3797	4681	671	3192	12709	5222	3559	513	9061	5856	1868	1185	309	5436	1554	1895	1049	3044	3004	460	5817	4491	3014	6032	10576	2286	3973	4576	3939	10865	4225	6015	6624	2007	1192	848	1656	11949	5543	4853	2313	630	6714	2347	4403	1282	4840
6970	10465	6085	8985	15589	4623	10369	11281	7000	25921	9322	17448	17319	7423	5496	17140	5557	14778	16755	9137	16075	7256	14288	8003	13079	12651	10435	8901	11087	17221	11824	13268	14632	14761	8074	6532	9874	3603	2543	6282	8071	10901	18889	5874	3403	18034	4557	10001	4842	5048
977	2405	1222	1103	2024	1127	872	1756	1220	4240	1686	2667	1780	1419	456	4776	485	2937	2767	1530	3172	885	2750	1171	1617	1612	1119	1481	1888	2650	1509	1550	1295	2277	652	625	1933	877	527	406	1260	1049	3099	1195	686	2495	972	1253	1028	1253
451	569	86	290	681	161	3561	225	1104	11334	184	1415	719	1063	670	52	474	353	690	564	204	296	505	451	580	395	402	69	11443	790	4597	88	1097	1900	501	263	4315	286	434	1306	3009	2109	803	2171	530	1150	1383	3090	193	37
2022	8982	358	2560	4206	1766	4207	1017	11419	11165	441	7097	3052	2009	5104	2497	2915	7041	14633	3572	10782	1232	1543	5072	2937	17940	3129	1995	3432	5466	1956	8027	7849	4714	3307	3898	3461	650	1093	3969	1951	3264	3482	2390	4947	12160	6690	1636	3130	3349
310	754	225	287	692	270	699	967	712	898	536	1101	591	339	256	427	289	406	691	324	1098	318	371	385	469	433	613	589	635	462	475	237	837	662	426	381	391	221	264	343	468	473	593	394	381	956	307	455	594	852
57	39	4	64	68	168	189	33	44	182	1754	97	123	28	82	128	40	147	752	66	131	16	384	36	81	78	29	94	77	75	44	83	175	314	80	54	207	169	41	22	33	79	28	80	18	86	255	42	20	154
4714	3743	1934	3393	13392	2774	6975	3453	4812	11233	2252	11022	12896	1903	2896	10965	4202	4613	3672	3721	3174	4328	4935	3008	8554	9111	6103	4572	8275	7250	5206	7322	13553	15484	9865	5185	6090	3557	656	1601	5675	9961	7200	5182	773	8921	1936	5403	2101	1516
3519	2664	1543	5556	5703	3965	3613	4837	8027	9796	6961	12213	11114	3287	3684	6616	4392	5916	11311	4539	6352	3768	4128	2698	7917	6410	11707	4405	10672	11333	5779	3824	12345	9873	4573	4312	3653	2732	4257	4644	6332	5731	8025	4982	3883	11336	1480	4758	10866	2292
686	515	139	744	988	684	2092	679	647	1568	540	4418	875	936	395	354	1450	644	552	933	297	204	104	744	897	437	1659	592	2951	819	1023	257	3247	1301	1581	405	1878	401	195	578	944	2545	2527	750	314	1829	407	1830	394	1460
14	64	0	7	21	2	4	0	23	120	6	285	19	9	5	4	2	1	794	6	22	6	1	2	8	44	5	1	6	375	8	4	7	10	2	6	9	4	7	22	4	4	192	10	14	10	6	7	92	5
548	527	14	349	660	168	171	24	614	655	120	766	100	583	14	53	62	676	621	286	75	71	150	66	302	832	306	48	186	205	85	169	61	741	56	90	422	385	398	338	132	158	525	206	57	880	71	110	944	307
180	591	1362	274	647	177	122	1226	154	1129	0	301	1304	1014	490	3122	89	1472	1277	976	1039	395	1134	457	457	520	294	95	1165	2533	1221	450	623	796	249	104	595	360	109	129	339	541	1154	491	288	3886	171	115	198	106
5286	1767	844	5925	3532	5747	7207	1790	4542	11697	23787	4057	3360	888	1290	4958	1522	8180	2504	3139	7992	1534	4714	2905	4884	1219	1837	5487	6654	4094	6993	5171	5789	15684	5990	2604	2427	6871	1642	839	1520	1553	2559	1550	486	3227	632	1444	2534	799
1149	2458	2455	2238	3230	1488	1632	1612	1659	4733	3039	3177	1610	2742	1838	5358	896	3425	3517	1524	4575	2549	2405	1329	2175	2529	1451	1088	4255	3421	1363	1221	2496	3626	1444	1004	2092	1857	1313	1273	1821	1633	3893	2889	677	5194	3431	1331	2346	1308
6188	1483	3257	16221	4222	5020	6592	8876	7239	3696	196	10003	9895	725	540	896	4032	691	4927	94	1179	2657	775	11359	4674	855	7286	10812	14500	6038	18757	1999	11974	12840	6044	6481	469	5286	952	3175	6763	5097	975	5809	437	7119	115	6583	2802	427
709	975	1486	1267	969	1577	895	1394	1345	2705	1606	3000	1396	1519	384	2984	477	2022	8623	1461	3385	530	1858	831	1191	1663	1525	495	2131	1619	1652	691	1174	2263	628	482	2962	563	2377	1393	502	902	2206	3762	2393	2596	603	1110	2559	189
2981	3960	775	2044	5813	1946	4399	4784	2567	8909	3404	8091	6556	2654	1701	6034	2783	4786	3904	3116	6100	2196	3657	3174	4166	7151	3535	3624	4525	8383	4851	2592	8675	5917	3476	3324	4096	2010	836	1200	3533	3573	5524	2686	721	5695	1697	4507	1375	7623
8017	10633	5067	8258	10540	5079	12896	28895	10126	23509	5498	36002	19009	10078	5511	14008	4247	7155	17552	6544	19076	9715	10313	12874	11306	14891	8637	9078	32417	14403	18606	15088	11789	20962	4865	3996	16518	5522	9438	8687	8661	8937	19852	9282	8435	30469	2735	17262	5635	3207
2382	5630	3602	2983	6156	1018	5975	28514	3259	2459	1742	23572	24973	2462	7290	13279	7744	3854	8602	2188	7878	4867	4474	12219	5503	2041	9219	10938	9168	12474	8887	8150	21617	2706	8259	7482	6412	1953	669	1628	16369	8513	3702	5257	1768	8760	4878	3940	1542	7001
426	118	23	399	399	83	39	48	738	868	87	940	61	398	52	136	42	264	339	244	108	68	224	110	628	373	70	94	220	342	121	197	41	464	57	75	177	293	73	285	128	216	742	351	29	357	34	383	154	41
94	59	35	176	183	116	105	140	125	109	123	480	417	68	92	483	124	56	1473	105	189	65	354	123	132	194	230	71	434	186	628	153	447	215	129	139	88	65	91	168	48	163	154	619	37	333	53	465	293	46
3288	6098	1849	6060	6469	3075	4157	11013	10075	11000	9198	15509	14407	4244	5810	8845	3951	8265	19826	6864	6306	3867	3785	1642	6425	3792	21450	4312	5266	5013	5624	3829	9520	12959	3489	4439	12498	2981	5506	8193	5713	6988	5431	6212	6574	19913	3258	11802	11950	2806
213	493	181	211	622	216	324	512	521	1023	609	1108	857	419	241	707	196	525	750	249	705	365	593	204	392	516	324	257	633	467	579	375	700	620	324	315	559	158	256	439	255	565	635	388	203	957	365	821	680	597
177	220	214	17	202	18	237	145	180	535	1	67	56	17	67	416	52	20	7	1	22	185	3	96	121	63	66	49	42	35	11	32	253	47	235	70	728	35	4	81	66	97	2	23	4	27	31	561	8	33
1015	2064	1079	1689	2301	1242	2992	3195	2711	2816	2052	4142	2546	848	863	2456	1182	1768	3167	1969	2334	1344	2960	1078	1620	1148	3211	1755	1958	5621	2972	968	3288	5333	1432	1107	3423	745	1869	1798	1594	1831	3737	1901	2662	3914	1050	2230	2449	984
3107	1755	720	7369	2187	5061	4283	3093	5893	4574	3608	5370	7142	1250	504	625	4211	2740	9212	224	1849	1135	1855	3188	4191	2083	5198	5582	8659	3709	7715	2770	11138	12693	6595	5269	639	7133	2139	2246	5298	4493	2655	2476	888	4253	630	36823	5517	662
374	691	615	782	835	588	600	894	568	2368	201	1651	1831	854	730	1929	614	1451	1753	1314	1015	556	1450	887	908	1272	968	954	1270	2047	1836	781	1291	1365	702	524	631	211	127	323	533	696	1538	813	304	1630	320	1359	487	212
714	924	95	778	1510	818	711	295	1008	1090	385	1105	2072	258	306	1686	317	3322	4803	839	473	316	183	1013	1887	1110	530	473	359	554	1460	1560	681	6829	401	509	1806	532	687	748	474	741	1102	880	142	1075	1145	2076	3055	1206
1108	2307	871	1622	2840	1525	1619	6219	2418	5253	1431	4875	4145	1061	1458	2099	1041	1503	3550	1537	4231	2943	1604	1556	1922	1676	2312	2012	4912	2332	3844	1761	2961	2586	1022	1217	1927	905	960	1280	1799	1735	4547	1913	1990	2236	1357	954	1814	542
2465	4065	1662	4048	4738	6974	4941	3660	4119	26088	7003	8046	3325	2304	1809	4206	2873	8508	7595	1194	4464	2085	1824	2863	3866	8647	4619	2610	5157	4348	2812	2853	7810	8707	4054	3005	4444	3874	1818	3452	4025	4058	3456	1927	1469	10854	2300	3795	4022	2315
1044	2467	707	1303	4325	1532	1419	5091	2398	2950	1899	5127	3190	1833	2589	2772	1162	2990	4597	1271	3269	2885	1717	2012	1933	4614	2225	2106	2742	2017	2207	1394	3673	2730	1629	1604	2538	724	967	1368	2895	3855	4058	2100	805	4342	1268	2925	1501	1286
65	230	20	88	695	69	1003	35	211	575	108	844	275	47	238	27	477	149	110	163	629	139	29	391	135	112	596	70	53	164	99	205	2887	259	866	308	2994	60	22	363	130	629	219	337	38	1286	703	783	104	318
232	521	687	777	889	401	225	1392	166	934	9	734	1624	967	549	501	1049	851	1092	45	914	322	89	267	731	663	2147	1394	370	1097	2883	1017	8254	551	965	790	265	280	131	106	740	2424	720	3181	275	1012	116	182	224	120
37	547	8	57	80	75	95	171	67	56	158	428	491	4	81	3	83	34	51	6	37	29	149	744	183	31	71	24	251	30	442	61	136	286	304	46	10	217	26	42	89	29	74	214	13	48	22	18	34	33
144	62	0	72	1447	24	70	26	163	115	10	181	127	307	19	25	50	179	120	123	25	36	3346	19	86	119	682	12	2355	64	46	92	135	76	63	83	88	60	148	74	969	716	2082	162	51	293	77	209	195	178
1984	2060	684	2159	2961	1034	2868	4882	2701	7175	2455	7905	3710	1435	1976	1845	1748	2289	5030	2847	5036	1523	2113	3477	2551	2256	2959	4487	3416	5559	3916	1466	4241	6049	1680	1628	2788	959	830	2370	2810	2789	3724	1886	1447	3256	1613	3938	2859	943
49	70	7	70	86	29	127	9	66	663	53	59	62	28	16	23	56	52	75	1121	11	32	87	7	43	34	127	69	86	54	56	45	256	73	77	65	42	40	32	14	21	313	39	110	16	116	5	46	35	29
1420	2163	2535	2136	4094	1279	2399	4777	1429	5348	2822	3119	4787	3878	2486	7808	2031	10954	5951	3857	2677	1696	10429	1745	3490	2397	4922	2749	13239	7719	3473	3117	7673	7940	2279	1828	1616	3009	865	1455	3011	3529	4566	4210	757	4300	341	5387	1969	216
761	1514	1515	986	1876	459	1112	2225	1393	4170	1287	5476	2076	1416	797	2121	1136	1336	3355	1344	3188	1062	2934	2265	1375	1327	2738	1262	2973	2725	2712	1119	3835	2084	1496	1226	2351	658	414	898	1984	3435	2666	2314	301	2309	874	4020	823	530
9250	11594	5874	6555	16915	3006	10923	8496	14756	9651	4208	15447	10489	7903	5745	8780	3321	6894	7888	3788	5197	4762	4505	8280	12276	3295	7072	6029	18654	8568	5506	10219	11197	13653	4400	4042	9471	3868	10442	6420	8282	8891	10169	7182	3059	23994	4097	7725	8003	4261
231	336	142	513	385	258	277	327	553	992	834	904	235	367	292	462	105	438	4739	2338	484	228	574	151	348	232	243	445	1280	1006	574	558	356	972	186	175	203	225	382	202	177	311	1139	489	393	608	87	279	688	60
108	184	314	213	119	394	107	172	158	517	363	297	267	528	62	917	38	782	2071	386	1331	101	691	225	178	670	86	68	437	704	293	588	81	339	45	42	461	119	386	152	107	93	386	159	327	477	158	108	876	65
56	126	400	52	94	236	293	47	77	497	269	163	84	281	34	648	23	808	731	341	1087	52	490	115	92	839	54	49	214	1093	204	210	39	391	26	26	674	66	106	38	88	106	390	236	80	364	181	117	230	428
1308	2878	535	1508	3056	1170	4230	1931	1480	3350	1446	6494	2689	1942	376	3083	1296	4472	7692	1463	1887	1104	1245	1239	2752	3383	3196	1430	3908	6592	1593	2191	3131	3041	1220	1356	4574	988	510	1261	1882	2299	3764	1243	822	7230	889	3660	1475	2833
6288	8194	2891	8261	13116	1381	2541	5752	13387	12583	3790	12482	16283	5394	18740	637	3910	7773	6659	4810	5793	4390	19372	924	6605	5177	22402	2639	10339	9816	7838	2343	7213	9954	3172	3540	4449	2691	7521	7199	4962	12813	10198	14205	2125	12670	590	3188	20077	293
142	270	210	174	363	260	265	257	282	976	717	541	700	412	197	463	117	743	1802	399	1382	210	666	283	428	367	266	287	611	960	552	322	254	965	284	99	530	133	347	263	210	211	496	753	217	266	296	607	683	24
1501	1197	1609	2088	3914	2078	1934	3544	3579	7596	1410	5312	2837	1943	3400	5503	1341	3153	18375	3596	3544	1580	2125	1613	2158	4464	3025	1911	3506	7618	2593	2160	3867	3730	1677	1400	3230	1013	1849	2036	2471	1388	5117	2193	4320	2836	1615	2087	6110	560
306	641	566	316	926	570	1424	335	620	2319	484	1258	512	723	232	1551	292	1164	1297	421	3512	218	692	612	393	1276	471	288	665	1120	793	522	746	929	412	340	1408	334	355	427	291	810	1378	340	466	1392	481	978	703	1325
685	991	470	1562	1347	1513	4057	1384	842	8847	7308	6285	2058	852	1146	1408	1059	2286	2382	492	5757	821	2877	800	1644	3590	1289	1339	1117	6273	682	1697	4204	2868	1560	1485	4896	621	589	1456	2581	864	3862	1155	350	1102	1253	1453	682	942
4029	2997	9355	13594	5990	1251	3445	21889	9698	17991	7	33051	11677	6658	9271	14187	3269	6572	27085	2359	4196	5427	5983	11212	10358	4465	6417	8765	21304	19084	8291	8293	8955	12548	3363	2851	4241	1621	1018	9345	16650	4807	8792	5647	2631	14302	1141	11191	44749	402
841	1680	784	1013	2088	1503	2183	1194	2191	3269	1269	2386	2246	909	921	2826	771	2250	3267	1502	3355	1039	1304	1174	1668	1297	1393	799	6721	1345	1437	1029	2184	3052	1007	978	2063	741	1541	1608	860	1143	2263	1548	3289	2206	817	1129	2559	1681
1190	2431	1418	2107	3894	984	2400	2706	763	4407	3767	3726	6328	2614	1430	4589	1047	1632	6147	1291	4164	2986	3252	1214	3605	2213	2708	2275	4097	4992	5670	3174	2499	2294	1473	809	1283	1460	323	642	1652	2707	6081	2892	499	3917	618	2462	1382	346
2205	10833	997	3572	3486	454	7275	10810	3336	4382	776	12913	2284	3351	1320	994	3011	3293	3227	2323	3379	3895	617	1207	3780	4955	4791	2574	3247	1810	2371	769	6819	4074	2267	2737	2882	2338	924	3292	2276	3213	8469	1193	928	14132	937	7400	2634	5652
1673	3231	1744	4481	2161	1633	1568	4201	3716	2229	4831	4999	5385	1565	2513	17071	3970	2719	9390	1389	3886	2303	3518	1520	2271	3120	12795	2588	3316	14043	4694	3185	10119	5865	3605	3960	3054	1082	5350	3386	3649	3901	7684	2397	5162	10755	2983	1845	9174	1047
1475	4794	2903	2305	4145	2085	6405	6314	3074	8924	3323	8637	6266	2364	3010	13965	2137	3097	10735	3125	6056	3234	5227	4142	3160	3396	3700	3160	9316	6812	4033	3201	6798	5612	3009	2656	4950	1700	1119	2424	5098	4183	3704	4633	1315	9601	5545	3222	1817	4011
2	0	2	1	4	4	22	1	1	4	0	1	0	0	10	5	0	1	1	0	3	15	10	3	3	0	6	0	6	20	4	2	17	4	28	2	4	4	1	1	2	4	8	0	0	2	1	16	0	12
18	21	0	572	1224	236	1013	81	80	1953	399	1234	4953	529	498	2	61	46	41	11	3658	13	310	798	91	25	43	3987	398	10190	6609	1341	214	626	163	83	150	236	9	372	1712	448	282	653	1	207	412	204	105	32
2585	2727	1340	1993	3256	2006	4610	3930	2626	4135	6471	6004	3007	1008	652	711	2849	2862	4628	3923	1641	1418	788	2284	2716	1342	4133	2395	3405	1957	3720	1579	7897	4677	2922	3337	3787	1635	672	1020	2293	2581	3083	1565	608	5599	1012	2866	1074	3053
31	7	11	39	51	12	53	17	95	29	2	38	30	6	13	1	16	20	52	6	41	3	8	15	24	16	11	10	26	27	12	93	41	165	53	29	9	83	26	21	66	17	18	8	4	40	9	14	31	39
1140	1018	1028	1652	1930	590	1739	1763	3083	2978	1588	3394	3108	1188	1419	4311	992	1260	9222	3488	2109	872	1171	789	2577	1075	2677	1394	8349	2583	2185	1973	3069	2835	1514	989	3197	1025	1308	1999	2534	2004	4672	2755	2233	3231	463	2790	3997	205
954	1448	1026	1526	2214	1540	1287	1179	2102	3299	3026	3577	2364	2310	1230	5495	642	2146	8078	1906	2842	1501	2232	1092	2220	2579	2298	964	4243	4162	1920	1870	1486	2294	951	637	2789	1105	4038	2147	1248	1625	5946	2990	5025	5658	1511	1320	6031	248
39	20	26	16	36	32	105	27	20	55	14	50	39	8	30	65	21	35	22	7	110736	11	43	75	30	16	140	23	68	51	44	22	57	43	61	60	55	14	1	13	31	140	14	49	3	10	15	91	9	77
409	1139	362	530	843	177	362	704	1324	1081	957	1349	1105	769	713	1123	364	421	2371	1130	824	880	945	315	644	388	1038	573	1385	1438	1057	905	1182	996	538	406	544	288	846	892	475	1017	2513	1288	846	1135	304	805	1514	55
24	10	12	34	70	35	92	12	55	334	127	65	17	49	32	380	29	102	75	85	57	16	268	34	62	85	78	27	40	50	38	15	62	137	35	41	143	16	29	16	38	88	81	116	8	71	46	131	49	179
133	98	99	135	201	79	89	171	127	223	29	291	161	96	141	137	140	100	113	32	169	68	156	143	144	65	103	112	184	105	215	74	467	153	225	204	175	125	44	51	73	259	257	120	36	127	78	95	33	220
612	174	1803	2736	1221	21591	3303	4260	586	360	385	14080	14899	537	708	8769	5558	14592	11899	335	2564	780	24186	18478	1923	1679	3550	3353	59	5528	14565	848	16389	8728	4295	7360	1076	886	306	947	837	4946	758	3877	45	6286	2125	2685	4489	3054
997	2057	1175	1183	2488	910	2693	2364	2134	2393	2276	2311	2413	730	1098	1629	1179	1496	2195	1919	1982	858	1736	1115	1250	1387	2391	1782	1548	4397	2187	1199	2892	3670	1229	1373	3731	757	911	961	1309	1576	2655	1593	1157	2550	1086	1914	1677	1529
618	1796	397	781	1898	478	1391	1473	1420	2218	861	3803	1539	881	1083	3302	1215	1563	2418	972	2505	694	1477	899	1045	1228	1544	775	2754	2142	2317	1074	3359	1233	1492	931	2359	415	812	908	809	1814	1275	1518	991	2316	1412	734	1361	1374
978	2898	89	606	5171	113	581	4281	2722	1333	410	2834	1860	862	5495	137	1308	214	778	287	1197	807	309	633	1391	377	3415	3991	1427	2891	1247	3739	3139	1570	1358	1000	1037	267	177	448	3463	3715	734	3517	112	959	696	1260	752	77
1425	3156	1322	2421	2959	1623	2096	1756	4602	6307	1695	5644	3437	1748	1959	4141	1316	2408	7650	3264	3221	1698	2355	1975	3052	2286	4607	1861	3811	3924	2230	2785	3576	4684	1614	1417	3216	1134	3381	4129	2260	2544	3558	3384	4452	4563	1665	2548	5835	511
4970	8217	3634	5672	11344	4525	7909	7562	4375	14223	7556	15563	13812	5692	2810	14848	5038	7616	13861	7692	10741	5516	8417	6005	7445	7879	6913	8597	13106	18767	8310	7137	14112	12519	6121	5103	9041	3674	1426	2734	6281	6647	12520	6196	1888	14848	3587	5963	2721	3127
1321	1419	1309	2234	3553	472	1276	2333	3108	1725	2220	5998	9843	2475	4508	2677	998	2540	2188	1187	8341	1762	3430	2940	1690	1473	3184	2702	2621	12153	2440	1938	2323	2374	1879	960	2347	637	3221	3037	3450	3945	4450	5388	2937	3861	1171	1067	3894	139
44	15	2	75	117	91	36	73	39	34	2	137	193	92	49	100	25	366	938	49	125	76	448	49	35	28	55	169	54	900	19	11	111	344	217	37	193	7	7	16	121	53	144	284	5	20	5	15	18	2
610	630	109	366	523	948	524	231	1127	1055	252	935	367	827	119	1066	627	427	1313	941	183	258	158	319	698	531	1099	178	424	430	527	135	1794	946	728	560	1391	293	435	273	554	1065	450	551	754	669	549	162	1007	406
2055	3180	939	2257	5334	1285	5839	2327	1944	7472	1950	4277	3741	1657	1570	3208	1658	3372	3745	2162	5049	1385	3673	3129	2350	2276	2195	2667	5960	5251	4122	2394	4738	4698	1787	1905	3113	1236	988	1863	2051	2696	6027	1566	889	5989	1909	2655	938	3700
170	81	70	351	236	173	121	1523	202	111	1048	732	767	127	15	438	182	132	1001	154	346	111	10664	203	139	164	643	319	212	1069	2180	203	287	556	46	97	178	67	200	176	270	193	431	242	403	503	35	118	405	200
733	1418	366	989	2391	527	2191	2228	1497	2493	1609	4490	2434	662	738	1681	892	833	2931	1340	1477	815	1640	1630	1100	1403	2153	1080	2949	1754	2874	713	2349	2091	914	816	825	515	776	1739	931	1432	2433	932	842	2970	769	1848	1538	1174
19	185	6	5	28	262	27	17	7	3	5	24	170	33	2	19	10	216	52	12	824	14	1354	4	101	28	11	5	196	19	32	147	25	481	8	6	30	59	224	2	9	10	20	2473	10	6	4	7	98	1
265	459	152	336	734	225	607	2184	615	1356	257	3127	1598	96	378	673	411	331	233	554	1291	296	340	788	442	154	627	488	790	1026	1259	826	1237	1418	621	294	882	252	105	855	900	545	949	518	170	783	275	1458	422	262
1524	2682	2026	1595	3486	2183	6468	4092	2728	8520	3209	7313	6430	2277	904	8799	2374	3049	3582	1903	5846	1814	2935	2596	3593	3849	2936	3017	4539	11988	3015	3271	6581	6515	2399	2539	3972	1825	649	922	1934	3117	8603	2879	741	5169	1330	3087	1163	3371
753	454	100	577	405	2528	308	159	841	157	304	399	530	117	359	664	316	310	1137	110	1159	598	2227	75	788	133	557	197	251	665	166	204	1458	757	877	220	505	591	285	149	224	186	1052	1018	180	1133	29	176	276	117
1474	2083	529	1529	2691	1270	894	1359	2028	2630	971	3687	3434	1424	1246	874	1283	1871	4549	1258	1425	1388	2055	720	1628	1163	3005	1738	1959	1874	1612	828	3894	3443	1589	1362	1264	774	539	969	1686	2339	1857	2421	514	3358	300	1900	1336	570
3519	13927	3296	1561	9877	3387	24234	23153	2469	6969	1808	9143	9057	3060	4659	8363	7182	7927	4080	9988	4684	2599	8141	10203	5241	2993	3935	10734	10589	11024	11772	2613	22366	6750	11986	8791	20535	1678	420	2203	2776	7716	16597	3368	439	5534	3160	5097	556	12857
36	385	51	30	190	153	400	531	143	423	150	75	215	38	31	1268	153	430	309	157	1848	171	1079	92	48	43	165	245	89	525	191	96	691	289	159	154	2742	117	17	39	92	384	36	285	5	51	90	104	26	63
1493	9379	1841	3298	4111	4076	13330	11580	3769	17633	3306	21287	8224	2516	1556	13674	3266	3449	4865	3215	4393	2771	2280	2651	4114	4488	3256	5346	8303	12667	8660	4961	10911	9212	4782	3105	4988	3722	603	5435	2645	3768	9588	3103	1649	5619	1997	14501	1482	1827
0	0	0	0	0	0	0	0	0	0	0	0	0	0	0	1	0	1	0	0	0	0	1	0	1	0	0	0	1	0	0	0	0	0	0	0	0	0	0	0	0	0	0	0	0	0	0	0	0	0
159	17	52	176	72	4	52	28	36	32	12	88	102	4	24	4	10	2	216	0	8	25	1	1	60	5	6	25	18	30	10	16	25	96	49	38	9	257	145	7	28	59	16	6	7	45	4	1	65	7
567	124	11	125	164	69	72	57	726	50	27	339	441	58	337	84	23	223	149	9	53	51	462	95	213	30	63	34	109	21	176	408	48	40	87	21	76	1493	190	51	84	77	22	152	32	71	374	71	102	11
1609	4742	3153	2121	2991	2098	2745	3031	2366	6434	5486	5903	2888	2572	1011	10894	1521	3104	2962	1329	3796	1522	1248	1505	2384	4979	2337	1971	4060	4077	1971	2369	4654	5687	2553	2138	2561	3043	625	1112	1624	2226	3890	1875	587	5249	1813	3491	1016	2020
283	194	137	381	515	95	312	178	518	949	223	808	163	585	111	420	194	534	677	423	483	203	524	98	260	515	1263	140	535	582	254	162	426	479	145	204	671	283	128	289	231	779	399	433	127	741	60	540	366	172
1221	1652	521	1637	2516	725	2651	3623	4005	5886	1609	3288	2361	845	1212	2627	2374	3024	1695	3426	2102	2014	1157	1251	2059	874	4009	1682	2469	3760	2257	1142	6865	3967	2412	2238	1632	763	1024	1347	1664	2592	2412	1403	644	3692	586	3279	1413	1220
1289	3458	1565	1241	3605	1791	1754	2530	1580	2636	3241	4752	3723	3043	1176	3555	936	3037	5929	1976	4368	1651	4112	1439	2190	1231	1663	1649	5696	6345	3186	2432	2224	3465	1022	765	2287	730	1378	1485	1523	1643	5731	3341	2065	3188	1517	2621	1137	835
3167	3166	2231	3195	4875	2331	1891	3165	6303	9327	9183	9228	6269	4093	1849	7158	2442	4446	9327	3710	5850	2592	4856	2394	4438	5189	6645	3717	11860	11692	4590	3174	6275	6521	3246	2581	3701	3042	3712	3577	4224	4000	9896	5831	4070	9409	1732	4085	7415	805
74	42	14	85	246	14	65	528	128	2458	0	1294	363	51	167	20	143	90	41	35	1922	138	26	30	223	2175	112	127	544	576	822	100	329	282	182	130	573	585	13	237	469	495	307	6962	24	113	156	896	745	9
1836	2332	1165	2780	4256	2853	2847	2531	3191	7711	2849	5422	5154	2298	1707	5841	2333	3947	8151	3797	5985	2007	3191	2587	3148	4678	4336	2716	4291	4146	4479	2548	5720	5176	2551	2139	2643	1538	1682	2373	1844	2956	5220	2782	3916	6735	1348	2989	4548	1209
724	1057	256	887	1537	609	1167	1320	1562	2449	1740	2528	2143	620	408	1161	684	894	1651	946	1207	761	797	743	1081	819	1321	808	1493	1189	1028	672	1750	2255	768	706	597	596	791	1327	881	963	1367	813	626	1982	498	1358	908	606
3625	2585	787	1259	5326	230	961	2481	2890	2351	403	5448	7265	1120	1391	341	1687	933	1200	257	3410	3130	775	1940	3459	822	1950	1868	2481	2109	451	1462	3668	2093	2043	1945	5330	539	347	1625	2434	2989	1935	2108	139	2657	1533	10057	812	794
2894	2406	1838	3283	6587	2461	2962	4365	6032	13177	2741	9295	7328	3107	1439	5968	2943	6500	9443	4045	6794	1231	3476	3543	4558	13504	4802	3221	5026	9646	3848	3022	8585	8727	3295	3586	5504	2219	3570	2496	4715	2918	4870	2369	2198	8714	1438	4351	5352	3138
1143	909	844	1697	1901	1286	1531	1384	2813	3089	1880	5105	2909	1124	867	2069	1521	1427	4083	1722	1927	894	1639	1010	1742	2557	3387	1357	2760	2774	1531	1137	4231	3360	1441	1473	2773	1223	2688	1687	1992	1447	1931	949	2025	2487	541	2514	3104	475
1780	4393	1220	1889	3922	1739	6731	5841	3663	18509	4255	10075	4176	1771	1189	6436	2693	7478	18759	2810	6631	1967	4082	3330	4726	3724	3181	4556	4195	6654	4733	2128	6918	7761	2831	3158	7427	2178	1398	2242	2129	2887	9771	1842	1872	9553	2476	2923	3585	6285
1713	2799	2932	1674	3402	1128	1620	2955	1443	3624	1863	6887	3295	2819	1516	5304	1587	3581	5983	2677	3300	2565	2238	3758	2656	3133	3148	2311	5967	4435	4018	2152	3702	3978	1809	1710	2489	1351	420	871	2444	3190	6657	2429	568	5369	1071	4421	1020	1170
2401	3783	2135	3223	6205	3331	11370	3883	2156	13279	1901	8839	7407	3024	1711	8148	3028	2966	5701	3655	6504	2860	4035	4934	4480	7311	2980	4705	5661	6154	7214	3185	8696	7856	3406	4377	5372	2233	516	1120	2140	5216	8755	2399	930	7632	2179	6135	772	11993
51	37	783	27	64	6	58	22	333	847	382	804	36	40	28	519	203	671	2087	764	274	57	29	170	92	333	212	60	36	86	86	21	910	355	166	480	1251	25	308	174	78	470	35	402	124	365	14	1129	481	445
27	22	7	53	29	0	307	28	15	121	4	402	39	122	3	5	156	34	131	11	70	36	19	100	46	7	221	24	31	58	107	17	483	39	67	263	10	23	14	71	42	62	99	25	6	73	0	117	10	25
4744	9471	3123	4354	9907	3634	7761	13077	6007	11843	7715	21671	10588	5753	3593	9164	4576	8561	11107	5137	17727	4428	8135	8036	6457	5715	5179	6779	10954	8246	9399	8417	13403	12540	5455	5508	6034	3247	2946	3911	6628	6327	13092	4407	4542	11730	3498	4809	4377	6152
978	1709	1196	1718	2780	637	1147	2920	2876	2608	2163	2951	3111	1573	1913	3337	978	1216	6186	1714	2980	1142	1531	1334	1496	1169	4131	2087	3999	2890	3450	2174	2827	1703	1246	1067	1038	728	3144	3669	1964	2333	4241	2069	3245	4010	749	1679	4797	207
3	6	1	19	19	2	9	2	17	18	0	25	18	13	22	11	12	9	8	0	4	4	20	6	10	8	7	5	16	12	23	4	16	5	8	6	5	1	6	1	5	37	1	23	0	8	4	16	3	9
22	7	0	5	22	2	11	2	12	13	0	21	4	7	1	2	3	4	7	1	0	1	0	0	8	2	2	4	3	9	2	0	5	0	2	1	8	0	6	3	8	12	3	9	0	8	2	0	3	3
428	1036	376	445	899	303	335	758	1238	1214	1054	1126	1012	491	323	1078	440	664	1679	776	1536	480	725	271	721	1138	885	453	1101	1186	658	541	1240	930	605	427	759	341	1114	1123	565	644	995	818	943	1690	394	505	1179	206
2937	4016	2441	4792	5138	3513	5238	6198	4888	10613	4218	10026	6345	3728	1398	7345	2503	5689	12759	3919	10098	3232	4450	4617	4204	4834	4159	3772	8843	6992	2799	4757	6333	7527	2960	2920	4036	2297	2895	3281	3196	2936	6017	2229	3584	8431	1699	2888	4638	3328
187	575	213	175	320	131	378	234	290	1019	620	618	330	192	99	735	147	264	535	313	900	210	250	279	290	440	230	193	264	518	407	367	323	568	142	148	798	106	120	160	196	257	370	250	266	600	314	327	113	523
3	0	5	1	0	0	0	0	28	8	33	5	0	0	1	1269	1	5	2	2	101	0	1	1	1	3	0	1	0	1	5	0	2	35	65	0	67	0	3	3	1	2	1	24	2	3	4	5	71	4
5	2	60	1	4	1	6	2	10	4	0	7	2	1	49	1	1	6	0	2	9	23	2	3	6	2	6	8	9	2	0	5	14	7	6	2	12	2	2	0	8	6	15	183	0	2	0	4	1	2
1078	576	149	464	1441	368	512	200	2185	2346	1127	1829	444	1079	169	478	351	1194	1732	511	365	356	420	782	814	1308	381	417	870	1052	1291	423	1013	1919	508	751	1082	340	580	619	671	1573	854	1239	110	2346	262	859	993	420
1396	1749	1253	1891	3193	2414	4575	2331	1548	2976	1907	4162	4382	1249	859	4645	1766	3680	3165	1004	6575	1533	1994	1449	2247	3330	2314	2067	2540	5398	2715	2698	5168	3963	1779	2226	2779	1432	854	839	2347	2669	3298	1720	673	4092	1365	1586	981	3414
101	2333	125	115	194	87	164	841	577	247	122	971	249	392	185	679	171	438	787	473	713	190	169	123	274	304	1220	153	1626	522	831	223	425	553	157	170	1086	211	393	1392	216	533	363	476	3617	595	220	401	452	127
933	1371	301	682	2342	989	768	977	1626	1782	817	1269	2809	1046	369	781	782	1301	5737	942	591	1117	1907	732	1249	1121	2280	743	1806	1151	1165	568	2405	1496	1391	868	996	556	264	507	726	1080	919	1066	385	1332	272	1368	987	442
92	284	339	414	1105	173	230	1250	732	3983	57	1516	1046	78	264	1322	116	457	778	790	629	910	202	203	1069	213	93	416	1257	1675	918	1093	516	664	489	96	38	466	96	486	1861	364	817	484	135	102	660	2010	145	28
2148	1457	1394	6194	2085	8129	3330	1261	2436	3940	26584	5393	3312	5255	790	5500	1962	1039	31263	1448	3017	2071	2837	4366	4324	3214	2085	2122	4698	5086	1544	1948	4941	37054	2016	1638	1105	1951	3712	1686	1750	2000	4305	1571	1753	13780	1670	3875	21784	12396
1	0	0	7	74	10	1334	0	148	11	9	5	105	0	5	18858	118	3936	0	0	85	93	1739	0	10	19	763	22	0	12234	0	16	1359	10	2	7	20	2	9	7	4	80	1	1	0	0	146	2	2	2
3394	8376	3922	6365	5661	1698	7395	5905	5186	18123	5058	10600	8689	3533	5233	9395	2436	5867	15249	4280	3918	1875	4029	3193	5783	4529	9985	2359	7815	6805	10577	5380	7415	7237	2334	2500	5403	1749	2007	4386	3244	4410	6139	2210	2860	11839	1844	5883	5320	3722
612	571	61	482	833	2683	1161	358	229	143	525	356	828	97	559	2923	260	3286	16766	731	93	571	5029	24	354	1410	477	1189	111	52	32	119	481	3784	439	70	627	277	79	58	149	218	216	201	455	151	164	201	648	113
0	6	1	0	2	1	21	0	3	18	11	7	3	8	1	26	3	9	4	34	79	0	2	7	4	12	8	7	3	2	4	5	14	9	1	5	52	2	9	4	1	13	1	6	25	5	1	8	7	20
4	3	62	1	30	10	2	4	4	13	0	19	6	89	792	13	6	244	5	23	65	3	4	21	7	1	6	5	16	202	69	65	31	11	13	4	21	9	5	0	18	7	22	11	1	12	10	10	7	3
8840	12643	5784	15248	17390	6163	10251	15289	18840	21115	9563	24929	23933	10315	5591	30862	5564	21706	48423	12834	16342	9929	9948	6592	16366	16516	17845	12343	15515	31578	19795	11382	13162	16564	7532	6414	12863	6268	14846	10177	8441	10227	30345	8141	11505	23157	7325	6956	39582	3360
3039	1414	282	1803	2303	1482	1715	1637	1486	2015	1706	5091	1994	874	521	544	765	2507	1388	721	5754	562	2302	1643	3275	1232	936	1752	810	2219	449	2232	2062	2303	313	726	1816	953	1130	382	4590	1068	1986	588	220	6260	1009	491	971	2783
878	1073	1131	1203	2448	1158	1500	1580	3598	3578	1734	3773	2967	1071	611	2566	1207	2365	8262	1699	2759	1266	2340	1056	1602	2634	2908	1286	2367	2080	2011	1630	3065	3358	1227	1167	2320	697	2661	2812	1694	1287	2014	1213	3927	3446	578	1795	5567	953
1043	145	881	602	540	1184	1087	221	483	1090	2403	768	936	177	179	76	563	4910	3015	593	462	203	575	294	882	2053	1109	355	760	678	348	669	1296	793	733	629	244	234	442	396	472	553	280	486	170	1155	165	342	1073	361
1186	1790	1050	1285	2640	1680	1669	1393	2208	3455	1667	3720	3219	1865	1493	1312	1219	1781	3958	1104	2762	1026	1149	1910	1917	2820	2947	1575	4723	4593	1755	1661	3312	3090	1502	1080	4187	1024	1238	1078	2201	2166	3462	2857	1349	3130	1140	1835	2063	470
942	2269	1180	1112	2007	571	1558	2868	1633	4162	1043	4110	2556	1657	1340	8600	719	5117	7171	2426	3436	844	2495	1701	2134	1488	1272	1519	4278	3764	2274	1622	2532	2423	1205	979	2237	736	1417	1682	1403	1424	4502	1775	2672	3525	1264	1602	3001	977
832	4909	1390	805	1653	644	2247	1986	771	1455	1717	4406	1576	1245	285	1148	1078	2812	2140	665	1601	761	459	1931	1528	2139	2079	1857	2188	2678	2204	1314	2047	1531	1061	1044	787	480	618	1620	1174	1234	4222	1457	646	3467	457	2908	1129	1278
2033	611	2740	2247	3657	2662	5166	2475	2072	4195	2548	4100	3188	2027	733	5478	1918	5923	4096	1369	3857	2187	2752	2252	3754	3531	2715	1581	3114	7363	1771	2203	4584	10280	1881	2308	8002	1306	1059	1062	1986	2367	5603	1344	1049	4252	1123	2114	1796	3722
2966	4141	966	10853	11852	64534	3175	19257	3674	5709	28258	11724	17113	11507	496	7856	5805	34047	21037	6623	7152	4753	77115	3935	14758	13250	4760	15760	2925	16449	6438	7287	18123	50539	7691	6470	6648	2237	3606	1576	10423	3205	12376	2907	6768	10435	2341	5231	73700	1273
1027	687	148	832	1036	3256	1377	440	1237	837	2045	1239	2077	304	68	217	1305	1188	3678	369	963	2428	916	345	1413	927	1847	752	1182	632	1483	1003	3378	4206	1926	1395	656	1396	673	662	578	980	728	493	284	1504	264	306	1271	649
13595	20082	15448	18308	29719	12293	12785	15747	14954	51568	21935	26093	28319	19256	10954	34602	7042	23085	57591	18551	22375	24301	23914	10999	21019	24285	16361	14997	26875	71364	14988	21847	18375	32735	10287	7554	13319	10448	4720	6274	16604	16638	33333	24805	5252	46839	10798	15713	19696	3574
1946	2115	1331	2014	3497	2658	4429	2442	2823	5694	4368	5752	2801	2594	854	2493	2419	5749	6877	1865	5930	982	3402	2374	2293	4714	3051	2170	3403	7215	2792	2068	6842	4994	1907	2378	4078	1892	1527	1210	1325	2486	4298	1408	910	6848	1503	1378	1998	4027
822	644	48	266	451	423	216	88	14758	561	201	338	30	617	313	95	1343	49	1013	27	248	336	18	102	505	403	870	427	422	171	294	43	2662	940	1226	979	163	25	263	326	708	1302	55	963	14	568	60	5726	276	176
13	8	3	10	10	14	36	9	89	158	3	17	15	1	116	4	12	32	18	110	862	295	8	6	32	12	17	12	101	70	6	1	40	214	12	11	840	57	4	16	22	91	14	51	1	11	12	100	13	3
629	735	439	439	2132	195	1567	539	920	2602	1257	1794	1507	1063	929	1077	1753	534	872	1333	825	546	603	783	884	836	1069	441	2817	2474	890	669	7728	1521	2481	1520	1080	298	124	266	659	2238	2504	3465	247	656	268	1050	194	66
667	578	1081	1495	2231	440	2079	2784	1126	3876	1681	3614	3086	1966	970	4913	701	1738	3475	978	2134	1069	2829	1777	1692	2022	1437	1230	4142	3310	2857	1155	1871	2676	942	724	1308	674	387	1079	1703	1750	1978	1719	815	2527	565	2190	796	679
5918	4571	768	20996	13964	3826	5361	4376	5906	23713	8488	18645	33988	4355	4953	2154	10179	10396	20387	1551	7841	3191	27384	7545	9413	11815	6795	8819	8145	15325	6417	7249	18387	14603	10484	10273	7358	5437	1495	2587	5335	6004	14068	5122	2065	13517	4610	7282	2229	4177
0	7	0	1	8	2	34	12	4	14	1	24	2	6	2	13	3	3	7	6	17	2	20	11	13	7	5	5	13	5	14	6	10	8	4	4	11	2	2	3	7	4	6	6	2	11	10	0	2	86
620	1030	496	690	1402	433	928	1628	1131	1786	1651	1636	1651	738	477	996	570	1128	1947	708	1562	990	976	273	779	767	1382	936	1236	1300	1002	690	1735	1626	634	610	1165	405	646	1136	814	757	1485	981	700	2590	678	1250	776	647
1094	1799	631	1621	2599	1071	1163	2461	2187	3663	1572	2981	4824	1010	991	2135	810	1512	5667	1200	2453	1178	1949	1305	1660	1177	2442	2118	3495	3257	1792	2232	2142	2024	1067	793	2089	841	2221	1446	1517	1588	2692	2168	2663	3519	724	1354	4236	359
705	1891	841	1062	1517	1460	1717	1764	1074	2174	2512	3319	2248	1596	512	3793	499	3343	10177	1116	4060	987	2597	777	1174	1983	1026	1157	2277	3148	1432	2735	1304	2324	809	625	3830	874	1288	623	769	974	2395	1196	1524	2538	435	742	2435	763
126	185	317	70	120	58	189	246	167	907	258	265	325	121	17	210	218	1165	211	80	70	37	369	49	180	135	413	114	127	1393	573	12	816	855	161	131	706	80	199	162	232	178	66	237	171	608	99	226	347	163
697	881	852	1059	1383	360	1036	1514	1484	4091	1992	2964	1692	1416	1471	2646	951	1416	2577	1145	969	741	2844	580	1183	1244	1865	663	3051	2386	3038	1092	4152	2332	1077	1419	1356	548	351	943	979	3073	1260	3133	293	1736	426	2563	472	152
267	463	534	375	832	221	574	744	597	1756	687	1031	611	720	330	1463	300	664	623	270	623	399	2536	356	407	522	413	328	1573	1335	1190	371	1403	1001	405	501	863	256	174	332	374	1315	514	1536	251	966	170	998	166	309
1146	1462	1551	2812	1260	410	1014	552	2439	7418	1494	1944	4212	1790	2142	166	1363	1025	1907	1337	506	815	526	342	1738	1234	7450	728	480	4881	3044	883	2097	2537	674	1241	1624	872	871	718	1418	2782	1013	1917	1354	3098	1007	1464	1999	584
1330	2575	958	1235	2613	1000	2528	1782	3031	12433	1575	3176	2899	1964	1414	3359	1967	3508	12051	2354	1986	1140	3670	1326	3043	3981	3907	2575	2524	2913	2192	810	4638	3152	1734	2242	5526	1279	1481	1433	867	3999	6183	3116	1354	5962	1183	2290	3973	1452
3019	5250	4837	4851	9304	2009	4969	5480	3080	12527	6126	6340	15072	3649	3740	10348	1183	6766	12895	2899	15073	4457	5111	3645	7329	4893	1464	4802	10822	11076	9039	9308	2810	6384	1966	1148	4378	3871	1647	2026	4879	3668	15519	3350	1715	11483	3569	3830	4444	1543
784	3494	499	483	4021	882	4340	749	1693	4801	496	1705	1709	955	2455	3124	908	1822	5193	1337	4591	1025	4672	3360	1251	1096	1247	1633	5131	2390	5926	2355	3142	2744	1288	1303	4023	579	468	1141	977	4542	2935	2171	1230	2728	2612	2092	977	3133
335	859	267	676	945	287	501	1126	758	1390	1205	1211	1627	808	568	2392	382	1146	3094	2651	1192	454	932	397	580	791	1089	486	1279	1357	1025	376	1056	853	502	307	475	330	867	881	543	940	847	866	660	2675	320	980	1066	302
949	803	453	1530	1350	1283	1193	646	948	1247	395	2262	1381	1139	469	1237	802	6759	3619	510	2305	1242	14789	577	1295	1285	3252	952	1621	3683	687	880	2013	1113	553	1066	3466	765	796	1012	708	1209	2084	601	786	2531	351	1523	1704	1182
1088	1712	550	1329	1769	1266	3076	1388	1591	2868	4214	4251	1949	1232	589	3059	1394	2551	2613	1155	3156	779	1932	1175	1331	1767	2549	1397	1462	3455	1810	1598	3397	2171	1157	1529	1867	893	876	873	1042	1427	3525	659	668	2658	1045	622	1166	2032
221	289	451	440	794	362	330	296	402	545	294	572	547	331	511	653	252	1437	911	200	1200	333	815	296	422	482	647	281	477	1068	402	635	632	628	342	224	630	200	326	295	316	386	645	407	293	728	367	167	301	257
3534	727	203	6600	2960	1791	2528	347	1700	2161	15552	5437	2639	1075	1033	577	2724	8844	10495	1777	30447	1197	2050	844	2078	2467	14246	2228	2243	3309	785	1479	8169	9125	1717	2727	6521	1874	2371	2700	1306	2131	7622	1706	1898	2527	336	6148	5057	783
127	198	58	147	274	75	165	36	150	102	34	191	163	69	141	65	117	113	138	45	120	36	99	124	124	90	94	162	586	136	351	162	342	311	254	78	69	200	272	76	896	252	131	553	117	345	9	293	213	19
1036	1327	1718	940	2253	295	1320	1965	689	1361	991	2395	2327	1150	795	1948	1034	1186	3552	1385	939	1147	2079	973	1403	1024	1963	1009	2060	2848	2503	1250	2362	1365	962	837	1067	623	251	366	1048	1710	1389	1999	571	1719	291	1655	612	215
3865	3218	3270	6554	13272	8363	2260	7635	8542	9364	19924	6229	9220	4966	5792	3807	5918	8504	17981	5390	17154	7072	8840	6049	11671	6913	13684	7432	11730	9978	7517	8038	17311	10358	7599	4633	7349	3892	3364	2044	5053	6733	17234	5779	5778	6139	5549	3726	7600	2836
94	24	441	148	441	280	137	240	175	864	22	60	188	710	172	431	57	2369	744	298	147	117	1116	247	413	1145	102	84	130	1368	441	513	228	638	127	68	1202	33	213	192	157	326	73	169	650	649	360	273	924	169
13400	13743	4947	10396	19604	9669	12862	20214	11484	29811	29941	43341	18999	14806	3831	24249	12009	18556	40779	5713	13315	4010	7023	17270	16563	15047	11825	13400	26542	34323	13673	13726	27082	18490	9227	11913	11737	5285	1522	5295	8622	11596	45378	4846	2731	32553	5484	13828	3987	25618
0	0	0	1	2	0	0	1	1	0	1	2	1	0	1	1	1	0	10	0	1	0	0	0	1	0	1	2	1	0	1	1	0	2	1	0	0	0	1	0	0	0	1	0	1	5	0	0	2	0
1929	4235	1674	2182	6442	1962	2873	5357	2435	7972	2902	5420	5493	2601	2285	6005	1792	3640	6958	2843	7949	1990	4025	3821	3016	3144	2224	2784	6692	7957	5687	3190	4423	4190	1848	1593	3948	1725	1108	1371	1994	3661	6674	2234	1217	5675	3841	2490	1319	2178
1574	1600	733	1417	3570	626	2100	2478	1787	9566	2890	6886	2546	3712	2550	4652	1851	2331	5594	3398	1947	1453	3860	1342	2126	2550	4617	2301	5635	4295	2685	974	5113	3056	1678	2163	3240	744	524	1233	1630	4067	5829	4444	588	4115	360	4338	1246	279
610	1063	400	1117	2355	550	673	864	1692	1704	633	1897	1887	1924	1370	1141	684	1447	2481	1178	679	1525	2595	380	1773	1183	3522	877	1958	3602	1312	682	1138	1451	612	549	722	400	804	958	1003	999	2400	1104	1441	3485	96	1462	2762	200
1	1	1	3	4	0	1	1	7	18	0	0	0	7	5	0	0	6	3	0	2	0	0	0	4	3	1	0	3	0	0	0	7	3	0	11	5	0	0	0	5	6	1	0	1	6	4	0	1	0
450	459	291	576	1113	681	581	837	998	1421	355	1910	2314	634	464	2916	552	763	1701	954	640	484	1000	850	1125	1000	1097	588	1351	1947	1196	838	1630	2010	733	604	522	370	475	721	530	1171	1506	1014	411	2386	296	1040	1677	325
1643	460	976	2905	5913	1920	4902	6413	4619	5890	4917	4863	15791	610	2469	12200	2924	1634	1248	3972	2775	6238	4219	4940	5326	482	4754	6090	8443	18719	3555	3015	10252	6135	4837	3399	1893	1555	324	1674	4863	6291	6799	2194	1475	3779	311	5098	899	401
1220	1049	893	1260	2069	1483	1517	1280	2691	3464	2683	3823	2009	1485	716	3260	936	2420	6958	2197	2785	1247	1330	1201	1706	1965	2373	1094	2915	3539	1646	2058	2461	2494	1097	814	3315	854	2532	1579	1651	1524	2400	1701	3075	4116	683	1174	4592	636
11	122	1965	9	56	8	41	2	3	11	1	51	198	0	102	3	15	3	15	3	15	19	2	351	16	9	54	16	1	1368	14	2	51	29	60	5	6	105	7	2	13	10	4	29	48	6	44	38	49	8
65	1890	450	1041	297	9399	1218	37	534	2015	213	1185	4257	308	28	333	18	4223	668	971	1999	48	551	278	5850	3141	17	1707	27858	1441	432	5127	27	55561	16	22	818	22615	1680	139	18	10	6448	275	1195	2478	292	486	574	439
860	2110	892	1225	2300	1801	2153	2169	1617	3178	3579	3394	2378	1269	575	5624	812	2229	4035	1986	4082	1510	1428	1825	1828	1538	1198	979	1825	2765	1635	1868	2487	3631	1255	1352	4980	807	653	804	1293	1516	2912	1212	476	2491	1136	1326	1150	3659
699	1240	2367	1137	1536	438	887	1474	3963	2771	310	3868	1790	661	1460	1056	1121	436	2310	2191	2042	860	887	880	1666	1508	3994	947	1838	1273	1870	588	2699	1496	892	1155	1120	537	1618	5020	1086	1575	2031	1423	1577	2758	814	3076	2323	467
946	1281	413	1288	3143	605	1201	1056	2530	2471	1135	4474	4213	1788	1205	2931	1332	1245	2744	1093	1558	1911	2502	1925	1456	2008	3973	1488	2586	3576	2295	1249	3650	3245	1627	1274	1168	605	1007	2014	1708	3058	2508	2390	1346	3115	358	2539	1072	284
3022	8349	105	4033	4736	1704	2389	298	1624	1880	17054	75195	9913	902	1268	283	809	3044	12940	1853	2035	640	590	441	10732	4766	5567	3505	10024	1024	2288	1458	2058	6137	2177	2863	2341	2689	1784	5008	2358	5793	27284	910	577	12756	617	2083	3736	11851
2612	3736	1466	2709	5524	1827	2349	4775	3337	13044	4227	8184	3976	3793	2561	3182	3486	3245	7706	2022	5589	2624	5270	2302	3912	3567	4494	3506	18447	8197	4900	2700	11799	7319	4384	4403	3300	2215	925	1641	3267	6789	6961	3551	790	6436	1282	4631	1717	844
334	362	217	1016	528	373	327	363	248	840	174	828	1362	217	367	272	222	727	585	83	306	158	429	233	562	364	331	956	697	641	650	1004	836	1213	382	282	317	1058	113	109	476	488	961	630	99	738	79	306	238	79
186	217	55	407	284	347	283	200	632	451	6	452	502	116	77	46	258	172	92	36	513	210	105	186	455	110	319	617	502	252	459	273	1591	1024	519	700	71	395	75	129	241	518	269	205	80	489	37	126	109	395
0	0	0	0	0	0	0	0	0	0	0	0	0	0	0	0	0	1	0	0	0	0	0	0	0	0	0	0	0	0	0	0	1	1	0	1	0	0	2	0	0	0	1	0	0	0	0	0	0	1
219	560	245	665	560	142	294	202	1271	517	131	998	398	977	522	4879	60	708	1173	1770	938	213	332	268	494	828	146	245	1709	678	273	363	148	1590	103	35	1060	189	1805	737	366	399	1341	521	1162	1405	378	477	3220	109
4407	8860	5272	7593	9787	8207	9254	16224	8555	18359	12208	18657	15888	11901	3758	18775	5384	16840	14967	6944	11463	5464	18969	8153	11647	10649	6553	10233	12692	29452	13930	11218	13463	18824	5675	4969	8843	4988	4286	4577	10172	4869	18120	6527	9214	13225	6287	8220	10977	5337
1126	2111	2152	2447	4293	2213	1510	2725	2534	7855	5119	6036	5105	3372	1856	5887	1227	5143	6753	1462	6035	2450	9438	1391	2791	5429	3714	2089	3173	7331	3480	3756	2969	3139	1457	1064	3744	1068	3718	3068	6678	2092	6875	2249	4168	6872	1736	1140	11552	601
708	515	568	1026	734	653	904	533	969	3186	226	3374	801	502	266	964	635	837	817	970	415	260	437	778	1113	425	873	665	1956	835	795	844	2085	2706	608	650	594	501	512	650	290	609	831	540	582	1667	549	461	1661	464
900	1582	1213	1166	2076	973	1726	1348	966	4586	1264	3903	2085	2096	2191	3291	1180	2941	3963	1615	3477	835	2522	2176	1203	2228	1504	1557	2782	3715	2080	1056	3676	2329	1537	1396	2053	670	374	580	850	2626	4634	2397	520	3074	1610	2262	803	1403
1355	1632	364	974	2988	353	1341	1099	1404	5542	2004	3219	2399	2087	1452	3413	1267	2521	3111	999	1797	954	1496	1158	1956	3738	1847	1132	4251	2987	2439	960	4233	2036	1967	1924	9658	698	352	596	1890	5346	3295	5327	277	2533	635	3015	654	414
803	1738	994	1190	2412	1049	5016	3111	1772	15187	1459	3854	2012	1321	1131	2145	1495	3539	3556	1024	4185	1213	3417	2022	2218	2654	2038	1425	2886	3379	1930	1764	4333	3182	1632	1765	3124	949	761	882	3044	2782	2969	2276	628	3580	1542	1158	665	5337
1466	242	24	6823	5258	5420	5148	554	2464	22407	917	11875	5897	3624	864	506	401	66911	52350	3720	2168	6214	32685	50	8802	5066	919	1851	28517	11941	374	2703	1498	11034	3838	858	4804	6818	1034	1406	1365	1091	22009	1262	1379	8581	293	4264	8867	727
1	4	0	1	2	0	1	0	0	5	0	2	1	0	2	1	5	2	2	0	2	0	0	2	0	1	5	3	1	1	0	3	6	3	1	1	1	6	2	0	0	4	2	0	3	1	2	0	4	1
3326	4464	1373	2750	5658	2335	5516	6891	4223	9943	5463	9498	5181	3468	2046	4310	2888	4869	6886	2906	9182	2415	3480	3539	4284	3970	5261	3968	5876	7369	4317	3581	8399	5875	3945	2986	3858	1588	2120	3413	3811	3781	6776	4081	2114	9753	3305	4889	3440	3728
344	1372	363	457	522	37	672	1778	1027	1359	752	1757	985	48	492	805	170	1352	1592	345	207	104	1080	404	634	421	503	150	1019	887	1208	113	461	485	264	94	232	270	277	608	277	274	1883	375	363	399	174	2248	713	30
57	233	120	89	284	76	393	353	174	233	326	279	115	178	80	160	136	187	54	136	342	133	207	189	105	106	118	238	263	349	184	140	358	319	171	141	247	89	104	67	118	136	269	92	45	120	83	145	20	61
4172	5702	3737	7537	11240	3782	2607	10921	4520	27319	4663	18205	10195	12902	3328	12567	3038	9434	17569	5026	15295	5152	8579	7568	6273	9811	7991	5843	8849	15168	6283	6960	7157	6545	3794	3428	7339	3327	1763	3129	5402	6557	15068	14212	1844	18775	4598	8533	5101	1913
77	531	9	294	153	4	112	919	637	84	115	2124	505	1837	1281	22	168	87	46	16	27	2025	54	131	169	1111	956	239	34	2516	274	945	1235	670	187	117	81	163	64	379	1288	350	638	181	7	460	14	85	103	178
1	8	5	12	10	14	13	5	13	10	14	9	2	7	1	13	2	6	78	23	11	4	13	5	4	26	18	6	58	7	30	8	20	39	8	6	23	7	11	9	2	14	15	15	24	53	14	7	7	98
1264	1649	1122	1512	2328	1183	2338	2556	1952	11294	1913	3575	3387	1505	1522	3485	1188	1924	7393	1451	2951	1366	948	2048	1977	1286	2306	1511	6437	3937	2556	1371	3164	3535	1251	1542	1728	1113	543	1856	1189	2212	3400	1908	753	3124	1190	3046	1445	552
2212	3130	1062	2536	5120	2227	4881	4503	2360	5825	4780	4766	4887	1967	1073	2973	2491	3224	7331	1893	5916	1669	2937	2387	3077	3193	4070	3930	4706	5562	3005	3170	5697	4186	2165	2608	2610	1642	1002	1285	2327	3146	5433	1620	1109	6194	1395	2215	2458	3017
3686	11095	11572	5653	8234	7895	12975	7300	17859	21802	6423	22494	7479	12974	8437	31488	3061	11611	14812	16930	10409	5569	10714	17029	8992	11164	10198	4860	18688	15847	13258	7125	10469	13645	3148	2891	15198	4304	9759	8376	7046	10493	10922	12942	13748	24863	10761	16306	18693	36871
1770	2436	3100	1463	2659	952	2901	3337	2937	5739	2341	5492	3058	1212	1040	4489	1630	4647	3150	2614	3293	1303	1125	2313	2727	2049	2658	1816	2564	4562	2414	2590	4064	4318	1660	1637	2453	1004	1213	1251	2017	2105	2767	1368	1238	4413	919	2413	2191	2061
497	1792	1035	653	1010	176	754	853	693	2256	1931	2328	1242	1702	487	2234	504	1406	3993	2800	2917	731	2444	474	1017	2171	1199	1247	1914	1380	1356	623	1270	1713	664	538	1417	494	325	461	976	1283	2414	1339	700	1577	212	921	579	104
0	16	3	0	2	4	130	0	4	32	1	5	2	12	2	10	16	2	3	0	9	4	7	9	1	0	8	5	19	10	19	3	17	8	29	11	7	2	0	2	3	18	1	203	2	1	5	21	0	85
12737	14428	5570	11328	35844	9321	13717	40184	13651	14334	32663	31559	28456	9347	6923	12984	7057	18214	20689	6626	39463	17913	17802	8947	14050	16086	14019	11872	19096	21414	9399	17745	19738	14547	11434	8592	7189	6884	5597	6586	13585	12166	23397	8606	5783	23341	5714	6503	7700	4958
43	24	162	29	120	13	72	33	105	168	34	98	132	19	37	39	192	371	108	41	34	24	46	54	115	81	172	68	87	109	357	67	791	77	323	169	237	14	15	61	122	261	47	65	11	80	146	107	27	89
548	837	1168	513	1394	197	286	823	484	1675	726	1382	1240	1481	1199	1793	434	1725	673	819	1142	526	2597	848	780	788	697	1495	1702	1972	1521	729	1498	932	564	626	840	477	90	189	639	1259	1321	1179	122	916	407	729	123	144
351	388	1146	471	1022	78	234	725	694	1178	502	901	1350	820	344	816	372	688	778	240	1891	493	847	313	456	618	1007	706	996	898	959	407	1019	748	402	334	369	232	251	316	707	960	723	795	185	613	211	655	396	53
23822	27933	38558	25575	55628	7886	13770	17738	47347	20740	43889	34629	40517	28514	33161	26275	10690	30191	59393	17960	58843	43905	47814	10712	23995	20427	40557	40017	30843	33916	24160	19228	29100	24154	17060	11448	15277	10034	49042	23993	22233	21035	62957	34887	55232	37156	8903	11616	48241	1155
340	408	693	566	423	72	117	102	660	325	201	2314	192	285	190	513	236	738	2028	341	701	319	91	400	505	917	441	99	792	1017	903	59	888	1468	856	227	557	172	221	635	337	377	1785	367	164	3671	286	1151	405	90
1118	2028	2556	1508	2744	358	1205	1401	2425	3409	1050	2384	2226	2441	3782	4002	821	1179	2824	2324	2396	1594	3119	574	2979	1847	3014	1905	3545	3473	2418	1188	1915	2821	1371	640	1501	968	1506	1524	1412	2016	4226	2777	1999	758	702	1495	4017	19
4227	5782	4698	4675	9592	1614	4105	6450	5352	13631	9415	11154	7582	12386	2984	10386	2928	8019	14271	7255	11392	5785	10472	4134	3326	6995	7384	4767	13120	19173	6100	3370	8092	8335	3886	3160	6898	2734	2673	3207	5415	6026	9548	7153	2837	10953	2636	5023	8277	558
4246	9123	11460	4454	7081	1692	1915	6088	5326	9574	6932	7422	8197	9079	4567	10263	3939	6230	8795	6658	6788	4750	9124	2883	5366	7068	7935	6767	9944	9585	3919	3395	11394	10467	4201	3604	5068	3136	1487	2266	5857	7084	9921	8497	2215	6316	1404	5116	4896	480
2078	3515	4227	2098	3280	1212	1810	5695	3538	4949	2290	7291	6848	2807	2042	4159	1864	3909	4701	1939	4785	2514	4240	5432	3170	3433	4423	3168	7042	4594	4518	1862	5392	5864	2245	1812	1820	1287	2308	2504	3433	3156	6028	2814	1674	4676	1806	4038	8286	533
0	1	0	1	6	7	7	1	0	9	10	5	0	3	1	15	0	3	2	2	1	3	14	1	5	5	9	0	72	5	19	5	2	6	2	0	4	4	7	3	1	84	4	7	11	30	1	10	7	51
0	1	1	0	0	0	0	0	2	0	0	2	0	0	0	0	0	0	0	0	1	0	2	0	0	0	0	0	2	0	3	0	0	0	0	1	0	0	1	0	0	0	2	0	0	1	0	1	0	1
1092	1572	771	1212	1802	823	1416	1814	892	5102	625	3410	1782	815	568	1531	605	762	1625	417	3531	1225	1589	1048	2047	1849	924	1438	1953	2274	1616	1544	1678	2333	769	686	2050	887	244	713	1792	1243	2387	1038	207	2298	1266	1703	427	831
1610	1985	742	1362	2562	899	1863	2568	1372	5558	2048	4512	1800	1687	615	4156	1069	1458	3406	1626	3982	1270	2166	1869	2054	4101	1881	1347	2963	2385	2190	810	3007	3919	1298	1184	4085	592	464	1270	1539	1928	4259	1510	647	4239	899	3572	1115	1578
1371	728	593	2317	1704	3820	1401	4003	1057	1966	3266	2048	2547	1485	1023	456	1526	2549	2432	1260	377	876	5250	1034	1203	1262	2242	3949	6742	17572	2406	3023	3991	9877	3416	1587	2239	2618	2844	608	2878	2657	6950	7390	2328	2100	240	2587	1529	113
220	663	320	235	574	126	273	462	456	806	249	641	354	388	507	599	194	351	432	604	447	353	298	320	341	320	653	486	526	670	1027	528	597	497	351	253	668	191	90	268	204	860	863	689	99	716	240	785	228	102
678	718	2212	1568	2074	389	1511	3545	2400	2870	436	5378	3464	1617	2380	3270	1665	988	5003	1730	2472	852	1827	2402	2185	1931	4271	1586	4436	3327	4196	1673	3865	2935	1449	1195	1257	587	962	3161	2541	2157	1905	3827	896	2627	461	4527	1447	158
2272	3208	815	2515	4214	1854	1953	3864	3104	6517	3216	5798	4969	2679	1542	7243	1548	5158	5663	2271	4046	3007	4678	2370	3085	4363	3333	2797	7346	7187	4679	4284	3996	4711	1916	1709	3422	1782	986	1690	3074	2765	5534	2407	1075	6076	2054	1938	2923	1089
1072	3276	1195	1573	1873	910	2062	1807	2724	4047	1954	3969	1176	1733	742	2888	1070	2123	2977	2403	1306	1336	2247	1186	2415	2014	2611	1002	3194	3236	2020	1083	2796	4083	1351	1290	1817	627	1024	1356	1521	2329	3520	1978	922	4096	711	3515	1963	1735
3640	8514	2162	4311	8356	409	8805	12626	3832	5652	127	27471	26730	8726	2221	16875	15024	612	2135	4045	22910	4887	43948	12974	6875	2256	12326	5312	11691	44917	15582	3375	41086	8014	8961	14998	2550	3020	924	3907	6595	8662	10822	5961	2711	23908	3008	7679	2060	7521
549	1601	373	879	1886	1156	689	654	729	2284	4856	1209	1254	1008	476	1533	467	2381	7504	610	1580	824	3908	556	896	1468	950	544	1288	1999	1075	1204	954	1723	499	431	1368	467	1807	678	1166	838	3363	553	1231	2336	720	666	2061	494
1755	3284	891	3140	3258	3778	1992	3821	4389	3671	5020	9085	13872	2740	1378	4264	2074	5724	9295	1038	9690	1162	8030	3846	3243	3452	4695	1846	2802	7611	3390	3640	4866	6537	4120	2306	5283	1498	4946	3551	11257	4209	4884	1372	6755	7931	1416	1998	4082	1097
171	619	6	248	329	86	286	124	338	141	1	1153	34	14	157	99	22	41	315	30	168	286	22	13	407	332	12	158	1029	244	97	83	64	167	124	47	16	49	8	290	165	108	1033	44	39	111	40	303	9	3
91	280	26	87	665	49	260	220	188	259	39	351	765	91	35	107	433	225	115	80	168	62	179	183	65	191	481	110	406	240	234	162	1567	200	955	281	256	112	75	229	340	242	181	135	70	457	116	116	83	142
58	31	7	25	105	8	54	19	168	186	6	182	56	78	33	23	114	64	95	36	20	22	50	51	43	74	809	33	55	137	70	33	206	69	63	151	63	19	49	74	54	582	28	245	20	141	14	117	43	30
382	227	160	858	406	82	653	171	1163	296	64	647	1385	414	32	809	1569	338	374	176	108	145	145	427	731	197	2205	474	1153	299	1424	434	4411	980	1984	1423	239	558	374	205	132	1189	1255	866	381	1079	84	180	473	52
0	0	2	3	4	8	43	0	9	13	4	186	10	0	41	70	15	5	18	11	25	0	4	11	3	0	30	1	2	14	1	2	152	80	6	1	400	85	0	2	0	26	7	0	2	1	2	1	3	1
217	148	306	286	395	504	316	95	1860	664	418	372	267	183	251	276	480	197	3531	368	552	222	183	548	480	229	1295	204	1186	325	451	187	1155	665	266	390	274	144	503	691	187	912	295	484	641	533	445	239	747	603
294	1010	878	366	3282	130	1819	6626	813	1338	14	5840	2478	450	3863	266	913	418	658	315	1703	631	3543	1824	405	163	2434	1418	2979	3059	2790	1234	3601	1318	904	837	1203	470	47	756	2304	2518	838	991	186	661	538	7483	141	178
276	48	206	250	320	1042	235	94	69	72	202	334	182	36	74	22	122	51	105	9	125	52	132	129	145	36	224	184	31	213	84	81	549	254	617	154	149	68	13	37	124	211	54	118	5	251	12	122	53	12
270	734	102	99	643	235	860	173	307	657	281	723	395	75	196	952	659	521	395	192	748	202	48	285	251	509	687	177	389	199	173	116	1361	721	2360	479	726	724	81	101	231	366	329	343	62	201	393	75	100	132
837	2462	986	933	1726	1053	3572	2351	1225	3370	3065	2959	2041	1166	792	2643	778	2684	5766	1659	5429	982	2185	1233	1196	2170	1426	1481	1864	4575	2421	1759	1867	2584	756	827	1933	767	1041	1115	1236	1630	3255	1116	962	3782	1832	735	1239	1896
2238	10923	3054	2858	4925	1190	5589	2688	2301	9301	10647	5385	14512	2845	4430	6651	3802	2293	2829	914	4606	2802	5618	1802	2405	6970	4781	6598	2768	9485	8356	2790	13011	7530	3167	4588	3282	3238	444	723	4870	4547	2729	2876	1516	8774	2648	5029	1294	5852
1895	3564	1869	2706	3779	2846	3441	3945	1362	6692	3887	6006	4668	2443	1979	7189	1822	4488	7785	2196	3891	1831	2475	2324	3147	4754	2881	2946	4203	4563	4115	2983	4468	4943	2036	2018	2528	1561	727	1450	1237	2556	4946	2309	1703	6024	1208	2869	3186	1592
1	6	0	0	0	0	0	0	0	3	0	4	0	0	3	0	0	2	3	1	0	1	0	4	0	1	0	2	1	0	0	1	4	2	1	1	2	0	0	0	0	7	2	1	0	1	2	2	0	5
806	1796	489	1033	2098	264	756	948	1965	2162	1330	1985	1866	1167	812	1506	667	1199	4025	2163	1727	1052	1537	1607	1288	814	1613	1928	1970	4361	1713	1172	1834	1579	875	623	779	358	823	900	797	1143	4238	2320	1055	1784	267	1302	1415	52
794	1858	790	962	1616	155	976	1323	1153	1965	1197	4278	1607	1345	897	2141	603	1332	5645	1165	1868	1318	2080	1011	1203	577	1448	1780	1943	3465	2134	1030	1551	1455	884	596	773	482	367	518	587	1383	5521	2452	407	1627	192	1184	712	43
495	944	495	804	913	295	435	357	1024	1675	280	1668	1049	1090	653	1667	386	1062	1689	1219	291	544	709	663	653	422	523	751	1265	3055	1011	880	855	1109	447	380	1050	175	177	252	499	1174	2603	1492	445	1175	215	577	793	60
3851	5537	2480	9972	7634	3412	3417	8792	6381	29256	7937	20829	22362	8999	21828	22828	2879	22576	38833	15217	8545	4366	7750	4252	7667	8052	12159	3500	19175	21482	15966	4382	8614	11928	3588	2739	4569	4667	3393	7841	4588	6202	11730	9503	6980	20005	2411	31058	6612	1319
942	3082	1174	1149	3079	1063	2568	1472	2436	7219	1776	5890	1670	2515	1752	5624	1686	2825	4444	2113	5166	1826	2611	3277	1381	1982	2347	2430	3875	5397	3919	1924	5309	3338	2420	1805	4630	918	470	835	1616	5443	4686	5727	656	3456	1812	2536	517	1913
1185	4122	1229	3705	1877	1860	5236	6759	1471	6486	2180	19938	4371	1108	1590	990	1432	2103	2518	1083	27446	1184	989	947	1938	492	2307	1761	4931	4930	2519	1297	3344	8593	1372	1512	5206	2812	515	2300	2142	1539	5709	738	754	5698	3849	2514	509	2606
257	155	520	684	870	337	419	1512	1013	2074	498	1159	1326	606	402	1153	759	882	1554	1170	1457	427	462	333	775	651	1667	681	1084	884	776	439	2197	1356	616	874	729	310	520	685	534	894	1840	912	658	1880	501	1478	890	913
63	31	389	157	350	2376	859	46	212	1663	82	160	336	38	90	16318	376	3177	45	3153	7349	1880	129	21	189	85	519	100	284	755	77	29	1758	1581	865	266	5911	462	26	59	82	257	155	1650	34	261	418	146	92	53
6912	5714	704	10626	17432	6921	5219	14217	9250	9953	10804	24390	18625	6549	5908	13143	7228	8953	38039	6258	8890	11357	8774	4813	14154	6292	10876	17436	29255	21947	18245	7256	17178	14620	5431	5349	4736	7255	3381	5283	7764	9002	34125	7560	3463	13143	2433	5203	9104	829
628	1217	156	893	4668	221	986	1013	1080	3054	310	4849	2953	1712	2551	3565	936	1344	2709	370	2182	1579	2744	578	940	937	1737	1207	4272	1900	2597	577	2775	1418	1106	925	1863	329	153	687	1258	4042	4656	1940	824	1558	413	2240	191	207
92	93	25	87	2461	270	574	63	154	503	77	113	250	109	49	74	247	185	115	29	292	83	167	81	135	75	221	65	162	181	233	112	1110	149	501	192	429	112	51	182	93	356	286	246	47	339	404	230	76	507
429	1068	485	654	1047	385	1086	839	737	1897	895	1397	1154	478	343	1248	551	852	1889	617	1025	495	309	403	745	725	1170	512	2416	635	743	560	1470	1409	658	546	905	343	564	551	494	717	1184	836	735	1653	332	513	973	390
1699	2509	2010	2766	4193	2246	2789	3666	3193	2976	4121	4539	4492	1822	1378	3543	2095	3817	5465	1450	5580	2049	2958	1840	2685	1866	3999	2316	2811	4090	2386	2798	5348	5997	2361	1898	2482	1261	1742	1723	2971	2232	3355	2552	1653	4054	627	1851	1822	1595
223	102	59	335	468	113	482	232	497	770	298	775	294	118	69	65	519	495	4022	338	194	151	528	103	434	965	1495	283	175	1045	213	198	830	461	507	515	1764	133	152	258	659	530	292	233	74	601	43	271	400	491
106	39	472	119	1605	305	1306	4633	323	1030	13	107	7709	166	3202	5491	437	3736	49	1615	115	221	3318	2107	304	78	837	2150	79	17068	1723	1352	1899	565	416	198	112	640	12	247	1596	826	114	312	4	1083	156	314	121	108
2	2	1	4	2	0	4	2	3	4	3	15	1	0	4	0	2	3	4	0	1	5	0	1	5	1	7	4	1	4	2	3	14	2	3	9	0	2	1	6	12	4	4	1	0	3	0	6	3	8
1942	292	54	720	609	65	201	395	790	435	187	544	4009	7755	43	54	2017	454	1151	122	84	425	896	512	538	148	1507	256	54	187	3332	269	3869	895	489	1006	257	67	606	536	710	1103	211	642	493	787	70	1942	3414	114
3265	3025	934	3630	11950	1353	4166	3612	3820	11557	3068	10433	6096	6438	5724	14123	2667	2457	12661	3425	8096	5135	13728	2118	4947	3400	6499	3157	11259	9194	3425	3721	4777	7648	2135	2487	3759	2760	777	1519	3099	5282	14072	5463	1211	7085	718	5611	2265	514
303	969	332	346	927	446	829	614	878	1301	880	1221	722	555	534	1383	351	730	1385	477	1624	466	587	570	723	638	597	565	928	1067	1075	828	1046	1215	514	416	800	270	641	395	426	823	1436	805	909	899	468	433	655	610
1246	2001	845	2059	3873	737	1511	1981	2578	4240	2729	5512	3104	2176	2467	5016	1281	1819	14199	2052	2698	1808	2683	1211	2430	1445	3246	1626	6179	3907	3254	1159	3588	2510	1711	1233	1899	816	1830	1187	1245	2772	5331	3823	1719	3775	481	1727	2686	202
2177	5511	645	2428	2160	1128	4482	1445	1913	1991	6182	2810	3404	793	971	498	8942	1113	2211	284	1112	780	767	927	2158	945	10681	2963	956	1272	1629	2372	31284	2597	1881	6242	852	1590	1752	1280	1655	3216	2040	828	963	2952	159	203	2567	1568
476	2011	631	661	1129	642	841	1189	1348	2237	751	2455	1168	759	707	1384	581	1296	2391	844	3175	559	823	1103	786	691	1570	834	3974	2068	1760	1445	1719	1357	576	518	1887	578	1650	1009	818	1116	1596	1595	1268	1319	994	1036	1422	284
1673	4353	949	2097	3098	1004	3597	6522	1296	6462	2604	8720	5844	2770	937	3885	3829	2938	4219	1029	4345	1961	2331	2850	2599	3288	4237	3251	7974	5219	7631	2740	9969	3812	3558	4108	2289	1567	364	904	1814	3769	5832	2497	512	3631	923	3632	888	879
5161	6958	3886	6199	13002	3013	5266	8206	5120	15116	7317	17829	14611	9069	7564	23402	4279	9399	36117	6793	15764	8072	10686	3616	10143	7645	8168	6479	15462	17245	9323	5327	10835	12959	5552	4182	5524	3106	816	2823	4854	7959	23786	8538	1717	14375	1529	9754	3423	1832
740	2092	570	1129	1798	334	1000	3581	2034	6102	686	5000	4358	1502	1404	2948	948	1715	4853	1419	3168	915	1962	2140	1098	1380	2289	1403	6429	2064	4388	1018	2824	1667	1121	986	1797	602	1018	1376	1779	3016	2131	3040	786	2528	995	3034	1003	293
3005	2154	7020	5151	5635	1673	3783	8551	3177	6286	5279	9038	11579	2837	6279	3605	8398	1354	5970	1554	2356	1787	2249	2502	4286	3087	13119	6488	13566	8182	11200	3101	23732	5892	3330	5438	1228	2254	3367	3648	4412	8269	8886	8707	2028	8304	714	4469	2840	213
549	682	719	964	1167	160	754	1719	1040	1336	634	2553	2245	873	1561	1551	450	377	5065	668	1188	416	566	522	1082	456	1163	648	2792	1546	2910	1129	1548	1196	580	445	594	261	787	1702	572	1045	1812	2550	961	1310	190	2243	878	43
854	2952	1127	988	1685	674	2655	2892	1307	5113	510	7024	5822	1642	564	3235	796	2228	3591	1233	3582	1746	1190	2092	1310	2942	1260	2093	3354	3003	3198	3192	2833	2570	836	1074	2662	1183	467	559	950	1678	3408	1010	514	3777	1042	2090	1059	1444
2986	5129	2380	4345	5234	4571	4681	3020	3964	8924	4560	6518	6060	3526	1679	6583	2367	5814	14525	5330	5542	2768	4199	2787	5314	4995	6705	2353	11219	5835	4031	3455	5656	8692	2568	2224	4179	2741	4576	3266	2492	2712	6613	4579	5274	9142	1592	2660	7568	2287
3617	8147	4962	3889	9243	4832	5504	14394	9027	8483	9621	10775	17038	3968	1910	9616	3563	9688	16388	4621	14986	6917	5151	2632	5185	3413	6443	6492	5799	8222	5600	7849	9717	7168	4823	3917	8137	4476	6987	2569	4673	3926	10115	4923	7240	9250	2092	2466	7983	2231
2372	2376	1208	10517	7747	4658	7828	6608	3898	8597	5163	9703	11461	1996	2895	6803	1967	3029	28248	4659	18897	2193	1771	4804	7505	3577	4668	2505	18427	24003	9583	3747	5633	6169	3370	1722	3120	2935	3579	7286	14018	4933	12577	2752	4612	20539	7492	3490	10702	2469
980	3981	1092	1351	3481	1238	2276	1491	1129	3337	2913	2829	2824	1407	639	5086	714	3614	4517	1690	2511	2508	2163	940	1834	1745	1057	771	4519	3275	2005	1497	1910	3356	1028	848	1260	1119	843	912	929	939	3573	1320	2085	4277	531	1774	1678	779
1076	1852	1208	1431	3132	2120	3526	4227	2050	4788	6045	12363	3079	1315	3110	4516	1795	4109	6956	2491	4577	1076	6125	1826	2205	2692	2760	1619	3290	2752	2183	3635	4965	4855	1824	2123	2798	1411	1670	1410	1988	2403	2683	1943	2557	3881	1597	1926	1817	2992
1009	1560	449	1300	1696	276	593	1026	1377	2661	1921	3163	2359	2463	1657	2203	591	962	9854	1287	1979	1147	1417	753	1353	455	1368	958	2625	1853	777	1065	1851	980	839	779	1002	626	543	611	476	1244	3280	2445	462	1155	300	1369	1937	27
1635	2542	1083	1952	2987	2791	1948	1788	1799	5123	6245	4345	3530	1799	564	3817	1215	2918	5698	640	1602	2229	3881	1561	2311	2491	1555	3703	4600	3129	3176	2568	4023	7439	1878	1888	3054	2822	647	392	1562	2265	2408	1558	371	3861	1335	2215	1145	1028
266	2066	84	625	1639	1228	1612	102	238	421	82	1293	762	73	589	155	859	222	2172	613	441	153	107	79	349	242	1053	667	440	1373	91	872	5082	2267	3097	906	2027	520	89	135	237	557	1474	148	24	930	199	150	112	138
11	9	15	12	9	8	56	7	1	87	1	10	11	1	0	0	9	0	3	1	1	15	934	2	14	1	130	10	1	2	12	17	18	86	170	60	0	18	1	4	43	7	11	5	4	7	0	6	1	6
87	211	391	232	113	307	172	263	108	696	572	501	296	503	37	2064	15	1504	4995	780	2088	88	626	242	125	1158	42	96	528	1806	689	420	23	498	22	17	852	194	304	129	129	75	862	185	293	675	244	103	863	128
1510	1588	96	1018	2094	2918	785	1105	1653	2041	875	2257	645	1731	372	5612	489	2491	1280	668	802	1099	3229	1110	1485	1352	859	862	1134	3674	961	360	1132	2276	964	679	2179	603	308	452	964	1659	1342	1733	323	1961	965	1050	333	659
5999	13617	10225	7851	19932	2463	8906	28281	4235	38691	24	35688	18028	6226	15142	22003	4683	17104	12317	8082	9014	12579	10484	15657	12820	6944	6529	14121	44666	55577	11082	13567	14246	8160	5905	5939	10043	2036	569	5096	12978	12513	34489	18209	2846	25231	12411	7351	2172	2017
0	1	0	0	1	1	0	0	0	1	0	0	0	0	0	0	0	0	2	0	0	0	0	0	0	0	0	1	1	0	0	0	3	1	1	0	0	0	0	0	1	0	0	1	0	1	0	0	0	1
1676	3528	290	835	1722	434	3343	1107	2261	2178	309	5607	846	889	202	324	1580	895	826	660	448	569	287	1314	1602	993	2068	646	1006	802	1569	456	4209	1397	983	2173	1421	400	649	1099	847	2317	1236	1007	482	2993	388	1592	736	4210
4507	10076	3990	4778	10128	3949	6083	9828	4535	9353	8619	9293	12183	7140	3899	14773	2901	8962	15532	11127	8150	5885	11250	4123	8583	4189	6686	4712	21468	9908	10165	7110	8147	9246	3972	2958	9385	4258	3381	4623	4665	4914	10385	8307	3132	13326	3382	10265	6218	1179
627	904	1027	806	1003	754	1538	1553	1187	1977	907	2129	2501	883	392	2508	513	1210	1948	1909	1118	626	1908	1030	1440	904	1048	734	3826	1172	3268	1120	1468	3188	609	527	1587	724	423	1232	1051	1031	1239	858	639	2520	339	2939	761	551
1126	2224	1426	1927	2567	769	2003	594	2384	4643	964	1482	2303	2136	995	4277	783	2223	6463	1453	1746	2305	991	768	2279	1248	1614	1073	1981	5296	1023	1640	2469	2865	1025	780	1052	1215	682	806	1056	1513	3653	1986	1032	3136	1525	2349	2253	405
534	1262	491	860	1257	577	622	1922	1014	2313	790	2882	1879	975	479	1511	664	2129	1586	760	2357	640	960	1190	759	1091	1413	1114	2453	1596	1399	873	1904	1303	936	612	1328	613	479	550	1127	968	2192	1165	490	2503	627	1266	1175	483
1649	2704	4827	2677	3984	1399	1763	2783	4920	6639	2837	5265	5093	1921	1571	7726	1450	4275	8827	5818	3157	2751	4466	2156	3999	2622	4986	2551	5957	8649	3631	3764	3769	4209	1711	1348	2115	1000	4293	3414	2671	2699	6165	4555	3700	9207	2132	2828	8861	732
2486	2785	1496	1956	5759	2800	5158	3659	2030	9010	3393	7604	6311	3429	1090	5551	3146	5280	4083	2926	3416	2475	5626	3069	4122	3487	3695	3349	7267	10642	4033	4113	9171	7037	4091	4062	5437	2671	297	843	3040	4934	7428	3289	551	6848	1418	4676	649	3722
5476	2425	1078	7925	3325	5034	8966	2324	6653	5557	316	6723	6178	1518	472	733	6013	3952	6035	435	2877	1271	1758	3153	6230	4447	5523	6113	6806	3566	6919	4337	19011	23085	5007	5807	1276	11731	2522	1437	3406	5150	4132	1766	874	6628	692	3242	6753	3157
1965	3718	3223	2062	4162	2838	2203	4353	3731	6164	4278	5362	3810	3652	1808	5795	1442	5409	6841	2698	6137	2305	6695	2173	3176	2324	3783	2420	4121	11274	3898	3555	3352	5357	1365	1293	3051	1373	3942	2370	2315	1818	6436	3033	5283	4624	2485	2243	6572	1164
1163	1022	825	1129	1838	627	1555	3772	1671	2912	1772	4780	2779	1229	655	1945	1056	1457	3319	720	2714	1167	1617	855	1581	1689	2360	1312	1884	1633	2696	1045	2606	2015	1176	1053	1516	930	1036	1197	1947	1364	2360	1375	1450	3818	545	918	2355	1209
275	789	271	646	770	195	414	858	744	1262	773	1407	526	383	237	1222	214	531	2895	588	2224	300	1598	146	459	285	763	260	1173	783	814	684	412	826	152	217	980	388	995	446	328	433	1423	475	1045	1297	361	265	1232	272
61	0	64	1	15	0	26	0	12	2	3	16	3	0	3	0	2	27	7	163	446	15	2	3	1	1	7	0	0	10	2	5	8	7	10	5	46	13	105	0	3	5	1	47	0	3	6	0	2	1
2736	18347	1553	4113	7170	4210	7308	11880	2508	6882	8591	19085	7339	2780	1697	7492	4130	5906	8190	6912	13430	3470	8249	4488	4882	4408	5620	7863	7911	7905	6133	6300	10301	6129	4355	4298	3676	2231	912	2278	3341	4491	9859	2162	1121	10739	1727	2932	2022	6319
788	614	754	1238	1895	712	853	1190	3130	1925	1594	2565	1432	995	477	920	831	1510	6033	1414	2530	995	765	504	1061	879	3260	902	1187	1506	1106	957	1802	1252	710	848	1062	452	1982	1537	1362	959	1371	823	1764	1870	459	693	3840	756
365	271	25	13528	1168	17063	4690	62	106	4652	1575	1970	1168	101	31	85	75	266	2698	38	60	113	162	3137	2333	2761	140	1184	41	1495	2209	4878	166	14617	2923	418	230	326	27	1422	297	998	8764	208	24	974	73	397	598	194
200	1613	57	146	747	45	318	562	765	85	1942	907	1782	493	633	1703	314	1008	1886	2232	240	783	578	235	117	710	651	1097	1266	889	2374	588	1128	672	579	369	268	33	157	461	720	639	1139	420	1213	245	324	1194	1079	137
67	230	313	124	194	131	221	312	210	783	103	806	212	187	218	1039	127	737	646	307	515	109	268	259	220	262	206	231	578	890	600	155	433	257	146	137	573	174	123	119	252	432	368	254	197	274	439	173	333	276
393	638	47	104	855	29	255	128	323	361	18	340	48	212	155	30	445	691	2165	59	93	228	92	345	303	147	653	172	25	346	66	79	584	124	281	398	164	55	73	117	205	524	212	330	10	490	225	82	108	216
1675	3013	973	1075	2369	185	957	2176	2658	1175	112	5049	3849	831	3196	4985	1485	1229	2445	213	6879	6376	964	1452	1394	1842	1942	2009	4448	3039	4614	3061	4932	2335	2591	1581	1185	945	388	489	2543	2472	5350	3273	1513	3479	768	1446	314	227
518	1849	674	506	1140	1703	1143	1530	741	1166	2417	2688	1371	1062	651	2413	871	1514	1388	560	2341	845	1519	719	647	733	1225	794	1383	1936	1848	1002	3054	1938	1209	1027	1507	785	568	412	870	1810	1229	1342	565	1299	390	1148	713	384
5082	27914	4826	8348	10888	1938	6477	13736	11008	8316	1785	9605	13010	2908	5802	38523	6942	16784	13387	4360	4747	8593	7399	9554	6642	2116	10297	7820	11777	66020	9806	13777	16617	12711	5052	4808	5025	2934	3709	3876	16420	6184	14674	3150	3301	9043	8355	2954	8553	2668
481	666	4514	914	1554	67	452	1011	4423	7359	867	1226	10789	2519	398	1309	636	5683	4640	2038	743	1404	4465	582	1394	837	2562	472	1151	6012	4035	1959	1284	2295	539	830	5196	403	2473	1025	2156	1154	1817	1836	2821	4864	881	2306	1823	833
1908	1133	557	2232	1999	826	2197	2847	1462	3518	5179	2404	1428	1053	448	6797	2020	4555	4040	7577	2082	737	1476	755	2186	3184	3690	1262	960	3112	1261	1313	4886	2991	2030	1825	3257	1718	729	1157	1201	2365	1827	2504	516	3839	454	2072	2055	901
1777	2477	1237	2181	3567	2478	4724	3935	2496	4334	3157	5634	3621	1761	1763	5569	1764	2798	4103	2571	4197	1733	5453	2512	2956	2837	2681	1607	6037	4417	3710	2911	5261	4344	1953	2234	2713	1343	774	1334	1360	2722	4182	2231	850	5321	1589	2826	1527	5325
1197	2961	3168	2445	3079	1680	2012	477	2384	5354	3630	2234	3022	2501	2420	8628	471	6462	14969	3379	11658	2296	4992	906	2168	3521	2206	1000	3109	5099	1479	3618	888	5004	401	667	4119	1597	6186	1645	1559	1763	5180	1602	2836	6550	2211	1399	8309	1576
680	1438	532	978	1124	881	2407	1601	747	17116	4258	2802	793	813	222	3116	310	1737	2523	772	565	1052	1286	671	1028	2001	675	381	534	1854	1377	575	894	2416	493	490	594	530	420	887	916	977	769	967	435	4977	802	1946	1259	2514
1213	917	785	1448	2510	1539	747	1614	1131	3650	3172	2733	1898	923	508	2689	1292	2245	3107	806	1974	689	1421	1679	1866	1807	1881	1370	3064	3801	1939	1354	3571	3237	1656	1369	1373	806	313	688	898	2022	2803	1125	371	2023	721	947	632	615
10648	23596	5532	14991	21477	9502	7696	19491	19928	27572	24508	27243	21388	14770	6688	30566	8755	14412	57921	21853	17876	10692	37283	7871	17661	14075	39080	14659	25023	51227	10469	18065	21663	18083	9187	10115	23839	9920	15635	8263	11410	15001	19087	17939	17096	27725	8248	10619	31220	3076
1140	2109	182	2342	4714	590	1024	2539	2106	3142	1389	4957	4033	1507	792	1776	1442	1205	4502	772	559	1339	2906	969	2256	1111	3490	2010	2993	3736	2300	2328	3505	2056	1574	1520	853	1081	337	744	2227	2154	3808	1231	443	3658	473	2023	746	365
3563	5467	1418	2742	6012	1296	5263	10369	5150	8654	2129	17334	5635	2853	1762	4099	4066	3624	11971	2938	7085	2105	3508	3736	4249	1592	8707	3380	10039	4869	9346	2142	10348	4578	3216	4901	3420	1115	2366	8194	3037	5187	10628	3534	4516	11838	2499	5353	3751	2138
10	53	0	8	16	0	13	0	4	8	127	0	3	0	4	0	4	3	0	0	1795	0	0	1	5	1	4	4	32	0	0	1	6	1	50	2	1	0	1	0	1	0	2	69	0	10	0	1	0	2
2439	3095	2659	3202	4871	1799	2352	4010	2695	6838	4293	7679	4689	3374	2105	5748	1891	4164	12849	3480	8216	2484	3097	2551	3202	3054	3610	2993	6848	8522	4686	3573	4956	4336	2340	1889	3516	1610	1147	1497	2266	2570	7011	3592	1206	5059	2039	3068	3160	1018
1384	591	721	1918	1814	389	1423	864	742	1834	3175	1619	2470	1336	983	651	2911	948	975	158	903	712	1762	516	1710	633	2641	2257	1410	2151	2304	1639	10677	1346	1767	2655	414	1637	364	360	967	2448	1895	2181	257	1914	108	302	734	214
1508	1848	2263	1690	2284	3731	2715	2971	1374	5386	3088	6301	3291	2102	686	3267	1483	7183	4627	2098	3686	1420	3158	1846	2804	2427	2254	1939	2644	8249	1918	3108	4100	5595	1457	1892	3081	1208	469	644	1208	2048	3280	1112	394	7072	1113	1776	1008	2704
1907	3047	1660	1681	3248	2174	1139	4133	1833	34621	2381	4784	3238	2650	1568	2814	1537	3870	5802	2401	7000	1488	2863	2219	2783	2473	2826	2420	5875	6027	2375	2710	4174	3387	2088	1695	3784	1469	727	875	3059	2526	6317	2661	542	4981	2488	2470	1737	672
483	963	664	537	1585	584	926	1479	727	2596	760	1645	1399	612	403	1197	582	1011	1579	713	1204	679	1499	650	847	803	730	899	1585	2892	655	888	1776	1185	1003	608	1112	413	203	294	685	918	1285	1313	244	1453	503	807	308	332
1452	3530	960	1438	2352	921	1058	3074	2339	4636	1599	4095	2980	1724	1455	3154	1109	1881	4681	2842	1999	1372	6162	2448	3023	1738	2783	2253	4628	3470	2198	1424	3526	3189	1616	1318	2700	896	821	1113	1919	2522	3230	2878	701	3039	1088	2856	1624	783
58	208	49	103	366	7	285	233	408	72	18	179	700	31	159	286	299	46	569	61	67	74	90	153	122	107	579	116	506	85	142	132	1276	125	495	150	114	37	180	317	280	279	121	250	128	182	50	287	284	43
5	25	9	18	82	5	63	12	15	129	6	20	4	35	14	58	14	14	64	39	27	17	95	17	15	76	9	5	202	65	172	7	67	19	20	13	133	11	6	19	6	114	19	20	15	93	7	74	7	14
33	638	247	26	121	346	251	261	163	576	458	209	47	474	179	297	106	1267	272	1532	254	48	274	62	661	859	165	122	506	1389	31	207	485	1175	313	50	889	617	330	421	489	42	580	273	78	336	5	1762	1247	15
187	706	2357	268	415	1016	935	681	171	2107	2351	815	551	1434	98	1963	52	4048	2441	745	5573	162	2099	379	422	1789	70	196	1001	3077	2005	598	89	1715	54	62	3303	280	476	144	141	201	3016	528	380	1061	753	364	262	1473
1913	662	104	1963	2168	473	1890	507	2901	5025	822	3384	862	1132	120	171	670	1801	2868	1832	731	537	528	648	1945	2394	2188	453	574	698	497	538	1658	2164	666	1565	2090	670	683	1006	1055	2866	1487	956	335	5854	243	1601	1847	3577
2625	4006	1542	4728	4739	2568	2299	6233	7540	7415	3630	11767	10028	4014	3391	7880	2596	4220	13685	4166	2116	2396	7454	5002	5274	3893	7193	4618	8366	14169	4519	3445	5707	6632	2971	2761	3478	2547	2663	3300	3462	4361	8071	4391	3527	9890	1865	3054	8630	411
1907	810	184	2781	3148	353	447	962	4223	6732	1713	3748	801	2809	518	276	2968	1798	3315	4274	532	985	975	244	3347	2100	20440	1082	2993	1464	1466	526	4552	2788	1446	2992	1743	1047	1166	1936	1069	7075	3149	4380	730	5152	133	3623	4448	251
209	877	342	655	740	224	401	774	805	675	462	697	544	399	593	404	167	514	2301	506	644	359	406	226	420	335	679	596	828	697	884	532	513	433	251	187	470	209	685	516	297	401	1095	602	710	604	343	229	1140	95
37	10	25	55	18	192	35	19	27	26	9	68	91	9	44	4	39	17	13	7	11	8	30	23	50	8	59	67	70	34	17	46	117	112	48	27	20	55	13	12	31	15	62	8	19	19	6	3	20	11
1555	988	62	607	1934	15	553	801	20838	632	19	641	6	1829	183	128	31670	46	3695	4	1261	4086	2	1289	3258	144	51248	2507	103	1830	3253	81	58272	796	17764	37282	564	49	358	2233	4597	9987	9	3677	242	4559	313	5422	971	1276
874	1371	1066	1061	2078	1147	2395	1531	1438	1977	1506	2908	1810	831	459	1887	893	1700	2759	1040	1985	1031	1417	925	1287	1263	1589	1058	1770	3210	1259	1071	2104	2473	834	1039	1298	526	951	902	1149	1480	2163	871	885	3251	673	1081	837	1731
474	1179	750	595	1043	733	1918	1030	1044	1354	1602	1199	862	441	597	850	826	998	1788	1052	1024	548	640	671	765	640	1366	952	954	1665	1274	689	2693	1310	854	1137	1661	445	515	482	525	1433	1054	888	480	1275	714	891	411	1251
1692	3555	2584	3466	3797	2537	4405	5826	3166	5754	1026	4382	4918	1630	2631	4518	1498	3777	11395	4261	4685	2482	4382	2247	2595	4084	2778	3515	3922	7930	4939	3898	3901	5641	1848	1511	3120	1845	2408	2495	2374	2183	7308	2873	2988	7775	2217	3374	2681	1711
951	2665	4096	420	1333	1184	2575	540	1123	1145	12	2965	3213	319	366	67	2218	393	686	1536	1539	324	82	2499	1067	263	3053	845	2497	881	495	295	5354	1818	3248	2459	1031	1162	211	511	634	2365	1113	1173	60	815	209	1174	250	356
421	1093	355	686	1024	557	1021	1321	897	1516	2550	3163	822	368	440	1311	502	844	2386	594	1762	461	431	456	640	779	1015	659	1242	787	782	765	1146	1510	391	512	880	437	1248	780	577	595	1312	483	1290	1449	443	443	1493	714
822	1287	504	671	1290	453	535	2075	1043	2371	1629	3386	2282	1177	1140	1392	684	1475	1675	1187	3602	1070	951	578	884	600	1720	914	1253	1420	932	828	1832	1073	759	818	3135	346	427	1067	1276	1089	1580	1209	583	1352	1156	2057	1069	324
428	165	248	594	708	453	1056	1452	754	688	4498	534	958	166	382	61	1488	475	1115	623	1210	313	500	527	633	187	1911	489	842	527	481	697	5586	1526	1550	1353	449	518	198	499	685	762	448	508	123	536	111	574	251	227
220	483	200	230	598	254	614	632	641	787	423	1163	852	608	180	729	291	574	3325	372	1280	297	729	298	308	310	640	269	821	444	597	367	810	572	313	246	1137	204	465	632	484	519	713	451	598	765	207	758	453	598
1659	1680	1741	2325	3281	1944	4099	3659	2893	5432	3475	7010	3275	1843	1267	4536	1910	2614	5161	1750	3171	1702	2096	2958	3470	2560	2583	1741	5673	4309	3973	2389	4824	5554	1970	2055	2798	1149	1065	3190	2155	2753	3115	2040	1212	5816	1497	5148	1355	2141
448	540	708	710	800	1080	478	718	636	1486	2561	1246	1287	468	422	698	385	1762	2248	769	1754	404	1035	621	718	935	807	563	855	2031	749	1078	1023	1233	454	395	903	432	1228	467	684	608	1094	785	718	1238	579	353	1708	268
162	53	67	191	159	57	258	82	61	358	55	186	200	100	285	42	302	42	67	14	1258	187	150	33	220	35	233	250	94	450	82	225	1210	148	424	497	86	129	29	25	394	379	253	213	24	90	3	58	21	2
956	2130	949	1199	2233	1117	4105	2687	1186	3444	2229	3453	1815	645	870	1327	1415	1025	2118	1680	2640	944	1217	1357	1719	1338	1663	1722	1552	3608	2684	1467	4634	2991	1784	1703	2783	1036	287	632	1140	2083	1926	1202	328	2720	1118	3942	285	2427
2186	7533	1856	2365	4237	1941	13129	6210	3507	8401	5852	12900	5526	3969	2372	6868	2212	6366	10620	2104	12714	2568	5565	3262	2836	5468	3423	3151	13229	14246	7076	5221	5353	7192	2177	2321	4733	2567	1929	2017	3189	3210	3570	2450	3455	11384	3292	2722	2767	6217
0	0	0	3	0	0	3	2	1	0	0	2	2	1	0	0	5	0	3	0	0	1	1	0	0	0	1	1	0	0	3	1	7	0	2	0	0	0	0	0	0	2	0	0	0	0	0	269	2	0
392	447	1692	367	931	163	893	792	336	1214	1020	1221	1109	735	161	398	269	1110	1512	537	968	355	818	443	416	326	485	664	878	1700	721	645	833	542	408	312	835	260	190	347	412	550	914	719	160	1244	660	394	233	408
678	2456	829	1461	1486	827	2429	2508	1770	3328	2633	3731	1785	1495	978	3669	463	4547	13282	874	6957	1193	2090	1032	882	1739	1215	926	6683	4248	2592	2235	1292	2071	584	535	1772	1092	2458	1247	1006	1287	2295	889	4076	5658	2129	395	2323	1253
108	67	92	74	152	38	196	44	119	562	14	309	93	67	21	2401	94	178	176	63	134	49	176	74	398	104	159	79	2220	131	398	26	414	276	191	101	355	48	60	173	90	202	76	1725	363	353	89	60	374	288
907	1306	2770	1153	2191	436	1288	1988	2011	1614	666	2248	3919	854	538	2259	707	2687	2313	669	2117	1069	2262	750	1698	829	2144	1135	1521	5694	3074	2215	1991	1214	1008	861	4873	756	1102	883	1898	1563	1002	1510	1639	3177	1226	734	1343	599
973	2522	604	1007	2135	849	6207	2759	1351	2599	1435	4925	2363	856	568	2191	2000	852	1685	1730	1741	1096	1202	2398	2223	1894	1633	1456	1752	1699	1938	828	4631	2314	1994	2477	1720	735	247	841	1047	1724	2250	780	292	2556	602	2429	453	3357
2	0	0	1	3557	0	13	2593	1	3	2481	0	2226	1874	225	2266	2344	0	2	535	5513	2	0	2462	2	1584	12	2253	2729	5870	1002	1693	1	5262	1	0	4074	1	474	926	1	3077	868	1471	251	2235	0	0	921	1267
971	4133	1349	6004	3838	1558	2690	4954	2109	3867	5904	4818	5052	9758	9810	30996	1071	16721	60210	16953	4731	3251	14582	974	4132	17814	3198	6747	3961	11923	6487	3151	2096	12517	2025	1265	7176	824	2463	871	6130	1744	8686	12243	2327	11912	2228	5227	10719	1276
1435	1920	1640	2282	1852	738	1782	4683	3187	2211	1592	6422	5340	1357	2730	12707	2655	4563	6242	2549	2184	980	2218	1896	1485	1502	9773	2433	3115	8413	7123	3931	5930	2688	2016	2794	4474	794	3039	3681	3802	3460	5597	3205	4336	4696	2100	1083	5131	757
3620	3877	1853	3004	5592	2033	4819	5831	4749	10423	5165	8592	4167	3064	2163	4224	4029	5336	12754	4503	1801	2036	4001	4232	5855	3340	5368	5480	3119	9651	3683	2584	10250	7474	3402	4729	5371	2022	4282	3473	2316	3744	8484	3240	3474	8283	1676	4575	5890	3621
7602	2762	1722	13911	6904	4081	9052	4809	8606	8222	12115	22542	9423	5439	2855	8990	13493	11414	25675	16722	4563	4938	7453	10979	10298	9110	29418	11022	5110	8860	7568	3759	66297	11691	7345	13393	4251	4374	6228	4939	5695	6011	9199	8344	2163	19390	3088	5075	19806	6083
1358	393	828	1299	1124	497	1269	386	1043	1683	903	1671	3172	635	870	360	500	1033	1346	676	730	240	567	834	1079	665	958	699	2151	843	747	1070	1410	1392	1020	608	1501	1219	590	668	763	1187	1509	1170	604	1786	799	1036	981	236
2133	420	2289	1643	3690	1484	1529	10733	2621	6437	1116	4374	4195	612	1758	5121	2467	3521	685	82	15466	1276	4159	4037	3138	369	2803	5134	2535	4022	1977	2609	8372	3946	3963	2839	2772	2210	175	486	3999	2374	3090	2491	119	2790	1260	1744	719	668
18454	37612	4859	23924	20474	6184	56505	29416	47973	49444	19715	128088	25647	18539	13575	12776	11420	16923	64427	12158	35098	12701	14829	8877	20660	21333	27231	14501	67697	48758	15722	25170	22743	45960	15490	15876	12698	18203	27100	49144	25496	17668	79041	6112	38145	59299	16444	6287	49846	10023
348	947	540	1227	1508	550	1126	2290	538	2553	2615	11206	1815	1204	497	5946	302	1595	2933	808	2274	1194	2272	680	1124	314	355	799	1772	2302	3523	1115	882	2321	447	229	1115	546	225	1601	534	959	2020	1088	219	1710	604	2479	832	474
4085	3589	3186	8663	8794	4708	2243	8442	6199	11021	18907	15864	17914	10558	5728	12924	5104	14172	20666	4209	7127	4704	12777	7566	6300	9531	12937	10441	10798	46960	12851	8140	9286	8652	4601	3996	4471	4511	4681	3202	8817	8286	18434	6868	5214	7983	2996	5286	13868	990
184	1133	167	272	1102	144	656	852	889	1221	277	1962	393	750	427	580	287	502	550	376	312	878	60	673	458	413	481	282	3030	1110	735	79	772	1333	401	455	511	199	111	425	511	1439	1113	702	180	877	169	2130	65	147
739	2053	472	966	1494	777	2582	1490	1003	2374	789	2868	1838	577	533	1457	1356	1123	1707	589	1410	782	1427	911	1456	902	2070	700	2247	1132	1206	840	3776	2341	1455	1305	821	873	561	766	692	1167	1840	735	546	1723	396	850	475	1748
473	408	493	546	819	238	451	659	1185	909	731	962	1271	668	438	1368	618	440	1689	596	564	714	785	323	954	1639	902	604	1553	855	1032	468	1199	1476	384	514	514	372	542	1246	546	865	1352	1043	325	1048	65	1150	3418	63
21281	37328	33837	47433	67794	52725	15721	79542	69434	82469	114946	70494	110565	79148	25259	115692	17655	88773	160440	65018	109356	59546	164919	48852	52581	61231	56506	33862	150901	135339	55815	46626	42699	92891	33853	18193	58375	25781	48497	32470	57747	36679	82254	59462	44545	112293	17723	60804	78013	4235
1350	2032	882	1474	2704	978	3063	4656	1431	4937	1974	3507	4653	1367	859	2854	1206	1634	3886	1154	3498	1632	1675	1274	1855	1492	1875	2307	2498	2920	2153	1351	3256	3619	1404	1171	2839	805	476	1499	1232	1756	3050	1830	493	3875	1125	2952	660	1645
1674	3718	2682	2325	3811	2514	2270	4609	2041	5510	2429	4697	8410	2529	1687	4957	1916	5234	9448	1975	4420	2142	4149	1483	2701	3446	4458	1612	6338	4473	4347	2160	4675	5054	2118	1518	2508	1203	4696	2772	1845	1647	4842	4492	5305	6123	1227	2199	3315	981
151	298	453	373	460	249	521	440	742	1088	555	791	421	558	321	1423	248	744	1279	340	580	294	719	513	492	558	822	346	1045	1046	657	382	689	722	346	299	889	254	419	352	351	806	470	977	306	700	330	726	737	343
1178	1459	1132	1229	3274	928	3420	4064	724	6983	2325	3236	3211	1907	752	6224	1338	3245	2649	1275	5463	1536	2926	1742	2458	2276	1096	1594	2032	4947	2185	1984	4120	3184	2199	1371	1772	1056	322	680	1973	1349	2484	739	457	2952	589	2227	528	1901
108	140	57	159	216	210	162	73	188	327	14	224	366	76	107	83	85	194	164	43	231	64	81	212	231	117	110	222	412	175	201	256	419	780	444	142	1143	259	502	61	356	255	96	494	91	293	96	1666	378	77
665	2061	778	1067	1491	862	1858	2175	903	2121	993	3643	2257	870	975	2057	600	1023	4627	1073	3545	836	1137	1095	1599	758	1133	1522	2987	2109	2827	1465	1747	1682	798	679	1522	509	780	1097	1127	1031	3417	1176	995	2676	1032	1001	729	948
19294	16747	9151	29050	34015	21318	15754	21319	44853	27541	33553	59227	53156	22145	12083	38293	20725	34022	91447	29987	27531	17245	20640	19921	25612	38341	57455	30118	35710	63632	28310	27592	47949	33894	23217	20719	20385	13600	21591	22403	28276	27255	38404	19465	25890	45275	9618	15771	53400	5635
2216	2324	2997	2808	3926	2120	3315	4839	2067	5227	3322	9290	4780	2876	1168	5681	1668	4881	6277	3891	5075	2393	3032	1605	3933	3326	2828	2443	5722	4607	3755	3238	4626	5404	1955	1742	2885	1563	696	1224	2450	2492	5466	2129	965	5357	1329	3477	2083	932
33	68	45	70	73	59	123	81	170	125	22	174	63	54	16	106	53	86	165	54	52	54	76	89	40	153	86	27	69	62	97	49	143	109	71	50	58	28	55	108	28	57	154	172	92	121	17	86	86	38
647	827	1833	445	2177	419	1098	2206	1047	1741	55	1541	3548	755	1131	1781	1783	542	825	1299	1042	693	529	3968	1253	755	2649	1330	2242	2803	1518	936	3900	1016	1796	1680	297	335	653	440	2525	2425	3205	2318	1166	2968	354	1703	665	892
1	0	1	0	1074	0	4	1534	1	2	529	0	711	446	28	752	504	0	0	116	847	0	0	668	0	460	0	881	490	1634	143	623	1	1453	0	0	606	0	177	593	1	700	134	274	109	406	0	0	1061	396
4535	7631	2883	7674	12625	2990	9037	24495	4101	13555	5350	9530	15873	5903	3346	16987	2796	7687	17167	6294	16461	4219	12039	5219	7799	5861	5123	5928	14518	12571	18739	8198	7212	11058	3438	2810	7182	2925	2613	2418	5134	5973	16740	4031	5824	18238	3871	8535	4500	2758
101	25	6	15	81	259	225	98	34	335	928	127	108	141	10	357	137	1455	1179	708	1164	49	2548	721	25	3096	43	22	84	64	562	23	322	1549	87	138	826	33	402	12	274	242	132	284	28	3545	21	331	1072	2558
254	101	30	210	156	212	573	108	268	149	3130	263	212	107	33	18	103	520	3516	9	144	60	758	85	280	162	143	276	258	108	149	194	539	501	285	202	101	198	212	57	101	211	114	80	28	295	23	82	81	443
1459	2462	1387	1432	2993	749	1011	3072	2280	6868	2661	5687	3539	2744	1957	6085	1083	1430	7181	2887	4492	1512	4642	1874	2490	3268	3549	1487	3757	2866	3441	1209	2889	3292	1387	1025	3534	1036	1505	1652	1634	2765	5213	4381	1520	4599	755	5952	2727	265
175	260	449	289	545	190	296	477	652	926	154	1224	685	340	726	844	351	186	812	461	504	164	485	658	367	342	929	348	1278	870	943	236	942	623	514	340	394	141	179	722	451	813	773	1326	159	530	234	1087	314	61
139	32	43	60	412	43	274	72	78	205	5	194	181	86	54	16	512	34	39	15	72	134	41	50	107	37	209	118	202	168	129	26	1789	225	1254	332	82	145	19	39	135	216	51	242	8	131	5	119	24	11
0	0	0	0	2	5	4	0	4	5	3	5	7	1	1	1	13	2	1	0	3	0	1	3	3	1	1	0	10	1	1	0	22	1	58	3	3	0	1	11	15	2	2	15	1	1	0	1	1	2
2325	4703	1066	2445	4163	2666	5733	5481	2132	4310	5786	7158	4201	1514	676	7125	2907	4603	6083	2677	6591	2027	2077	3584	3522	2635	3598	2833	2585	6660	4330	2182	7319	15648	2620	3370	4342	1845	950	1475	2408	2872	3961	1642	1018	4799	1604	2084	1098	3492
1891	4132	1247	2240	3305	1996	3493	4693	2933	5337	3803	5604	3777	1716	1785	3701	1381	2725	4888	2114	3864	1604	2731	2765	3378	2499	4439	2298	6838	4359	4150	3481	3062	5520	1272	1583	4922	2269	2017	2507	3004	2173	3680	2021	1572	5855	1470	3156	2847	1750
943	1187	1148	747	2098	837	2287	532	1288	5317	892	4104	1323	567	387	3823	1117	2301	1906	1851	1942	1957	617	454	2369	1000	2171	668	1826	2058	686	753	4123	2737	1303	1645	4542	1042	429	753	816	1467	996	1965	434	4279	1002	3203	671	3006
2340	1211	1336	3329	3136	424	2254	2424	2497	3211	4519	6337	4678	2313	2337	6956	2812	2342	8879	1594	2325	2140	3175	1431	3739	2553	8931	3937	5215	5567	3628	4499	8507	3195	1620	3075	999	1590	2915	2041	3715	3703	5823	3170	2262	4494	347	2325	4240	219
466	1148	293	341	1017	669	1467	615	504	946	405	1418	1377	509	195	1295	664	674	778	252	881	593	1648	269	547	473	765	743	749	3035	1442	803	2124	1181	1111	1006	851	501	152	277	694	1315	1257	1206	460	942	344	926	268	457
726	1004	262	1117	1871	441	810	562	1739	1482	906	2257	1518	1574	1620	2601	1069	996	2501	902	1120	676	1065	963	775	1566	2794	812	2123	1906	1364	1141	3114	1698	915	1229	1485	642	945	752	994	2420	2184	2091	889	1848	469	909	858	257
451	6154	3443	207	843	1338	1424	4368	1395	954	18	1226	1790	378	2387	72	1176	359	270	153	330	566	295	1043	501	132	3516	2242	22004	11646	598	1082	4317	3857	1638	1171	181	301	366	374	6600	2584	2603	3361	583	532	341	141	237	66
1076	1612	1521	1246	1778	389	823	1539	3666	7833	1170	3450	1343	2313	1297	4450	1379	4658	11616	4624	358	658	1667	595	2673	2301	3371	1030	1966	3451	1654	477	3054	3135	1120	1223	2150	643	1989	2360	1045	2130	4919	2084	987	5755	544	2489	5652	163
707	981	816	907	1078	531	1010	894	1110	1906	1858	3072	1796	5336	335	3392	489	1714	2254	1648	1033	609	651	1079	1343	1025	861	782	1725	1612	909	1154	1573	1955	738	743	1136	567	375	412	839	947	2000	888	296	1843	531	1219	828	522
1753	3491	3295	2445	4202	1467	1525	4559	3003	4912	3033	7234	6856	4559	3441	10596	1388	1782	3463	3646	5458	2834	6391	1716	3330	6158	3197	2085	9121	4294	5806	3396	4346	6142	2218	1394	2962	1744	1313	2164	3433	4447	8055	4663	1916	6361	1411	4791	3963	294
708	1449	740	670	1663	309	747	2027	853	2327	765	3199	1651	2212	984	7660	621	1628	2558	1763	1210	784	1009	527	922	1379	1055	575	3594	2147	1920	489	3109	2078	1027	799	1049	450	247	489	1265	2433	2630	2090	482	1723	202	1757	744	86
1527	2112	1340	1907	2654	2218	2416	3668	2560	3576	2163	2905	3561	1735	487	2813	2739	1816	2737	1179	2816	1333	1907	1645	2863	2596	3303	1946	2398	2148	2295	1486	6470	4839	2180	2774	1627	1505	821	1198	2373	2844	2371	1228	916	4185	664	1667	1348	2630
2053	2917	2106	2796	5090	1115	1975	4942	2963	8378	4323	11218	3947	3579	2305	5987	2259	3456	9788	3235	2748	2923	3104	2549	3181	3038	4339	3181	6477	6146	6687	2464	6773	3482	2732	2237	3771	1498	1115	2387	3188	4582	4959	5312	578	7645	1884	9005	2229	598
2082	2533	1914	3061	3395	1132	1097	4085	3572	9061	5555	7067	4662	3189	1326	5856	2609	3782	6553	3391	2097	2570	3483	2153	2838	3044	5640	2500	5980	6309	6353	2022	6004	4990	2694	2425	4452	1824	1245	2115	3266	3539	5057	4042	668	7526	1891	9119	2042	658
625	1028	610	966	1148	280	417	1356	941	2484	1441	2498	1325	908	522	2266	653	871	2471	803	680	855	568	339	923	996	1322	788	1495	1179	1564	463	1788	1008	700	676	964	380	367	808	751	1130	1391	1106	296	2122	447	2414	960	207
2938	13724	5203	5196	10928	5163	3467	5942	8627	6038	11722	6411	5441	2574	733	2049	5392	7092	18976	2762	4133	2183	3565	4173	4516	4318	12023	2389	1681	15343	8358	12556	8314	8166	3487	4239	2444	2571	4805	2827	5459	3563	2715	1854	1233	5230	1143	3231	8336	2192
535	890	216	938	1434	592	1257	2038	809	1814	851	2962	1623	490	239	934	1056	841	1422	542	1722	586	759	660	935	256	1557	1504	3464	1978	1281	816	3168	1402	1017	1093	442	838	312	553	1460	1222	1715	685	510	1264	409	818	924	309
584	869	837	890	1154	314	961	1587	941	2311	1196	3120	1456	1223	749	2301	703	1205	4181	1597	1036	694	884	536	1107	916	1420	836	2156	1982	1971	840	1927	1354	817	710	1267	451	548	974	848	931	1939	1418	356	2342	437	2406	978	120
1195	2525	1727	1432	3403	513	1977	3667	1718	6666	1925	7512	3096	2660	1982	5517	1700	3002	6328	2838	3741	1603	2372	2218	2138	2725	2789	1866	5732	5248	6973	1561	4916	3205	2060	1732	5283	831	445	1329	2479	4492	3346	4934	390	4899	1739	9215	720	739
1023	1666	1428	1213	2051	908	1704	2174	2582	4978	2814	4112	2798	1903	1269	6184	837	1849	5757	3708	1928	1497	2589	693	1953	1363	2196	1799	4513	2631	3654	1730	2029	3058	1133	724	3191	900	1898	1988	1324	1611	3862	2000	1796	4322	847	2978	3546	395
299	589	1736	415	380	1547	217	652	483	1145	2604	788	485	1752	87	4094	125	2043	5003	2683	3187	246	603	477	602	1784	291	216	1211	1926	627	367	296	1600	105	178	1240	431	844	199	156	190	2115	547	529	1662	394	374	1023	317
64	26	30	66	198	26	319	33	423	45	5	64	136	52	102	6	515	13	57	11	161	197	54	53	52	7	585	237	97	97	64	71	1367	180	1733	478	377	52	185	42	89	350	52	148	69	49	8	17	78	52
5872	32358	2657	8462	24405	1834	9179	54953	10654	19306	1343	88112	31092	12022	9118	2716	9519	4823	7346	1162	44042	12555	4727	14696	14813	11135	11995	29456	26577	21108	10913	12242	15829	7610	6862	10480	3471	6719	907	3890	35145	16521	58175	9354	3452	15269	12848	19828	2381	10213
1448	4322	2272	1635	3987	1643	2845	3964	1407	6758	3945	5908	5581	2841	1064	8064	1259	4330	5559	1513	7080	3611	4278	1667	2311	4002	1646	2668	3584	5560	3972	3960	3521	4555	2184	1874	2354	1883	319	658	1561	2478	7515	2435	496	5416	1042	3734	1420	1356
11321	30273	6441	16776	17921	9684	7344	18638	27934	29166	13699	64794	26049	9654	10434	20954	9951	17123	36945	8847	22684	8549	27797	12383	18417	8881	23012	16676	27851	27943	16941	21219	27488	33412	12822	9483	10703	8885	16022	15967	18348	11291	32408	10744	27891	22392	5858	16099	24698	2155
2221	2218	2707	1674	2928	2302	2121	2975	2689	5207	1731	4524	4045	4701	1043	4726	3467	3245	5684	3705	1497	1091	8991	2128	3235	2997	7613	3651	4311	5237	3086	2475	7138	4742	3839	3117	2435	1078	782	1152	2070	4037	6245	2932	1370	5195	524	4477	1923	682
1195	1658	955	1744	4237	1016	1462	2264	3146	4185	3066	6102	3766	2171	2639	5270	1533	2239	3551	1476	3871	2213	3456	2310	2244	3200	3416	2659	5082	6421	2745	5103	4386	2666	2388	1490	2020	1102	2123	1537	3431	3938	3674	4775	2335	4498	1316	1967	1687	749
0	3	0	0	6	0	4	0	2	3	0	4	0	0	3	0	6	0	0	0	0	1	0	3	2	0	0	0	1	2	10	1	9	1	1	6	0	2	1	0	0	0	0	1	1	1	2	1	0	7
588	860	647	650	1242	517	1291	1114	642	1871	1011	2257	1929	663	461	1345	622	982	1599	454	1291	556	807	898	992	702	1197	884	1257	1039	910	970	1430	1442	730	496	776	449	393	375	595	748	1362	581	498	1863	284	810	436	777
1657	2720	748	1489	2944	1048	2200	2423	1924	5581	3094	3921	2468	2096	469	2114	1059	4934	3368	1116	6226	1283	1138	1375	1828	3163	1213	1186	1519	3558	1590	1253	3249	2688	1432	1098	2224	782	847	1127	1433	1320	2669	1272	917	5057	1335	1385	2372	2659
825	166	69	259	549	14	394	127	798	829	55	1087	175	542	112	93	554	205	469	101	108	133	99	207	384	226	953	189	141	304	333	85	1306	387	356	578	327	108	155	265	324	1192	172	698	62	477	29	523	214	70
2244	3817	3075	2729	4783	2713	4837	4883	3387	14515	4878	9294	6723	4003	1497	15196	1958	6010	11184	4192	13302	2452	5291	3813	3501	4264	4267	2806	6652	6641	5172	4752	4726	8787	1962	1978	6273	2552	1444	1562	3210	3635	7784	3460	1365	7957	2764	4239	2421	4611
357	769	661	265	1841	357	819	972	946	675	346	1304	601	300	240	760	716	1122	573	832	699	130	540	619	672	273	995	387	609	1393	1868	686	2094	1077	901	678	2492	202	608	962	743	1946	2803	939	718	1036	672	1314	381	884
1235	1930	2320	1802	2578	559	1615	1682	3986	3679	1518	5141	3333	1659	2272	1779	1566	1841	4387	2172	3168	1773	1359	2990	2218	1603	4948	2039	3428	3437	3219	995	4945	3354	1654	1604	1808	1093	1892	1597	1694	2700	3246	2216	965	3321	809	2602	6498	214
3134	5225	3043	4835	6729	2100	4021	10083	10539	7520	2478	22923	9155	3818	4551	12255	3139	6574	11166	3293	8749	4739	5640	4023	4847	4705	8204	4423	6802	8071	5597	5772	7261	9953	3253	2908	3231	3149	8724	8862	7512	4202	10318	3095	11827	14734	1955	6383	7779	2573
515	687	441	714	1033	718	660	544	1217	1765	995	2125	599	823	662	1180	863	568	1675	587	1043	495	553	311	682	1076	1755	620	4556	800	498	400	2391	1993	756	931	555	553	296	570	510	959	1458	1091	350	1364	325	1056	741	114
56	135	18	50	76	13	58	27	57	80	6	75	54	24	19	18	67	33	46	3	31	22	28	24	36	59	125	30	81	31	53	24	309	38	224	77	36	27	20	14	172	173	25	63	8	76	14	258	10	15
0	0	0	0	0	0	0	0	0	1	86	0	0	0	1	136	0	0	0	1	0	0	1	0	60	0	0	1	0	0	0	0	2	7	1	1	0	0	2	1	0	0	0	1	249	0	0	2	3	0
106	826	9	544	1045	344	80	19	320	263	4538	620	2594	1942	69	197	81	292	4235	711	5	840	5391	6	195	538	244	424	10	1920	3	109	683	350	20	15	248	31	222	183	425	241	2684	418	11	180	6	11	503	14
0	0	0	0	1	0	4	0	0	1	0	1	0	1	1	2	0	0	0	0	0	1	1	0	0	0	0	1	0	0	0	0	0	3	0	0	0	0	0	0	0	0	0	2	0	1	0	0	0	6
1525	893	520	1014	7788	1113	2325	3916	2106	4435	2458	5151	5616	1130	1845	1905	1853	2853	1398	540	1382	1204	3880	871	2616	1742	1808	3183	2228	4666	2553	3824	6023	2231	3069	2431	1200	1101	246	953	2340	3744	2428	1729	380	4092	2096	4008	536	2058
10148	10473	2472	13344	6315	1223	24110	105150	21378	15322	1016	69750	40171	4534	3158	838	13090	2082	4990	427	10591	15152	1343	19928	14776	4578	19273	16021	81636	3580	18033	2724	36558	19451	11330	16609	2303	3274	2049	12523	13877	11718	28645	4980	1990	35200	2289	36878	1923	12691
614	1405	55	176	480	109	675	113	651	436	45	351	312	364	25	134	155	307	218	19	766	230	22	83	242	184	197	602	100	152	153	119	421	210	564	303	212	116	36	56	343	616	20	422	13	253	20	148	62	101
0	0	1	0	0	0	0	0	0	0	0	1	0	0	0	0	0	0	0	0	1	0	0	1	0	0	0	0	1	0	1	0	0	2	0	0	0	0	0	0	0	0	0	1	0	19	0	2	29	1
1977	3020	1045	2129	4619	1035	4658	7590	2097	5182	2342	6020	4530	1570	1642	3825	1486	2414	7826	2192	9171	1450	3946	1717	2609	2101	2025	2748	5241	4102	5258	3301	4027	3785	1897	1483	3929	1071	1339	2716	2011	2358	5792	1972	1766	4318	1580	4206	1983	1049
12311	12408	4922	14693	21134	10469	21495	51291	9910	30794	16125	55917	28957	9724	5665	14604	9066	17462	47058	17902	38499	6714	17570	20663	14541	15751	10511	20897	29420	41158	33074	17061	25489	29545	11979	9045	25513	6672	5453	8795	16343	10488	29135	11038	6324	29463	10438	16189	7661	10667
3770	6081	4337	5931	9826	3346	8621	10294	5877	12872	7911	13838	11215	4620	6517	15218	4172	11777	29622	5224	7094	3573	6489	6480	8417	4921	7657	5281	9110	12631	13086	8544	11146	11394	5421	3961	9197	2804	3325	5491	6658	4906	8702	5869	2844	13265	4529	12074	8015	2807
2063	4002	2232	3234	4251	2017	3503	5290	3989	6186	3993	5729	5043	2365	2118	5038	2232	5600	18166	1977	5075	2684	4420	2239	3840	2380	5821	2644	9894	7592	5240	3059	5486	5948	2321	2024	4230	1260	3529	4493	3804	2557	5425	3476	2551	6986	2074	4577	4540	1233
2110	1744	1597	2280	5871	740	256	1534	2883	6372	1748	2588	3965	3944	5498	7392	2259	4558	6056	2646	5206	2748	8524	1956	2182	2588	12683	3831	6030	7879	1489	10924	3743	3065	1363	1237	2935	1687	1080	1404	3648	2660	11058	6573	1399	3729	3099	3077	2230	154
1933	1878	769	1349	2932	314	905	483	3601	4607	922	3667	1982	2854	796	533	2109	2006	2643	2433	890	829	2328	388	1913	1708	13608	739	2099	1692	2103	851	3840	1979	1189	2546	1863	641	675	1119	1588	5773	1979	3491	842	4896	271	2841	1166	652
508	301	246	528	1271	376	2892	485	548	1868	8552	1186	2132	352	1316	234	630	621	615	74	626	270	357	2204	831	360	707	863	376	1014	399	2830	1915	787	1204	861	208	783	245	117	1108	1244	437	274	157	929	395	105	412	1021
1	6	2	8	105	22	5	10	4	12	12	22	213	4	70	3	0	71	909	9	140	82	573	0	13	29	1	22	25	425	7	156	3	20	6	1	12	203	163	3	11	13	7	363	160	6	2	0	443	0
566	463	77	231	1088	640	889	137	1416	1295	95	958	136	685	185	309	299	780	512	261	247	210	166	560	786	664	312	277	158	479	404	335	886	440	336	696	1621	139	611	587	306	1133	489	572	349	1268	407	340	655	1835
374	600	497	571	675	249	435	931	1453	8466	756	1612	683	339	581	1230	241	683	1524	839	642	568	403	301	754	553	613	399	1170	1166	1059	532	871	860	436	274	759	302	736	927	642	456	815	816	530	1180	572	1649	2162	157
1357	215	288	673	1446	272	822	411	1385	4759	69	1038	1400	333	150	402	1837	904	10909	55	244	277	77	450	1016	496	1194	903	232	720	1393	1212	5410	1316	2820	1665	237	644	162	357	884	1465	198	1424	116	995	288	1716	399	143
787	423	268	802	1172	624	3113	428	995	1359	297	1519	797	373	395	94	1336	1178	411	112	2129	343	219	1302	1052	384	1148	821	2581	985	518	416	3380	1754	1016	1992	2063	468	244	536	1742	1341	396	509	71	910	418	476	343	2867
10	16	6	10	8	8	18	7	27	27	10	25	7	30	55	10	18	29	34	25	5	6	57	19	36	10	24	10	53	23	22	13	85	106	9	25	77	8	73	6	14	60	13	77	1	15	10	96	6	5
1338	245	92	759	1017	201	2271	344	601	623	339	1354	1027	261	168	93	3260	1883	732	90	652	399	432	377	1204	514	2726	1185	441	539	1085	410	13484	1249	3114	3395	250	411	192	372	791	1663	536	500	48	698	102	1358	274	535
22	212	351	20	345	9	48	1413	233	55	3	534	1820	57	1139	165	55	210	25	34	14	103	140	1020	354	12	204	845	48	552	1324	723	198	40	150	58	55	6	14	282	429	458	41	468	77	22	88	204	64	21
18	6	10	168	226	1945	133	53	126	68	8	69	428	61	21	14	185	89	3837	11	201	39	200	17	64	45	753	156	190	107	27	74	1019	301	447	122	64	56	95	24	69	327	631	212	11	53	10	46	37	5
2160	3726	1872	5112	3065	8176	2687	2320	4574	4963	7404	4391	3806	3421	1365	3641	2345	4338	11975	3872	4677	1761	4129	1100	3282	3577	12649	2681	3885	7418	2175	4465	5335	4546	2208	2583	13062	2606	4696	3785	3134	3333	8258	3368	3409	8295	2024	6887	7252	1355
406	581	525	832	706	813	1447	782	461	1773	5370	1774	805	1536	153	926	597	899	1504	553	429	452	3288	526	766	1226	640	482	859	1208	423	486	1817	1292	615	754	390	542	681	1552	687	550	417	415	217	1381	124	652	866	902
268	571	229	249	673	189	339	1190	534	538	178	865	682	342	248	648	241	485	641	236	648	349	570	415	272	441	429	391	510	426	529	417	661	427	366	241	261	140	154	400	521	422	513	338	198	746	171	404	491	638
1066	1280	1896	2385	2318	2121	2397	2552	2530	7170	3661	3470	2935	1536	1158	4649	1029	4687	5437	2329	13910	1925	5660	1444	2048	2449	3983	1694	2388	4937	1666	2606	2531	3493	1080	955	2061	1205	2014	1295	2048	1111	3197	1098	1614	4400	960	1099	5381	1498
652	522	667	826	1100	509	536	1006	860	1649	1422	1451	1277	387	1167	1603	396	905	2224	472	1623	583	1104	577	840	458	830	742	1380	898	621	565	1183	1184	709	429	613	492	584	749	1552	610	1199	790	775	984	359	1304	1041	295
2395	7399	2948	4255	5823	1581	1596	10024	3323	2967	1385	10408	8521	3505	1741	2410	2844	2408	8112	1405	1602	6435	1952	1844	4109	3763	5804	3021	7994	3946	3689	3406	5637	3771	2228	2606	1594	1278	1738	7321	6708	3059	5396	2120	1751	10605	802	4383	2566	3963
726	2029	1517	1317	2047	538	1189	857	2646	2543	1681	2772	2480	1165	1152	1900	693	932	7825	1404	3630	1348	1123	527	1730	1056	2341	940	2192	2352	1592	826	1751	3291	858	772	1834	600	961	1397	1066	1951	3658	2109	2232	2241	581	1182	2287	136
870	1587	1218	1040	1636	1826	1280	1061	2685	3888	1158	2486	1825	1031	777	5305	776	1632	5333	1603	2639	978	2482	1040	1426	1382	2158	1171	1942	3409	1854	1291	1999	2837	937	841	1375	821	2940	1475	1085	1548	3299	1668	2591	2282	1186	869	2742	699
1099	1698	2505	937	2842	1289	2297	4169	1798	4735	2502	5041	3628	1587	1074	720	1474	3949	2053	304	4089	1211	1178	1791	2427	1261	1507	1230	9393	5447	4536	3199	4355	2837	1655	2265	2845	1108	142	783	963	3169	4377	1040	834	2556	1198	1840	541	2767
31	47	7	9	10	6	25	3	20	44	3	38	2	17	2	14	11	70	18	7	7	9	39	13	21	9	0	4	20	39	5	13	46	14	24	15	50	5	3	13	5	11	5	12	7	9	14	38	18	17
4	6	5	14	15	6	19	2	19	31	3	28	3	25	20	5	9	9	2	3	11	2	19	6	28	29	28	9	83	23	7	14	43	83	4	4	23	10	46	10	7	18	51	42	8	28	2	14	14	4
1662	2291	1532	1432	3424	717	2663	4377	1226	6417	5218	7227	4316	3294	1351	3875	1623	1900	6034	2547	3467	2168	3506	1892	2107	3210	2683	1446	7430	6144	2279	1926	4897	3796	1713	1803	2783	1084	273	953	2309	3114	6413	3374	381	3844	418	3555	739	477
1186	1567	1729	1177	2961	1523	2574	2057	1231	3488	1802	3675	5314	1149	867	3370	1403	2562	3172	964	4720	1677	2642	1467	1754	2395	1783	1415	2134	4862	2531	2004	4273	2857	1973	1598	2639	886	531	618	1552	2291	3019	1645	593	3197	1013	2113	708	2049
2007	3716	2677	1635	6821	1376	4715	7142	4791	13088	2770	8250	5376	2239	7839	3818	2586	2416	11732	2636	6477	2708	1701	2678	3938	2114	4197	2064	3863	5451	3050	3766	10185	4695	3853	1712	5743	2648	2710	2766	3729	2196	5507	3375	1094	8319	4882	3446	1909	1282
701	626	5806	983	1965	668	1529	447	3532	10834	10791	890	5039	2159	1108	11078	1809	17546	11294	5779	7541	875	4353	1405	2552	2715	3286	1505	3070	20563	3872	6794	7354	4084	3172	1144	23047	2266	10293	851	3859	2220	727	8673	7655	4492	4021	2813	17602	475
790	3406	1199	1144	2076	1290	2356	2051	926	3404	617	4563	3419	759	1414	3141	1334	3324	4011	1717	6043	1550	1366	1743	1645	1591	1398	1269	2062	2901	1861	1195	3940	2563	1989	1259	2126	746	176	927	1687	1653	1631	764	421	3272	993	1732	565	1132
673	5567	18	4041	204	35	2359	2189	56	122	362	15060	113	3594	24	114	94	31	552	43	421	1123	72	48	186	2088	97	105	577	48	3166	17	272	551	139	54	1904	293	189	882	46	152	11405	440	706	18758	20	4686	249	3972
1029	283	44	954	1652	494	1078	1022	1609	1745	64	1386	307	877	40	129	573	498	1315	751	188	290	1064	214	1061	1467	1761	269	872	828	337	313	1763	1624	542	517	997	185	572	1022	670	1111	1195	370	782	3651	200	1079	1319	1330
22	16	1	21	40	11	85	3	68	10	17	40	15	8	0	2	220	7	24	1	22	9	1	1	67	2	159	46	76	13	43	14	567	147	255	209	1	34	9	20	11	51	4	14	11	20	0	14	7	17
3445	4437	6286	4742	6126	6310	5430	4906	4923	10751	4541	8936	13395	2213	1894	13446	3099	17142	15091	4776	7418	2852	7414	4204	5742	4242	5442	6186	7005	23028	3712	12842	9843	12799	3145	3204	6086	4681	5258	3356	3694	3778	7304	4045	5622	8637	4307	2820	6609	3105
295	791	325	303	968	324	1027	1048	552	732	1172	1395	683	279	576	1150	370	858	893	373	1382	315	709	689	350	542	552	638	542	1225	968	351	1204	1056	537	476	2332	360	348	358	357	754	1302	838	252	956	717	426	405	810
662	814	498	767	1378	461	1119	2599	545	1939	1953	2270	2023	771	240	1283	950	1168	1284	299	1475	973	887	791	1043	897	1010	1046	1144	1199	1445	657	2789	1722	1360	1172	1137	815	163	426	1030	1108	905	557	161	1468	204	892	361	823
1775	2580	1826	2363	3736	1957	5072	3971	3374	4231	6556	4644	3032	1277	908	3133	2183	3590	4840	4776	5957	1358	2259	1453	1914	3228	4158	2536	2125	6666	2805	1912	4886	8073	1881	2328	7416	1501	2068	1650	2224	2212	4980	1915	1714	5045	1623	2418	3926	3249
101	172	78	199	147	166	247	51	145	303	224	306	372	75	155	466	138	124	355	325	739	68	280	63	302	91	146	143	256	436	201	160	564	1047	175	175	347	241	197	60	100	239	268	301	69	173	107	135	110	96
3	2	5	1	27	0	1	2	8	4	2	10	2	7	2	4	9	2	12	2	1	1	7	2	2	3	7	1	10	9	6	1	17	3	11	13	4	1	0	0	4	19	5	15	0	5	0	7	1	1
1219	932	348	3716	1422	2043	934	4586	1642	1111	4569	3602	7214	1927	4235	1839	2488	1392	12008	1145	617	1582	9182	838	3641	761	4103	8876	2675	4504	2175	1238	6948	4580	1707	2111	340	2494	890	612	2265	1744	11634	1928	475	3000	57	1563	1765	199
5110	9188	5996	5262	9541	4643	7104	7626	6320	9656	5454	18806	15828	6081	4622	9068	5033	4126	12193	4491	10108	5286	9144	3736	8538	4710	7301	6689	12923	17090	7283	6829	14082	17066	6281	6131	4250	4328	1016	3949	7282	8163	26365	8094	2945	9208	1384	6392	2205	719
765	991	442	1085	1913	417	570	949	1117	2065	1007	2297	1472	1760	1574	2587	764	1091	9426	1242	1341	1182	2766	471	1409	1107	2059	1111	2123	1592	862	633	1943	1274	627	662	884	432	677	509	805	1421	3739	1938	653	1498	161	1026	1601	64
496	830	607	784	1710	314	421	1345	614	1982	1216	2609	1671	1477	698	2203	430	1429	1457	467	1007	1346	2075	485	1289	869	979	1000	2249	2696	1585	677	1580	1312	987	798	1213	625	219	427	856	1254	1416	1142	188	1837	335	742	346	475
766	1871	1303	771	1873	671	1908	1107	1362	3044	561	3216	2035	928	525	1410	1111	1442	2513	1222	1596	1208	2022	1439	1348	1410	1787	1155	3795	3123	1693	1947	3267	2008	1311	1448	1280	468	328	774	1328	2985	1851	1941	252	2936	1040	1523	695	1098
604	873	1351	870	1368	509	743	1224	1027	1660	1157	3014	1176	1910	1047	2745	671	1828	3134	1599	1877	652	1446	1094	936	1835	2620	772	2396	2441	1739	832	1818	1632	617	524	1181	671	1122	881	1020	1210	2405	1290	1024	2772	486	1499	1286	226
608	2249	618	846	1424	373	2089	758	3153	2774	840	1315	1405	626	1265	2350	347	1197	4764	1182	1451	1202	794	762	876	587	1091	774	5583	1923	1764	1396	1051	1198	500	418	1055	479	6349	1757	914	846	855	1124	8189	983	646	429	2832	327
842	4322	5409	927	4912	284	3128	7767	6364	4519	3	4752	6847	211	6696	5846	909	815	74	4953	3834	4274	443	4184	2864	78	2453	6818	2152	6950	2041	2518	3359	6066	2499	879	3819	1235	183	162	5576	1894	11228	1320	93	677	1290	1053	634	22
551	604	2576	955	1156	752	1100	1096	1407	1594	417	1457	1715	860	576	2666	732	1603	2377	1401	1105	426	589	1004	1493	576	1800	775	1545	1575	973	778	2101	2456	666	553	1202	639	837	725	817	899	2722	657	828	2118	581	805	1007	413
44	2	1	2	6	0	7	0	2	29	2	2	4	2	2	14	16	0	5	7	89	1	5	2	5	4	42	4	2	3	13	0	13	5	26	12	125	1	0	4	9	31	3	21	1	9	0	0	17	4
966	2682	1326	957	2648	587	1725	1747	1926	4541	3039	4113	1542	1524	2005	3531	1574	1641	2743	1251	7961	1475	1906	1607	1520	2658	3181	1718	2743	3783	3202	1665	5007	2614	1712	1765	7033	1095	568	1169	1587	3624	3672	2710	904	3971	1894	2181	1135	664
2164	4267	1612	3404	5479	4387	4978	8293	2830	16291	5960	7442	8688	3784	1062	3628	8108	4630	3411	1309	7799	4216	3025	2290	4514	5056	8326	5404	6425	7348	7614	4517	21867	10356	9244	11445	3338	4248	690	1864	4377	9575	6552	5600	620	8378	2302	4459	1786	1491
8	54	50	9	30	13	47	14	29	51	12	48	9	25	20	97	10	38	109	25	88	24	48	36	19	47	8	21	49	33	49	22	44	43	14	42	56	11	37	20	6	63	16	33	20	41	23	18	36	87
394	1377	581	639	1254	462	1570	638	1128	2906	794	1771	662	611	450	2163	810	2112	2749	576	1865	621	384	927	922	635	819	668	3305	2120	1014	897	2558	1678	889	776	1879	575	1080	624	797	895	679	1057	1020	971	373	560	856	416
36	164	19	119	71	29	326	24	133	787	3	223	119	145	145	4	7	46	155	11	4	3	88	115	75	73	42	3	972	45	194	5	33	90	8	15	70	37	58	588	615	277	265	106	12	113	142	2524	13	30
68	21	102	188	202	121	182	196	179	62	2	645	200	27	7	76	431	274	695	384	33	47	88	149	37	222	895	104	132	67	77	26	1444	229	611	400	173	28	77	101	111	284	313	65	45	230	1	126	139	21
0	6	0	0	3	0	0	0	0	3	3	340	1	1	0	0	1	1	2	0	1	18	1	0	0	6	1	2	6	0	0	0	14	70	0	5	0	1	1	1	0	1	2749	0	2	5	61	97	54	0
46814	109864	29509	79708	155232	33248	49418	85479	50225	103617	149686	128308	109364	49227	31603	95032	18744	117015	122920	22333	161506	67855	120630	40362	40702	85627	60675	58748	194943	197872	78887	87482	48947	66732	23753	22508	36806	69297	28632	43106	37396	75207	141751	47395	40217	217478	80301	17043	55079	34979
[truncated: 3,602 more rows]
[truncated: 206 more columns]

## Sheet: Supplementary table 7
Table SVII. Cibersort results.
[truncated: 514 more rows]

## Sheet: Supplementary table 8
Tabel SVIII. MCPcounter genes.
HUGO symbols	Cell population	ENTREZID	ENSEMBL ID
CD28	T cells	940	ENSG00000178562
[truncated: 110 more rows]

## Sheet: Supplementary table 9
Table SiX. MCPcounter probesets.
[truncated: 178 more rows]

[truncated: 5 more sheets: Supplementary table 10, Supplementary table 11, Supplementary table 12, Supplementary table 13, Supplementary table 14]
